# Supplementary material for: Multidimensional Landscape of SA-AKI Revealed by Integrated Proteomics and Metabolomics Analysis
Source: MDPI journal article supplement (doi:10.3390/biom13091329), 2023-08-30
Supplement: s1 [file s1]

# Multidimensional Landscape of SA-AKI Revealed by Integrated Proteomics and Metabolomics Analysis

Jiatong Xu <sup>1,2</sup>, Jiaying Li <sup>3</sup>, Yan Li <sup>1</sup>, Xiaoxiao Shi <sup>3</sup>, Huadong Zhu <sup>1,\*</sup> and Limeng Chen <sup>3,\*</sup>

- <sup>1</sup> Emergency Department, State Key Laboratory of Complex Severe and Rare Diseases, Peking Union Medical College Hospital, Chinese Academy of Medical Science and Peking Union Medical College, Beijing 100730, China
- <sup>2</sup> Medical Research Center, Peking Union Medical College Hospital, Chinese Academy of Medical Science and Peking Union Medical College, Beijing 100730, China.
- <sup>3</sup> Department of Nephrology, State Key Laboratory of Complex Severe and Rare Diseases, Peking Union Medical College Hospital, Chinese Academy of Medical Science and Peking Union Medical College, Beijing 100730, China
- \* Correspondence: zhuhd@pumch.ac.cn (H.Z.); chenlimeng@pumch.cn (L.C.)

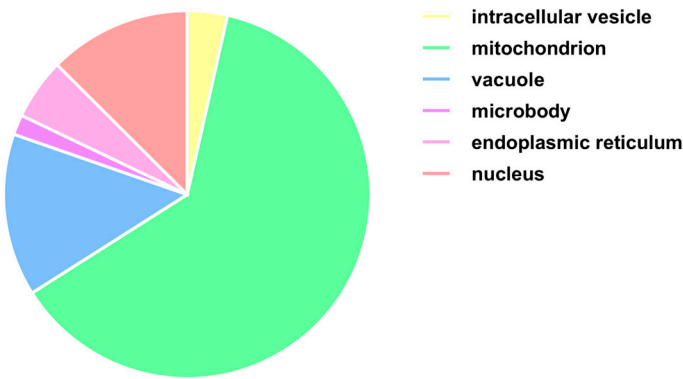

**Figure S1.** Cellular component enrichment analysis of downregulated proteins in SA-AKI kidneys analyzed by PANTHER 17.0 [59].

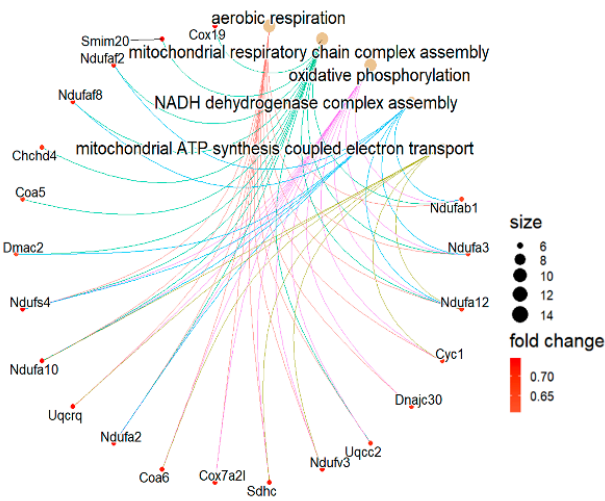

**Figure S2.** Cneplot representing shared genes between the top five enrichment pathways in GSEA analysis of all identified proteins based on the GO database.

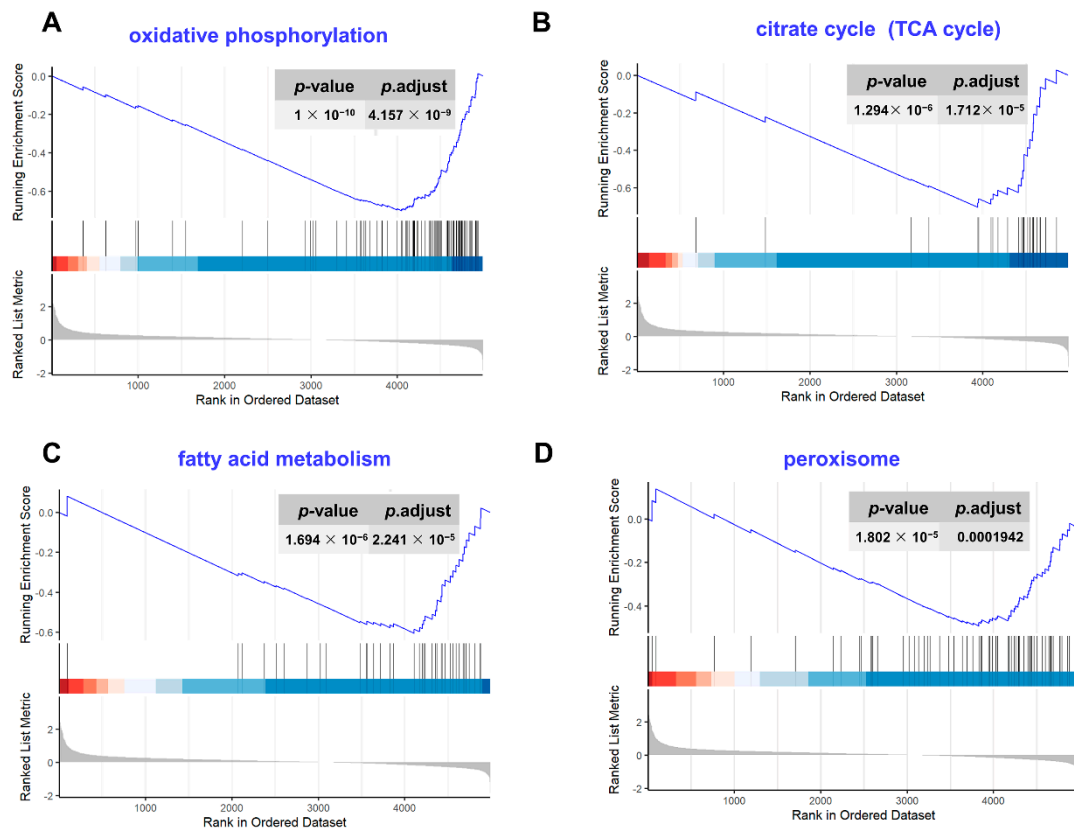

**Figure S3.** GSEA analysis of all identified proteins in proteomics analysis of SA-AKI kidneys compared with the control group based on the Kyoto Encyclopedia of Genes and Genomes (KEGG) database. (A-D) GSEA plots showed oxidative phosphorylation, citrate cycle, fatty acid metabolism, and peroxisome metabolism were significantly downregulated in the KEGG database.

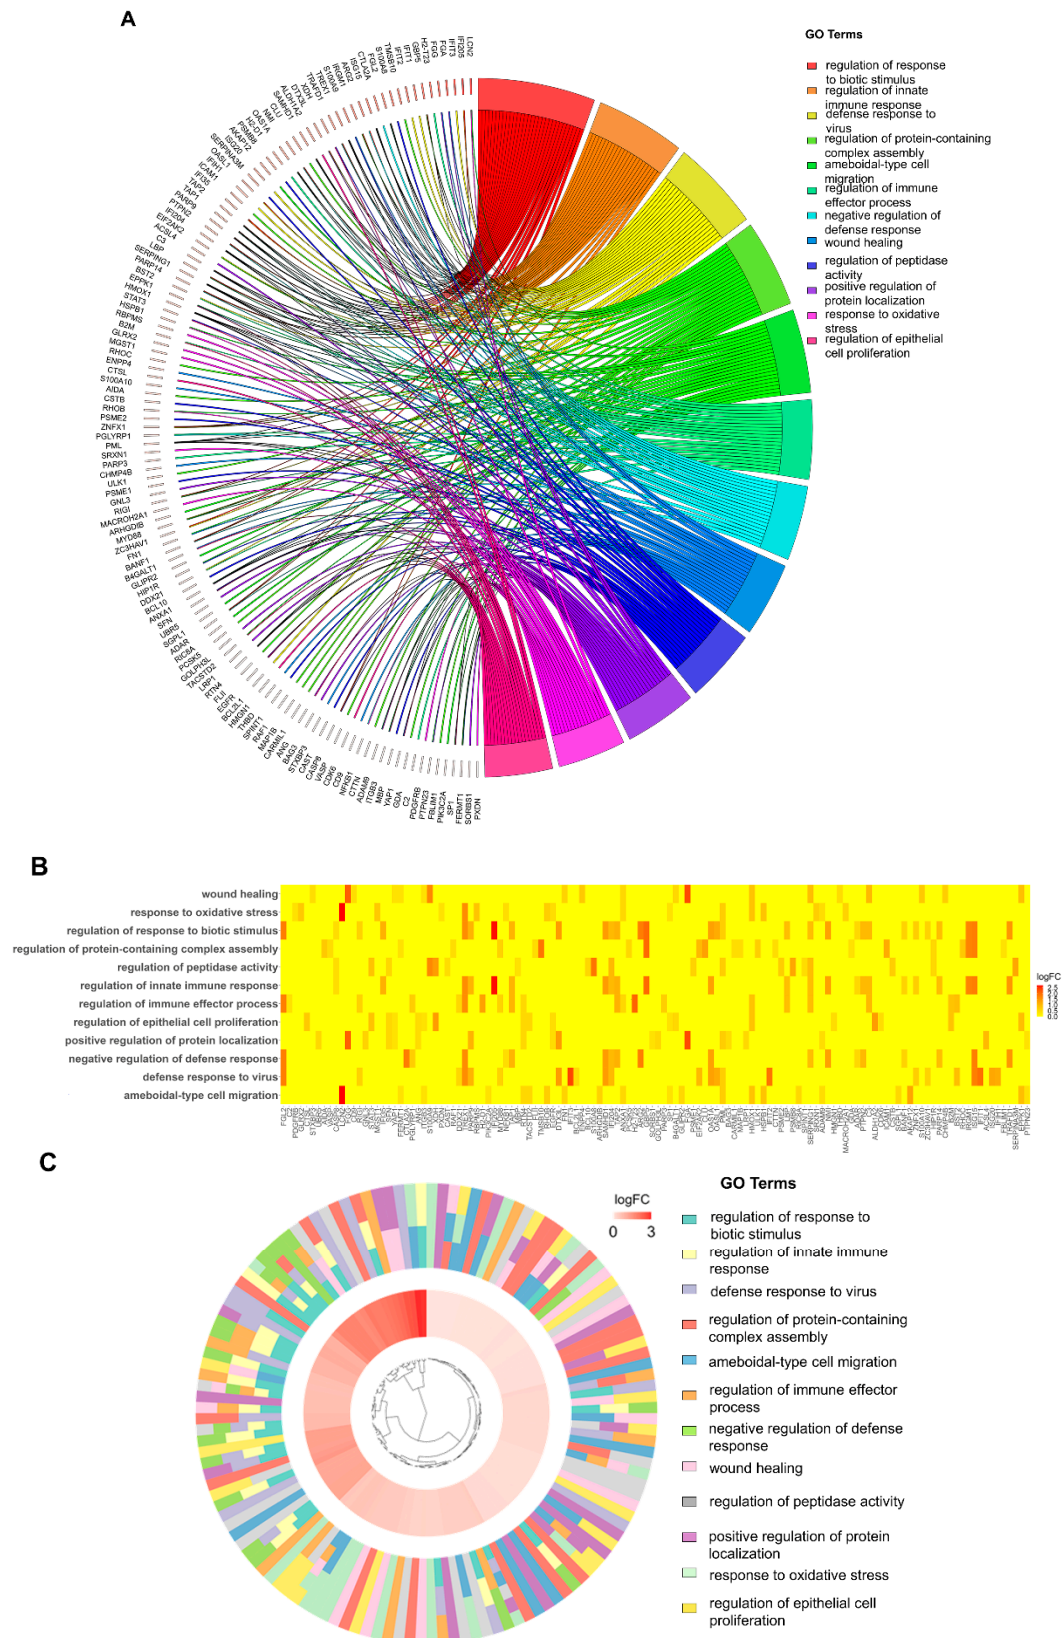

**Figure S4.** GO plots of upregulated proteins in SA-AKI kidneys. (A) GOChord plot visualized the interaction between the top 12 terms and proteins. GOChord plot was visualized with the R package GOpot [28]. (B) GOHeat plot visualized the interaction between the top 12 terms and proteins. (C) The cluster results of the top 12 terms were visualized by GOCluster plot.

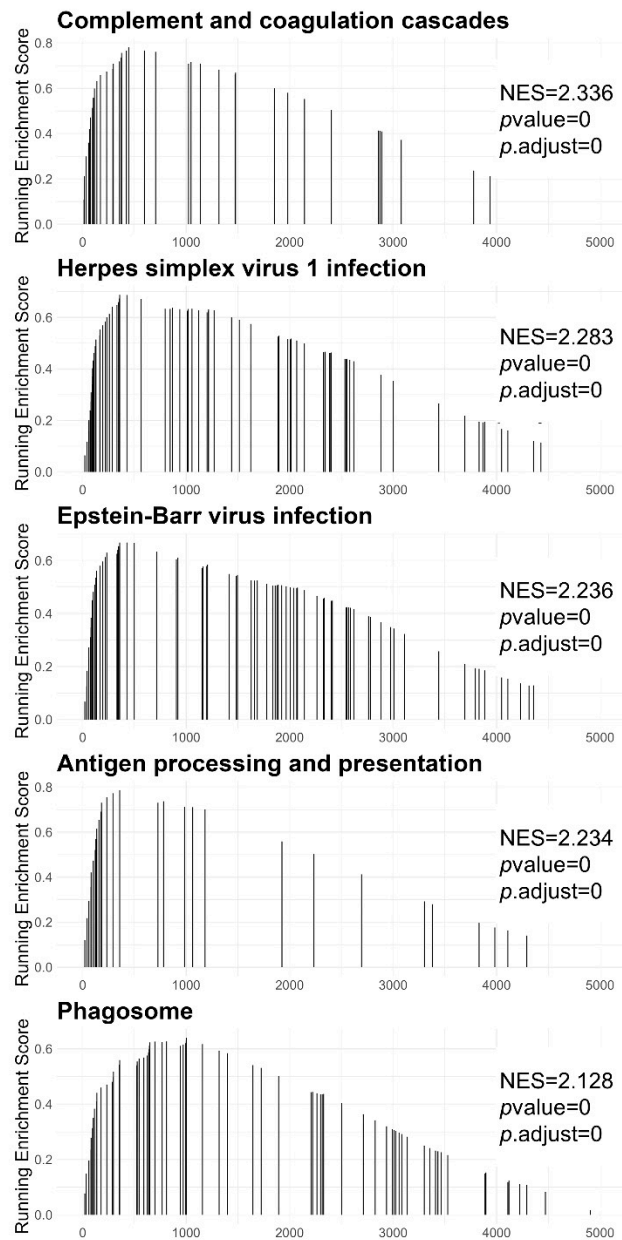

**Figure S5.** The top five upregulated pathways according to the GSEA normalized enrichment score in the KEGG database.

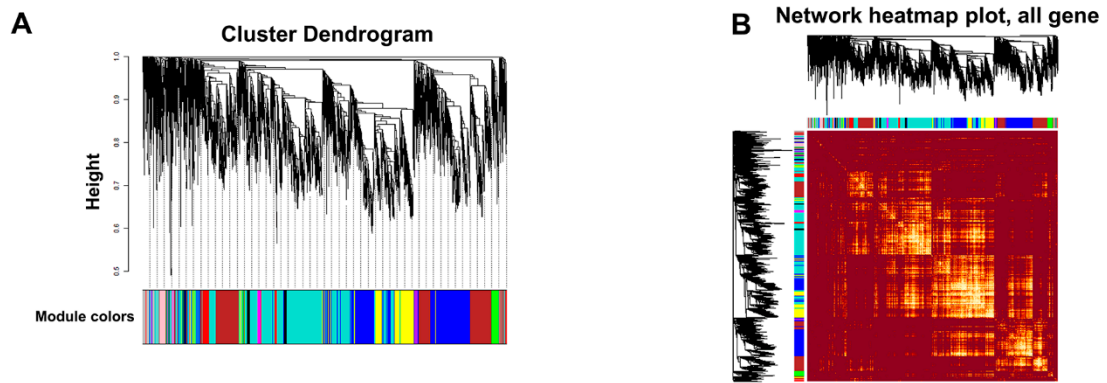

**Figure S6.** The co-expression network of proteins in SA-AKI kidneys constructed by weighted gene co-expression network analysis (WGCNA). (A) The clustering dendrogram showed 12 protein co-expression modules with dissimilarity based on the topological overlap. (B) The network heatmap plot visualized the protein network and depicted the Topological Overlap Matrix among all proteins.
