# Supplementary material for: Multidimensional Landscape of SA-AKI Revealed by Integrated Proteomics and Metabolomics Analysis
Source: Biomolecules. 2023 Aug 30;13(9):1329. doi: 10.3390/biom13091329 (PMC10526551; doi:10.3390/biom13091329)
Supplement: Supplementary file 1 [file biomolecules-13-01329-s001.zip › Supplementary Table.xlsx]

## Sheet: Table S1
Table S1. The primers used in this study.
Primer	Sequence
qPCR-mActb-F	CACTGTCGAGTCGCGTCCA
qPCR-mActb-R	TGACCCATTCCCACCATCAC
qPCR-mLcn2-F	TCTGTCCCCACCGACCAATG
qPCR-mLcn2-R	GGGGAGTGCTGGCCAAATAA
qPCR-mKim1-F	ACATATCGTGGAATCACAACGAC
qPCR-mKim1-R	ACTGCTCTTCTGATAGGTGACA
qPCR-mTnfa-F	CCCACGTCGTAGCAAACCA
qPCR-mTnfa-R	ACAAGGTACAACCCATCGGC
qPCR-mIl6-F	CGGCCTTCCCTACTTCACAA
qPCR-mIl6-R	TTGCCATTGCACAACTCTTTTC
qPCR-mSat1-F	ACTGGACCCCTGAAGGACATA
qPCR-mSat1-R	CAGCGACACTTCATGGCAAC
qPCR-mSrm-F	ATAACTCGGACATGCACCGT
qPCR-mSrm-R	GGTTGGTGGGCAAGAGTCAT
qPCR-mSms-F	CCTCTTACGGTGTTTGTCCC
qPCR-mSms-R	GCACTTGCACATCCTACAGTC

## Sheet: Table S2
Table S2. The list of all proteins identified in the SA-AKI (sepsis-associated acute kidney injury) proteome.
Accession	Description	Score	Coverage	Abundances: Control 1	Abundances: Control 2	Abundances: Control 3	Abundances: Control 4	Abundances: Control 5	Abundances: SA-AKI 1	Abundances: SA-AKI 2	Abundances: SA-AKI 3	Abundances: SA-AKI 4	Abundances: SA-AKI 5
P63330	Serine/threonine-protein phosphatase 2A catalytic subunit alpha isoform OS=Mus musculus OX=10090 GN=Ppp2ca PE=1 SV=1	207.201	73.4628	97.3	96.2	98.5	95.1	96.7	93.8	102.5	105.2	109.4	105.3
P62715	Serine/threonine-protein phosphatase 2A catalytic subunit beta isoform OS=Mus musculus OX=10090 GN=Ppp2cb PE=1 SV=1	205.673	73.4628	91	93.6	97.5	90.3	94.9	100.1	111.7	102.3	110.2	108.5
Q8BFZ3	Beta-actin-like protein 2 OS=Mus musculus OX=10090 GN=Actbl2 PE=1 SV=1	185.89	37.234	90.7	85.7	98.6	105.7	98.3	110.9	88.6	116.5	99.5	105.5
Q9Z0N2	Eukaryotic translation initiation factor 2 subunit 3, Y-linked OS=Mus musculus OX=10090 GN=Eif2s3y PE=1 SV=2	180.919	51.6949	75.7	100.2	101.4	110.8	114.1	97.6	99.1	99.9	92.3	109
P21550	Beta-enolase OS=Mus musculus OX=10090 GN=Eno3 PE=1 SV=3	132.088	29.4931	86.2	109.6	112	104	100.4	114.2	106.1	86	88.9	92.6
P62984	Ubiquitin-60S ribosomal protein L40 OS=Mus musculus OX=10090 GN=Uba52 PE=1 SV=2	125.374	60.1562	101	97.2	101.5	97.8	99.5	92.9	101.7	92.4	102.6	113.3
Q9CXU9	Eukaryotic translation initiation factor 1b OS=Mus musculus OX=10090 GN=Eif1b PE=1 SV=2	101.135	53.9823	104.1	112.8	115.8	121.2	104	94.6	88.8	92.3	78.4	88.1
Q9CQ19	Myosin regulatory light polypeptide 9 OS=Mus musculus OX=10090 GN=Myl9 PE=1 SV=3	96.627	59.8837	86.8	84.7	91.5	96.8	91	121	124.6	102.3	96.4	105
Q91Z98	Chitinase-like protein 4 OS=Mus musculus OX=10090 GN=Chil4 PE=1 SV=2	96.261	24.3781	45.1	97.9	59	82.1	55.3	228.7	165.1	100.3	57.6	108.9
Q3THE2	Myosin regulatory light chain 12B OS=Mus musculus OX=10090 GN=Myl12b PE=1 SV=2	89.232	54.6512	76.1	91.9	80.4	104.6	90.4	124.9	104.8	112.5	100.4	114.1
P29387	Guanine nucleotide-binding protein subunit beta-4 OS=Mus musculus OX=10090 GN=Gnb4 PE=1 SV=4	76.455	29.4118	89.9	151.6	116.8	108.9	101	82.7	95.4	86.2	81.3	86.3
Q8VEH3	ADP-ribosylation factor-like protein 8A OS=Mus musculus OX=10090 GN=Arl8a PE=1 SV=1	76.081	39.7849	94.6	95.5	92.7	89.7	100.3	94.1	110.4	109.6	106.5	106.7
C0HKE5	Histone H2A type 1-G OS=Mus musculus OX=10090 GN=H2ac11 PE=1 SV=1	73.708	40.7692	65.7	77.6	49.5	126	75.6	153.4	89.3	158.7	92.3	112
P02301	Histone H3.3C OS=Mus musculus OX=10090 GN=H3-5 PE=3 SV=3	71.699	56.6176	58.7	70.9	70.2	87.2	95.3	136.7	134.3	114.5	130.8	101.5
P61028	Ras-related protein Rab-8B OS=Mus musculus OX=10090 GN=Rab8b PE=1 SV=1	67.278	43.4783	99.8	85.8	93.3	97	100.6	103.9	111.8	100	106.6	101.2
P15392	Cytochrome P450 2A4 OS=Mus musculus OX=10090 GN=Cyp2a4 PE=2 SV=3	58.876	25.3036	91.9	74.4	115.1	77.8	139	75.6	93.2	94.9	134.4	103.6
Q5SQX6	Cytoplasmic FMR1-interacting protein 2 OS=Mus musculus OX=10090 GN=Cyfip2 PE=1 SV=2	58.027	9.97606	138	81	139.5	85.4	111.5	71.8	74	85.1	125.8	87.8
P18653	Ribosomal protein S6 kinase alpha-1 OS=Mus musculus OX=10090 GN=Rps6ka1 PE=1 SV=1	53.817	16.7127	72.3	87.7	90.3	94	92.4	114.9	113.2	110.4	111.3	113.5
P70403	Protein CASP OS=Mus musculus OX=10090 GN=Cux1 PE=1 SV=2	52.458	19.469	92.1	79.8	88.3	84.9	94.6	117.8	119.3	101.1	118.2	104
P53564	Homeobox protein cut-like 1 OS=Mus musculus OX=10090 GN=Cux1 PE=1 SV=3	50.037	8.71287	102.7	93.7	100	97.2	92.5	103.1	100.9	100.1	100.3	109.5
Q8CGE8	Interferon-activable protein 205-A OS=Mus musculus OX=10090 GN=Ifi205a PE=2 SV=1	49.843	23.7624	24	30.1	25.6	27.1	30.3	159.4	140.9	183.2	182.9	196.5
P05533	Lymphocyte antigen 6A-2/6E-1 OS=Mus musculus OX=10090 GN=Ly6a PE=1 SV=1	49.765	17.1642	92.7	100.6	83.2	82.9	89.4	94.5	96.8	117.1	131.4	111.3
Q8C181	Muscleblind-like protein 2 OS=Mus musculus OX=10090 GN=Mbnl2 PE=2 SV=2	43.322	21.4477	75	98.3	82.5	95.1	79	130.7	113.6	113.1	103.9	108.7
D0QMC3	Myeloid cell nuclear differentiation antigen-like protein OS=Mus musculus OX=10090 GN=Mndal PE=1 SV=1	42.696	11.3383	119.2	73.6	68.8	145.5	69	145.1	81.8	95.3	84.9	116.7
P63147	Ubiquitin-conjugating enzyme E2 B OS=Mus musculus OX=10090 GN=Ube2b PE=1 SV=1	42.099	63.1579	92.4	105.3	96.9	103.5	77.6	107.4	112.5	94.2	101.5	108.8
P50446	Keratin, type II cytoskeletal 6A OS=Mus musculus OX=10090 GN=Krt6a PE=1 SV=3	41.104	16.2749	136.5	84.5	74.9	82.2	121.8	94.7	151.6	91.7	94	68.1
O70131	Ninjurin-1 OS=Mus musculus OX=10090 GN=Ninj1 PE=1 SV=1	39.952	21.7105	124.2	86.9	109.9	77.1	108.9	78.1	100	96.7	117.7	100.5
Q80XQ2	TBC1 domain family member 5 OS=Mus musculus OX=10090 GN=Tbc1d5 PE=1 SV=2	39.159	5.64417	80.8	95.3	84.7	97.5	105	109.6	99.6	111.9	108.1	107.5
A2AS89	Agmatinase, mitochondrial OS=Mus musculus OX=10090 GN=Agmat PE=1 SV=1	38.922	17.3184	108.1	103.8	128	108.5	87.6	97.9	72.8	92	102.3	99.1
Q60872	Eukaryotic translation initiation factor 1A OS=Mus musculus OX=10090 GN=Eif1a PE=2 SV=3	37.736	40.9722	84.3	92.8	90.7	95.2	90.8	113.9	107.5	101.7	113	110.2
Q9CXG3	Peptidyl-prolyl cis-trans isomerase-like 4 OS=Mus musculus OX=10090 GN=Ppil4 PE=1 SV=2	37.371	10.5691	96.5	99.3	101.4	102.1	90	99.9	101.3	104.8	104.1	100.7
Q9Z172	Small ubiquitin-related modifier 3 OS=Mus musculus OX=10090 GN=Sumo3 PE=1 SV=1	36.787	29.0909	90	116.9	108.6	95.1	100.7	101.8	117.7	86.5	89.5	93.2
P59326	YTH domain-containing family protein 1 OS=Mus musculus OX=10090 GN=Ythdf1 PE=1 SV=1	35.936	10.0179	91.6	89.9	94.6	92.9	83.3	113.9	110.2	109.1	105.1	109.2
Q9Z2K1	Keratin, type I cytoskeletal 16 OS=Mus musculus OX=10090 GN=Krt16 PE=1 SV=3	35.601	11.7271	169.7	67.9	68.8	106.8	89.1	120.1	117.3	92.4	105.5	62.5
P97367	Homeobox protein Meis2 OS=Mus musculus OX=10090 GN=Meis2 PE=1 SV=2	33.541	9.43396	90.7	109.5	103.1	108.4	101.3	107.1	102.4	101.8	90.2	85.6
Q8BVR6	RING finger and SPRY domain-containing protein 1 OS=Mus musculus OX=10090 GN=Rspry1 PE=1 SV=1	33.377	5.20833	107.9	89.8	95.7	89.2	115.8	88.9	92.9	105.1	117.4	97.4
Q91VC7	Protein phosphatase 1 regulatory subunit 14A OS=Mus musculus OX=10090 GN=Ppp1r14a PE=1 SV=1	32.942	15.6463	94.6	108.8	88.6	111.4	87.1	122.2	99.7	98.2	93.5	95.9
P50637	Translocator protein OS=Mus musculus OX=10090 GN=Tspo PE=1 SV=1	32.699	18.9349	121.1	82.9	95.4	87.6	97.3	90.7	90.5	103.2	120.1	111.4
P35762	CD81 antigen OS=Mus musculus OX=10090 GN=Cd81 PE=1 SV=2	32.322	18.2203	136.3	97.6	120.1	90.1	116.3	81	85.4	89.4	98.3	85.3
P03893	NADH-ubiquinone oxidoreductase chain 2 OS=Mus musculus OX=10090 GN=Mtnd2 PE=1 SV=2	32.148	9.56522	123.4	95.6	113.7	88	112.9	81.4	83	87.3	119.3	95.2
Q5ND29	Rab-interacting lysosomal protein OS=Mus musculus OX=10090 GN=Rilp PE=1 SV=1	32.029	15.1762	119.6	122.3	112.6	128.4	113.5	88.7	68.4	88.9	72.2	85.4
Q69ZQ1	Myogenesis-regulating glycosidase OS=Mus musculus OX=10090 GN=Myorg PE=1 SV=2	31.914	7.5419	127.1	95	97.3	97.1	116.9	86.1	82	94.1	109.1	95.1
Q9CPW3	39S ribosomal protein L54, mitochondrial OS=Mus musculus OX=10090 GN=Mrpl54 PE=1 SV=1	31.606	42.2222	119.1	135.1	133.3	111.4	113.2	77.2	89.8	67.1	77	76.7
Q9CQN6	Transmembrane protein 14C OS=Mus musculus OX=10090 GN=Tmem14c PE=1 SV=1	31.255	40.3509	154.2	91.8	96.6	88.5	122.6	85.5	93.7	88.4	92.9	85.8
Q9CYF5	RCC1-like G exchanging factor-like protein OS=Mus musculus OX=10090 GN=Rcc1l PE=1 SV=1	31.216	11.2798	104.1	106.8	111	108	96.4	93.5	85	99.8	92.4	103.2
Q9JIY7	N-acetyltransferase 8 OS=Mus musculus OX=10090 GN=Nat8 PE=1 SV=1	30.565	25.9912	122.7	84.8	103.5	90.1	128.1	72.6	82	100.9	112.3	103
Q9CR27	WASH complex subunit 3 OS=Mus musculus OX=10090 GN=Washc3 PE=1 SV=1	30.446	16.4948	92.1	107.8	98.8	98.8	91.6	114.1	101.1	104.3	96.6	94.9
Q8CJG1	Protein argonaute-1 OS=Mus musculus OX=10090 GN=Ago1 PE=1 SV=2	30.378	5.83431	104	83.1	92.2	112	95.6	94.3	97	110.2	109.1	102.6
P63082	V-type proton ATPase 16 kDa proteolipid subunit OS=Mus musculus OX=10090 GN=Atp6v0c PE=1 SV=1	30.346	31.6129	147.7	89	108.4	70	123.6	73.5	114.8	82.6	112.3	78
Q9JKP8	Chromatin accessibility complex protein 1 OS=Mus musculus OX=10090 GN=Chrac1 PE=1 SV=1	29.428	34.8837	93.5	77.9	96.9	106.4	98.3	109.6	97.7	104.1	103.7	111.8
A2AJI0	MAP7 domain-containing protein 1 OS=Mus musculus OX=10090 GN=Map7d1 PE=1 SV=1	29.384	3.90071	68.7	93.5	79.4	89.8	73.7	132.5	112.5	124.9	107.3	117.8
Q9DC33	High mobility group protein 20A OS=Mus musculus OX=10090 GN=Hmg20a PE=1 SV=1	28.708	9.24855	70.5	86.9	75.7	110.3	88.3	129.8	108.3	123.6	104.4	102.3
Q505D7	Optic atrophy 3 protein homolog OS=Mus musculus OX=10090 GN=Opa3 PE=1 SV=1	27.895	27.933	106.9	105	114.6	108	111.8	87.9	90.1	95	96.2	84.6
E9Q1P8	Interferon regulatory factor 2-binding protein 2 OS=Mus musculus OX=10090 GN=Irf2bp2 PE=1 SV=1	27.786	11.5789	82.4	85.6	90.6	101.8	90.2	111.7	104.3	106.4	110.3	116.7
Q91WA6	Sharpin OS=Mus musculus OX=10090 GN=Sharpin PE=1 SV=1	27.72	12.6316	83.8	87	94	95.6	93.6	107.2	101.5	114	110.6	112.9
P35576	Glucose-6-phosphatase catalytic subunit 1 OS=Mus musculus OX=10090 GN=G6pc1 PE=1 SV=2	27.543	7.0028	115.7	77.6	94.8	81.7	137	77	91.9	104.6	118.6	101.1
Q99LJ8	Dehydrodolichyl diphosphate synthase complex subunit Nus1 OS=Mus musculus OX=10090 GN=Nus1 PE=2 SV=1	27.033	11.4478	126.7	108.4	96.5	114.5	114.8	72.7	78.6	95.1	94.7	98
Q6ZWU9	40S ribosomal protein S27 OS=Mus musculus OX=10090 GN=Rps27 PE=1 SV=3	26.981	40.4762	94	97.7	92.1	90.2	101.4	93.2	106.2	104.9	115.4	104.9
Q03963	Interferon-induced, double-stranded RNA-activated protein kinase OS=Mus musculus OX=10090 GN=Eif2ak2 PE=1 SV=2	26.772	7.96117	63.4	98.5	54.1	62.8	54.2	116	110.8	143.9	138.1	158.2
D3Z4S3	Putative peptidyl-tRNA hydrolase PTRHD1 OS=Mus musculus OX=10090 GN=Ptrhd1 PE=1 SV=1	26.621	22.1429	105.6	107.4	92.6	102.4	94.7	101.1	107.2	97.7	85.2	106.2
Q8BXJ9	Transmembrane protein 62 OS=Mus musculus OX=10090 GN=Tmem62 PE=2 SV=1	26.056	8.55365	90.9	66.9	76.1	72.9	110.2	81.1	97.4	125.4	155.5	123.4
Q8VCA0	Solute carrier family 22 member 19 OS=Mus musculus OX=10090 GN=Slc22a19 PE=1 SV=1	25.889	7.80399	105.9	115.2	153.6	89.3	136.7	71.5	70.9	77.1	100.8	79.1
Q6ZWY3	40S ribosomal protein S27-like OS=Mus musculus OX=10090 GN=Rps27l PE=1 SV=3	25.811	40.4762	91.8	95.1	95.4	94	111.8	91.8	101.6	103.6	105.6	109.4
Q8R1T4	UDP-N-acetylglucosamine transporter OS=Mus musculus OX=10090 GN=Slc35a3 PE=2 SV=1	25.71	8.89571	113.3	82.8	113.8	76.2	129.5	70.7	87.1	91.5	134.5	100.7
O70311	Glycylpeptide N-tetradecanoyltransferase 2 OS=Mus musculus OX=10090 GN=Nmt2 PE=1 SV=1	25.703	10.0189	82.7	78	89.2	70.8	95	101	113.9	122.5	130.7	116.2
P70188	Kinesin-associated protein 3 OS=Mus musculus OX=10090 GN=Kifap3 PE=1 SV=1	25.407	5.17024	104.8	78.3	97.2	88.6	104.7	91.3	92	105.4	124.8	112.7
Q62000	Mimecan OS=Mus musculus OX=10090 GN=Ogn PE=1 SV=1	25.339	11.745	111.3	99.7	92.4	114.4	97.9	122.2	93.3	77.6	94	97.3
Q8R3R8	Gamma-aminobutyric acid receptor-associated protein-like 1 OS=Mus musculus OX=10090 GN=Gabarapl1 PE=1 SV=2	25.275	43.5897	121.1	124.3	134.9	120.9	79.7	120.9	79.4	76.2	63.1	79.4
Q9DBG9	Tax1-binding protein 3 OS=Mus musculus OX=10090 GN=Tax1bp3 PE=1 SV=1	25.224	28.2258	68	79.1	84	81.4	68.6	118.8	128.9	115.6	129.5	126.1
Q3TJZ6	Protein FAM98A OS=Mus musculus OX=10090 GN=Fam98a PE=1 SV=1	24.837	11.2621	44.6	68.4	50.3	65.7	139.5	109.2	152.9	107.9	141.1	120.5
Q8K2I1	Protein farnesyltransferase subunit beta OS=Mus musculus OX=10090 GN=Fntb PE=1 SV=1	24.709	8.69565	102.2	89	94.3	91.1	97.9	92.5	94.1	106.2	121.5	111.3
Q9D2U5	N-alpha-acetyltransferase 38, NatC auxiliary subunit OS=Mus musculus OX=10090 GN=Naa38 PE=1 SV=1	24.545	44	89.6	95.7	97.1	104	97.5	113.3	104.9	102.3	92.9	102.7
Q8R088	Golgi phosphoprotein 3-like OS=Mus musculus OX=10090 GN=Golph3l PE=1 SV=1	24.516	7.7193	76.4	80.5	76.1	96	79.6	131	97.4	126.1	115.5	121.4
Q9CZT8	Ras-related protein Rab-3B OS=Mus musculus OX=10090 GN=Rab3b PE=1 SV=1	24.373	24.6575	114.7	93.8	114.1	96.5	127.2	81.6	80.4	86.8	105.3	99.6
Q8BGI5	Peroxisome assembly protein 26 OS=Mus musculus OX=10090 GN=Pex26 PE=1 SV=2	24.304	9.5082	96.3	98.7	100.9	80.8	84	133.3	106.4	86.4	89.2	124
Q8BLY2	Threonine--tRNA ligase 2, cytoplasmic OS=Mus musculus OX=10090 GN=Tars3 PE=1 SV=1	24.248	5.94937	86.7	89.5	92.2	81	128.4	69.5	95.8	109.8	160.5	86.5
Q922K9	Tyrosine-protein kinase FRK OS=Mus musculus OX=10090 GN=Frk PE=1 SV=3	24.163	8.59375	84.1	76.3	92	81.5	89.7	88.5	94.3	128	139.7	125.9
Q99KS6	Manganese-dependent ADP-ribose/CDP-alcohol diphosphatase OS=Mus musculus OX=10090 GN=Adprm PE=1 SV=1	24.029	9.70588	92.8	92.3	95.4	94.6	91.3	109.2	107.8	101.6	113.2	101.9
O35083	1-acyl-sn-glycerol-3-phosphate acyltransferase alpha OS=Mus musculus OX=10090 GN=Agpat1 PE=1 SV=1	23.996	15.4386	102.9	84.2	103.8	94.8	110.8	82.9	109.3	92.7	113.2	105.4
Q9ERN0	Secretory carrier-associated membrane protein 2 OS=Mus musculus OX=10090 GN=Scamp2 PE=1 SV=1	23.927	8.51064	109.6	84.1	101.2	80.3	113.6	78.9	101.4	100	123.1	107.9
Q02956	Protein kinase C zeta type OS=Mus musculus OX=10090 GN=Prkcz PE=1 SV=2	23.64	9.7973	111.2	98.8	116.5	99.1	114.8	93.4	90.3	91.8	94.4	89.7
Q9CPT4	Myeloid-derived growth factor OS=Mus musculus OX=10090 GN=Mydgf PE=1 SV=1	23.247	14.4578	106.6	111.9	111.4	117.7	94.1	94.7	90.1	95.2	87	91.3
Q6PCQ0	IQ domain-containing protein E OS=Mus musculus OX=10090 GN=Iqce PE=1 SV=1	23.245	6.16967	90.7	84.7	90.5	81	115.8	88.7	89.2	85.3	185	89.1
Q9CZX7	Type 2 phosphatidylinositol 4,5-bisphosphate 4-phosphatase OS=Mus musculus OX=10090 GN=Pip4p2 PE=1 SV=1	23.22	13.6187	98.2	80.3	95.6	100.2	101.1	91.2	86	114.8	118.1	114.5
Q8CI43	Myosin light chain 6B OS=Mus musculus OX=10090 GN=Myl6b PE=1 SV=1	23.061	23.1884	92.7	89.3	104	101	104.8	106.1	96	102.1	109.1	94.9
P63034	Cytohesin-2 OS=Mus musculus OX=10090 GN=Cyth2 PE=1 SV=2	23	22	82.7	75.5	80.8	79.3	86.9	104.7	107.7	135.6	124.5	122.4
P02463	Collagen alpha-1(IV) chain OS=Mus musculus OX=10090 GN=Col4a1 PE=1 SV=4	22.795	1.25824	89.6	83.8	96.8	90.8	91.8	105.5	101.9	101.8	118.8	119.2
Q3TUH1	Phosphatidate cytidylyltransferase, mitochondrial OS=Mus musculus OX=10090 GN=Tamm41 PE=1 SV=2	22.747	11.8694	97.8	108.8	94.9	100	127.3	82.1	106.4	91.1	101.9	89.7
P06795	ATP-dependent translocase ABCB1 OS=Mus musculus OX=10090 GN=Abcb1b PE=1 SV=1	22.733	3.36991	76.7	92.7	108	72.2	117.4	86.6	117.3	95	127.3	106.8
P60605	Ubiquitin-conjugating enzyme E2 G2 OS=Mus musculus OX=10090 GN=Ube2g2 PE=1 SV=1	22.667	23.6364	135.7	81.8	118.3	110.8	89.4	99.5	86	93.3	97.3	87.8
P56371	Ras-related protein Rab-4A OS=Mus musculus OX=10090 GN=Rab4a PE=1 SV=2	22.599	19.7248	104.9	93.8	103.5	85.8	111.1	90.7	102	102.9	106	99.3
Q80ZQ9	Protein Abitram OS=Mus musculus OX=10090 GN=Abitram PE=1 SV=2	22.534	14.5078	82.2	99.3	102.2	94.2	109.4	101.9	105.6	99.2	102	104.1
Q9CQS2	H/ACA ribonucleoprotein complex subunit 3 OS=Mus musculus OX=10090 GN=Nop10 PE=3 SV=1	22.383	45.3125	95.8	116.1	97.4	112.3	105.6	104.5	102	90	88.6	87.7
O35099	Mitogen-activated protein kinase kinase kinase 5 OS=Mus musculus OX=10090 GN=Map3k5 PE=1 SV=3	22.14	2.89855	99.9	88.6	97.3	93	105.7	96.6	103.5	103.7	110	101.7
Q9CPW2	Ferredoxin-2, mitochondrial OS=Mus musculus OX=10090 GN=Fdx2 PE=1 SV=1	21.872	17.8161	103.2	120	113.6	115.9	103.5	101.8	93.5	79.7	85.5	83.3
Q9CQU5	ZW10 interactor OS=Mus musculus OX=10090 GN=Zwint PE=1 SV=1	21.825	12.6984	61.8	68.6	61.8	74.3	74.8	136.6	151	116.9	115.9	138.3
Q8BWR2	PITH domain-containing protein 1 OS=Mus musculus OX=10090 GN=Pithd1 PE=1 SV=1	21.706	18.9573	83.6	84.4	90.9	103.3	94.5	116	112.4	106.3	100.7	108
O88697	Serine/threonine-protein kinase 16 OS=Mus musculus OX=10090 GN=Stk16 PE=1 SV=3	21.459	9.83607	96.3	81.4	91.6	90.2	98.8	89.8	76.4	136.1	123.9	115.6
P56695	Wolframin OS=Mus musculus OX=10090 GN=Wfs1 PE=1 SV=1	21.263	3.37079	87.4	74.6	86.8	77.3	91	86.6	96.6	145.5	134.3	119.9
P62315	Small nuclear ribonucleoprotein Sm D1 OS=Mus musculus OX=10090 GN=Snrpd1 PE=1 SV=1	21.094	27.7311	94.3	94.4	105.1	108.1	92.8	108.4	93.7	96.5	102.7	104.1
Q9ERL9	Guanylate cyclase soluble subunit alpha-1 OS=Mus musculus OX=10090 GN=Gucy1a1 PE=1 SV=2	21.041	6.36758	112.3	78.3	86.5	76.5	105.3	88.7	105.9	111.4	124.2	110.8
O35680	28S ribosomal protein S12, mitochondrial OS=Mus musculus OX=10090 GN=Mrps12 PE=2 SV=1	21.022	23.741	94.7	90.1	98	105.7	103.9	101.2	103.1	102.1	101.9	99.4
Q8R1I1	Cytochrome b-c1 complex subunit 9 OS=Mus musculus OX=10090 GN=Uqcr10 PE=1 SV=1	20.974	37.5	99.7	112.8	103.5	114.1	118.2	94.5	88.7	94.4	81.5	92.6
Q9Z306	Solute carrier family 22 member 4 OS=Mus musculus OX=10090 GN=Slc22a4 PE=1 SV=1	20.879	5.60579	123.8	99	158.7	75.8	140.8	61.4	91.6	72.3	103	73.8
Q9Z2D8	Methyl-CpG-binding domain protein 3 OS=Mus musculus OX=10090 GN=Mbd3 PE=1 SV=1	20.855	14.0351	80.4	92.7	92.1	102.3	93	112.5	106.3	105.3	104.7	110.8
O35730	E3 ubiquitin-protein ligase RING1 OS=Mus musculus OX=10090 GN=Ring1 PE=1 SV=2	20.765	17.9803	94.3	118.1	107.1	83.5	84.5	100	95.5	100.7	99.1	117.3
Q5DU25	IQ motif and SEC7 domain-containing protein 2 OS=Mus musculus OX=10090 GN=Iqsec2 PE=1 SV=3	20.762	2.84168	101.6	89.2	102.5	105.2	97	106.4	84.9	112.1	98	102.9
Q8VHJ5	Serine/threonine-protein kinase MARK1 OS=Mus musculus OX=10090 GN=Mark1 PE=1 SV=2	20.532	7.2956	82.9	91.5	87.6	95.1	98.6	108.5	100	110.9	109.9	115.3
P41593	Parathyroid hormone/parathyroid hormone-related peptide receptor OS=Mus musculus OX=10090 GN=Pth1r PE=1 SV=2	20.519	7.61421	164	91.3	126.8	85	128.8	53.8	76.6	82.6	105.1	85.9
Q0KL02	Triple functional domain protein OS=Mus musculus OX=10090 GN=Trio PE=1 SV=3	20.504	1.16054	99.8	87	93.4	97.6	109.6	89.8	94.4	98.4	121.2	109
Q8BI72	CDKN2A-interacting protein OS=Mus musculus OX=10090 GN=Cdkn2aip PE=1 SV=1	20.392	5.15098	80.9	100	82.5	100.7	85.7	124.4	101.1	123.9	95.4	105.5
P27889	Hepatocyte nuclear factor 1-beta OS=Mus musculus OX=10090 GN=Hnf1b PE=1 SV=2	20.318	6.09319	97.8	98.9	112.8	109.1	98.3	98.3	100.3	98.7	91.5	94.3
Q8BZF8	Phosphoglucomutase-like protein 5 OS=Mus musculus OX=10090 GN=Pgm5 PE=1 SV=2	20.3	7.40741	97.8	101.1	90.2	97.3	88.1	106.1	107.9	110	105.7	95.8
Q3UV17	Keratin, type II cytoskeletal 2 oral OS=Mus musculus OX=10090 GN=Krt76 PE=1 SV=1	20.277	6.90236	145	66.3	65.6	282.5	53.4	86.2	71.3	75.2	93.2	61.3
P70271	PDZ and LIM domain protein 4 OS=Mus musculus OX=10090 GN=Pdlim4 PE=1 SV=3	20.173	11.8182	92.5	88.6	96.7	99.4	94.5	114	98.2	104.9	105	106.3
O08740	DNA-directed RNA polymerase II subunit RPB11 OS=Mus musculus OX=10090 GN=Polr2j PE=1 SV=1	20.144	24.7863	76.1	94.2	88.6	98	92.9	116.7	133.5	99.7	99.6	100.8
Q91XV3	Brain acid soluble protein 1 OS=Mus musculus OX=10090 GN=Basp1 PE=1 SV=3	20.115	16.3717	57.1	69.6	53.7	58.1	232.7	100.4	120.9	81.1	139.2	87.2
Q9Z1K8	Y+L amino acid transporter 1 OS=Mus musculus OX=10090 GN=Slc7a7 PE=1 SV=1	20.112	6.66667	105	87.1	109.2	82.2	118.5	85.4	102.1	89.9	118	102.6
Q8CIM8	Integrator complex subunit 4 OS=Mus musculus OX=10090 GN=Ints4 PE=1 SV=1	20.051	4.25311	90.3	84.2	93.4	88.3	93.8	96.4	102.7	116.3	124.1	110.6
P61080	Ubiquitin-conjugating enzyme E2 D1 OS=Mus musculus OX=10090 GN=Ube2d1 PE=1 SV=1	20.029	38.0952	74.7	98.3	89.4	99.5	98.9	106.5	96.5	109.8	122.9	103.5
Q61072	Disintegrin and metalloproteinase domain-containing protein 9 OS=Mus musculus OX=10090 GN=Adam9 PE=1 SV=2	19.898	4.3787	86	77.6	86.2	79.7	92.7	98.2	118.3	113.2	133.4	114.7
Q9EQH4	Transcription initiation factor TFIID subunit 8 OS=Mus musculus OX=10090 GN=Taf8 PE=2 SV=1	19.761	12.6623	104.6	91	100.5	103.7	94.7	108.5	112.3	97.2	101.4	86
Q8VHC3	Selenoprotein M OS=Mus musculus OX=10090 GN=Selenom PE=1 SV=3	19.689	20.6897	96.8	101.3	121.3	113.9	107.5	94.2	95.7	90.6	86.2	92.4
Q8K0V2	DCN1-like protein 3 OS=Mus musculus OX=10090 GN=Dcun1d3 PE=2 SV=1	19.598	11.8421	111.3	94.4	118.4	100.4	111.9	83.7	106.7	78.1	100.7	94.5
Q9JJF9	Signal peptide peptidase-like 2A OS=Mus musculus OX=10090 GN=Sppl2a PE=1 SV=2	19.544	4.78011	91.7	67.3	74.4	57.2	83.3	94.8	134	115.3	157	125
Q99LU0	Charged multivesicular body protein 1b-1 OS=Mus musculus OX=10090 GN=Chmp1b1 PE=1 SV=1	19.508	22.1106	87.8	101.9	91.3	102.9	90.5	122.4	113.7	102.1	92.3	95.1
P14434	H-2 class II histocompatibility antigen, A-B alpha chain OS=Mus musculus OX=10090 GN=H2-Aa PE=1 SV=2	19.476	22.2656	76.8	123	71.2	74.2	78.2	85.4	101.9	97.6	164.1	127.6
Q60575	Kinesin-like protein KIF1B OS=Mus musculus OX=10090 GN=Kif1b PE=1 SV=2	19.333	2.36784	95.2	83.6	81.5	108.1	72.3	123.3	113.6	97.6	105.1	119.6
P0C605	cGMP-dependent protein kinase 1 OS=Mus musculus OX=10090 GN=Prkg1 PE=1 SV=1	19.239	4.769	97.7	86.5	92.8	85.8	110.4	96.7	100.4	100.1	117.8	111.9
Q8BYZ1	ABI gene family member 3 OS=Mus musculus OX=10090 GN=Abi3 PE=1 SV=3	19.15	9.53678	87.1	92.5	83.2	104.4	82.4	128.8	115.5	101.4	95.5	109.3
Q3KNJ2	Non-homologous end-joining factor 1 OS=Mus musculus OX=10090 GN=Nhej1 PE=1 SV=1	19.086	13.2203	78.4	87.6	84.1	83.4	97.9	110.7	93.5	114.4	129.4	120.9
Q91VS8	FERM, ARHGEF and pleckstrin domain-containing protein 2 OS=Mus musculus OX=10090 GN=Farp2 PE=1 SV=2	19.053	4.41315	96.6	85.6	98.7	80.6	118.2	82.2	96.1	104.1	133.7	104.2
Q91WS7	DEP domain-containing protein 7 OS=Mus musculus OX=10090 GN=Depdc7 PE=2 SV=1	19.012	5.47945	112.8	98.4	111.1	107	105.1	88.5	96	87.7	106.8	86.7
Q8R2L5	28S ribosomal protein S18c, mitochondrial OS=Mus musculus OX=10090 GN=Mrps18c PE=1 SV=1	18.982	25.8741	102.7	109.5	110.4	109.8	101.3	95.1	100.7	92.9	91.2	86.4
P62322	U6 snRNA-associated Sm-like protein LSm5 OS=Mus musculus OX=10090 GN=Lsm5 PE=3 SV=2	18.933	31.8681	97.4	103.5	94.5	101.6	86.3	119	113.9	94.5	91.6	97.7
Q61165	Sodium/hydrogen exchanger 1 OS=Mus musculus OX=10090 GN=Slc9a1 PE=1 SV=1	18.873	4.14634	85.5	88.7	89.5	93.6	101.9	99	109.7	100.7	110.3	121.3
P19426	Negative elongation factor E OS=Mus musculus OX=10090 GN=Nelfe PE=1 SV=2	18.756	6.93333	80	96.2	93.6	98.7	86.4	117	115.3	101.2	102.6	109
Q91X96	Guanine nucleotide exchange factor MSS4 OS=Mus musculus OX=10090 GN=Rabif PE=1 SV=1	18.717	34.1463	85.8	100.9	85.4	101.2	86.6	111.7	102.3	107.8	99.9	118.4
Q91WJ7	SPATS2-like protein OS=Mus musculus OX=10090 GN=Spats2l PE=2 SV=2	18.675	7.34767	119.4	96.6	89.8	109.5	102	82.9	93.6	94.1	108.8	103.5
O35074	Prostacyclin synthase OS=Mus musculus OX=10090 GN=Ptgis PE=1 SV=1	18.667	7.98403	103.3	85.1	107	86.4	103.4	79.3	97.5	112.8	123.7	101.4
Q6PD03	Serine/threonine-protein phosphatase 2A 56 kDa regulatory subunit alpha isoform OS=Mus musculus OX=10090 GN=Ppp2r5a PE=1 SV=1	18.592	5.55556	94.8	93.3	99	67.9	111.7	81.8	106.3	110.9	129.4	104.8
Q9DBH0	NEDD4-like E3 ubiquitin-protein ligase WWP2 OS=Mus musculus OX=10090 GN=Wwp2 PE=1 SV=1	18.583	4.02299	95.5	83.4	96.5	84.7	116.3	89.9	99.1	104.8	125.9	103.9
Q9Z1E3	NF-kappa-B inhibitor alpha OS=Mus musculus OX=10090 GN=Nfkbia PE=1 SV=2	18.56	13.3758	74.3	79.7	73.5	80.1	71.9	112.5	127.9	123.7	127.6	128.7
E9Q4N7	AT-rich interactive domain-containing protein 1B OS=Mus musculus OX=10090 GN=Arid1b PE=1 SV=1	18.535	3.07487	88.2	99.5	92	95.8	95.4	102.8	96.1	114.6	107.8	107.9
Q8BL80	Rho GTPase-activating protein 22 OS=Mus musculus OX=10090 GN=Arhgap22 PE=1 SV=2	18.515	4.41595	93.1	80.5	112.7	102.7	110.8	102.2	94.7	93.6	107.1	102.6
O09117	Synaptophysin-like protein 1 OS=Mus musculus OX=10090 GN=Sypl1 PE=1 SV=2	18.305	4.21456	108.2	92	103.4	80.5	121.3	82.8	106.6	94	115.4	95.8
Q8VC52	RNA-binding protein with multiple splicing 2 OS=Mus musculus OX=10090 GN=Rbpms2 PE=1 SV=1	18.296	23.7864	99.3	98.8	101.6	105.1	95	93.4	98.5	99.9	101.8	106.6
Q69ZF7	Metal transporter CNNM4 OS=Mus musculus OX=10090 GN=Cnnm4 PE=1 SV=2	18.251	5.31777	108.3	92.5	102.9	89.9	108.1	88.6	100.2	97.5	106.6	105.4
Q8BW00	Probable peptidyl-tRNA hydrolase OS=Mus musculus OX=10090 GN=Ptrh1 PE=2 SV=1	18.22	22.549	89.9	94.7	101.4	107.4	88.1	96.7	85.1	115.7	100.7	120.2
Q9DCL4	12S rRNA N4-methylcytidine methyltransferase OS=Mus musculus OX=10090 GN=Mettl15 PE=1 SV=2	18.218	6.89655	103.9	114.2	104.5	126	96.7	96.1	90.8	81.5	88.1	98.2
Q9CQP3	Coiled-coil-helix-coiled-coil-helix domain-containing protein 5 OS=Mus musculus OX=10090 GN=Chchd5 PE=1 SV=1	18.176	23.6364	96.1	96.1	105.6	114.1	93.6	105	90.7	101.1	94	103.7
P60904	DnaJ homolog subfamily C member 5 OS=Mus musculus OX=10090 GN=Dnajc5 PE=1 SV=1	18.163	16.1616	101.7	112.4	88.3	86.6	109.6	88.2	108.4	97.9	105	101.9
Q9D7V9	N-acylethanolamine-hydrolyzing acid amidase OS=Mus musculus OX=10090 GN=Naaa PE=1 SV=2	18.133	8.83978	85.5	106.6	83.7	104.4	102.6	113	118.1	93.6	94.1	98.3
Q9CQK7	RWD domain-containing protein 1 OS=Mus musculus OX=10090 GN=Rwdd1 PE=1 SV=1	18.112	4.93827	82.6	97.6	89.9	99.3	95.1	110	106.5	111.7	98.6	108.7
Q9CQE6	Histone chaperone ASF1A OS=Mus musculus OX=10090 GN=Asf1a PE=1 SV=1	18.066	17.6471	95.5	85.6	94.5	89.6	100.1	108.9	97.6	112.2	106.7	109.3
Q9DBQ7	Protein-associating with the carboxyl-terminal domain of ezrin OS=Mus musculus OX=10090 GN=Scyl3 PE=1 SV=3	17.994	4.35374	109	82.1	94.4	85	104.1	88.7	90.7	106.9	132.7	106.4
Q9R0H2	Endomucin OS=Mus musculus OX=10090 GN=Emcn PE=1 SV=1	17.961	6.13027	96.8	80.7	98.6	91.5	93.2	94.1	112.5	123	105.7	103.8
O88819	4-galactosyl-N-acetylglucosaminide 3-alpha-L-fucosyltransferase 9 OS=Mus musculus OX=10090 GN=Fut9 PE=1 SV=1	17.941	5.01393	131.2	108.4	108	103.7	127.8	81.9	84.2	82.4	88.5	83.9
Q3UYV9	Nuclear cap-binding protein subunit 1 OS=Mus musculus OX=10090 GN=Ncbp1 PE=1 SV=2	17.891	3.16456	108.4	86.7	109.9	122.9	81.9	90.6	71	118.7	89.4	120.7
Q04646	Sodium/potassium-transporting ATPase subunit gamma OS=Mus musculus OX=10090 GN=Fxyd2 PE=1 SV=2	17.858	21.4286	143.6	118.6	161.6	80.5	99.3	81.4	87.2	70.4	81.5	76
P56379	ATP synthase subunit ATP5MJ, mitochondrial OS=Mus musculus OX=10090 GN=Atp5mj PE=1 SV=1	17.852	34.4828	117.3	107.8	126	94.3	123.4	72.3	100.6	81.7	90.9	85.7
Q8BKY8	Transcription termination factor 2, mitochondrial OS=Mus musculus OX=10090 GN=Mterf2 PE=1 SV=1	17.834	7.53247	115.2	107.1	106.5	97.8	119.1	81.9	89.1	90	103.9	89.4
Q8K248	4-hydroxyphenylpyruvate dioxygenase-like protein OS=Mus musculus OX=10090 GN=Hpdl PE=2 SV=1	17.818	15.3639	90.9	107.8	101.7	98.4	94.9	94.2	92.1	105.1	108.4	106.4
P60603	Reactive oxygen species modulator 1 OS=Mus musculus OX=10090 GN=Romo1 PE=2 SV=1	17.797	40.5063	106.8	98.5	101.6	103.6	113.8	94.2	91.5	94.9	89.8	105.3
Q80SU6	Sodium-dependent phosphate transport protein 2C OS=Mus musculus OX=10090 GN=Slc34a3 PE=1 SV=2	17.55	6.3228	127.7	104.6	147.2	101.2	136	80.1	77.5	70.5	77.3	77.9
Q3UR97	Sorting nexin-21 OS=Mus musculus OX=10090 GN=Snx21 PE=1 SV=1	17.484	8.53994	74	85.1	95.8	98.6	111.1	110.5	107.4	105.9	102.9	108.7
O88843	Death domain-containing protein CRADD OS=Mus musculus OX=10090 GN=Cradd PE=1 SV=2	17.434	18.593	107.8	92.8	93.7	98.1	98.8	103.1	97.2	100.1	107.6	100.7
Q9QXC1	Fetuin-B OS=Mus musculus OX=10090 GN=Fetub PE=1 SV=1	17.364	6.95876	53.4	91.1	63.4	82.3	58.7	198.2	152.9	80.5	94.4	125.1
Q0KL01	UBX domain-containing protein 2B OS=Mus musculus OX=10090 GN=Ubxn2b PE=1 SV=2	17.343	9.36556	123.2	119.2	120.7	104.3	117.9	71.1	100.5	78.4	78.2	86.8
Q7TQH7	Low-density lipoprotein receptor-related protein 10 OS=Mus musculus OX=10090 GN=Lrp10 PE=2 SV=2	17.338	6.73212	113.1	86.7	116.8	110.9	105.2	82.6	96.5	88	101.1	99.2
P56393	Cytochrome c oxidase subunit 7B, mitochondrial OS=Mus musculus OX=10090 GN=Cox7b PE=3 SV=1	17.297	10	126.4	102.7	114.7	102.1	118.7	93.5	93.6	82.8	89	76.6
Q8C7G5	Apolipoprotein A-V OS=Mus musculus OX=10090 GN=Apoa5 PE=1 SV=1	17.169	7.33696	80.9	67.1	82.5	82.2	81.9	127	102.4	113.7	135.4	127
A2AI05	NADPH-dependent diflavin oxidoreductase 1 OS=Mus musculus OX=10090 GN=Ndor1 PE=2 SV=1	17.159	5.01672	110.4	83.9	93.6	88.8	104.9	90	89.8	107.1	121.6	109.8
Q3UH06	Ras-responsive element-binding protein 1 OS=Mus musculus OX=10090 GN=Rreb1 PE=1 SV=2	17.106	2.35294	64.1	97.6	104	113.5	96.1	101.5	107.7	109.9	93.6	112.2
Q9D7S7	60S ribosomal protein L22-like 1 OS=Mus musculus OX=10090 GN=Rpl22l1 PE=1 SV=1	16.92	26.2295	85.2	96.7	92.3	100.3	83.3	120.3	98.4	110.2	101.2	112.1
Q9CQ89	Protein CutA OS=Mus musculus OX=10090 GN=Cuta PE=1 SV=3	16.91	18.0791	96.2	92.6	95.2	109	99.5	105.1	97.4	107.4	88.8	108.6
Q65Z40	Wings apart-like protein homolog OS=Mus musculus OX=10090 GN=Wapl PE=1 SV=2	16.842	2.91667	89.3	82.4	94.6	86.5	89	92	92.4	117.2	122.4	134.2
P02798	Metallothionein-2 OS=Mus musculus OX=10090 GN=Mt2 PE=1 SV=2	16.813	34.4262	11.4	12.4	15.7	17	16.7	254.7	246.8	145.1	129.9	150.2
Q9D198	Pre-mRNA-splicing factor SYF2 OS=Mus musculus OX=10090 GN=Syf2 PE=2 SV=1	16.75	7.85124	99.7	110.3	109.7	104.9	81.9	110.3	124.1	83.3	82.2	93.5
Q8BGT8	Phytanoyl-CoA hydroxylase-interacting protein-like OS=Mus musculus OX=10090 GN=Phyhipl PE=1 SV=1	16.745	11.7333	90.3	98.9	90.8	99.2	91.7	119	120.6	96.5	97.1	96.1
Q9ERV1	Probable E3 ubiquitin-protein ligase makorin-2 OS=Mus musculus OX=10090 GN=Mkrn2 PE=1 SV=2	16.72	6.49038	104.8	109.1	120.9	101.2	106.3	93.5	97.1	88.9	88.5	89.6
Q91Z31	Polypyrimidine tract-binding protein 2 OS=Mus musculus OX=10090 GN=Ptbp2 PE=1 SV=2	16.691	7.15631	81.7	99.6	89.1	92.7	92.6	108	111	101.7	105.3	118.5
P61219	DNA-directed RNA polymerases I, II, and III subunit RPABC2 OS=Mus musculus OX=10090 GN=Polr2f PE=2 SV=1	16.594	25.9843	71.9	88.5	79.8	93.2	86.4	114	118.9	118	103.6	125.7
P41778	Pre-B-cell leukemia transcription factor 1 OS=Mus musculus OX=10090 GN=Pbx1 PE=1 SV=2	16.58	7.67442	183.8	89.6	88.3	171.4	78.1	84.1	72.4	80.3	67.8	84.3
O35613	Death domain-associated protein 6 OS=Mus musculus OX=10090 GN=Daxx PE=1 SV=1	16.538	4.19486	63.5	73.3	66.4	68.9	66.4	138.5	128	128.5	134.8	131.9
Q61586	Glycerol-3-phosphate acyltransferase 1, mitochondrial OS=Mus musculus OX=10090 GN=Gpam PE=1 SV=2	16.452	4.35308	119.6	73.6	111.8	94	107	87	77.8	109.8	113.8	105.6
Q9DC53	Copine-8 OS=Mus musculus OX=10090 GN=Cpne8 PE=2 SV=3	16.375	5.71924	62.7	69.3	70.7	83.1	71.5	140.5	110.8	137.5	105.8	148.1
P00687	Alpha-amylase 1 OS=Mus musculus OX=10090 GN=Amy1 PE=1 SV=2	16.37	9.39335	108.8	106.8	96.6	135.1	101	82.1	95.1	89.5	77.8	107.2
P28828	Receptor-type tyrosine-protein phosphatase mu OS=Mus musculus OX=10090 GN=Ptprm PE=1 SV=2	16.356	2.47934	105.5	99.8	100.4	104.3	99.1	114	88.1	97.9	98.3	92.6
A2RSQ0	DENN domain-containing protein 5B OS=Mus musculus OX=10090 GN=Dennd5b PE=1 SV=2	16.286	3.61068	120.8	85	104.9	106.4	92.7	98.3	93.9	93.4	111.1	93.5
Q3UGS4	Mapk-regulated corepressor-interacting protein 1 OS=Mus musculus OX=10090 GN=Mcrip1 PE=1 SV=1	16.217	27.8351	73.8	93.6	90.3	91.1	84.7	109.5	111.1	117.8	111.7	116.5
Q99JH1	Ribonuclease P protein subunit p25-like protein OS=Mus musculus OX=10090 GN=Rpp25l PE=1 SV=1	16.215	19.6319	76.6	93	84.5	87.2	79	134.3	109.3	111.4	107.5	117
O54890	Integrin beta-3 OS=Mus musculus OX=10090 GN=Itgb3 PE=1 SV=2	16.207	3.30368	65.3	95.1	101.4	69.3	91.3	103.6	110.5	115.3	115.2	133
Q9JI08	Bridging integrator 3 OS=Mus musculus OX=10090 GN=Bin3 PE=1 SV=1	16.034	11.4625	78	87.8	88	91	78.4	129.6	114.6	118.1	104.3	110.1
Q61735	Leukocyte surface antigen CD47 OS=Mus musculus OX=10090 GN=Cd47 PE=1 SV=2	15.968	8.91089	112.1	93.2	91.1	67.2	108.3	76.3	117.1	96	138.4	100.3
O88842	FYVE, RhoGEF and PH domain-containing protein 3 OS=Mus musculus OX=10090 GN=Fgd3 PE=1 SV=1	15.954	7.91269	100.4	87.8	99.3	107.5	87.2	117.3	77.4	102	111.6	109.5
Q8C3X8	Lipase maturation factor 2 OS=Mus musculus OX=10090 GN=Lmf2 PE=1 SV=1	15.924	3.56125	104	89.6	111.7	82.2	115.9	67.8	92.5	107.8	124.3	104.1
Q4KML4	Costars family protein ABRACL OS=Mus musculus OX=10090 GN=Abracl PE=1 SV=1	15.884	27.1605	83.9	85.8	83.9	93.9	84	120.6	108	112.7	107.5	119.7
Q8BUV8	Protein GPR107 OS=Mus musculus OX=10090 GN=Gpr107 PE=1 SV=2	15.815	7.98548	95.6	86.8	95.7	87.3	100.1	86.3	98.4	108.7	133.2	107.9
Q6P4S8	Integrator complex subunit 1 OS=Mus musculus OX=10090 GN=Ints1 PE=1 SV=2	15.76	1.54897	93	85.3	94.2	99.7	93.9	103.7	90.9	102.3	133.8	103.2
Q6GV12	3-ketodihydrosphingosine reductase OS=Mus musculus OX=10090 GN=Kdsr PE=1 SV=1	15.654	7.53012	98	106	93.5	94.7	102.3	95.8	101	103.6	104.1	101
Q00262	Syntaxin-2 OS=Mus musculus OX=10090 GN=Stx2 PE=1 SV=1	15.646	10.7266	94.9	86.7	93.5	84.3	103.1	97.5	96.1	115.2	118.9	109.7
Q3TIR3	Synembryn-A OS=Mus musculus OX=10090 GN=Ric8a PE=1 SV=2	15.624	4.5283	93	76.6	81.7	72	83.9	95	118	125.7	130.6	123.4
Q9JJ00	Phospholipid scramblase 1 OS=Mus musculus OX=10090 GN=Plscr1 PE=1 SV=1	15.619	8.23171	90.4	79.8	90.5	79.3	92.9	101.2	108	106.3	130.8	120.7
D3Z6Q9	Bridging integrator 2 OS=Mus musculus OX=10090 GN=Bin2 PE=1 SV=1	15.616	6.33947	59.1	99.2	108.8	108.3	92	141.3	107.1	84.1	86.3	113.7
Q8BG30	Negative elongation factor A OS=Mus musculus OX=10090 GN=Nelfa PE=1 SV=1	15.573	6.03774	89.6	93.7	95.3	95.4	94.5	107.8	99.7	110.3	102.3	111.2
Q5FWH2	Putative E3 ubiquitin-protein ligase UNKL OS=Mus musculus OX=10090 GN=Unkl PE=2 SV=2	15.568	7.56534	79.2	94.5	88.7	109	95.8	126	109.7	99	96.3	101.7
P11680	Properdin OS=Mus musculus OX=10090 GN=Cfp PE=1 SV=2	15.471	5.81897	85.9	116	81.1	92.3	83.9	161.9	122.1	82.1	73.8	100.9
Q9CZP0	Ufm1-specific protease 1 OS=Mus musculus OX=10090 GN=Ufsp1 PE=1 SV=1	15.465	16.5899	87.5	94.6	93.1	92.5	104.4	100.8	99.1	112.7	107.6	107.6
Q99PW4	EKC/KEOPS complex subunit Tp53rk OS=Mus musculus OX=10090 GN=Tp53rk PE=2 SV=1	15.456	9.01639	84.1	90.8	93.1	100.8	93	107.9	90.4	117.8	107.4	114.7
Q8VE62	Polyadenylate-binding protein-interacting protein 1 OS=Mus musculus OX=10090 GN=Paip1 PE=1 SV=1	15.372	6.75	136.8	95.7	111	90.2	116.4	79.1	99.7	79.8	101.4	89.8
Q9D3B1	Very-long-chain (3R)-3-hydroxyacyl-CoA dehydratase 2 OS=Mus musculus OX=10090 GN=Hacd2 PE=1 SV=1	15.359	4.72441	121.8	79.2	109.6	76.5	126.8	65.4	101.9	94.9	130.8	93.4
P11835	Integrin beta-2 OS=Mus musculus OX=10090 GN=Itgb2 PE=1 SV=2	15.288	6.22568	67.6	77.8	62	86.7	120.7	120	135.5	100.2	125.2	104.3
P62257	Ubiquitin-conjugating enzyme E2 H OS=Mus musculus OX=10090 GN=Ube2h PE=1 SV=1	15.252	12.5683	109.8	114.5	105.1	107.5	107.8	90.8	89	94.6	91.2	89.6
Q62141	Paired amphipathic helix protein Sin3b OS=Mus musculus OX=10090 GN=Sin3b PE=1 SV=2	15.108	3.00546	89.2	82.3	91.7	94.8	95.5	116.8	107.2	105.8	113.4	103.3
Q99JV5	StAR-related lipid transfer protein 4 OS=Mus musculus OX=10090 GN=Stard4 PE=1 SV=1	15.097	20.5357	102.3	100.7	103	109.7	111.9	96.8	86.3	89.5	96.1	103.6
Q3TAP4	AP-5 complex subunit beta-1 OS=Mus musculus OX=10090 GN=Ap5b1 PE=1 SV=1	15.094	3.3105	91.7	81.3	82.1	67.6	103.6	89.6	100	124.2	146.9	113
A2RSY6	TRMT1-like protein OS=Mus musculus OX=10090 GN=Trmt1l PE=1 SV=1	15.076	5.76923	101.1	85.1	99.9	97.4	100.6	90.1	83	125.9	104.3	112.6
Q80X71	Transmembrane protein 106B OS=Mus musculus OX=10090 GN=Tmem106b PE=1 SV=1	15.052	8.72727	101	90.3	105.2	91.4	91	107.3	99.6	101.4	106.5	106.3
Q8BNU0	Armadillo repeat-containing protein 6 OS=Mus musculus OX=10090 GN=Armc6 PE=1 SV=1	14.972	4.91453	97	102.8	90.6	96.3	99.5	97	97.2	107.6	104	108
Q8BPB0	MOB kinase activator 1B OS=Mus musculus OX=10090 GN=Mob1b PE=1 SV=3	14.934	12.037	120.3	90.1	101.8	89.3	110.5	79.5	89.1	101.2	116	102.1
P45481	Histone lysine acetyltransferase CREBBP OS=Mus musculus OX=10090 GN=Crebbp PE=1 SV=3	14.888	1.47481	80.6	89.1	84.2	99.5	86.5	117.7	117.5	104.4	105.2	115.3
Q3UMW7	MAP kinase-activated protein kinase 3 OS=Mus musculus OX=10090 GN=Mapkapk3 PE=1 SV=2	14.887	16.1458	136.8	99	88.8	92.3	91.2	117	91.9	100.1	80.5	102.3
Q99N57	RAF proto-oncogene serine/threonine-protein kinase OS=Mus musculus OX=10090 GN=Raf1 PE=1 SV=2	14.865	5.24691	77.9	83.8	82.9	85	86.4	99.7	103.9	131.6	126.7	122.2
Q01237	3-hydroxy-3-methylglutaryl-coenzyme A reductase OS=Mus musculus OX=10090 GN=Hmgcr PE=1 SV=3	14.86	3.94589	171.5	89.3	89.9	190.8	95.7	81.9	72.1	64.9	77.2	66.7
Q9D0P8	Intraflagellar transport protein 27 homolog OS=Mus musculus OX=10090 GN=Ift27 PE=1 SV=1	14.842	17.7419	113.4	85	83.7	101.1	89.4	108	93.8	103.9	105.1	116.8
Q3UPH7	Rho guanine nucleotide exchange factor 40 OS=Mus musculus OX=10090 GN=Arhgef40 PE=1 SV=1	14.832	2.30719	114	79.8	118.9	106.6	86.8	89.8	78.5	94.2	128.2	103.2
Q8BZA9	Fructose-2,6-bisphosphatase TIGAR OS=Mus musculus OX=10090 GN=Tigar PE=1 SV=1	14.791	11.8959	89.9	85.5	93.4	95.4	97.2	107.1	85.8	101.5	132.8	111.3
Q8VHI6	Wiskott-Aldrich syndrome protein family member 3 OS=Mus musculus OX=10090 GN=Wasf3 PE=1 SV=1	14.748	7.38523	96.7	120.1	113.7	121	85.1	103.3	77.3	110.2	89.8	82.9
Q9DBB5	Eukaryotic translation initiation factor 4E type 3 OS=Mus musculus OX=10090 GN=Eif4e3 PE=1 SV=1	14.738	19.8068	90.1	81.4	94.6	100.5	94.2	109	97.2	102.2	109.4	121.1
Q6PCM2	Integrator complex subunit 6 OS=Mus musculus OX=10090 GN=Ints6 PE=1 SV=1	14.684	5.77576	90.1	89.1	102.8	97	102.6	95.3	90.4	109.5	109.8	113.3
Q501J2	Adenine nucleotide translocase lysine N-methyltransferase OS=Mus musculus OX=10090 GN=Antkmt PE=1 SV=1	14.675	12.2271	94.7	91.4	91.6	91.3	106.5	87.2	90.8	117.1	117.1	112.2
Q80WG5	Volume-regulated anion channel subunit LRRC8A OS=Mus musculus OX=10090 GN=Lrrc8a PE=1 SV=1	14.655	6.04938	89.8	78.6	100.9	91.9	98.2	102.3	94.8	113.3	113.4	116.9
P0CW02	Lymphocyte antigen 6C1 OS=Mus musculus OX=10090 GN=Ly6c1 PE=2 SV=1	14.635	29.0076	80.4	97.5	91.9	87.8	87.7	115.8	105.1	114.5	112.7	106.7
Q6P5E8	Diacylglycerol kinase theta OS=Mus musculus OX=10090 GN=Dgkq PE=1 SV=1	14.617	3.31906	92.1	81.2	86	87	98.8	104.3	101.2	116.5	119	113.8
Q9CQP2	Trafficking protein particle complex subunit 2 OS=Mus musculus OX=10090 GN=Trappc2 PE=1 SV=1	14.586	22.8571	96	96.1	96.4	96.3	105.4	96.4	106.5	98.1	112.2	96.6
Q9Z0H4	CUGBP Elav-like family member 2 OS=Mus musculus OX=10090 GN=Celf2 PE=1 SV=1	14.574	6.69291	93.2	95.2	92.4	101.1	91.8	113.3	101.4	105.6	100.5	105.7
B1AZP2	Disks large-associated protein 4 OS=Mus musculus OX=10090 GN=Dlgap4 PE=1 SV=1	14.432	1.6129	86	75.5	88.2	94.6	76.7	116.2	125.5	106.4	115.3	115.6
Q8BSI6	R3H and coiled-coil domain-containing protein 1 OS=Mus musculus OX=10090 GN=R3hcc1 PE=1 SV=3	14.401	4.71311	104.3	79.9	100.3	123.8	80.3	120.3	95.1	93.5	86.4	116
Q9D938	Transmembrane protein 160 OS=Mus musculus OX=10090 GN=Tmem160 PE=2 SV=1	14.364	12.234	123.3	88.2	120.5	89.1	108.1	76	87.2	99.8	117.2	90.7
Q7TQD2	Tubulin polymerization-promoting protein OS=Mus musculus OX=10090 GN=Tppp PE=1 SV=1	14.357	11.4679	76.4	84.9	81.2	96.2	97.6	114.7	99.9	113.7	107.2	128.2
Q8C863	E3 ubiquitin-protein ligase Itchy OS=Mus musculus OX=10090 GN=Itch PE=1 SV=2	14.309	4.39815	92.7	90.7	88.4	105.3	85	103.1	99.1	110.6	112.6	112.5
Q33DR3	All trans-polyprenyl-diphosphate synthase PDSS2 OS=Mus musculus OX=10090 GN=Pdss2 PE=1 SV=2	14.277	7.4813	105.3	90.8	98.9	99.8	111.1	97.7	92.1	99.2	106.8	98.2
Q8BHL5	Engulfment and cell motility protein 2 OS=Mus musculus OX=10090 GN=Elmo2 PE=1 SV=1	14.155	6.28415	79.2	84.2	97.6	79.4	100.4	90.4	103.4	122.2	128.7	114.6
Q91X84	CREB-regulated transcription coactivator 3 OS=Mus musculus OX=10090 GN=Crtc3 PE=1 SV=2	14.145	2.74637	102.2	91.8	97.2	104.4	95.7	103.2	93.5	106.5	103.9	101.7
Q921I6	SH3 domain-binding protein 4 OS=Mus musculus OX=10090 GN=Sh3bp4 PE=1 SV=1	14.09	3.7422	97.8	83.3	93.4	96.1	85.3	102.2	83.7	122.6	124.7	110.8
P49282	Natural resistance-associated macrophage protein 2 OS=Mus musculus OX=10090 GN=Slc11a2 PE=1 SV=2	14.062	6.8662	103	78.9	93.4	71.1	114.4	85.1	97.9	123.6	123.9	108.7
Q8K4Q0	Regulatory-associated protein of mTOR OS=Mus musculus OX=10090 GN=Rptor PE=1 SV=1	14.028	1.64794	84.3	92.9	97.9	94.7	98.6	93.6	96.4	108.5	123.1	109.9
P97326	Cadherin-6 OS=Mus musculus OX=10090 GN=Cdh6 PE=1 SV=2	13.999	4.17722	83.9	95.6	90.2	83.1	82.6	92.8	112.8	107.1	108.5	143.5
F8VQB6	Unconventional myosin-X OS=Mus musculus OX=10090 GN=Myo10 PE=1 SV=1	13.985	1.4549	95.9	80.1	89.4	77.3	91.3	89.6	88.6	124.4	142.8	120.5
Q8R1H0	Homeodomain-only protein OS=Mus musculus OX=10090 GN=Hopx PE=1 SV=1	13.962	13.6986	76.8	98.2	85.9	94.8	79	122.7	107.8	107.3	109.3	118.2
Q6PF93	Phosphatidylinositol 3-kinase catalytic subunit type 3 OS=Mus musculus OX=10090 GN=Pik3c3 PE=1 SV=1	13.925	4.39684	74	79.5	85.1	89.5	86.9	119.1	91.2	132.9	117.7	124.1
Q8VCD5	Mediator of RNA polymerase II transcription subunit 17 OS=Mus musculus OX=10090 GN=Med17 PE=1 SV=1	13.913	4.6225	73.6	67.2	64.9	64.3	69.3	103.1	115.3	138.8	157.2	146.4
P54276	DNA mismatch repair protein Msh6 OS=Mus musculus OX=10090 GN=Msh6 PE=1 SV=3	13.902	1.39912	99.7	93.5	110.7	95.3	107	93	100.6	96.7	102.1	101.3
P70277	Alpha-N-acetylgalactosaminide alpha-2,6-sialyltransferase 2 OS=Mus musculus OX=10090 GN=St6galnac2 PE=1 SV=2	13.87	8.31099	109.9	94.9	99.6	104.7	109	87.3	88.3	96.5	105.2	104.5
Q61542	StAR-related lipid transfer protein 3 OS=Mus musculus OX=10090 GN=Stard3 PE=1 SV=1	13.854	8.29596	104.4	82.2	96.5	102.7	105.1	98.7	90.7	103.6	104.8	111.2
Q3U1Z5	G-protein-signaling modulator 3 OS=Mus musculus OX=10090 GN=Gpsm3 PE=1 SV=2	13.842	15.7233	92.2	110.2	104.9	96.8	94.2	106.8	87.6	98.1	96.8	112.3
Q9ERU3	Zinc finger protein 22 OS=Mus musculus OX=10090 GN=Znf22 PE=1 SV=2	13.774	14.346	83	91.5	113.4	103.3	85.3	103.1	115.1	100.1	93.2	112.1
Q3TXT3	SOSS complex subunit C OS=Mus musculus OX=10090 GN=Inip PE=3 SV=1	13.764	15.3846	76.9	96.5	87.2	98.9	84.3	115.6	115.3	110.7	107.4	107.2
Q9CZT5	Vasorin OS=Mus musculus OX=10090 GN=Vasn PE=2 SV=2	13.74	6.68648	103.3	99.7	96.5	111.5	105.9	105.2	90.9	101	97.8	88.2
O55098	Serine/threonine-protein kinase 10 OS=Mus musculus OX=10090 GN=Stk10 PE=1 SV=2	13.484	2.69151	97.1	104.4	100.5	102.5	100.5	113.9	93.5	96.1	93.1	98.5
Q91WB7	Ubiquitin domain-containing protein 1 OS=Mus musculus OX=10090 GN=Ubtd1 PE=2 SV=1	13.448	7.48899	75.3	84.2	76.6	80.8	87	118.5	106.9	128.5	117.6	124.7
Q8VHN8	Tudor-interacting repair regulator protein OS=Mus musculus OX=10090 GN=Nudt16l1 PE=1 SV=2	13.398	12.7962	104.9	85.3	105.9	102.8	106	98.4	95	94.6	98.5	108.5
Q9ES56	Trafficking protein particle complex subunit 4 OS=Mus musculus OX=10090 GN=Trappc4 PE=1 SV=1	13.345	8.6758	102.4	86	84	84.3	106.8	90.4	108.3	110.5	120	107.4
Q3UHX9	Putative methyltransferase C9orf114 homolog OS=Mus musculus OX=10090 GN=Spout1 PE=1 SV=1	13.328	5.45455	91.6	91.1	104.8	94	94.1	109.1	94.1	110.8	102.7	107.6
A2AI08	Taperin OS=Mus musculus OX=10090 GN=Tprn PE=1 SV=1	13.3	3.07076	89.3	96.2	104.7	98.8	95.8	103.8	95.3	99.2	102.5	114.3
Q923E4	NAD-dependent protein deacetylase sirtuin-1 OS=Mus musculus OX=10090 GN=Sirt1 PE=1 SV=2	13.216	5.29172	84.1	97.2	89.3	97	88.4	115.6	115.5	107.9	97.9	107.1
P52795	Ephrin-B1 OS=Mus musculus OX=10090 GN=Efnb1 PE=1 SV=1	13.216	11.3043	56.7	86.1	58.2	74.2	187.2	86.4	152.7	84.1	120.8	93.5
O35066	Kinesin-like protein KIF3C OS=Mus musculus OX=10090 GN=Kif3c PE=1 SV=3	13.164	5.15075	122.6	93.6	95.3	137.8	86.3	115.9	97.9	76.5	74.2	99.8
Q8BHN5	RNA-binding protein 45 OS=Mus musculus OX=10090 GN=Rbm45 PE=1 SV=1	13.128	4.20168	82.4	80.7	81.8	87.7	79.7	126.5	107.8	115	116.2	122.2
Q6DFW5	Phospholipid-transporting ATPase IF OS=Mus musculus OX=10090 GN=Atp11b PE=1 SV=1	13.127	4	79.5	73.8	76.4	72	77.9	109.8	106.8	122.1	145.6	136.1
Q8VCG4	Complement component C8 gamma chain OS=Mus musculus OX=10090 GN=C8g PE=1 SV=1	13.114	14.3564	97.3	112.7	100	107.6	103.5	100.2	97.7	91.9	86.1	103.1
O70370	Cathepsin S OS=Mus musculus OX=10090 GN=Ctss PE=1 SV=2	13.112	7.64706	59.6	97.4	65	88.6	73.5	147.9	114.4	117.2	119.4	117
Q8K003	Translation machinery-associated protein 7 OS=Mus musculus OX=10090 GN=Tma7 PE=3 SV=1	13.058	29.6875	96.9	112.4	102	111.3	93.3	101.7	102.1	90.2	91.9	98.1
Q91VX2	Ubiquitin-associated protein 2 OS=Mus musculus OX=10090 GN=Ubap2 PE=1 SV=1	13.028	3.26855	98.8	99.4	116.6	111.8	95.2	87.7	84.6	98.4	102.9	104.7
Q80V94	AP-4 complex subunit epsilon-1 OS=Mus musculus OX=10090 GN=Ap4e1 PE=1 SV=3	13.01	3.0303	85.7	94.3	101.4	97.1	105.6	97.4	115.7	91.2	106.1	105.6
Q8CB27	Ubiquitin thioesterase OTU1 OS=Mus musculus OX=10090 GN=Yod1 PE=1 SV=1	12.963	10.2041	91.1	90.3	98	96.9	94.5	104	86.7	101.2	110.7	126.6
Q80XA6	RalBP1-associated Eps domain-containing protein 2 OS=Mus musculus OX=10090 GN=Reps2 PE=1 SV=2	12.938	5.25502	91.5	97.1	94.2	103.4	105.3	104.1	94	103.5	96.1	110.6
Q9DBD5	Proline-, glutamic acid- and leucine-rich protein 1 OS=Mus musculus OX=10090 GN=Pelp1 PE=1 SV=2	12.924	2.67142	90.2	87.7	87.9	74.3	100.2	87.8	107.2	120.4	126.7	117.8
P30285	Cyclin-dependent kinase 4 OS=Mus musculus OX=10090 GN=Cdk4 PE=1 SV=1	12.92	14.8515	97.5	94.5	100.7	90.5	110.8	91.7	94.4	101.1	108.7	110.1
Q8R2Q8	Bone marrow stromal antigen 2 OS=Mus musculus OX=10090 GN=Bst2 PE=1 SV=1	12.915	11.0465	67.6	98.9	54.9	57	65.5	93.1	111.3	139.3	167.2	145.2
Q3TLD5	Unconventional prefoldin RPB5 interactor OS=Mus musculus OX=10090 GN=Uri1 PE=1 SV=2	12.903	5.46139	91.7	98.5	87.6	99.2	82.8	114.9	105.6	102	103	114.9
O89050	Muskelin OS=Mus musculus OX=10090 GN=Mkln1 PE=1 SV=1	12.872	3.94558	100.5	82.9	80.5	104.3	94.7	99.5	85.3	124.8	107.2	120.1
Q8R0S9	Solute carrier family 22 member 22 OS=Mus musculus OX=10090 GN=Slc22a22 PE=1 SV=1	12.811	5.05415	112.1	77	88	80.9	128.3	76.3	102.4	111	126.4	97.6
Q5H8C4	Vacuolar protein sorting-associated protein 13A OS=Mus musculus OX=10090 GN=Vps13a PE=1 SV=1	12.786	1.45294	96.2	85	91.8	85.8	127.5	82.7	108.7	101.3	116.2	104.8
Q9WTL2	Ras-related protein Rab-25 OS=Mus musculus OX=10090 GN=Rab25 PE=1 SV=2	12.783	13.1455	89.8	95.9	89.8	85.8	90.2	137.7	117.1	98	93.7	102
Q9DBD0	Inhibitor of carbonic anhydrase OS=Mus musculus OX=10090 GN=Ica PE=1 SV=1	12.78	4	72.6	109.7	84.8	97	83.9	133.1	102.7	104.4	85.3	126.4
Q05909	Receptor-type tyrosine-protein phosphatase gamma OS=Mus musculus OX=10090 GN=Ptprg PE=1 SV=1	12.778	3.12067	110.2	98.7	98.1	101.3	116.6	85.5	93	97.5	107.9	91.3
Q99P87	Resistin OS=Mus musculus OX=10090 GN=Retn PE=1 SV=1	12.711	36.8421	113.5	96.2	161.9	129.7	121	62.4	77.3	73	77	88
Q9CRC3	UPF0235 protein C15orf40 homolog OS=Mus musculus OX=10090 PE=1 SV=1	12.71	19.0476	91.8	105.8	103.1	114.8	93.9	109.9	86.2	99.6	94.1	100.8
P48725	Pericentrin OS=Mus musculus OX=10090 GN=Pcnt PE=1 SV=2	12.677	1.38026	101.7	101.7	99.3	96.4	97.3	109.3	96.1	81.5	114.6	102.1
O09005	Sphingolipid delta(4)-desaturase DES1 OS=Mus musculus OX=10090 GN=Degs1 PE=1 SV=1	12.582	10.5263	88.5	83.1	93.2	84.3	87.8	94	86.8	132.7	123.7	125.9
Q9DC37	Major facilitator superfamily domain-containing protein 1 OS=Mus musculus OX=10090 GN=Mfsd1 PE=1 SV=1	12.573	3.66379	99.8	87.2	101	79.5	115.3	83.1	94.2	107.6	120.8	111.6
Q6NVE8	WD repeat-containing protein 44 OS=Mus musculus OX=10090 GN=Wdr44 PE=1 SV=1	12.54	4.2623	95.9	85.9	103.5	101.7	90.1	111.1	96.6	99.4	103.5	112.2
Q8CGF1	Rho GTPase-activating protein 29 OS=Mus musculus OX=10090 GN=Arhgap29 PE=1 SV=1	12.497	1.81675	95.3	100.8	98.4	95.6	105.5	102.2	100.3	101.8	104.6	95.4
O35207	Cyclin-dependent kinase 2-associated protein 1 OS=Mus musculus OX=10090 GN=Cdk2ap1 PE=1 SV=2	12.462	18.4211	85.5	97.6	97.9	104	83	116.4	107	107.6	101.1	99.9
P56392	Cytochrome c oxidase subunit 7A1, mitochondrial OS=Mus musculus OX=10090 GN=Cox7a1 PE=1 SV=1	12.457	31.25	103.1	95	96.9	100.3	119.1	104.7	92.8	97.5	102.1	88.4
Q9WVG6	Histone-arginine methyltransferase CARM1 OS=Mus musculus OX=10090 GN=Carm1 PE=1 SV=2	12.404	3.94737	101.6	93.3	95.3	92	104	91.6	99.1	100.5	113.1	109.5
Q9CXK9	RNA-binding protein 33 OS=Mus musculus OX=10090 GN=Rbm33 PE=1 SV=2	12.388	2.84322	95.2	98.2	99.6	99.6	93.6	96.8	100.9	96.5	106.1	113.4
Q91Y86	Mitogen-activated protein kinase 8 OS=Mus musculus OX=10090 GN=Mapk8 PE=1 SV=1	12.357	10.4167	85.9	81.3	97.7	95.5	99.7	112.5	104.9	110.2	102	110.2
O70209	PDZ and LIM domain protein 3 OS=Mus musculus OX=10090 GN=Pdlim3 PE=1 SV=1	12.339	7.59494	90.6	95.8	93.6	107	86.5	120	110.5	92.6	100.6	102.9
P70340	Mothers against decapentaplegic homolog 1 OS=Mus musculus OX=10090 GN=Smad1 PE=1 SV=2	12.308	7.95699	77.7	89.4	83.3	101.7	89.3	125.2	110.9	111.7	103.8	106.8
A2AAE1	Transmembrane protein KIAA1109 OS=Mus musculus OX=10090 GN=Kiaa1109 PE=1 SV=4	12.197	0.719281	93.9	91	102.5	92.5	94.8	101.1	93	111.3	117.9	102
Q8C025	Cholinephosphotransferase 1 OS=Mus musculus OX=10090 GN=Chpt1 PE=1 SV=1	12.197	6.03015	97.4	84.3	106	83.7	104.3	91.4	102	101.2	122.1	107.7
Q9QWY8	Arf-GAP with SH3 domain, ANK repeat and PH domain-containing protein 1 OS=Mus musculus OX=10090 GN=Asap1 PE=1 SV=2	12.171	2.35397	85.4	101.8	97.8	98.8	101.3	109.7	102.2	102.3	100.1	100.7
Q01149	Collagen alpha-2(I) chain OS=Mus musculus OX=10090 GN=Col1a2 PE=1 SV=2	12.148	2.04082	138.4	121.7	113.1	112.8	91.3	75.7	72.2	95.5	83.8	95.4
Q9ESJ0	Exportin-4 OS=Mus musculus OX=10090 GN=Xpo4 PE=1 SV=2	12.115	1.99826	104.7	83	105.8	81.3	104.9	79.2	95.8	112.2	120.5	112.6
Q02357	Ankyrin-1 OS=Mus musculus OX=10090 GN=Ank1 PE=1 SV=2	12.107	1.98711	69.3	89.4	82.3	94.4	93	120.3	114.9	113.2	91	132.1
Q3TAA7	Serine/threonine-protein kinase 11-interacting protein OS=Mus musculus OX=10090 GN=Stk11ip PE=1 SV=1	12.047	2.89179	74.9	76.9	87.2	86.1	94.4	110.3	110.1	113.9	124.9	121.3
Q9DAC7	Tetratricopeptide repeat protein 32 OS=Mus musculus OX=10090 GN=Ttc32 PE=1 SV=1	12.031	18.9189	85	85.5	105.9	102.1	94.7	103.3	96.3	108.3	104.1	114.9
Q80TM6	R3H domain-containing protein 2 OS=Mus musculus OX=10090 GN=R3hdm2 PE=1 SV=2	12.013	3.2567	96.3	85.4	104.7	107.4	97.5	103.8	87.9	100.7	100.1	116.2
P61804	Dolichyl-diphosphooligosaccharide--protein glycosyltransferase subunit DAD1 OS=Mus musculus OX=10090 GN=Dad1 PE=1 SV=3	12.006	19.469	122.7	93.4	103.5	89	109.2	86.3	106.2	85.6	110.2	93.9
Q9QXN3	Activating signal cointegrator 1 OS=Mus musculus OX=10090 GN=Trip4 PE=1 SV=2	11.99	5.33563	88.7	88.1	91.7	90.8	95.2	108	99.5	113.3	109.8	115.1
Q9D074	E3 ubiquitin-protein ligase MGRN1 OS=Mus musculus OX=10090 GN=Mgrn1 PE=1 SV=2	11.956	5.6391	103.3	113.7	107.7	101.3	108.7	88.7	87.5	96.7	94.4	98
Q6VN19	Ran-binding protein 10 OS=Mus musculus OX=10090 GN=Ranbp10 PE=1 SV=2	11.921	5.16129	86.9	87.3	95.3	98.4	92	101.1	92.8	113.5	109.8	122.8
Q6ZQ82	Rho GTPase-activating protein 26 OS=Mus musculus OX=10090 GN=Arhgap26 PE=1 SV=3	11.882	3.80835	87.6	88.3	85.2	99.3	95.6	106.3	101.7	116.1	106.5	113.5
Q8BMK0	Centrosomal protein of 85 kDa OS=Mus musculus OX=10090 GN=Cep85 PE=1 SV=2	11.833	7.35874	91.3	80.5	87.4	83.8	88.5	112	93	120.3	125.7	117.4
Q61382	TNF receptor-associated factor 4 OS=Mus musculus OX=10090 GN=Traf4 PE=1 SV=2	11.801	5.10638	91.6	95.5	101.6	102.4	96.6	100.5	96.4	106.9	106.2	102.3
Q8BUH1	Thioredoxin-like protein 4B OS=Mus musculus OX=10090 GN=Txnl4b PE=2 SV=2	11.751	21.4765	90.5	102.6	91.2	109.3	99.4	106.1	100.9	104.5	98.3	97.2
P70265	6-phosphofructo-2-kinase/fructose-2,6-bisphosphatase 2 OS=Mus musculus OX=10090 GN=Pfkfb2 PE=1 SV=2	11.717	6.1657	90.6	122	86.1	116	107.1	87.1	97.9	99.6	98	95.7
Q5M956	BTB/POZ domain-containing protein KCTD1 OS=Mus musculus OX=10090 GN=Kctd1 PE=1 SV=1	11.715	15.1751	76.4	104.3	87.3	87.9	80.7	116.1	114.6	111.2	101.3	120.2
Q6NSR3	Uncharacterized aarF domain-containing protein kinase 2 OS=Mus musculus OX=10090 GN=Adck2 PE=2 SV=1	11.705	5.18639	108.7	94.1	118.5	99.4	102.7	83.9	88.2	90.6	101.1	112.7
P59114	mRNA (2'-O-methyladenosine-N(6)-)-methyltransferase OS=Mus musculus OX=10090 GN=Pcif1 PE=1 SV=1	11.683	4.95751	95.6	93.3	89.2	90.1	85.8	123.6	103	100.7	116.4	102.3
O35566	CD151 antigen OS=Mus musculus OX=10090 GN=Cd151 PE=1 SV=2	11.683	6.32411	108.8	89	93.6	71.7	102.4	80.3	108.9	114.7	126.2	104.3
B1AUE5	Peroxisome biogenesis factor 10 OS=Mus musculus OX=10090 GN=Pex10 PE=2 SV=1	11.654	5.55556	122.2	77.1	98.7	77.6	126.5	73.9	82.5	105	133.8	102.8
Q8R3C6	Probable RNA-binding protein 19 OS=Mus musculus OX=10090 GN=Rbm19 PE=1 SV=1	11.616	3.2563	77.8	81.9	91.3	85.2	82.4	112.9	114.2	116.6	119	118.6
Q8BSS9	Liprin-alpha-2 OS=Mus musculus OX=10090 GN=Ppfia2 PE=1 SV=2	11.598	2.22753	96.2	118.2	116	104	94.8	102	88.2	96.1	88.3	96.2
Q8BXA1	Golgi integral membrane protein 4 OS=Mus musculus OX=10090 GN=Golim4 PE=1 SV=1	11.535	1.83206	95.1	74.4	87	70.2	99.8	93	104.6	123.7	137.8	114.5
P58466	Carboxy-terminal domain RNA polymerase II polypeptide A small phosphatase 1 OS=Mus musculus OX=10090 GN=Ctdsp1 PE=1 SV=1	11.533	9.1954	116	84.8	101.1	94.9	97.1	106.7	90.4	110.2	106.9	92.1
Q9Z1R4	Uncharacterized protein C6orf47 homolog OS=Mus musculus OX=10090 GN=D17h6s53e PE=1 SV=1	11.507	6.82594	108.9	81.3	92.5	86.8	93.4	87.6	89.2	114.3	136.7	109.2
Q9WTJ4	Flt3-interacting zinc finger protein 1 OS=Mus musculus OX=10090 GN=Fiz1 PE=1 SV=1	11.489	17	133.3	81	93.3	164.1	84.6	117.9	89.5	76.6	71.8	87.8
Q5KU39	Vacuolar protein sorting-associated protein 41 homolog OS=Mus musculus OX=10090 GN=Vps41 PE=1 SV=1	11.474	3.1653	35.6	552.8	75.2	62.5	56.9	39.1	42.2	43.1	48.2	44.6
P43137	Lithostathine-1 OS=Mus musculus OX=10090 GN=Reg1 PE=1 SV=1	11.366	16.3636	155.3	118.4	131.7	123.9	109.5	63.8	58.8	92.5	74.7	71.4
Q9D1M4	Eukaryotic translation elongation factor 1 epsilon-1 OS=Mus musculus OX=10090 GN=Eef1e1 PE=1 SV=1	11.353	12.6437	93.4	102.1	92.1	100.9	99.8	97.8	95.6	107.7	105	105.6
Q9CQQ8	U6 snRNA-associated Sm-like protein LSm7 OS=Mus musculus OX=10090 GN=Lsm7 PE=1 SV=1	11.339	39.8058	86	110.1	93.1	105.3	89.1	115.5	109.9	101.2	93.7	96.1
Q8BKH7	Target of rapamycin complex 2 subunit MAPKAP1 OS=Mus musculus OX=10090 GN=Mapkap1 PE=1 SV=1	11.306	5.17241	111	90.1	101.8	89.3	98.3	97.7	89.3	105	112.5	105.1
Q99K95	Replication termination factor 2 OS=Mus musculus OX=10090 GN=Rtf2 PE=1 SV=1	11.231	9.12052	108.9	91.3	98.5	114.9	81	102.6	91.4	98.5	97.9	115
P62488	DNA-directed RNA polymerase II subunit RPB7 OS=Mus musculus OX=10090 GN=Polr2g PE=1 SV=1	11.212	16.8605	82.1	88.2	86.8	98.3	90.2	117.9	109.7	108.7	101.3	116.8
Q6DG52	Protein Churchill OS=Mus musculus OX=10090 GN=Churc1 PE=3 SV=1	11.208	26.7857	111.7	96.6	105	102.5	102.8	99	99.2	93.5	97.7	91.9
Q3UN90	LYR motif-containing protein 9 OS=Mus musculus OX=10090 GN=Lyrm9 PE=3 SV=1	11.203	30.7692	95.2	109.8	110	109.5	102.4	106	90.3	91	91.6	94.2
Q08639	Transcription factor Dp-1 OS=Mus musculus OX=10090 GN=Tfdp1 PE=1 SV=1	11.173	7.56098	108	81.5	96.2	97.8	103.6	99.2	90	100.7	113.1	109.7
Q61127	NGFI-A-binding protein 2 OS=Mus musculus OX=10090 GN=Nab2 PE=1 SV=2	11.172	6.47619	87.1	86.9	89.9	100.3	88.6	118.5	106.2	109.4	98	115.2
Q9CXF0	Kynureninase OS=Mus musculus OX=10090 GN=Kynu PE=1 SV=3	11.165	6.46552	63.5	133.4	138.3	119.2	100.7	79.6	105.6	80.6	76.7	102.3
Q9CY28	GTP-binding protein 8 OS=Mus musculus OX=10090 GN=Gtpbp8 PE=2 SV=1	11.11	12.2807	132.9	98.7	122.6	103.8	115.9	76.8	79.9	85	96.1	88.3
Q8BPB5	EGF-containing fibulin-like extracellular matrix protein 1 OS=Mus musculus OX=10090 GN=Efemp1 PE=1 SV=1	11.081	7.50507	112.6	97.9	100.5	94.4	106.1	104.4	95.8	95.9	90.6	101.7
P70662	LIM domain-binding protein 1 OS=Mus musculus OX=10090 GN=Ldb1 PE=1 SV=2	11.065	6.08273	98.2	88.6	102.4	99.2	97.7	90.3	99.1	105.3	113.6	105.6
Q91VC9	Growth hormone-inducible transmembrane protein OS=Mus musculus OX=10090 GN=Ghitm PE=1 SV=1	11.058	5.20231	213.8	70.7	95.2	114	106.9	83.2	70.4	73.5	92.7	79.6
Q8BIH0	Histone deacetylase complex subunit SAP130 OS=Mus musculus OX=10090 GN=Sap130 PE=1 SV=2	11.03	1.60833	79.5	92.2	92.3	106.3	85.7	119.7	91.7	117.7	98.4	116.6
Q8R2Z5	von Willebrand factor A domain-containing protein 1 OS=Mus musculus OX=10090 GN=Vwa1 PE=1 SV=1	11.021	9.39759	121.5	107.8	114.7	103.6	110.8	95.9	86	88.5	85.4	85.6
Q9D799	Methionyl-tRNA formyltransferase, mitochondrial OS=Mus musculus OX=10090 GN=Mtfmt PE=2 SV=3	10.994	6.47668	106.8	104.4	109	105.8	117.9	88.2	85.9	89.7	99.2	93.1
Q9DD02	Protein Hikeshi OS=Mus musculus OX=10090 GN=Hikeshi PE=1 SV=1	10.991	21.3198	94.6	99.7	89.9	102.8	94.9	102.4	104.3	104.7	101	105.6
Q9R118	Serine protease HTRA1 OS=Mus musculus OX=10090 GN=Htra1 PE=1 SV=2	10.977	5.83333	95.5	98.6	99.9	112.9	121.5	86.9	88.5	90.8	92.9	112.4
Q8BHA3	D-aminoacyl-tRNA deacylase 2 OS=Mus musculus OX=10090 GN=Dtd2 PE=1 SV=1	10.974	11.3095	95.2	102.5	103.4	108.4	96.8	109.3	91.8	100.8	96	95.8
P52482	Ubiquitin-conjugating enzyme E2 E1 OS=Mus musculus OX=10090 GN=Ube2e1 PE=1 SV=1	10.971	23.3161	107.5	89.6	96.8	97.6	108.6	87.3	91.9	101.2	111.1	108.2
Q80U38	Protein KHNYN OS=Mus musculus OX=10090 GN=Khnyn PE=2 SV=2	10.939	4.769	103.8	80.7	104.3	90.2	87.5	122.1	91.7	105.8	108.5	105.4
Q4VBE8	WD repeat-containing protein 18 OS=Mus musculus OX=10090 GN=Wdr18 PE=1 SV=1	10.933	4.87239	80.9	83.9	84.4	97.9	107.7	104.4	113.3	107	111.8	108.7
Q9CYN9	Renin receptor OS=Mus musculus OX=10090 GN=Atp6ap2 PE=1 SV=2	10.895	8.28571	103.7	93.4	103.6	91.8	104.5	94.5	114.1	96.9	101.1	96.4
Q3THK3	General transcription factor IIF subunit 1 OS=Mus musculus OX=10090 GN=Gtf2f1 PE=1 SV=2	10.878	3.34646	103.2	88.8	123.4	114.1	97.7	104.2	103.1	81	88.4	96.1
Q8QZY6	Tetraspanin-14 OS=Mus musculus OX=10090 GN=Tspan14 PE=1 SV=1	10.873	10.3704	109	95.5	103	94.6	104	96.1	84.2	106.4	103.7	103.5
Q99LQ7	Plasmanylethanolamine desaturase OS=Mus musculus OX=10090 GN=PEDS1 PE=1 SV=1	10.829	12.1771	104.5	80.6	87.4	92.7	84.7	90	85.1	119.9	130.3	124.8
Q8C172	Ceramide synthase 6 OS=Mus musculus OX=10090 GN=Cers6 PE=1 SV=1	10.827	4.94792	83.6	74.1	92	72.1	100.5	71.8	97.7	120.1	154	134.2
Q9QWK4	CD5 antigen-like OS=Mus musculus OX=10090 GN=Cd5l PE=1 SV=3	10.826	6.53409	106.7	185.4	102.4	113.7	94.1	90.1	84.4	67.9	78	77.1
Q9DBR4	Amyloid-beta A4 precursor protein-binding family B member 2 OS=Mus musculus OX=10090 GN=Apbb2 PE=1 SV=2	10.821	2.63158	113	110.4	123.3	116.4	111.7	86.7	82	91.1	80.4	84.9
Q99J25	rRNA methyltransferase 1, mitochondrial OS=Mus musculus OX=10090 GN=Mrm1 PE=2 SV=2	10.719	11.25	102.8	104.5	96.2	108.8	101.5	90.3	83.5	119.1	88.7	104.7
Q8R5A6	TBC1 domain family member 22A OS=Mus musculus OX=10090 GN=Tbc1d22a PE=1 SV=3	10.681	3.48837	96.1	86.9	92.6	79.1	93.9	84.9	99.3	122.8	125.2	119.1
Q91VY9	Zinc finger protein 622 OS=Mus musculus OX=10090 GN=Znf622 PE=1 SV=1	10.675	7.77311	87.3	89.7	94.2	101.5	94.6	109.7	104.8	102.5	100.9	114.7
A2A6Q5	Cell division cycle protein 27 homolog OS=Mus musculus OX=10090 GN=Cdc27 PE=1 SV=1	10.647	4.60606	85.7	95.5	85.1	99.5	98.9	103.4	96.3	118.5	107.7	109.4
Q99KI3	ER membrane protein complex subunit 3 OS=Mus musculus OX=10090 GN=Emc3 PE=1 SV=3	10.638	11.8774	109	96.8	126.9	99.3	113.5	81.7	95.2	88.6	96.1	92.9
Q8BZZ3	NEDD4-like E3 ubiquitin-protein ligase WWP1 OS=Mus musculus OX=10090 GN=Wwp1 PE=1 SV=2	10.621	2.72331	101.6	99.5	105.8	119.2	113.3	104.9	93.5	90.6	87.8	83.7
P70399	TP53-binding protein 1 OS=Mus musculus OX=10090 GN=Tp53bp1 PE=1 SV=3	10.599	1.62519	95	92.4	92.4	98.7	92.2	104.8	93.7	113.3	107.7	109.8
Q9QZW0	Phospholipid-transporting ATPase 11C OS=Mus musculus OX=10090 GN=Atp11c PE=1 SV=2	10.595	3.10009	95.8	88.2	100	84	125.2	89.9	92.1	106.3	115	103.5
P53995	Anaphase-promoting complex subunit 1 OS=Mus musculus OX=10090 GN=Anapc1 PE=1 SV=2	10.536	1.33745	93.8	98.6	97.5	97.1	101.7	103.8	96	101.5	105.3	104.7
Q793I8	TRAF-interacting protein with FHA domain-containing protein A OS=Mus musculus OX=10090 GN=Tifa PE=1 SV=1	10.445	11.9565	51.3	54.4	50.8	54.9	65.2	115.2	124	141.2	166.4	176.6
P39098	Mannosyl-oligosaccharide 1,2-alpha-mannosidase IB OS=Mus musculus OX=10090 GN=Man1a2 PE=1 SV=1	10.433	4.68019	108.1	90.2	99	87.7	103.3	88	96.9	97.6	117.9	111.4
O08580	Steroid hormone receptor ERR1 OS=Mus musculus OX=10090 GN=Esrra PE=1 SV=4	10.388	5.92417	118.3	106.6	131	95.7	131.9	71.4	71.5	94.1	96.6	82.9
Q3U3R4	Lipase maturation factor 1 OS=Mus musculus OX=10090 GN=Lmf1 PE=1 SV=1	10.38	5.05226	147.7	98.7	108.7	77.5	122.3	70.1	76.2	91.6	111.3	96
Q8VDY9	Caspase activity and apoptosis inhibitor 1 OS=Mus musculus OX=10090 GN=Caap1 PE=1 SV=2	10.362	5.33708	86.1	98.9	93.3	107.3	92.2	108.1	103.2	106.3	100.3	104.4
Q8VHL1	Histone-lysine N-methyltransferase SETD7 OS=Mus musculus OX=10090 GN=Setd7 PE=1 SV=2	10.343	9.83607	94.2	105.7	90.2	93.3	95.7	110.4	108.9	109.2	94.2	98.2
Q8VE42	Ankyrin repeat domain-containing protein 49 OS=Mus musculus OX=10090 GN=Ankrd49 PE=1 SV=1	10.329	8.40336	126.6	87.1	103.3	93	124.5	89.8	84.6	92.7	102.6	95.7
Q8R121	Protein Z-dependent protease inhibitor OS=Mus musculus OX=10090 GN=Serpina10 PE=1 SV=1	10.295	6.47321	30.1	64	36.5	54.6	39.7	274	157	116.7	88.1	139.3
P47877	Insulin-like growth factor-binding protein 2 OS=Mus musculus OX=10090 GN=Igfbp2 PE=2 SV=2	10.273	11.1475	171.1	105.8	121.2	108.7	131.9	87.2	72.5	71.3	65.4	64.8
Q64191	N(4)-(beta-N-acetylglucosaminyl)-L-asparaginase OS=Mus musculus OX=10090 GN=Aga PE=1 SV=1	10.239	8.3815	103.3	76.2	95.5	96.1	107.6	94.1	106	111.2	78.4	131.6
Q69ZR9	Protein TASOR OS=Mus musculus OX=10090 GN=Tasor PE=1 SV=2	10.223	2.04969	92.4	92.8	95.8	93	92.4	121.1	99	106.7	103.6	103.3
O88736	3-keto-steroid reductase/17-beta-hydroxysteroid dehydrogenase 7 OS=Mus musculus OX=10090 GN=Hsd17b7 PE=1 SV=1	10.19	7.48503	98.5	85.7	95	91.7	103.6	93.2	90.6	118.3	110.8	112.6
Q8BTR5	Dual specificity phosphatase 28 OS=Mus musculus OX=10090 GN=Dusp28 PE=1 SV=1	10.173	17.1779	96.9	82.6	93.6	100.5	92.8	105.2	98.3	108.2	105.3	116.5
P31649	Sodium- and chloride-dependent GABA transporter 2 OS=Mus musculus OX=10090 GN=Slc6a13 PE=1 SV=1	10.151	4.81728	117.1	84.5	129.5	85.1	126.7	81.8	97	87.5	99.3	91.4
Q9CPV3	39S ribosomal protein L42, mitochondrial OS=Mus musculus OX=10090 GN=Mrpl42 PE=1 SV=1	10.151	35.2113	106.8	110.1	116.3	117.9	101.9	97.9	83.7	86	84.8	94.6
Q8K1E6	Alpha-ketoglutarate-dependent dioxygenase alkB homolog 3 OS=Mus musculus OX=10090 GN=Alkbh3 PE=1 SV=1	10.14	12.5874	88.8	107	108.9	114.7	89.1	106	85.3	103.6	94	102.7
Q8R0K9	Transcription factor E2F4 OS=Mus musculus OX=10090 GN=E2f4 PE=1 SV=1	10.13	6.09756	90.3	94.3	101.6	103.8	94.7	101.7	99	100.8	107	106.8
Q9JIM1	Equilibrative nucleoside transporter 1 OS=Mus musculus OX=10090 GN=Slc29a1 PE=1 SV=3	10.123	5.86957	117.8	88	118.8	82.6	118.3	76	89.8	81.9	119.8	107
Q9ESJ4	NCK-interacting protein with SH3 domain OS=Mus musculus OX=10090 GN=Nckipsd PE=1 SV=2	10.119	2.94118	114.6	89	101.2	79.3	114.8	94.3	90.1	110.7	106.5	99.4
P04202	Transforming growth factor beta-1 proprotein OS=Mus musculus OX=10090 GN=Tgfb1 PE=1 SV=1	10.105	13.8462	93.4	87.9	110	100.8	95.5	98.8	88.1	108.1	112.2	105.1
Q8K0T4	Katanin p60 ATPase-containing subunit A-like 1 OS=Mus musculus OX=10090 GN=Katnal1 PE=1 SV=1	10.104	6.55738	105.7	81.5	111.1	106.2	110.8	94.5	86.3	92.7	108.1	103
Q5PRF0	HEAT repeat-containing protein 5A OS=Mus musculus OX=10090 GN=Heatr5a PE=1 SV=2	10.093	1.3739	120.6	83.8	107.6	72.1	94.1	84.3	88.7	107.3	131.4	110.1
Q8BL48	RING finger protein unkempt homolog OS=Mus musculus OX=10090 GN=Unk PE=1 SV=1	10.068	5.92593	75.8	86.9	81.6	94.7	77.6	129.6	100.2	113.6	118.8	121.3
Q99MZ3	Carbohydrate-responsive element-binding protein OS=Mus musculus OX=10090 GN=Mlxipl PE=1 SV=1	10.057	3.00926	103.3	89.7	99.4	93.3	104.8	94.6	94.1	96.9	107.8	116.1
P46718	Programmed cell death protein 2 OS=Mus musculus OX=10090 GN=Pdcd2 PE=2 SV=2	10.016	7.28863	96.9	98.8	97.9	101.7	90.5	104.4	100.8	100.8	99.4	108.8
Q05860	Formin-1 OS=Mus musculus OX=10090 GN=Fmn1 PE=1 SV=2	9.969	1.15962	109.4	87.4	90.8	112.4	87.4	96	86	114.5	102.9	113.2
Q99MJ6	Na(+)/H(+) exchange regulatory cofactor NHE-RF4 OS=Mus musculus OX=10090 GN=Pdzd3 PE=1 SV=1	9.963	5.62249	80	136.4	80.8	120.8	93.3	134.3	83.4	105.8	80.8	84.5
Q9JLM9	Growth factor receptor-bound protein 14 OS=Mus musculus OX=10090 GN=Grb14 PE=1 SV=1	9.942	3.71747	80.6	104	102.4	111.7	92	105.4	86.9	115.9	91.2	109.8
Q9QXY1	Tight junction protein ZO-3 OS=Mus musculus OX=10090 GN=Tjp3 PE=1 SV=1	9.935	2.54144	72.3	98.9	88.2	101.4	88.5	114.6	105.6	112.7	104.5	113.3
Q9JJY4	Probable ATP-dependent RNA helicase DDX20 OS=Mus musculus OX=10090 GN=Ddx20 PE=1 SV=2	9.928	4.24242	92.9	86.1	92.2	98.4	101.7	97.7	92	115.7	115.4	107.8
Q9ERR1	Nuclear distribution protein nudE-like 1 OS=Mus musculus OX=10090 GN=Ndel1 PE=1 SV=2	9.896	5.7971	104.9	95.9	110	116.1	93.4	98.9	86.9	97.6	96.6	99.6
Q8C3W1	Uncharacterized protein C1orf198 homolog OS=Mus musculus OX=10090 PE=1 SV=1	9.891	7.45342	91.4	82	83.2	96.9	87	84.2	98.5	102.5	146.5	127.7
Q60738	Zinc transporter 1 OS=Mus musculus OX=10090 GN=Slc30a1 PE=1 SV=1	9.888	3.77734	116.9	83.6	89.9	75.1	108.1	76.6	94.1	112.3	131.3	111.9
Q64321	Zinc finger and BTB domain-containing protein 7B OS=Mus musculus OX=10090 GN=Zbtb7b PE=1 SV=2	9.886	4.41176	78.1	97.3	99.2	104.3	88.7	113	94.2	103.4	108.6	113.2
Q9DB98	Leukocyte receptor cluster member 1 homolog OS=Mus musculus OX=10090 GN=Leng1 PE=2 SV=1	9.878	10.3448	88.4	103.9	98	117.6	90.7	109.5	90.6	103.7	93.8	103.7
O09118	Netrin-1 OS=Mus musculus OX=10090 GN=Ntn1 PE=1 SV=3	9.862	3.80795	93.6	89.9	89.6	105.9	88.6	119.7	100.4	104.4	108.2	99.7
Q3U0V2	Tumor necrosis factor receptor type 1-associated DEATH domain protein OS=Mus musculus OX=10090 GN=Tradd PE=1 SV=1	9.861	9.03226	88.2	189	99.6	86	82.5	92.1	76.5	90.9	91.9	103.3
Q9Z0W3	Nuclear pore complex protein Nup160 OS=Mus musculus OX=10090 GN=Nup160 PE=1 SV=2	9.858	2.85307	97.7	106.9	119.7	104.1	101	88.8	88.1	96.9	100.8	95.8
P05622	Platelet-derived growth factor receptor beta OS=Mus musculus OX=10090 GN=Pdgfrb PE=1 SV=2	9.769	2.36794	88.8	81.4	84.9	77.7	92.5	95.3	99	129	128.9	122.6
Q8VD31	Tapasin-related protein OS=Mus musculus OX=10090 GN=Tapbpl PE=1 SV=2	9.766	4.21286	76.7	86.6	69.9	72.7	77.6	88.5	98.7	131.2	152.1	146
Q6ZPY7	Lysine-specific demethylase 3B OS=Mus musculus OX=10090 GN=Kdm3b PE=1 SV=2	9.705	1.21639	77.3	84.8	91.2	80.2	81.2	114.8	133	114.6	108.2	114.8
Q3U0K8	Prolyl 3-hydroxylase OGFOD1 OS=Mus musculus OX=10090 GN=Ogfod1 PE=1 SV=1	9.696	5.68807	101.9	87	100.5	102.6	110.1	95.2	102.6	101.6	98.6	99.8
Q7TNE3	Sperm-associated antigen 7 OS=Mus musculus OX=10090 GN=Spag7 PE=1 SV=1	9.683	10.1322	88.5	82.5	93.8	91.1	88.3	111.8	102.2	116.6	108	117
P35802	Neuronal membrane glycoprotein M6-a OS=Mus musculus OX=10090 GN=Gpm6a PE=1 SV=1	9.656	6.47482	149.9	119.9	127.5	96.2	135.9	66.6	71.9	72.5	89.5	70.1
Q9DBA9	General transcription factor IIH subunit 1 OS=Mus musculus OX=10090 GN=Gtf2h1 PE=1 SV=2	9.639	4.7532	93.8	101.5	115.3	100.5	101.4	95.6	106.8	88.1	102.6	94.6
Q8K2J7	RELT-like protein 1 OS=Mus musculus OX=10090 GN=Rell1 PE=2 SV=2	9.606	10.2941	76.6	63.1	78.7	90.8	106.4	115	117.2	109.5	129.6	113.2
Q8BK63	Casein kinase I isoform alpha OS=Mus musculus OX=10090 GN=Csnk1a1 PE=1 SV=2	9.594	5.93472	73.3	73.3	72.8	74.6	131.9	82.7	129.2	107.2	137.9	116.9
Q91WN2	Transmembrane protein 150A OS=Mus musculus OX=10090 GN=Tmem150a PE=2 SV=1	9.593	8.11808	115.4	90.3	99.2	87	111.5	93.4	90.5	100.6	112.3	99.7
Q8C3I8	Protein HGH1 homolog OS=Mus musculus OX=10090 GN=Hgh1 PE=1 SV=1	9.537	8.39695	87.3	95.5	95.6	104.2	104.3	99.4	92.5	101.7	100.4	119.1
P62305	Small nuclear ribonucleoprotein E OS=Mus musculus OX=10090 GN=Snrpe PE=1 SV=1	9.513	29.3478	66.2	87.9	75.5	92.2	76.4	129	93.3	146.5	115.7	117.3
Q8BZT5	Leucine-rich repeat-containing protein 19 OS=Mus musculus OX=10090 GN=Lrrc19 PE=1 SV=1	9.511	7.41758	115.7	102	111.1	103.7	111.9	100.5	95.8	85.1	86.7	87.3
P14404	Histone-lysine N-methyltransferase MECOM OS=Mus musculus OX=10090 GN=Mecom PE=1 SV=2	9.51	2.75974	92.3	102.5	103.2	113.1	92.8	100.4	91.5	103.8	97.7	102.7
Q0P5W1	Vacuolar protein sorting-associated protein 8 homolog OS=Mus musculus OX=10090 GN=Vps8 PE=1 SV=1	9.506	1.68185	97.2	94.6	84.9	91.6	105	97	99.7	107.3	116.7	106.1
Q8BMD6	Transmembrane protein 260 OS=Mus musculus OX=10090 GN=Tmem260 PE=2 SV=2	9.458	5.12091	105.6	87.7	108.2	93.3	106.7	86.2	89.4	101.5	114.6	106.6
Q9Z0S6	Claudin-10 OS=Mus musculus OX=10090 GN=Cldn10 PE=1 SV=2	9.443	12.5541	94.3	143.7	120.5	98.3	105.6	94.7	98.5	77.8	89.5	77.1
P13864	DNA (cytosine-5)-methyltransferase 1 OS=Mus musculus OX=10090 GN=Dnmt1 PE=1 SV=5	9.44	1.48148	77.5	83.7	85.9	83.4	89.4	102.8	104.2	125.6	126.7	120.7
Q5SXA9	Protein KIBRA OS=Mus musculus OX=10090 GN=Wwc1 PE=1 SV=1	9.437	3.17029	71.9	93.9	87.9	88.5	92.9	108.7	102.2	115	118.2	120.8
Q64676	2-hydroxyacylsphingosine 1-beta-galactosyltransferase OS=Mus musculus OX=10090 GN=Ugt8 PE=1 SV=2	9.436	4.25139	104.5	110.4	87.8	85.5	127.1	78.1	94.7	99.8	111.1	100.9
Q9JMA2	Queuine tRNA-ribosyltransferase catalytic subunit 1 OS=Mus musculus OX=10090 GN=Qtrt1 PE=1 SV=2	9.43	10.4218	92.2	95.7	95	109.9	95.1	99.4	99.9	109.9	104.3	98.7
Q148V8	Protein FAM83H OS=Mus musculus OX=10090 GN=Fam83h PE=1 SV=1	9.419	3.39123	73	83.1	72.9	100.9	79.9	122.2	92.1	122.5	119	134.5
P18608	Non-histone chromosomal protein HMG-14 OS=Mus musculus OX=10090 GN=Hmgn1 PE=1 SV=2	9.347	13.5417	71	80	69.2	109.8	82.4	122.4	122.1	109.6	131.9	101.6
Q61037	Tuberin OS=Mus musculus OX=10090 GN=Tsc2 PE=1 SV=1	9.336	3.52811	113.8	78.3	108.2	112.7	94.9	100.5	89.7	109.8	94.1	98
Q9Z0M6	Adhesion G protein-coupled receptor E5 OS=Mus musculus OX=10090 GN=Adgre5 PE=1 SV=2	9.336	4.27873	99.4	95.5	97.4	100.5	97	109.7	85.5	105.4	101.7	107.8
Q8BKE9	Intraflagellar transport protein 74 homolog OS=Mus musculus OX=10090 GN=Ift74 PE=1 SV=2	9.322	4.5	92.5	96.7	101.6	106.4	96.1	105.5	99.2	99.3	103.8	98.8
Q7SIG6	Arf-GAP with SH3 domain, ANK repeat and PH domain-containing protein 2 OS=Mus musculus OX=10090 GN=Asap2 PE=1 SV=3	9.316	2.71399	99.9	88.4	101.7	85.5	108.3	90	104.9	104.6	113.5	103.1
Q99MJ9	ATP-dependent RNA helicase DDX50 OS=Mus musculus OX=10090 GN=Ddx50 PE=2 SV=1	9.294	3.40599	81.6	91.2	84.8	101.4	99.9	91.6	81.5	116.2	140	111.8
Q9D7F7	Charged multivesicular body protein 4c OS=Mus musculus OX=10090 GN=Chmp4c PE=2 SV=1	9.288	10.7759	84	75.4	81.1	80	74.8	98	100.9	109	119.3	177.5
Q9ER39	Torsin-1A OS=Mus musculus OX=10090 GN=Tor1a PE=1 SV=1	9.278	6.30631	99	92	91.7	91.3	101.8	88.3	90.9	111.8	118.7	114.6
Q2KN98	Cytospin-A OS=Mus musculus OX=10090 GN=Specc1l PE=1 SV=1	9.264	2.77281	36.5	69.9	41.2	74.6	168	94.9	152.7	104.7	137.2	120.2
Q9D9Z5	DET1- and DDB1-associated protein 1 OS=Mus musculus OX=10090 GN=Dda1 PE=1 SV=1	9.237	18.6275	91.2	83.8	89.9	97.4	87.5	120.2	106.1	106.5	105.1	112.2
Q3TL26	Dimethyladenosine transferase 2, mitochondrial OS=Mus musculus OX=10090 GN=Tfb2m PE=2 SV=1	9.224	7.32323	165.1	87.3	105.1	138.1	115.6	74.8	72.2	68.7	91.5	81.5
Q8R3T5	Syntaxin-binding protein 6 OS=Mus musculus OX=10090 GN=Stxbp6 PE=1 SV=1	9.21	9.52381	88.1	101.8	97.9	106.5	103.7	102.1	93.7	98.8	100.6	106.9
P19182	Interferon-related developmental regulator 1 OS=Mus musculus OX=10090 GN=Ifrd1 PE=1 SV=2	9.18	7.12695	96.1	82.4	92.1	95.7	87.1	94.5	93.1	112.7	122.1	124.4
Q8VDP6	CDP-diacylglycerol--inositol 3-phosphatidyltransferase OS=Mus musculus OX=10090 GN=Cdipt PE=1 SV=1	9.176	9.85915	59.1	184.8	57.8	184	136.4	72.6	87	62.7	91.3	64.4
Q8VED9	Galectin-related protein OS=Mus musculus OX=10090 GN=Lgalsl PE=1 SV=1	9.173	26.1628	102.8	108.1	112.5	106.5	117.8	87.9	111.5	76.8	93	83
Q6SKR2	Methyltransferase N6AMT1 OS=Mus musculus OX=10090 GN=N6amt1 PE=1 SV=1	9.159	9.34579	97.2	120.2	131.9	101.6	98.8	78.2	110	79.7	86.2	96.1
P23881	Transcription elongation factor A protein 3 OS=Mus musculus OX=10090 GN=Tcea3 PE=1 SV=3	9.141	5.4755	147.4	97.2	135.8	115.4	115	79.3	73.2	75.3	77.8	83.7
Q91WI7	KICSTOR complex protein ITFG2 OS=Mus musculus OX=10090 GN=Itfg2 PE=2 SV=1	9.106	5.41761	102.1	92.7	100.4	101.4	99.4	88.5	107.6	97.5	107	103.3
Q60805	Tyrosine-protein kinase Mer OS=Mus musculus OX=10090 GN=Mertk PE=1 SV=1	9.084	2.61569	121	99.3	101.9	88.9	115	83.9	96.6	94.5	100.4	98.6
Q9D8M4	60S ribosomal protein L7-like 1 OS=Mus musculus OX=10090 GN=Rpl7l1 PE=1 SV=1	8.998	13.0081	65.5	73	71.8	100	68.9	144.9	77.3	144.9	117.1	136.5
Q99PP7	E3 ubiquitin-protein ligase TRIM33 OS=Mus musculus OX=10090 GN=Trim33 PE=1 SV=2	8.945	1.40105	98.3	94.3	98.4	98.3	98.7	113.9	110.5	89.7	101	96.9
P70261	Paladin OS=Mus musculus OX=10090 GN=Pald1 PE=1 SV=1	8.932	4.30733	88.7	82.2	92.5	83.3	109	93.4	97.1	125.1	118	110.6
Q9CQY2	RNA guanine-N7 methyltransferase activating subunit OS=Mus musculus OX=10090 GN=Ramac PE=3 SV=1	8.903	23.5294	98.2	106.1	96.7	100.7	84.1	123.5	95.7	100.8	91.6	102.6
O70481	E3 ubiquitin-protein ligase UBR1 OS=Mus musculus OX=10090 GN=Ubr1 PE=1 SV=2	8.883	1.65054	127.5	97.4	127.5	96.8	104.5	82.9	87.4	92.5	94.9	88.6
P62509	Estrogen-related receptor gamma OS=Mus musculus OX=10090 GN=Esrrg PE=1 SV=1	8.872	4.14847	121.4	113.7	121.9	111.1	128.5	71.2	62.2	88.4	93	88.6
Q8CFE3	REST corepressor 1 OS=Mus musculus OX=10090 GN=Rcor1 PE=1 SV=3	8.865	5.83333	78.3	90.7	81	99.6	86.4	118.3	96.5	116.9	106.1	126.1
Q5SF07	Insulin-like growth factor 2 mRNA-binding protein 2 OS=Mus musculus OX=10090 GN=Igf2bp2 PE=1 SV=1	8.815	3.37838	81.5	84.6	87.1	105.6	89.4	105.7	103.7	112.5	115.8	114.1
Q9WU00	Nuclear respiratory factor 1 OS=Mus musculus OX=10090 GN=Nrf1 PE=1 SV=2	8.786	3.97614	73.6	83.8	79.9	94.5	90	131.9	110.2	116	106.4	113.7
Q8BT51	Cytochrome c oxidase assembly factor 4 homolog, mitochondrial OS=Mus musculus OX=10090 GN=COA4 PE=3 SV=1	8.779	21.8391	110.3	103.9	105.4	111.5	99.7	101.7	92.6	88.9	94.9	91.2
Q9CRC6	BLOC-1-related complex subunit 7 OS=Mus musculus OX=10090 GN=Borcs7 PE=1 SV=1	8.772	25.7143	91.3	88.5	99	107.1	101.7	107.9	99.3	94	102.5	108.7
Q9ER81	Torsin-1A-interacting protein 2, isoform IFRG15 OS=Mus musculus OX=10090 GN=Tor1aip2 PE=1 SV=1	8.762	25.1908	87.4	83.8	87.6	91.4	86.4	109.5	111.8	116.8	113.3	111.9
Q9D009	Putative lipoyltransferase 2, mitochondrial OS=Mus musculus OX=10090 GN=Lipt2 PE=1 SV=2	8.755	15.1515	88.4	116	94.1	98.6	98.1	103.1	96.3	114	98.6	92.8
Q6TXD4	Dynamin-binding protein OS=Mus musculus OX=10090 GN=Dnmbp PE=1 SV=2	8.75	2.21519	113.9	80.3	108.1	95.8	104.6	90.7	83.1	83.3	135.1	105.1
Q91ZF0	DnaJ homolog subfamily C member 24 OS=Mus musculus OX=10090 GN=Dnajc24 PE=1 SV=4	8.743	12.8378	84.2	95.9	92	103.9	93.1	113.8	100	103.6	105.3	108.1
O08688	Calpain-5 OS=Mus musculus OX=10090 GN=Capn5 PE=1 SV=1	8.704	4.84375	88.8	85.3	92.1	75.7	98.4	84.2	96.4	123.3	130.1	125.8
Q6P8I6	Cytochrome c oxidase assembly protein COX11, mitochondrial OS=Mus musculus OX=10090 GN=Cox11 PE=1 SV=1	8.69	8.72727	129.7	103.5	114.6	107.2	115.9	89.9	76.1	85	93.6	84.4
Q9CQ86	Migration and invasion enhancer 1 OS=Mus musculus OX=10090 GN=Mien1 PE=1 SV=1	8.676	8.69565	143.8	107.6	136.5	90.9	114.4	69	95.8	74.6	79.1	88.3
Q9JKV5	Secretory carrier-associated membrane protein 4 OS=Mus musculus OX=10090 GN=Scamp4 PE=1 SV=1	8.591	8.26087	112.2	88.3	99.6	74.4	105.3	78.1	100.1	103.8	132.6	105.7
Q80VP5	Mitochondrial translation release factor in rescue OS=Mus musculus OX=10090 GN=Mtrfr PE=1 SV=1	8.59	9.78261	115.3	101.9	113.8	115.6	93.5	80.9	88.5	92.1	99.2	99.2
Q8BUG2	Beta-Ala-His dipeptidase OS=Mus musculus OX=10090 GN=Cndp1 PE=2 SV=1	8.587	4.06504	96.2	93.2	92.7	96.2	108.5	102.7	99	101.4	100.7	109.4
Q6P9Q4	FH1/FH2 domain-containing protein 1 OS=Mus musculus OX=10090 GN=Fhod1 PE=1 SV=3	8.582	1.83793	99.8	85.9	90.1	86.9	102.7	96.6	90.8	113	118.8	115.5
Q8BJU2	Tetraspanin-9 OS=Mus musculus OX=10090 GN=Tspan9 PE=1 SV=1	8.534	11.7155	150.7	90.7	100	108.7	95.7	84.6	99.1	82.4	96.7	91.5
Q3USJ8	F-BAR and double SH3 domains protein 2 OS=Mus musculus OX=10090 GN=Fchsd2 PE=1 SV=2	8.521	4.05405	90.6	96.4	88.3	104.6	95.4	110.4	95.5	108.9	102.1	107.7
Q8BK62	Olfactomedin-like protein 3 OS=Mus musculus OX=10090 GN=Olfml3 PE=2 SV=2	8.497	4.6798	85.2	129.2	101.6	95.5	103.2	115.4	86.1	105.3	80	98.5
Q9D902	General transcription factor IIE subunit 2 OS=Mus musculus OX=10090 GN=Gtf2e2 PE=1 SV=2	8.486	8.90411	92.8	91.2	93	98.2	102.2	106.3	96.2	97.3	99.2	123.6
Q61146	Occludin OS=Mus musculus OX=10090 GN=Ocln PE=1 SV=1	8.479	7.10173	78.5	84.4	90.6	101.8	95.6	115.4	91.8	114.2	112.1	115.7
Q9CQU3	Protein RER1 OS=Mus musculus OX=10090 GN=Rer1 PE=1 SV=1	8.47	8.67347	118.3	97	113.7	83.1	120.3	74.5	86.3	96.6	111.6	98.6
Q61176	Arginase-1 OS=Mus musculus OX=10090 GN=Arg1 PE=1 SV=1	8.468	8.04954	73.7	91.1	139	95	83.8	93	89.5	146.7	92.3	95.9
Q8R3N1	Nucleolar protein 14 OS=Mus musculus OX=10090 GN=Nop14 PE=1 SV=2	8.459	2.09302	105.6	107.3	98.6	103.8	92.1	97.6	85.9	100.8	103.8	104.5
Q3UPL5	Uncharacterized protein C11orf96 homolog OS=Mus musculus OX=10090 GN=Ag2 PE=1 SV=2	8.445	7.63052	62.9	53.2	56.7	50.8	63.8	155.9	147	130.2	137.4	142.2
P56183	Ribosomal RNA processing protein 1 homolog A OS=Mus musculus OX=10090 GN=Rrp1 PE=1 SV=2	8.435	3.84615	83.6	72.9	69.4	91	87.2	90.4	105.3	135.7	144.7	120
Q8BXQ2	GPI transamidase component PIG-T OS=Mus musculus OX=10090 GN=Pigt PE=1 SV=2	8.403	3.78007	109.8	91.1	96	79.5	117.1	75.8	92.6	117	119.1	102.1
Q61624	Zinc finger protein 148 OS=Mus musculus OX=10090 GN=Znf148 PE=1 SV=2	8.376	2.39295	123.1	81.3	112.3	125.6	76.1	103.2	81.4	98.2	85	113.7
P56212	cAMP-regulated phosphoprotein 19 OS=Mus musculus OX=10090 GN=Arpp19 PE=1 SV=2	8.351	23.2143	107.2	103.6	126.6	103	88.2	91.2	99.8	84.2	91.5	104.8
Q5XF89	Polyamine-transporting ATPase 13A3 OS=Mus musculus OX=10090 GN=Atp13a3 PE=1 SV=1	8.342	1.72272	94.7	76.3	80.7	86.1	114.8	90.7	112.3	109.3	123.8	111.4
Q61062	Segment polarity protein dishevelled homolog DVL-3 OS=Mus musculus OX=10090 GN=Dvl3 PE=1 SV=2	8.334	3.07263	95.8	100.6	99.8	102.2	99	95.5	94.3	100.4	101.6	110.8
D3YZG8	Probable bifunctional methylenetetrahydrofolate dehydrogenase/cyclohydrolase 2 OS=Mus musculus OX=10090 GN=Mthfd2l PE=3 SV=1	8.318	8.28402	94.7	105.2	104.2	104.1	106.5	92.8	102.6	95.5	94	100.5
Q8VEG4	Exonuclease 3'-5' domain-containing protein 2 OS=Mus musculus OX=10090 GN=Exd2 PE=1 SV=2	8.257	3.84615	100.9	94.8	95.3	94	98.9	90.7	96.1	111.4	112.8	105.1
Q9CXE2	B-cell CLL/lymphoma 7 protein family member A OS=Mus musculus OX=10090 GN=Bcl7a PE=2 SV=1	8.234	8.57143	102.9	107.9	104.7	121.9	85.3	104.6	86.3	99	87.7	99.6
Q8BGS7	Choline/ethanolaminephosphotransferase 1 OS=Mus musculus OX=10090 GN=Cept1 PE=1 SV=1	8.23	7.45192	101.5	78.2	107.1	78.1	98.3	78.5	85.2	127.9	134.2	111.1
Q8K4K6	Pantothenate kinase 1 OS=Mus musculus OX=10090 GN=Pank1 PE=1 SV=1	8.218	4.19708	118.1	93.4	98.5	96.3	113.1	87.7	93	93	111.4	95.5
Q91VU6	DDB1- and CUL4-associated factor 11 OS=Mus musculus OX=10090 GN=Dcaf11 PE=1 SV=1	8.212	3.46084	103.1	109.4	101	109.7	115.6	90.1	92.7	90.1	95.9	92.3
Q8R3K3	Pentatricopeptide repeat-containing protein 2, mitochondrial OS=Mus musculus OX=10090 GN=Ptcd2 PE=1 SV=1	8.197	6.82415	98.8	97.1	106.7	99.7	112.5	92.3	90.3	96.5	110	96
Q8BMD5	Cytidine and dCMP deaminase domain-containing protein 1 OS=Mus musculus OX=10090 GN=Cdadc1 PE=2 SV=1	8.184	4.58891	87.7	85	94.9	108.2	102.5	109.5	100.8	104.4	99	107.8
P43136	Nuclear receptor subfamily 2 group F member 6 OS=Mus musculus OX=10090 GN=Nr2f6 PE=1 SV=2	8.175	6.41026	106.9	109.4	100.4	98.4	101.5	83.3	87.4	100.5	104.3	108
P59759	Myocardin-related transcription factor B OS=Mus musculus OX=10090 GN=Mrtfb PE=1 SV=1	8.167	3.05556	97.4	87.1	100.9	105	101.9	100.5	95.3	104	101.6	106.2
Q99MQ1	Protein bicaudal C homolog 1 OS=Mus musculus OX=10090 GN=Bicc1 PE=1 SV=1	8.123	1.84237	109.6	113	99.4	128.5	92.7	92.7	93.3	90	91.6	89.2
Q3U4G3	Xyloside xylosyltransferase 1 OS=Mus musculus OX=10090 GN=Xxylt1 PE=1 SV=2	8.106	7.39796	110.9	94.6	100.6	96	99.5	91.5	85.7	108.6	103.8	108.9
Q9CQI9	Mediator of RNA polymerase II transcription subunit 30 OS=Mus musculus OX=10090 GN=Med30 PE=1 SV=1	8.093	8.98876	84.6	94.1	89.2	94.4	92.3	104.6	100.2	108.4	115.7	116.6
Q921N8	G protein pathway suppressor 2 OS=Mus musculus OX=10090 GN=Gps2 PE=1 SV=1	8.075	6.72783	85.3	89	90.2	93.9	85.5	115.9	114.1	108.1	109	109
Q9CQW9	Interferon-induced transmembrane protein 3 OS=Mus musculus OX=10090 GN=Ifitm3 PE=1 SV=1	8.075	20.438	80.1	78.6	90.8	78.2	102.4	95.7	112.3	115.8	131.8	114.5
Q62028	Secretory phospholipase A2 receptor OS=Mus musculus OX=10090 GN=Pla2r1 PE=1 SV=1	7.998	1.14324	97.7	76.6	81.3	99.9	87.7	107.1	93.1	116.8	118.6	121.2
O55236	mRNA-capping enzyme OS=Mus musculus OX=10090 GN=Rngtt PE=1 SV=1	7.982	2.84757	79.9	102.9	93.9	87.5	94.9	93.3	98.7	122.2	121.7	104.9
Q8CI61	BAG family molecular chaperone regulator 4 OS=Mus musculus OX=10090 GN=Bag4 PE=1 SV=2	7.981	4.59519	71.7	98.3	75.7	90.7	85	173.5	114.3	112.7	79.8	98.2
P97465	Docking protein 1 OS=Mus musculus OX=10090 GN=Dok1 PE=1 SV=2	7.969	7.46888	84.5	83.4	87.2	96.2	83.9	108.6	101.4	125.8	111	117.9
P58283	E3 ubiquitin-protein ligase RNF216 OS=Mus musculus OX=10090 GN=Rnf216 PE=1 SV=3	7.963	2.93083	94.3	98.2	98	117.4	103.1	94.4	70.8	111.1	106.6	106
Q9CRB0	Sorting nexin-24 OS=Mus musculus OX=10090 GN=Snx24 PE=1 SV=1	7.927	16.568	95.6	97.4	89.1	100.5	87.2	94.2	94.1	106.2	126	109.7
Q9R1S3	GPI ethanolamine phosphate transferase 1 OS=Mus musculus OX=10090 GN=Pign PE=2 SV=2	7.903	3.43716	102.5	72.6	92.6	83.3	107.1	84.9	84.8	104.5	127.2	140.5
Q9CZU4	GTPase Era, mitochondrial OS=Mus musculus OX=10090 GN=Eral1 PE=2 SV=1	7.9	8.46682	117.6	82.7	113.2	127.2	98.8	94.8	82.7	85.9	99.8	97.2
Q64687	Alpha-N-acetylneuraminide alpha-2,8-sialyltransferase OS=Mus musculus OX=10090 GN=St8sia1 PE=1 SV=2	7.893	6.19718	94.4	100.6	100.5	99.2	108.9	102.2	96.1	103.8	100.1	94.3
Q923G2	DNA-directed RNA polymerases I, II, and III subunit RPABC3 OS=Mus musculus OX=10090 GN=Polr2h PE=1 SV=3	7.883	15.3333	87.5	92	89.7	98.7	91.8	112	108.2	109.7	104.3	106.1
Q91X43	SH3 domain-containing protein 19 OS=Mus musculus OX=10090 GN=Sh3d19 PE=1 SV=2	7.851	3.5488	94	79.9	84.4	107.9	84.6	106.1	85.9	120.5	111.2	125.6
Q9D113	DNL-type zinc finger protein OS=Mus musculus OX=10090 GN=Dnlz PE=1 SV=1	7.846	12.4294	100.7	116	120.8	120	94	99.5	85.7	94.7	80.3	88.3
Q6QD59	Vesicle transport protein SEC20 OS=Mus musculus OX=10090 GN=Bnip1 PE=1 SV=1	7.838	9.64912	120.3	84.9	108.7	101.4	101.1	84.2	75.5	101.1	114.7	108.1
Q6NZA9	Transcription initiation factor TFIID subunit 9B OS=Mus musculus OX=10090 GN=Taf9b PE=1 SV=2	7.82	7.22892	89.8	96.2	94.8	91.3	94.2	107	115.6	99.8	101.6	109.7
Q9D115	Zinc finger protein 706 OS=Mus musculus OX=10090 GN=Znf706 PE=1 SV=1	7.816	23.6842	122.9	117.9	107.1	125.5	107.7	79.5	75.5	86.9	89	88.1
Q8CJ61	CKLF-like MARVEL transmembrane domain-containing protein 4 OS=Mus musculus OX=10090 GN=Cmtm4 PE=1 SV=1	7.765	9.13462	120.2	83.1	94.5	71.9	101.2	79.3	108.5	106.3	124.2	110.8
Q91W52	Transmembrane protein 19 OS=Mus musculus OX=10090 GN=Tmem19 PE=1 SV=1	7.755	5.95238	104.2	92.5	112	76.6	126.5	66.1	95	94	124.6	108.5
Q9JMB0	G kinase-anchoring protein 1 OS=Mus musculus OX=10090 GN=Gkap1 PE=1 SV=1	7.722	4.64481	107.8	105.4	110	111.2	102.9	90	84.7	90.8	94.5	102.7
Q80YA7	Dipeptidyl peptidase 8 OS=Mus musculus OX=10090 GN=Dpp8 PE=1 SV=1	7.721	2.13004	101.8	85.4	99.4	91.6	105.7	88.1	93.3	114.4	115	105.2
Q8C0M0	GATOR complex protein WDR59 OS=Mus musculus OX=10090 GN=Wdr59 PE=1 SV=2	7.714	2.41935	85.1	94	91.4	90.6	93.8	109.7	100.4	109.6	110	115.4
Q9JL16	Interferon-stimulated gene 20 kDa protein OS=Mus musculus OX=10090 GN=Isg20 PE=1 SV=1	7.698	6	46.1	63	52.3	71.6	58.4	132.6	119.3	149.1	155.1	152.6
Q9DB94	WD repeat-containing protein 53 OS=Mus musculus OX=10090 GN=Wdr53 PE=1 SV=1	7.695	5.02793	85.8	78.6	77.2	79.3	110	103.6	121.7	108.8	82.6	152.4
Q9QZ73	DCN1-like protein 1 OS=Mus musculus OX=10090 GN=Dcun1d1 PE=2 SV=1	7.661	5.79151	101.3	89	95.9	88.7	109.1	88.1	100.2	103.9	111.8	112
Q99KL7	Ras-related protein Rab-28 OS=Mus musculus OX=10090 GN=Rab28 PE=1 SV=1	7.651	8.1448	86.7	87	89.1	93.3	93.6	111	105.2	117.2	106.7	110.1
Q99J62	Replication factor C subunit 4 OS=Mus musculus OX=10090 GN=Rfc4 PE=1 SV=1	7.646	7.96703	89.4	94.6	93.4	93.5	86.5	120	100.2	107	112.4	102.9
Q9DAZ9	Abscission/NoCut checkpoint regulator OS=Mus musculus OX=10090 GN=Zfyve19 PE=1 SV=2	7.625	4.62725	86.1	97.1	91.8	102.3	90.7	114.6	102.8	106.8	96.7	111
Q9CXU0	Mediator of RNA polymerase II transcription subunit 10 OS=Mus musculus OX=10090 GN=Med10 PE=1 SV=1	7.58	17.7778	80.4	97.1	95.8	104.7	93.1	102	95.9	107.2	111.6	112.2
P63154	Crooked neck-like protein 1 OS=Mus musculus OX=10090 GN=Crnkl1 PE=1 SV=1	7.574	3.18841	77.9	97.8	89.4	89.1	94.3	104.9	103.1	116	109.3	118.1
Q8CDM8	FHF complex subunit HOOK interacting protein 2A OS=Mus musculus OX=10090 GN=Fhip2a PE=1 SV=2	7.562	2.87958	92.2	85.2	95.6	96	100.8	98	97.9	114.2	110.2	109.9
O88593	Peptidoglycan recognition protein 1 OS=Mus musculus OX=10090 GN=Pglyrp1 PE=1 SV=1	7.555	16.4835	76.4	74.7	71.9	90.2	65.7	131.4	118.6	136.5	108.3	126.4
Q9R0P4	Small acidic protein OS=Mus musculus OX=10090 GN=Smap PE=1 SV=1	7.549	7.73481	94.5	74.1	79.3	72	75.1	129.7	128.7	119.8	93	133.9
Q91W53	Golgin subfamily A member 7 OS=Mus musculus OX=10090 GN=Golga7 PE=1 SV=1	7.546	16.7883	98.9	96.7	106.8	92.4	96.8	96.6	96.7	101.5	111.2	102.5
Q3U276	Succinate dehydrogenase assembly factor 1, mitochondrial OS=Mus musculus OX=10090 GN=Sdhaf1 PE=1 SV=1	7.543	12.7119	110.5	100	97.7	112.5	102.4	96.2	88.9	95.2	94.4	102.2
Q9JJK5	Homocysteine-responsive endoplasmic reticulum-resident ubiquitin-like domain member 1 protein OS=Mus musculus OX=10090 GN=Herpud1 PE=1 SV=1	7.537	6.64962	84.6	99.1	95.3	115.4	143.9	94.3	110.2	79.9	90.5	86.7
Q9JJD0	THAP domain-containing protein 11 OS=Mus musculus OX=10090 GN=Thap11 PE=1 SV=1	7.536	5.57377	90.7	103.3	101.4	99.6	94.9	117.8	110.4	92	93.2	96.6
E9Q784	Zinc finger CCCH domain-containing protein 13 OS=Mus musculus OX=10090 GN=Zc3h13 PE=1 SV=1	7.503	0.983227	88.2	91.2	89.1	98.9	88.2	113.8	87.5	110.8	108.8	123.5
Q9Z0R9	Acyl-CoA 6-desaturase OS=Mus musculus OX=10090 GN=Fads2 PE=1 SV=1	7.503	6.75676	108.4	91.8	123.1	96.6	126.3	78.4	80.2	99.1	94	102.1
P83877	Thioredoxin-like protein 4A OS=Mus musculus OX=10090 GN=Txnl4a PE=1 SV=1	7.502	19.0141	105.9	104	98.2	99.3	96.4	102.2	101.5	106.4	92.2	93.8
Q9D0I8	mRNA turnover protein 4 homolog OS=Mus musculus OX=10090 GN=Mrto4 PE=1 SV=1	7.499	7.53138	90.8	87.8	90.3	80.3	109.7	97.3	105.2	112.4	113.1	113
Q8BX94	Oxysterol-binding protein-related protein 2 OS=Mus musculus OX=10090 GN=Osbpl2 PE=1 SV=1	7.476	5.57851	84.6	81.4	90.8	75	94.4	94.5	120.6	116.5	120.6	121.6
Q6ZPR6	Inhibitor of Bruton tyrosine kinase OS=Mus musculus OX=10090 GN=Ibtk PE=1 SV=3	7.471	1.99704	85.1	84	86	84.7	86.3	117.4	120.1	110.6	121.5	104.4
Q99N89	39S ribosomal protein L43, mitochondrial OS=Mus musculus OX=10090 GN=Mrpl43 PE=1 SV=1	7.426	9.83607	100.4	122.4	112.5	118.9	102.1	94	85.5	86	89.9	88.4
Q62394	Zinc finger protein 185 OS=Mus musculus OX=10090 GN=Znf185 PE=1 SV=1	7.413	4.26136	79.5	79.3	92.4	97.4	80.1	100.1	140.6	124.9	101.6	104
Q08376	Zinc finger and BTB domain-containing protein 14 OS=Mus musculus OX=10090 GN=Zbtb14 PE=2 SV=1	7.4	4.89978	115.3	109.8	127.8	83.6	97	85	92.1	93.2	99.4	96.7
Q6P4T0	Autophagy-related protein 2 homolog A OS=Mus musculus OX=10090 GN=Atg2a PE=1 SV=2	7.377	0.888192	110.3	88.1	97.3	97.7	100.4	88.1	83.4	100.3	112.2	122.2
Q9D937	Uncharacterized protein C11orf98 homolog OS=Mus musculus OX=10090 PE=1 SV=1	7.359	13.8211	102.4	109.5	69.8	161.4	70.2	104.6	146.1	73.5	67.7	94.7
Q8VDG3	Poly(A)-specific ribonuclease PARN OS=Mus musculus OX=10090 GN=Parn PE=1 SV=1	7.352	3.20513	87.6	89.7	90.9	82.8	96	105.1	116	108.4	111.8	111.8
Q80U28	MAP kinase-activating death domain protein OS=Mus musculus OX=10090 GN=Madd PE=1 SV=2	7.334	2.15599	120.7	84.7	115.3	67.1	124.1	81.4	135.7	74.3	112.2	84.5
Q8BJ90	Zinc finger protein 771 OS=Mus musculus OX=10090 GN=Znf771 PE=2 SV=1	7.314	7.25552	88	82.6	98.9	96.6	101.7	110.2	94.9	108	109	110.1
Q8K2F8	Protein LSM14 homolog A OS=Mus musculus OX=10090 GN=Lsm14a PE=1 SV=1	7.303	9.95671	75.4	87.7	86.7	100.8	97.3	114.5	107.6	114	104.3	111.7
Q8BU04	Putative E3 ubiquitin-protein ligase UBR7 OS=Mus musculus OX=10090 GN=Ubr7 PE=1 SV=1	7.297	4	93.8	95.9	91	95.6	86.1	114.8	103.8	111.1	98.9	109
Q9ET30	Transmembrane 9 superfamily member 3 OS=Mus musculus OX=10090 GN=Tm9sf3 PE=1 SV=1	7.281	2.72572	135.8	94.5	114.4	67.9	123.4	64.3	88.5	98.9	129.1	83.3
Q9CZE3	Ras-related protein Rab-32 OS=Mus musculus OX=10090 GN=Rab32 PE=1 SV=3	7.269	8.52018	102.8	95.7	88.4	95.6	105.2	90.1	94.2	108	113.4	106.7
Q5FWI3	Cell surface hyaluronidase OS=Mus musculus OX=10090 GN=Cemip2 PE=1 SV=1	7.228	2.09689	91.5	79.1	83.8	78.1	93.8	107.5	113.3	121.1	116.6	115.1
Q8R2T8	General transcription factor 3C polypeptide 5 OS=Mus musculus OX=10090 GN=Gtf3c5 PE=2 SV=2	7.218	3.46154	86.1	111.3	90.1	120.8	92.8	113.2	97.1	93.6	97	98
Q8K3J9	G-protein coupled receptor family C group 5 member C OS=Mus musculus OX=10090 GN=Gprc5c PE=1 SV=2	7.207	4.54545	121.3	87.4	123.9	81.6	109.6	75.9	98.5	94.1	108.2	99.5
P08032	Spectrin alpha chain, erythrocytic 1 OS=Mus musculus OX=10090 GN=Spta1 PE=1 SV=3	7.205	1.36646	87.9	95.2	89.1	108.9	92	114.9	89.9	105.4	98.7	118
Q9D9H8	UPF0565 protein C2orf69 homolog OS=Mus musculus OX=10090 PE=2 SV=3	7.178	6.30137	101.3	95.1	105.2	99.6	93.5	103.9	91.1	98.6	97.3	114.3
P16882	Growth hormone receptor OS=Mus musculus OX=10090 GN=Ghr PE=1 SV=1	7.157	2.61538	114.7	109.4	110.5	108.1	112.3	79.3	70.8	94.6	97.9	102.5
Q8CHQ0	F-box only protein 4 OS=Mus musculus OX=10090 GN=Fbxo4 PE=1 SV=2	7.145	4.93506	93.8	85.2	82.2	86.9	95.4	92.5	95	123.8	123.9	121.2
Q8C729	Protein FAM126B OS=Mus musculus OX=10090 GN=Fam126b PE=1 SV=1	7.136	3.77358	97.6	82.8	90.8	83.1	113.4	94	94.5	112	124.3	107.5
Q02496	Mucin-1 OS=Mus musculus OX=10090 GN=Muc1 PE=1 SV=2	7.113	2.69841	73.9	64.3	75.5	74.7	68.5	122.8	127.6	165.7	113.8	113.3
P63213	Guanine nucleotide-binding protein G(I)/G(S)/G(O) subunit gamma-2 OS=Mus musculus OX=10090 GN=Gng2 PE=1 SV=2	7.103	19.7183	98.8	116.9	102.2	98.3	97.3	107.5	109.9	100.8	81.5	86.7
Q3V1V3	ESF1 homolog OS=Mus musculus OX=10090 GN=Esf1 PE=1 SV=1	7.065	1.42012	89.9	96.5	95.8	104.1	83.2	107.8	100.5	106.7	104.4	111.1
Q8BHZ4	Zinc finger protein 592 OS=Mus musculus OX=10090 GN=Znf592 PE=1 SV=3	7.053	1.18859	88.6	102.7	103.6	101.9	90.5	113.1	107.4	96.3	93.6	102.4
Q9CWS4	Integrator complex subunit 11 OS=Mus musculus OX=10090 GN=Ints11 PE=1 SV=1	7.03	6.66667	114.6	83.1	113.9	81.5	108.8	88.7	85.3	102.8	114.5	106.8
Q8BHC9	Alpha-(1,3)-fucosyltransferase 11 OS=Mus musculus OX=10090 GN=Fut11 PE=1 SV=1	7.005	3.47648	82.1	115.8	104.1	111.9	93.5	112.8	94.2	102.4	88.3	94.8
Q64455	Receptor-type tyrosine-protein phosphatase eta OS=Mus musculus OX=10090 GN=Ptprj PE=1 SV=2	6.969	2.18094	83.3	88.4	95.2	82.4	94.9	103.5	110.2	105.2	119.7	117.2
Q505D1	Serine/threonine-protein phosphatase 6 regulatory ankyrin repeat subunit A OS=Mus musculus OX=10090 GN=Ankrd28 PE=1 SV=1	6.944	2.37417	95.3	87.7	103	86.1	102	84.3	89.8	115.4	119.6	116.7
Q8BU11	TOX high mobility group box family member 4 OS=Mus musculus OX=10090 GN=Tox4 PE=1 SV=3	6.938	2.74637	64	73.7	67.4	74	69.8	124	109.8	162.3	138.6	116.4
Q80VA0	N-acetylgalactosaminyltransferase 7 OS=Mus musculus OX=10090 GN=Galnt7 PE=1 SV=2	6.935	2.89193	102.7	103.1	100.2	98.9	98.7	98.5	89.8	104.3	104.7	99.1
P46414	Cyclin-dependent kinase inhibitor 1B OS=Mus musculus OX=10090 GN=Cdkn1b PE=1 SV=2	6.924	9.64467	82.2	93.4	89.9	106.2	89.1	117.3	101	120.8	91.9	108.2
P70255	Nuclear factor 1 C-type OS=Mus musculus OX=10090 GN=Nfic PE=1 SV=1	6.897	7.97267	95.5	88.2	90	90.8	108.6	98.8	90.7	105.8	122	109.6
P49183	Deoxyribonuclease-1 OS=Mus musculus OX=10090 GN=Dnase1 PE=1 SV=2	6.896	5.98592	152.6	105.7	123.8	143.8	169.6	59	74.1	57	56.8	57.6
Q9DCT6	Chromatin complexes subunit BAP18 OS=Mus musculus OX=10090 GN=Bap18 PE=1 SV=1	6.891	11.6959	85.2	99.7	83.6	96.7	85.4	116.2	97.8	106	107	122.5
Q3TWL2	Type 1 phosphatidylinositol 4,5-bisphosphate 4-phosphatase OS=Mus musculus OX=10090 GN=Pip4p1 PE=1 SV=1	6.889	10.2113	89	87.9	100.8	96.7	94.9	107	100.5	113.1	103.2	106.9
O54825	Bystin OS=Mus musculus OX=10090 GN=Bysl PE=1 SV=3	6.876	3.89908	74.1	76.8	82.9	78.4	108.4	111.7	102.5	108.9	139.5	116.6
Q8CB77	Elongin-A OS=Mus musculus OX=10090 GN=Eloa PE=1 SV=3	6.865	2.19922	94.8	104.2	98	100.9	91.3	106	105.2	100.2	96.9	102.5
Q9D727	Uncharacterized protein C6orf226 homolog OS=Mus musculus OX=10090 PE=1 SV=1	6.864	15.7895	103.8	75.9	93.4	88.9	85.9	124.2	98.4	110.2	110.4	109
Q4FZF3	Probable ATP-dependent RNA helicase DDX49 OS=Mus musculus OX=10090 GN=Ddx49 PE=2 SV=1	6.848	3.33333	212.7	118.2	208.8	55.9	106.5	49.3	77.9	51	65.3	54.3
Q8BHN7	Uncharacterized protein C12orf29 homolog OS=Mus musculus OX=10090 PE=2 SV=1	6.785	5.50459	99.5	100.9	98.8	94.7	103.3	94.4	101	103.5	103.4	100.7
Q91WE2	PSME3-interacting protein OS=Mus musculus OX=10090 GN=Psme3ip1 PE=1 SV=1	6.769	6.69291	83.7	91	87.6	98.7	85.3	122.3	104.1	110.7	105.1	111.5
Q6QI06	Rapamycin-insensitive companion of mTOR OS=Mus musculus OX=10090 GN=Rictor PE=1 SV=2	6.736	0.87822	99.9	83	106.6	86.3	104.6	75.6	107.8	98.5	126.7	111.1
Q6PGD0	All-trans retinoic acid-induced differentiation factor OS=Mus musculus OX=10090 GN=Atraid PE=2 SV=2	6.71	7.17489	100.6	95.8	97.5	98.2	102.8	97.8	96.9	110.3	101.1	99.1
Q5SVD0	Refilin-B OS=Mus musculus OX=10090 GN=Rflnb PE=1 SV=1	6.705	12.5	82	100.4	91.8	103.9	95.8	106.4	106.6	100.1	118.4	94.6
A2ASS6	Titin OS=Mus musculus OX=10090 GN=Ttn PE=1 SV=1	6.671	0.105075	119.3	102.3	82.2	102.8	92.5	107.5	71.3	114.5	95.8	111.7
P61600	N-alpha-acetyltransferase 20 OS=Mus musculus OX=10090 GN=Naa20 PE=1 SV=1	6.609	14.6067	90.3	87	90	92.5	104.6	100.2	98.4	100.1	106.5	130.4
Q4KL35	PDZ domain-containing protein MAGIX OS=Mus musculus OX=10090 GN=Magix PE=1 SV=1	6.598	5.24691	101.4	108.5	108.9	114.4	99.9	101.3	90.3	90	89.2	96.2
O88839	Disintegrin and metalloproteinase domain-containing protein 15 OS=Mus musculus OX=10090 GN=Adam15 PE=1 SV=2	6.557	3.81944	106.9	95.4	101.9	79.9	111.6	83.6	98.8	96.9	114.8	110.1
Q8CGU1	Calcium-binding and coiled-coil domain-containing protein 1 OS=Mus musculus OX=10090 GN=Calcoco1 PE=1 SV=2	6.52	3.03907	71.6	86.8	84.5	84.4	81.3	150.7	141.9	95.9	105.5	97.4
Q8C9S4	Coiled-coil domain-containing protein 186 OS=Mus musculus OX=10090 GN=Ccdc186 PE=1 SV=2	6.519	2.50818	79.8	95	85.6	101.5	85.4	115.7	102.3	111.3	109.9	113.7
Q61189	Methylosome subunit pICln OS=Mus musculus OX=10090 GN=Clns1a PE=1 SV=1	6.489	10.5932	89.7	116	98.4	106.8	95.4	101.4	102	102.9	87.8	99.6
G3XA59	Transforming growth factor beta activator LRRC32 OS=Mus musculus OX=10090 GN=Lrrc32 PE=1 SV=1	6.485	2.71493	153.6	62.2	103.5	117.9	82.1	90.8	84.1	85.6	118.4	101.8
Q8CJ19	[F-actin]-monooxygenase MICAL3 OS=Mus musculus OX=10090 GN=Mical3 PE=1 SV=2	6.484	1.00351	71.5	80.3	76.8	86.1	118.9	111.9	107.6	102.9	117.9	126
Q91YY2	Beta-1,4-galactosyltransferase 3 OS=Mus musculus OX=10090 GN=B4galt3 PE=1 SV=1	6.481	5.56962	89.8	83.7	75.5	87	78.7	84.1	109.2	131.4	126.3	134.1
Q8BGV8	Mitochondrial dynamics protein MID51 OS=Mus musculus OX=10090 GN=Mief1 PE=1 SV=1	6.47	5.18359	105.1	91.7	106	96.5	98.3	91.6	80.7	109.8	114.3	106.1
Q9CWQ3	Mitochondrial inner membrane protease ATP23 homolog OS=Mus musculus OX=10090 GN=Atp23 PE=1 SV=1	6.467	7.9602	90.7	115.6	99.1	125.2	100.1	99.6	84.1	103.4	92	90.1
Q91YR5	eEF1A lysine and N-terminal methyltransferase OS=Mus musculus OX=10090 GN=EEF1AKNMT PE=1 SV=1	6.459	3.15186	87.2	87.6	106.7	97.1	104.6	98.7	94.3	101.2	123.4	99.3
O35144	Telomeric repeat-binding factor 2 OS=Mus musculus OX=10090 GN=Terf2 PE=1 SV=3	6.432	3.69686	87.2	110	103.1	107.8	96.5	105.6	96.4	99.1	89	105.1
Q8R5L3	Vam6/Vps39-like protein OS=Mus musculus OX=10090 GN=Vps39 PE=1 SV=1	6.407	2.48307	121.7	95	97.5	92.6	106.4	84.6	94.1	101.9	110	96.3
Q3USB7	Inactive phospholipase C-like protein 1 OS=Mus musculus OX=10090 GN=Plcl1 PE=1 SV=3	6.394	2.73723	104.9	104.5	106.9	102.8	90.3	107.9	98.2	94.2	97.7	92.7
Q8K0B2	Lysosomal cobalamin transport escort protein LMBD1 OS=Mus musculus OX=10090 GN=Lmbrd1 PE=1 SV=1	6.373	1.8622	102	81.9	88.7	72.7	95.4	88.2	102.6	122.5	128.9	117
Q99PM3	Transcription initiation factor IIA subunit 1 OS=Mus musculus OX=10090 GN=Gtf2a1 PE=1 SV=2	6.37	4.49735	86.9	97.8	93	107.2	88.1	109.9	102.9	103.6	101.1	109.4
O35516	Neurogenic locus notch homolog protein 2 OS=Mus musculus OX=10090 GN=Notch2 PE=1 SV=2	6.357	0.808734	83.7	86.2	84.6	89.8	92	106.6	92.9	133.1	112.7	118.4
Q8BU00	Zinc finger protein Pegasus OS=Mus musculus OX=10090 GN=Ikzf5 PE=2 SV=1	6.343	3.81862	87.9	76.7	79.5	101.7	83.4	121.6	102.8	117.8	110	118.6
Q9D1Q1	M-phase phosphoprotein 6 OS=Mus musculus OX=10090 GN=Mphosph6 PE=1 SV=1	6.325	9.93789	85.1	99.2	86.1	98	85.8	111.2	106.2	113.3	101.7	113.4
O70405	Serine/threonine-protein kinase ULK1 OS=Mus musculus OX=10090 GN=Ulk1 PE=1 SV=1	6.317	1.52236	74.2	76.5	83.7	76.1	74.7	137.3	119.3	109.2	124.6	124.3
Q8BZ60	Stonin-2 OS=Mus musculus OX=10090 GN=Ston2 PE=1 SV=1	6.302	1.78771	87.2	92.8	87.4	99	90.1	109.6	101.4	105.1	117.9	109.4
Q9D920	BLOC-1-related complex subunit 5 OS=Mus musculus OX=10090 GN=Borcs5 PE=1 SV=1	6.28	10.7692	109	95.8	109.4	90.4	114.5	85.7	92.6	102.9	106	93.7
P40237	CD82 antigen OS=Mus musculus OX=10090 GN=Cd82 PE=1 SV=1	6.272	7.5188	83.9	96.3	94.6	80.6	102.7	84.6	103.1	121.2	118	115
Q7TSS2	Ubiquitin-conjugating enzyme E2 Q1 OS=Mus musculus OX=10090 GN=Ube2q1 PE=1 SV=2	6.27	7.109	107.3	93.6	96	97.7	99.9	89.8	89	106.8	115.4	104.5
P53986	Monocarboxylate transporter 1 OS=Mus musculus OX=10090 GN=Slc16a1 PE=1 SV=1	6.254	5.27383	97.1	78.9	88.7	70.2	116.6	83	110.3	105	139.2	111.2
Q9CZT4	DNA-directed RNA polymerase III subunit RPC5 OS=Mus musculus OX=10090 GN=Polr3e PE=1 SV=2	6.249	2.53521	91.2	87.2	92.6	93.4	99.9	95.8	100	109	113.5	117.5
Q9DBR3	Armadillo repeat-containing protein 8 OS=Mus musculus OX=10090 GN=Armc8 PE=1 SV=2	6.249	2.526	99.9	84.9	97.2	83	101.3	86	89.8	113.7	126.9	117.2
Q8C9B9	Death-inducer obliterator 1 OS=Mus musculus OX=10090 GN=Dido1 PE=1 SV=4	6.213	1.0195	92.8	92.6	98.1	96.6	88.2	113.2	103.5	100.1	103.3	111.7
Q91WE4	UPF0729 protein C18orf32 homolog OS=Mus musculus OX=10090 PE=3 SV=1	6.19	29.1667	140.6	94.6	117.6	100.9	110.8	66.4	87.5	85.7	108.4	87.5
Q14AI6	Mitochondrial mRNA pseudouridine synthase Rpusd3 OS=Mus musculus OX=10090 GN=Rpusd3 PE=2 SV=1	6.178	4.65116	114.5	117.1	113	117.8	116.6	79	74.9	87.2	89.4	90.6
Q91WF7	Polyphosphoinositide phosphatase OS=Mus musculus OX=10090 GN=Fig4 PE=1 SV=1	6.166	1.87431	89.9	73.5	85.8	72.6	102.9	87.6	109.8	123.7	141.2	112.9
Q9DCA5	Ribosome biogenesis protein BRX1 homolog OS=Mus musculus OX=10090 GN=Brix1 PE=1 SV=3	6.162	5.66572	80.2	87.1	96.5	91.8	95.3	104.2	96.1	113.9	109.3	125.5
P97366	Ecotropic viral integration site 5 protein OS=Mus musculus OX=10090 GN=Evi5 PE=1 SV=2	6.152	2.5958	89.7	94.6	103.3	97.2	90.9	106.4	87.5	107.5	110.1	112.8
Q8CG16	Complement C1r-A subcomponent OS=Mus musculus OX=10090 GN=C1ra PE=1 SV=1	6.12	2.68741	71.6	48.2	66.5	101.2	61.5	137	110.1	129.9	109.6	164.5
Q61419	Cytidine monophosphate-N-acetylneuraminic acid hydroxylase OS=Mus musculus OX=10090 GN=Cmah PE=1 SV=1	6.114	2.94627	105.9	97	103.4	94.5	119.8	78.2	82.3	99	106.3	113.6
Q80ZV0	Ribonuclease H2 subunit B OS=Mus musculus OX=10090 GN=Rnaseh2b PE=1 SV=2	6.111	5.51948	88.9	102.1	85.1	93.8	91.2	106.8	95.5	116.6	111	109.1
P0C872	Bifunctional peptidase and (3S)-lysyl hydroxylase Jmjd7 OS=Mus musculus OX=10090 GN=Jmjd7 PE=1 SV=1	6.107	7.27848	92.4	95.6	98.5	104.2	98	91.9	89.5	105.8	107.2	116.8
Q7TMY4	THO complex subunit 7 homolog OS=Mus musculus OX=10090 GN=Thoc7 PE=1 SV=2	6.083	10.2941	90.1	94.4	95.9	112.2	94	105.7	95.9	104.1	101.4	106.3
Q8VCE1	DnaJ homolog subfamily C member 28 OS=Mus musculus OX=10090 GN=Dnajc28 PE=1 SV=2	6.036	4.15584	89.9	104	115	107.4	109.6	101.6	94.9	88.6	96.8	92.1
Q8BW10	RNA-binding protein NOB1 OS=Mus musculus OX=10090 GN=Nob1 PE=1 SV=1	6.025	3.97022	88.7	93.4	97	104.5	89.5	100.7	99.6	104.4	106.7	115.5
Q99N91	39S ribosomal protein L34, mitochondrial OS=Mus musculus OX=10090 GN=Mrpl34 PE=1 SV=1	5.991	23.913	121.7	123.9	132.1	101.4	113.4	79.7	78.5	79	75.6	94.7
P63271	Transcription elongation factor SPT4-A OS=Mus musculus OX=10090 GN=Supt4h1a PE=2 SV=1	5.968	13.6752	76.3	92.5	94.8	103.9	85.8	111.6	115.6	108.7	105.5	105.3
Q9JHQ0	Annexin A9 OS=Mus musculus OX=10090 GN=Anxa9 PE=2 SV=2	5.945	11.3043	76.7	92.9	82.3	105.2	83.8	104.5	114.2	128.2	105.2	107
Q3UFS4	G patch domain-containing protein 11 OS=Mus musculus OX=10090 GN=Gpatch11 PE=1 SV=2	5.931	5.72519	98.7	104.7	112.6	103.6	96.7	91.5	88.9	98.1	105.3	100
P04370	Myelin basic protein OS=Mus musculus OX=10090 GN=Mbp PE=1 SV=2	5.91	6.8	77.5	89.1	84.5	94.9	78.5	120.8	122.2	120.5	106.1	106
P70180	Atrial natriuretic peptide receptor 3 OS=Mus musculus OX=10090 GN=Npr3 PE=1 SV=3	5.885	2.79851	118.7	115.6	113.1	125	127.9	77.2	70.8	86.8	80.8	84
Q7TPW1	Nexilin OS=Mus musculus OX=10090 GN=Nexn PE=1 SV=3	5.852	2.9654	86.6	98.9	95.3	104.6	93.7	113.2	105.3	100.7	103.1	98.7
Q8K363	ATP-dependent RNA helicase DDX18 OS=Mus musculus OX=10090 GN=Ddx18 PE=1 SV=1	5.851	2.87879	82.1	94.2	93.3	93.8	96.2	102.4	99.5	110	111.9	116.7
Q9D0D5	General transcription factor IIE subunit 1 OS=Mus musculus OX=10090 GN=Gtf2e1 PE=1 SV=1	5.843	4.54545	85.7	92	90.2	100.4	96.2	108.3	91.7	108.2	111.9	115.3
Q9Z224	Molybdopterin synthase sulfur carrier subunit OS=Mus musculus OX=10090 GN=Mocs2 PE=1 SV=1	5.835	18.1818	103.9	99.6	106.7	105.7	100.1	103.2	87.8	95.9	98.4	98.7
Q5HZI1	Microtubule-associated tumor suppressor 1 homolog OS=Mus musculus OX=10090 GN=Mtus1 PE=1 SV=2	5.805	2.14876	99.8	82	101.2	87	103.1	99.9	81.5	127.2	90	128.4
Q8R3N6	THO complex subunit 1 OS=Mus musculus OX=10090 GN=Thoc1 PE=1 SV=1	5.799	2.28311	94.5	87.4	92.9	82.9	99.6	108.5	106.5	104	108	115.6
A2AJ15	Endoplasmic reticulum mannosyl-oligosaccharide 1,2-alpha-mannosidase OS=Mus musculus OX=10090 GN=Man1b1 PE=1 SV=1	5.79	3.03951	103.6	88.7	84.9	89.6	101.6	92.7	97.2	109.7	117.7	114.3
Q8VHK1	Caskin-2 OS=Mus musculus OX=10090 GN=Caskin2 PE=1 SV=3	5.784	1.91507	86.2	99.9	108.1	101.3	88.5	112.9	96.3	105.9	91.8	109.1
Q9D1H7	Golgi to ER traffic protein 4 homolog OS=Mus musculus OX=10090 GN=Get4 PE=1 SV=2	5.774	5.50459	93.5	78.7	86.2	89.4	95.8	91.6	99.6	107.7	136.6	120.9
Q91V16	Electron transfer flavoprotein regulatory factor 1 OS=Mus musculus OX=10090 GN=Etfrf1 PE=1 SV=1	5.768	23.2558	125.8	117.2	119.8	115.1	123.3	84.5	89.1	71.2	80.1	73.9
Q9DB91	Mediator of RNA polymerase II transcription subunit 29 OS=Mus musculus OX=10090 GN=Med29 PE=2 SV=1	5.762	7.53769	81.8	89.6	86.5	91.4	121.5	112.4	104.6	100.6	108.9	102.8
Q9QXA6	b(0,+)-type amino acid transporter 1 OS=Mus musculus OX=10090 GN=Slc7a9 PE=1 SV=1	5.733	4.51745	95.3	88.9	86.4	83.3	146	84.6	118.8	87.3	113.7	95.6
Q9R1S0	B9 domain-containing protein 1 OS=Mus musculus OX=10090 GN=B9d1 PE=1 SV=1	5.723	7.84314	80	85.4	71.8	90.4	82.4	117	92.8	137.1	106.4	136.7
E9Q6J5	Biorientation of chromosomes in cell division protein 1-like 1 OS=Mus musculus OX=10090 GN=Bod1l PE=1 SV=1	5.704	0.824538	81.2	79.7	84.2	94.5	84.9	104.8	107.7	116.5	125	121.6
Q9WTR5	Cadherin-13 OS=Mus musculus OX=10090 GN=Cdh13 PE=1 SV=2	5.698	4.20168	110.7	101.6	92.8	110.1	95.7	126.8	94.2	84	92.9	91.3
Q61738	Integrin alpha-7 OS=Mus musculus OX=10090 GN=Itga7 PE=1 SV=3	5.684	1.52672	99	82.5	86.8	87.6	105.8	97.7	101.3	109.2	116.5	113.7
Q80WQ6	Inactive rhomboid protein 2 OS=Mus musculus OX=10090 GN=Rhbdf2 PE=1 SV=1	5.66	1.9347	80.5	87.9	90.9	92.4	87.2	113.3	102.9	109.9	112.6	122.4
Q8C3R1	BRCA1-associated ATM activator 1 OS=Mus musculus OX=10090 GN=Brat1 PE=1 SV=1	5.653	3.89294	68.7	66	61.3	110.5	78.5	122.5	78.7	151.1	127.3	135.3
Q8VCG3	WD repeat-containing protein 74 OS=Mus musculus OX=10090 GN=Wdr74 PE=2 SV=1	5.649	7.29167	77.1	86.8	86.5	92.9	89.2	117.7	106.9	111.8	109.1	122.1
Q9JHH9	Coatomer subunit zeta-2 OS=Mus musculus OX=10090 GN=Copz2 PE=1 SV=1	5.645	8.78049	97.9	100.4	93.6	107.5	104.1	92.4	102.4	96.6	103.7	101.4
Q8R0F3	Formylglycine-generating enzyme OS=Mus musculus OX=10090 GN=Sumf1 PE=1 SV=2	5.623	7.52688	96.1	85.6	108.1	112.9	99.7	98	83.7	102.5	98.8	114.6
Q9D720	Non-structural maintenance of chromosomes element 1 homolog OS=Mus musculus OX=10090 GN=Nsmce1 PE=1 SV=1	5.606	6.01504	73.4	78.4	83.9	96.4	74.2	148.7	117.1	116.8	94.4	116.7
Q91XL3	UDP-glucuronic acid decarboxylase 1 OS=Mus musculus OX=10090 GN=Uxs1 PE=1 SV=1	5.6	4.52381	106.7	115.2	115.6	113.5	86.3	98.5	81.2	97.7	93.6	91.8
Q8BL99	Protein dopey-1 OS=Mus musculus OX=10090 GN=Dop1a PE=1 SV=2	5.592	1.33389	88.3	80	89.9	90.1	103.2	101.6	100.7	95.1	146.1	105
O08586	Phosphatidylinositol 3,4,5-trisphosphate 3-phosphatase and dual-specificity protein phosphatase PTEN OS=Mus musculus OX=10090 GN=Pten PE=1 SV=1	5.587	3.72208	99.6	103.1	98.5	96.1	106.9	90	89.8	108.3	105.1	102.6
P97386	DNA ligase 3 OS=Mus musculus OX=10090 GN=Lig3 PE=1 SV=2	5.562	1.7734	102.3	93.8	99.8	100.8	104.5	99	86.9	100.6	110.1	102.2
P25916	Polycomb complex protein BMI-1 OS=Mus musculus OX=10090 GN=Bmi1 PE=1 SV=1	5.559	5.8642	92.2	110.7	102.3	98.9	107.4	97.4	104.6	97.5	95.4	93.6
Q9CR56	NF-kappa-B inhibitor-interacting Ras-like protein 2 OS=Mus musculus OX=10090 GN=Nkiras2 PE=1 SV=1	5.54	9.94764	74.5	106.6	102.8	96.9	83.9	112.6	102.3	112.6	99.9	107.9
P27808	Alpha-1,3-mannosyl-glycoprotein 2-beta-N-acetylglucosaminyltransferase OS=Mus musculus OX=10090 GN=Mgat1 PE=1 SV=1	5.538	3.57942	96.2	95.3	90.3	94.4	101.3	90.5	90.8	112.6	117	111.7
Q9Z1R3	Apolipoprotein M OS=Mus musculus OX=10090 GN=Apom PE=1 SV=1	5.519	7.89474	90.4	120.5	102.3	110.2	108.3	118.7	117.1	71.8	62	98.8
Q8BSA9	tRNA wybutosine-synthesizing protein 3 homolog OS=Mus musculus OX=10090 GN=Tyw3 PE=1 SV=1	5.483	5.83658	96.3	98.5	103.7	97	101.2	109.5	99.4	94	98.8	101.5
Q6PIJ4	Nuclear factor related to kappa-B-binding protein OS=Mus musculus OX=10090 GN=Nfrkb PE=1 SV=1	5.472	1.46605	102.3	92	107.3	97.8	91	106.9	93.9	97.4	102.3	109.1
Q61083	Mitogen-activated protein kinase kinase kinase 2 OS=Mus musculus OX=10090 GN=Map3k2 PE=1 SV=2	5.46	5.16963	83.9	89	88.6	93.5	87.6	108.9	93.4	122.7	116.5	115.9
Q8K385	Ferric-chelate reductase 1 OS=Mus musculus OX=10090 GN=FRRS1 PE=1 SV=1	5.441	2.53378	73.9	78.4	71.1	106.6	81.3	133.9	88.8	131	107.8	127.4
Q9WU38	Amiloride-sensitive sodium channel subunit beta OS=Mus musculus OX=10090 GN=Scnn1b PE=1 SV=1	5.432	4.38871	99.4	104.9	102.4	88.8	109.1	81.4	85	105.4	113.1	110.6
O35188	Fractalkine OS=Mus musculus OX=10090 GN=Cx3cl1 PE=1 SV=3	5.425	3.79747	91	85.4	80.4	90	83.7	112.8	103.1	106.5	121.7	125.3
Q91YU6	Leucine zipper putative tumor suppressor 2 OS=Mus musculus OX=10090 GN=Lzts2 PE=1 SV=3	5.419	2.23547	79.1	95.3	89.3	88.1	87.2	106.5	112.2	110	112.4	119.9
Q9CQE5	Regulator of G-protein signaling 10 OS=Mus musculus OX=10090 GN=Rgs10 PE=1 SV=1	5.417	9.94475	94.6	106.1	102.8	104.5	101.2	119.1	89.6	96.3	96.3	89.5
Q9DC48	Pre-mRNA-processing factor 17 OS=Mus musculus OX=10090 GN=Cdc40 PE=2 SV=1	5.417	2.9361	78.8	87	88	87.8	93.9	113.2	116.5	110.6	111.9	112.3
Q9D8T2	Gasdermin-D OS=Mus musculus OX=10090 GN=Gsdmd PE=1 SV=1	5.359	4.10678	68.3	73.7	69.3	68	73.6	110.3	104.8	136.9	139.2	155.8
Q8K2Z2	Pre-mRNA-processing factor 39 OS=Mus musculus OX=10090 GN=Prpf39 PE=1 SV=3	5.357	2.70677	96.4	104.2	97.8	93.3	98.4	100.4	97.7	101.8	101.5	108.5
Q3UHI4	Protein TMED8 OS=Mus musculus OX=10090 GN=Tmed8 PE=2 SV=1	5.331	5.21472	91.5	96.2	89.9	106.5	104.5	94.5	95.4	107.2	100.1	114.3
Q8BGZ4	Cell division cycle protein 23 homolog OS=Mus musculus OX=10090 GN=Cdc23 PE=1 SV=2	5.287	3.01508	97.6	76.8	96.8	76.2	95.1	80.8	100.5	120.5	135.2	120.5
Q9WVS6	E3 ubiquitin-protein ligase parkin OS=Mus musculus OX=10090 GN=Prkn PE=1 SV=1	5.286	3.66379	97.7	91.3	92.1	100.9	102.1	103.2	96.1	105.7	104.8	106
Q91V88	Nephronectin OS=Mus musculus OX=10090 GN=Npnt PE=1 SV=1	5.264	2.85205	108.3	125.6	106.5	105.3	107.7	107.9	84.3	83.1	88.5	82.8
Q8BRV5	Uncharacterized protein KIAA1671 OS=Mus musculus OX=10090 GN=Kiaa1671 PE=2 SV=1	5.223	5.84416	124.2	130.8	140.2	132.3	96.6	95.7	74.7	69.6	71	64.9
Q7TPE5	Probable RNA polymerase II nuclear localization protein SLC7A6OS OS=Mus musculus OX=10090 GN=Slc7a6os PE=1 SV=1	5.222	6.20915	107.6	91.1	102.2	112.5	92	100.6	98.6	93.4	101.7	100.2
Q8R5A3	Amyloid beta A4 precursor protein-binding family B member 1-interacting protein OS=Mus musculus OX=10090 GN=Apbb1ip PE=1 SV=2	5.206	2.98507	111.9	91.9	99.9	106.8	81.6	103.3	100	102.7	98.3	103.6
Q3U6N9	UPF0488 protein C8orf33 homolog OS=Mus musculus OX=10090 PE=2 SV=1	5.192	7.65766	89.1	78.9	84.1	96.1	71.5	142.5	116.5	97.4	111.4	112.4
Q9QXM0	Monoacylglycerol lipase ABHD2 OS=Mus musculus OX=10090 GN=Abhd2 PE=1 SV=1	5.168	4.47059	120.9	91.1	121	105.7	110.1	64.5	59.9	113	113.6	100.2
Q8R2N1	Aquaporin-3 OS=Mus musculus OX=10090 GN=Aqp3 PE=1 SV=1	5.164	5.13699	132.6	98.9	129.3	79.5	150.3	73.4	74.6	83.4	93.1	84.9
Q9D0L1	Zinc finger BED domain-containing protein 3 OS=Mus musculus OX=10090 GN=Zbed3 PE=1 SV=1	5.131	7.89474	101.4	85.4	88.8	94.3	89	110.1	84.4	113.2	118	115.4
Q7TMI3	E3 ubiquitin-protein ligase UHRF2 OS=Mus musculus OX=10090 GN=Uhrf2 PE=1 SV=1	5.124	3.11333	80.4	100.9	95.4	91	91.8	114.3	110	99.6	110.1	106.5
P39039	Mannose-binding protein A OS=Mus musculus OX=10090 GN=Mbl1 PE=1 SV=1	5.1	6.27615	65.5	84.6	56.5	79.8	81.6	184.4	150.2	92.1	91.7	113.7
Q8R3E3	WD repeat domain phosphoinositide-interacting protein 1 OS=Mus musculus OX=10090 GN=Wipi1 PE=1 SV=1	5.096	3.81166	94.9	91.9	92.7	91.2	95.7	114.5	104.5	100.9	109.8	103.9
Q9CQ79	Thioredoxin domain-containing protein 9 OS=Mus musculus OX=10090 GN=Txndc9 PE=1 SV=1	5.09	7.07965	108.1	101.8	95.8	105.6	99.1	93.4	88.6	100.3	103.2	104.1
Q8CHU3	Epsin-2 OS=Mus musculus OX=10090 GN=Epn2 PE=1 SV=1	5.081	2.85714	75.2	91.8	82.8	88.5	91.4	112.8	129.8	115.7	102.5	109.6
A2AGH6	Mediator of RNA polymerase II transcription subunit 12 OS=Mus musculus OX=10090 GN=Med12 PE=1 SV=1	5.001	0.730594	97.1	124.3	101.5	130.2	97.1	99.3	101.8	79.4	76.1	93.3
P99024	Tubulin beta-5 chain OS=Mus musculus OX=10090 GN=Tubb5 PE=1 SV=1	489.967	65.5405	82.2	111.3	85.6	89.1	96	101.7	105.3	109	112.7	107.2
B5X0G2	Major urinary protein 17 OS=Mus musculus OX=10090 GN=Mup17 PE=2 SV=2	257.328	81.1111	157.5	41.3	36.2	109.6	119.3	51.8	109.6	61	175.3	138.5
Q00897	Alpha-1-antitrypsin 1-4 OS=Mus musculus OX=10090 GN=Serpina1d PE=1 SV=1	252.466	50.3632	82.1	113.7	91.2	113.6	95.1	114	108.1	89.3	77.9	115
P63087	Serine/threonine-protein phosphatase PP1-gamma catalytic subunit OS=Mus musculus OX=10090 GN=Ppp1cc PE=1 SV=1	211.023	76.4706	92.6	90.2	88.3	90.1	95.4	101.5	113.7	112.3	110.3	105.5
P62137	Serine/threonine-protein phosphatase PP1-alpha catalytic subunit OS=Mus musculus OX=10090 GN=Ppp1ca PE=1 SV=1	202.103	66.9697	97.9	93.2	101.6	97.8	96	102.2	102.7	103	106.4	99.2
Q8BSL7	ADP-ribosylation factor 2 OS=Mus musculus OX=10090 GN=Arf2 PE=1 SV=2	191.415	83.4254	84.7	89.1	88.1	87.2	87.6	104.9	96.4	125.3	120.6	116.1
P62631	Elongation factor 1-alpha 2 OS=Mus musculus OX=10090 GN=Eef1a2 PE=1 SV=1	184.582	31.5335	69.5	70.4	84.7	102.2	55.5	113.5	60.1	193.9	89.4	160.9
Q62159	Rho-related GTP-binding protein RhoC OS=Mus musculus OX=10090 GN=Rhoc PE=1 SV=2	134.356	62.1762	82.9	67.1	63.7	68.4	84.4	104.8	118.4	136.2	142.1	132.1
P46638	Ras-related protein Rab-11B OS=Mus musculus OX=10090 GN=Rab11b PE=1 SV=3	134.178	57.3394	114.1	100	109.5	81.6	111	88.9	118.1	86.7	98.7	91.3
Q8BGG9	Acyl-coenzyme A amino acid N-acyltransferase 2 OS=Mus musculus OX=10090 GN=Acnat2 PE=1 SV=1	115.906	35.4762	95.8	80.5	110.5	85.8	99.6	101.2	106.9	99.2	113.9	106.5
Q80W21	Glutathione S-transferase Mu 7 OS=Mus musculus OX=10090 GN=Gstm7 PE=1 SV=1	115.42	45.8716	83.4	118.5	121.3	119.8	102.3	98.6	87.1	82.7	80.6	105.7
Q9WV02	RNA-binding motif protein, X chromosome OS=Mus musculus OX=10090 GN=Rbmx PE=1 SV=1	105.445	41.1765	103.8	113.4	109.4	104.8	84.2	100	93.4	92.8	100	98.3
P47955	60S acidic ribosomal protein P1 OS=Mus musculus OX=10090 GN=Rplp1 PE=1 SV=1	104.129	56.1404	103	101.9	94.3	99.6	97.8	90.2	94.4	105.2	110.3	103.2
P43274	Histone H1.4 OS=Mus musculus OX=10090 GN=H1-4 PE=1 SV=2	96.512	40.1826	85.6	129	93	96	71.7	143.6	78.2	107	82.4	113.4
P27661	Histone H2AX OS=Mus musculus OX=10090 GN=H2ax PE=1 SV=2	96.058	46.8531	61.7	80.4	74.3	135.4	103.7	139.2	109.5	110.9	98.4	86.6
Q9CQW2	ADP-ribosylation factor-like protein 8B OS=Mus musculus OX=10090 GN=Arl8b PE=1 SV=1	94.349	48.3871	100.8	94.9	100.9	86.7	110.2	92.6	105.2	104.7	104.1	99.9
Q61411	GTPase HRas OS=Mus musculus OX=10090 GN=Hras PE=1 SV=2	91.046	58.7302	68.8	82.7	69.1	74.3	126.3	131.2	154.6	87.5	106.6	98.8
P10854	Histone H2B type 1-M OS=Mus musculus OX=10090 GN=H2bc14 PE=1 SV=2	90.993	63.4921	55.4	75.8	67.2	101.3	89.4	159.6	122.5	128.1	103.2	97.6
P08905	Lysozyme C-2 OS=Mus musculus OX=10090 GN=Lyz2 PE=1 SV=2	84.71	48.6486	109.4	83.6	97.4	110.5	105.8	120.8	112.5	99.7	83.3	77
P35279	Ras-related protein Rab-6A OS=Mus musculus OX=10090 GN=Rab6a PE=1 SV=4	70.599	58.6538	93.4	93	92.5	87	109.4	89.9	100.2	112.7	111.7	110.1
P61021	Ras-related protein Rab-5B OS=Mus musculus OX=10090 GN=Rab5b PE=1 SV=1	68.923	33.9535	100.3	95.8	103	96.9	102.8	99	98.5	101.4	102.4	99.8
O35945	Aldehyde dehydrogenase, cytosolic 1 OS=Mus musculus OX=10090 GN=Aldh1a7 PE=1 SV=1	67.767	17.9641	85.6	87.8	137	76	93.8	107	112.4	85.6	88	126.8
P61294	Ras-related protein Rab-6B OS=Mus musculus OX=10090 GN=Rab6b PE=1 SV=1	65.722	54.3269	100.3	107.9	113.8	97.7	111.2	91.3	85.9	94.9	92.8	104.2
P62627	Dynein light chain roadblock-type 1 OS=Mus musculus OX=10090 GN=Dynlrb1 PE=1 SV=3	63.306	61.4583	89.5	106.8	96.3	96.9	104	100.2	116.7	94.2	96.9	98.6
P61971	Nuclear transport factor 2 OS=Mus musculus OX=10090 GN=Nutf2 PE=1 SV=1	61.711	51.9685	98.6	108.6	113.2	96.9	104.3	96.2	109.8	86	95.1	91.2
Q9QZM0	Ubiquilin-2 OS=Mus musculus OX=10090 GN=Ubqln2 PE=1 SV=2	56.314	10.6583	91.2	87.8	92.7	107.6	91.3	108.9	101.5	106.1	103.5	109.3
P26149	3 beta-hydroxysteroid dehydrogenase/Delta 5-->4-isomerase type 2 OS=Mus musculus OX=10090 GN=Hsd3b2 PE=1 SV=4	54.965	23.5925	141.7	86.2	140.4	106.7	157.9	59.8	74.1	76.1	84.2	72.9
P40240	CD9 antigen OS=Mus musculus OX=10090 GN=Cd9 PE=1 SV=2	54.19	15.9292	102.3	75.6	80.8	67.7	94.8	91.1	111	138.8	125.2	112.7
Q8CI04	Conserved oligomeric Golgi complex subunit 3 OS=Mus musculus OX=10090 GN=Cog3 PE=1 SV=3	53.838	10.8537	101.4	83.2	88.9	83.4	105	91.2	95.9	114.5	136.4	100.2
Q9R1T4	Septin-6 OS=Mus musculus OX=10090 GN=Septin6 PE=1 SV=4	53.535	26.4977	108.3	109.5	110.6	98.7	98.4	93.4	94.6	87.5	98.5	100.6
P19258	Protein Mpv17 OS=Mus musculus OX=10090 GN=Mpv17 PE=1 SV=1	51.503	29.5455	103.7	91.6	118	88.3	121	77.1	85.1	100.9	110.5	103.8
Q9JHJ3	Glycosylated lysosomal membrane protein OS=Mus musculus OX=10090 GN=Glmp PE=1 SV=1	49.141	19.5545	72.4	78.5	62.9	79.8	111.9	97.9	133	105.6	135.5	122.5
Q9WVA2	Mitochondrial import inner membrane translocase subunit Tim8 A OS=Mus musculus OX=10090 GN=Timm8a1 PE=1 SV=1	48.456	32.9897	97.4	122.5	109.4	114.9	97.3	103.7	88.3	90.8	88.5	87.2
Q9WTQ8	Mitochondrial import inner membrane translocase subunit Tim23 OS=Mus musculus OX=10090 GN=Timm23 PE=1 SV=1	46.935	32.5359	119.6	96.4	112.5	100.2	113.8	83.3	86.7	92.9	97.5	97
Q6PFR5	Transformer-2 protein homolog alpha OS=Mus musculus OX=10090 GN=Tra2a PE=1 SV=1	46.716	19.2171	91.5	95.1	111.5	99	102.9	101.1	101	102.3	98.8	96.9
Q9CQ21	Malignant T-cell-amplified sequence 2 OS=Mus musculus OX=10090 GN=Mcts2 PE=1 SV=1	46.577	51.9337	83.6	100.5	109.7	97.8	96.7	101.8	109.8	98.2	94.9	107
Q9D0Y8	39S ribosomal protein L52, mitochondrial OS=Mus musculus OX=10090 GN=Mrpl52 PE=1 SV=1	45.901	47.9339	123	116.6	117	153.3	101.9	84.5	80.9	73.5	70	79.3
Q9Z255	Ubiquitin-conjugating enzyme E2 A OS=Mus musculus OX=10090 GN=Ube2a PE=1 SV=1	45.253	69.7368	83.4	89.7	86.6	93.2	84.7	109.6	102.4	108.4	112.7	129.3
Q8R3G9	Tetraspanin-8 OS=Mus musculus OX=10090 GN=Tspan8 PE=1 SV=1	44.533	22.9787	115.5	124.2	117.3	73.2	122.4	78.2	105.3	87.9	102.1	73.9
Q9JL62	Glycolipid transfer protein OS=Mus musculus OX=10090 GN=Gltp PE=1 SV=3	43.902	29.6651	124.1	102.6	105.2	89.4	114.6	76.3	90	92.7	108	97
Q9CQ91	NADH dehydrogenase [ubiquinone] 1 alpha subcomplex subunit 3 OS=Mus musculus OX=10090 GN=Ndufa3 PE=1 SV=1	43.774	50	136	130.6	115.1	102.5	115.8	77.9	87.1	80.5	80.9	73.5
Q8C3Q9	Caspase-9 OS=Mus musculus OX=10090 GN=Casp9 PE=1 SV=1	43.087	11.4537	92.4	89.3	94.2	101.9	103.7	104.2	89.1	105.9	105.9	113.3
P61079	Ubiquitin-conjugating enzyme E2 D3 OS=Mus musculus OX=10090 GN=Ube2d3 PE=1 SV=1	43.027	40.8163	96.6	86.5	97.5	93.5	102.8	91.3	107.4	102	117.6	104.9
Q80WC7	Arf-GAP domain and FG repeat-containing protein 2 OS=Mus musculus OX=10090 GN=Agfg2 PE=1 SV=1	42.889	11.4823	94	89.3	105.8	114.1	101.4	101.8	107.4	100.4	95.8	90.2
Q9D924	Iron-sulfur cluster assembly 1 homolog, mitochondrial OS=Mus musculus OX=10090 GN=Isca1 PE=2 SV=1	41.384	34.8837	103.3	107.8	115	115.4	106	90.5	93.7	89.5	88.3	90.5
Q9CR95	Adaptin ear-binding coat-associated protein 1 OS=Mus musculus OX=10090 GN=Necap1 PE=1 SV=2	40.679	14.5455	95.7	100.6	88.5	105.9	95	108.2	97.2	100.1	102.5	106.3
O88447	Kinesin light chain 1 OS=Mus musculus OX=10090 GN=Klc1 PE=1 SV=3	39.702	15.8965	82.3	91.6	84.6	86.2	87.6	116.2	118	112.7	109.9	111.1
Q91YT7	YTH domain-containing family protein 2 OS=Mus musculus OX=10090 GN=Ythdf2 PE=1 SV=1	38.75	12.2625	94.7	96	97.1	98.6	98.9	98.7	102.9	100.3	107.3	105.4
Q8CCK0	Core histone macro-H2A.2 OS=Mus musculus OX=10090 GN=Macroh2a2 PE=1 SV=3	38.683	13.9785	82	98	86.7	96.1	92.9	115.3	108.7	109.9	105.9	104.6
P03911	NADH-ubiquinone oxidoreductase chain 4 OS=Mus musculus OX=10090 GN=Mtnd4 PE=1 SV=1	38.339	9.58606	129.6	98	114.4	73.1	137.5	67.8	86.7	87.8	115.3	89.9
G3X939	Sodium/hydrogen exchanger 3 OS=Mus musculus OX=10090 GN=Slc9a3 PE=1 SV=1	38.079	6.75513	72.9	70.6	83.8	71.4	131.2	90.4	120	117.9	133.9	107.8
Q9JI11	Serine/threonine-protein kinase 4 OS=Mus musculus OX=10090 GN=Stk4 PE=1 SV=1	37.981	18.0698	101.3	95.5	105.6	95.6	100.6	95	99.2	100	102.1	105.1
Q99J27	Acetyl-coenzyme A transporter 1 OS=Mus musculus OX=10090 GN=Slc33a1 PE=1 SV=1	37.981	12.1818	145.5	89.8	133.7	82.2	133.6	57.1	72.9	86.9	105.7	92.6
Q5SSK3	Transcription elongation factor, mitochondrial OS=Mus musculus OX=10090 GN=Tefm PE=1 SV=1	37.936	15.3846	110.8	111.3	122.4	93.3	127.1	74.4	84.1	85.9	104.3	86.5
Q9WVP1	AP-1 complex subunit mu-2 OS=Mus musculus OX=10090 GN=Ap1m2 PE=1 SV=3	37.824	14.8936	88.1	93.1	95.4	77.6	112.9	81.6	103.8	124	119.3	104.1
P97470	Serine/threonine-protein phosphatase 4 catalytic subunit OS=Mus musculus OX=10090 GN=Ppp4c PE=1 SV=2	37.394	16.9381	91.1	94	95.9	89.1	95.5	99.3	110.5	106.7	99.6	118.4
Q9QXN0	Protein Shroom3 OS=Mus musculus OX=10090 GN=Shroom3 PE=1 SV=2	37.332	3.27291	83.1	94.9	91.7	112.1	82.8	109.5	125.2	97.7	98.2	104.8
Q68FE6	Rho family-interacting cell polarization regulator 1 OS=Mus musculus OX=10090 GN=Ripor1 PE=1 SV=2	37.076	4.74244	88.8	91	101.2	93.2	97.6	99.2	103.6	110.5	112.2	102.7
Q8K0E3	Sodium/myo-inositol cotransporter 2 OS=Mus musculus OX=10090 GN=Slc5a11 PE=1 SV=1	36.782	6.24071	124.5	93.6	131.7	84.8	141.2	74.4	90.3	88.5	93	78
P51807	Dynein light chain Tctex-type 1 OS=Mus musculus OX=10090 GN=Dynlt1 PE=1 SV=1	36.631	41.5929	96.2	83.2	95.9	80.9	95.7	95.9	107.3	107.1	121.3	116.5
P98083	SHC-transforming protein 1 OS=Mus musculus OX=10090 GN=Shc1 PE=1 SV=3	36.477	10.0173	79.8	85.2	85.4	90.1	79.4	110.9	106.6	113.1	127.4	122.2
P70175	Disks large homolog 3 OS=Mus musculus OX=10090 GN=Dlg3 PE=1 SV=1	36.354	7.06714	52.7	67.2	61	67.9	145.6	134.5	123.5	114.2	129.8	103.6
Q6ZQH8	Nucleoporin NUP188 OS=Mus musculus OX=10090 GN=Nup188 PE=1 SV=2	36.084	3.35418	97.8	76.5	88.8	78.9	106.6	93.1	98.6	117.1	131	111.6
Q5FW60	Major urinary protein 20 OS=Mus musculus OX=10090 GN=Mup20 PE=1 SV=1	36.022	40.884	208.7	71.9	88.7	115.6	153.6	50.7	82.5	50.2	79.4	98.8
O89090	Transcription factor Sp1 OS=Mus musculus OX=10090 GN=Sp1 PE=1 SV=2	35.824	2.80612	74.7	85.7	83.6	99.9	84.1	121.6	119.4	111.9	104.5	114.6
P09036	Serine protease inhibitor Kazal-type 1 OS=Mus musculus OX=10090 GN=Spink1 PE=1 SV=1	35.595	40	148.1	134.2	131.3	124.8	106.7	69.3	63.9	74.2	70	77.5
Q9D1L9	Ragulator complex protein LAMTOR5 OS=Mus musculus OX=10090 GN=Lamtor5 PE=1 SV=1	35.578	59.3407	99.8	94.1	101.1	100.8	104.8	103.1	105.8	95.6	97.8	97.2
Q64314	Hematopoietic progenitor cell antigen CD34 OS=Mus musculus OX=10090 GN=Cd34 PE=1 SV=1	35.125	10.2094	96.5	111.7	110.6	106.5	93.5	109.2	114.5	95.2	81.8	80.6
Q3TLS3	GDP-D-glucose phosphorylase 1 OS=Mus musculus OX=10090 GN=Gdpgp1 PE=1 SV=2	35.089	14.7668	107	91.4	100.3	93.1	97.6	91.9	94.5	108.3	98.8	117.1
Q9D0R8	Protein LSM12 homolog OS=Mus musculus OX=10090 GN=Lsm12 PE=1 SV=1	35.005	23.5897	100.8	104.7	97.9	106.3	96	99.7	98	97.1	98.4	101.1
Q9Z2L7	Cytokine receptor-like factor 3 OS=Mus musculus OX=10090 GN=Crlf3 PE=1 SV=1	34.844	12.6697	93	101.7	95	93.4	100.2	97.9	108.5	98.3	105.4	106.7
Q80TP3	E3 ubiquitin-protein ligase UBR5 OS=Mus musculus OX=10090 GN=Ubr5 PE=1 SV=2	34.646	1.89828	74.9	81.4	80.1	84.9	84.2	120.3	113.5	113.9	119.1	127.8
Q80UY2	E3 ubiquitin-protein ligase KCMF1 OS=Mus musculus OX=10090 GN=Kcmf1 PE=1 SV=1	34.499	10.4987	95.4	87.3	92.7	96.2	84.4	100.6	103	105.4	123.8	111.2
P59113	Fermitin family homolog 1 OS=Mus musculus OX=10090 GN=Fermt1 PE=1 SV=4	34.491	7.38552	77.5	82	84.7	94.7	89.4	115.7	96.2	122.3	102.2	135.4
P63024	Vesicle-associated membrane protein 3 OS=Mus musculus OX=10090 GN=Vamp3 PE=1 SV=1	34.49	47.5728	96.2	80.8	90.7	80.6	94.7	96.4	96.4	123.4	125.8	115
Q9D0M5	Dynein light chain 2, cytoplasmic OS=Mus musculus OX=10090 GN=Dynll2 PE=1 SV=1	34.375	40.4494	72.2	143.6	88.9	120.6	104	102	107.6	93.9	83	84.2
O70566	Protein diaphanous homolog 2 OS=Mus musculus OX=10090 GN=Diaph2 PE=1 SV=2	34.371	5.91985	91.2	92.2	85.9	88.6	98.5	99.9	99.2	120.1	113.8	110.5
Q9Z1P8	Angiopoietin-related protein 4 OS=Mus musculus OX=10090 GN=Angptl4 PE=1 SV=1	34.311	15.8537	59	61.6	81.9	75.1	63.8	138	163.1	101.4	126.2	129.9
Q80TZ3	Putative tyrosine-protein phosphatase auxilin OS=Mus musculus OX=10090 GN=Dnajc6 PE=1 SV=2	33.108	5.86354	114.8	97.8	105.1	110.4	109.7	96.3	91.3	89.7	91.7	93.2
P33622	Apolipoprotein C-III OS=Mus musculus OX=10090 GN=Apoc3 PE=1 SV=2	32.971	50.5051	95.3	134.8	96.4	128.1	120	96.1	89.2	73.8	55.3	111
Q9D7I5	Phospholysine phosphohistidine inorganic pyrophosphate phosphatase OS=Mus musculus OX=10090 GN=Lhpp PE=1 SV=1	32.169	22.5926	77.2	111.3	88.4	103.2	89.1	107.3	99.5	118.3	97.7	108.2
A2ARP1	Inositol hexakisphosphate and diphosphoinositol-pentakisphosphate kinase 1 OS=Mus musculus OX=10090 GN=Ppip5k1 PE=1 SV=1	31.741	5.57103	75.5	78.2	82.1	88.3	81.2	112.1	103.2	129.9	131	118.5
Q5SUC9	Protein SCO1 homolog, mitochondrial OS=Mus musculus OX=10090 GN=Sco1 PE=1 SV=1	31.57	14.4366	106.9	111.2	114.4	99.1	120.2	85.7	97.2	86.8	89	89.5
Q9JK23	Proteasome assembly chaperone 1 OS=Mus musculus OX=10090 GN=Psmg1 PE=1 SV=1	31.42	19.7232	101.6	106.2	94.9	90.5	98.8	88.3	100.6	107.3	109.6	102.2
P26883	Peptidyl-prolyl cis-trans isomerase FKBP1A OS=Mus musculus OX=10090 GN=Fkbp1a PE=1 SV=2	31.33	29.6296	97.1	106	102.5	95.7	91.1	104.1	112.7	94.7	100.2	95.8
Q9DAA6	Exosome complex component CSL4 OS=Mus musculus OX=10090 GN=Exosc1 PE=1 SV=1	31.182	40	94.6	95.2	93.4	98.4	83.8	102.2	103.1	111.9	114.4	103
P63139	Nuclear transcription factor Y subunit beta OS=Mus musculus OX=10090 GN=Nfyb PE=1 SV=1	30.857	25.6039	102.1	92.3	99.5	97.7	92.1	108.5	109.2	101.9	103.1	93.6
P02802	Metallothionein-1 OS=Mus musculus OX=10090 GN=Mt1 PE=1 SV=1	30.279	34.4262	21.4	23.4	31.6	27.1	29.4	226.7	280.1	113.4	121.5	125.5
Q5M8N0	CB1 cannabinoid receptor-interacting protein 1 OS=Mus musculus OX=10090 GN=Cnrip1 PE=1 SV=1	30.265	32.3171	106	85.4	69.2	123.8	79.8	131.2	89.3	119.7	84.3	111.4
P21958	Antigen peptide transporter 1 OS=Mus musculus OX=10090 GN=Tap1 PE=1 SV=3	30.248	6.76796	51.8	74.8	59.8	70.6	63.1	95.1	101.5	152.2	171.3	159.8
Q6NZF1	Zinc finger CCCH domain-containing protein 11A OS=Mus musculus OX=10090 GN=Zc3h11a PE=1 SV=1	30.222	5.93434	83.8	95.8	95.4	97	85.8	118.1	115.3	101.1	104.3	103.5
Q921L7	MTRF1L release factor glutamine methyltransferase OS=Mus musculus OX=10090 GN=Hemk1 PE=2 SV=2	30.133	22.3529	104.8	105.5	104.7	120.1	103.3	92.2	86.5	95.7	94.3	92.8
Q9D8W7	OCIA domain-containing protein 2 OS=Mus musculus OX=10090 GN=Ociad2 PE=1 SV=1	29.879	28.5714	94.7	99.4	106.3	105.8	120.7	88.4	85.1	105.7	91.1	102.8
Q8BR90	UPF0600 protein C5orf51 homolog OS=Mus musculus OX=10090 PE=1 SV=1	29.35	7.82313	103.6	98.8	98.9	88.6	108.9	88.7	99.5	108.2	108.3	96.6
Q9JIZ0	Probable N-acetyltransferase CML1 OS=Mus musculus OX=10090 GN=Cml1 PE=1 SV=1	29.091	33.7838	128.6	100.4	140	90.8	134	67.8	78.3	82	93.7	84.4
D3YYM4	WD repeat-containing protein 72 OS=Mus musculus OX=10090 GN=Wdr72 PE=1 SV=1	29.036	4.21903	94.5	81.4	91.1	89.1	110.3	96.2	96.1	114.5	117.3	109.5
Q8BMB3	Eukaryotic translation initiation factor 4E type 2 OS=Mus musculus OX=10090 GN=Eif4e2 PE=1 SV=1	28.915	16.7347	100.3	100.6	103.6	96.5	104.8	94	98.1	99.5	101.4	101.2
P07214	SPARC OS=Mus musculus OX=10090 GN=Sparc PE=1 SV=1	28.847	16.8874	87.8	90.4	97.3	82.4	73.7	115.5	110.9	112.9	107.3	121.7
Q6PIU9	Uncharacterized protein FLJ45252 homolog OS=Mus musculus OX=10090 PE=1 SV=2	28.747	12.1469	75.6	81.1	78.2	103.3	76.1	105.8	93.7	135.7	117.3	133.2
Q9DCD6	Gamma-aminobutyric acid receptor-associated protein OS=Mus musculus OX=10090 GN=Gabarap PE=1 SV=2	28.73	47.0085	121.8	95.7	107.6	94.9	94.4	79.2	80	114	106.1	106.3
Q8K354	Carbonyl reductase [NADPH] 3 OS=Mus musculus OX=10090 GN=Cbr3 PE=1 SV=1	28.56	24.1877	85.5	81.4	90.6	157.3	98.2	103.5	80.9	92	95.2	115.3
Q9Z0V8	Mitochondrial import inner membrane translocase subunit Tim17-A OS=Mus musculus OX=10090 GN=Timm17a PE=1 SV=1	28.435	31.5789	113.2	98.3	102.4	99.6	114.7	90.2	93.4	94.7	100.8	92.7
Q80TQ2	Ubiquitin carboxyl-terminal hydrolase CYLD OS=Mus musculus OX=10090 GN=Cyld PE=1 SV=2	28.3	3.46639	104.2	80.1	106.5	95.9	101.3	102.5	80.4	104.4	113.1	111.7
Q922R1	Phagosome assembly factor 1 OS=Mus musculus OX=10090 GN=Phaf1 PE=1 SV=2	28.162	13.2701	99.8	83.5	94.8	92.1	97.9	100.9	83.7	109.1	136.3	101.8
Q6P3Z3	Peroxynitrite isomerase THAP4 OS=Mus musculus OX=10090 GN=Thap4 PE=1 SV=1	28.103	3.69069	79.7	125.6	93.9	128.6	90.6	125.2	96.6	94.9	80.5	84.4
Q9DD03	Ras-related protein Rab-13 OS=Mus musculus OX=10090 GN=Rab13 PE=1 SV=1	27.895	28.7129	84.5	89.5	87.4	96.2	102.3	102.9	107.7	110.1	109.2	110.2
Q9CY45	EEF1A lysine methyltransferase 1 OS=Mus musculus OX=10090 GN=Eef1akmt1 PE=1 SV=1	27.884	19.1589	111.3	106.5	108.9	112.1	109.2	92.7	86	91.9	91.5	90
Q9DAI2	Intraflagellar transport protein 22 homolog OS=Mus musculus OX=10090 GN=Ift22 PE=1 SV=1	27.585	28.6486	77.6	90.5	87.6	93	97.3	103.8	101.2	107.4	107.1	134.5
Q923K4	tRNA modification GTPase GTPBP3, mitochondrial OS=Mus musculus OX=10090 GN=Gtpbp3 PE=2 SV=1	27.552	10.1626	88.9	87.7	95.2	107.6	95.4	109.9	86.4	92.5	79.8	156.5
Q9WVM3	Anaphase-promoting complex subunit 7 OS=Mus musculus OX=10090 GN=Anapc7 PE=1 SV=3	27.487	8.67257	92.5	89.9	99.3	95	102.2	109	98.9	102.2	113.7	97.2
Q3V0C5	Ubiquitin carboxyl-terminal hydrolase 48 OS=Mus musculus OX=10090 GN=Usp48 PE=1 SV=2	27.485	5.03802	85.8	91.3	94.4	87.8	97.6	100	102.8	109.4	119.6	111.5
Q9D8Y0	EF-hand domain-containing protein D2 OS=Mus musculus OX=10090 GN=Efhd2 PE=1 SV=1	27.357	17.0833	65.2	71.4	62.4	82.9	62.3	143.1	119.9	140.1	118.1	134.7
O08641	SH3 domain-containing YSC84-like protein 1 OS=Mus musculus OX=10090 GN=Sh3yl1 PE=1 SV=1	27.199	15	80.2	91.8	85.5	101.2	96.3	118.8	91.8	109	105.9	119.6
Q9CR29	Coiled-coil domain-containing protein 43 OS=Mus musculus OX=10090 GN=Ccdc43 PE=1 SV=1	27.149	16.2162	92.6	103	102.2	108.3	98.2	100.7	101	97.1	96.6	100.3
Q9DCR2	AP-3 complex subunit sigma-1 OS=Mus musculus OX=10090 GN=Ap3s1 PE=1 SV=2	27.06	19.6891	106	82	97.6	95.5	88.2	94.2	87.6	109	124.2	115.7
Q6P5C5	Single-strand selective monofunctional uracil DNA glycosylase OS=Mus musculus OX=10090 GN=Smug1 PE=1 SV=1	26.748	20.4301	90.5	88.6	93.4	102.6	95.8	98.5	107.5	108.4	105.3	109.4
Q8K1L5	E3 ubiquitin-protein ligase PPP1R11 OS=Mus musculus OX=10090 GN=Ppp1r11 PE=1 SV=1	26.556	19.8473	86.4	102.4	99.5	114.9	89.8	102.1	105.7	99.9	98.9	100.5
Q9D7K5	Distal membrane-arm assembly complex protein 2 OS=Mus musculus OX=10090 GN=Dmac2 PE=1 SV=1	26.463	15.5039	127.4	128.1	128.6	119.2	118.5	81.4	79.6	72.2	76.9	68
S4R1M9	Oxysterol-binding protein-related protein 10 OS=Mus musculus OX=10090 GN=Osbpl10 PE=1 SV=1	26.402	8.74674	103.8	99.5	106.3	95.8	109.4	96.3	91.2	97.4	101.1	99.1
Q9DBZ1	Inhibitor of nuclear factor kappa-B kinase-interacting protein OS=Mus musculus OX=10090 GN=Ikbip PE=1 SV=2	26.346	13.941	80.3	93.6	89.9	102.3	87.1	108.4	97.5	118.5	98.6	123.7
P99025	GTP cyclohydrolase 1 feedback regulatory protein OS=Mus musculus OX=10090 GN=Gchfr PE=1 SV=3	26.305	52.381	95.9	98.3	108.5	113.1	109	100.5	87.4	90.1	96.3	101
Q99LS3	Phosphoserine phosphatase OS=Mus musculus OX=10090 GN=Psph PE=1 SV=1	26.298	28.8889	95.9	98	95.2	104.7	96.8	103.2	95.5	103.3	102.2	105.3
Q80U95	Ubiquitin-protein ligase E3C OS=Mus musculus OX=10090 GN=Ube3c PE=1 SV=2	26.24	4.70914	82.5	80	90.5	92.2	93.1	103.8	85.6	132.4	114.3	125.7
Q8BH15	CCR4-NOT transcription complex subunit 10 OS=Mus musculus OX=10090 GN=Cnot10 PE=1 SV=1	25.924	7.25806	90.6	84.3	84.8	89.7	96.7	100.5	99.1	114.7	120.7	118.9
P67871	Casein kinase II subunit beta OS=Mus musculus OX=10090 GN=Csnk2b PE=1 SV=1	25.864	19.5349	115.5	100.1	104.4	105.6	110.1	88	87.1	93.5	106.2	89.6
O35988	Syndecan-4 OS=Mus musculus OX=10090 GN=Sdc4 PE=1 SV=1	25.861	15.1515	93.1	86.7	94.6	87.6	96.6	135.3	127.1	91.7	102.2	85.1
O35638	Cohesin subunit SA-2 OS=Mus musculus OX=10090 GN=Stag2 PE=1 SV=3	25.793	4.30544	81.9	84.5	89.1	98.6	98.7	104.2	97.7	120.5	114.6	110.1
Q3UFY7	7-methylguanosine phosphate-specific 5'-nucleotidase OS=Mus musculus OX=10090 GN=Nt5c3b PE=1 SV=3	25.77	15.6667	84.4	100.7	99.5	97.4	101.9	103.8	99	100.3	106.5	106.3
Q8CG70	Prolyl 3-hydroxylase 3 OS=Mus musculus OX=10090 GN=P3h3 PE=1 SV=1	25.757	6.69399	93.1	107	100	99.2	88.2	111.2	91.1	107.8	103.3	99
Q3V009	Transmembrane emp24 domain-containing protein 1 OS=Mus musculus OX=10090 GN=Tmed1 PE=1 SV=1	25.697	17.1806	95.4	84.4	83.1	89.4	110.5	100.3	114.9	101.5	114.5	106.1
Q9D6K8	FUN14 domain-containing protein 2 OS=Mus musculus OX=10090 GN=Fundc2 PE=1 SV=1	25.623	12.5828	128.2	112.4	111.8	100.1	118.8	79.2	88.5	88.1	85.9	87.1
P52800	Ephrin-B2 OS=Mus musculus OX=10090 GN=Efnb2 PE=1 SV=1	25.557	14.881	93.7	112.1	106	111.2	106.9	95.1	95.3	101.5	91.3	86.9
Q9CQS4	Solute carrier family 25 member 46 OS=Mus musculus OX=10090 GN=Slc25a46 PE=1 SV=1	25.525	10.2871	117.4	82.9	116.8	94.2	117.1	74.2	80.3	99.8	114.5	102.9
Q91X20	Set1/Ash2 histone methyltransferase complex subunit ASH2 OS=Mus musculus OX=10090 GN=Ash2l PE=1 SV=1	25.443	9.30979	103	104.2	114	108.5	96.5	100.3	94.6	91.3	93.4	94.2
Q924K8	Metastasis-associated protein MTA3 OS=Mus musculus OX=10090 GN=Mta3 PE=1 SV=1	25.364	10.8291	106.6	110.5	96.3	107.5	93.5	103.2	104.9	93.7	89.9	93.7
Q4PZA2	Endothelin-converting enzyme 1 OS=Mus musculus OX=10090 GN=Ece1 PE=1 SV=1	25.269	5.98179	110.2	92.9	99.4	97.2	92.7	99.2	95.3	101.3	105.9	105.8
Q80UU9	Membrane-associated progesterone receptor component 2 OS=Mus musculus OX=10090 GN=Pgrmc2 PE=1 SV=2	25.18	23.0415	110.3	99.3	104.7	94	98.5	94.5	89.8	106.9	101.2	100.7
Q9DB25	Dolichyl-phosphate beta-glucosyltransferase OS=Mus musculus OX=10090 GN=Alg5 PE=1 SV=1	25.116	16.0494	97.6	87.1	96.4	74.8	114.1	73.2	95.8	119.2	133.1	108.7
Q9Z2Q6	Septin-5 OS=Mus musculus OX=10090 GN=Septin5 PE=1 SV=2	25.033	20.5962	67.6	101.7	73.2	92.8	129.2	101.9	122.8	93	114.2	103.6
P17665	Cytochrome c oxidase subunit 7C, mitochondrial OS=Mus musculus OX=10090 GN=Cox7c PE=1 SV=1	24.791	38.0952	113.2	109.6	131.4	108.3	100.8	91.7	75.3	93.8	82.6	93.2
O35427	DNA-directed RNA polymerase III subunit RPC9 OS=Mus musculus OX=10090 GN=Crcp PE=2 SV=1	24.752	25.6757	92.2	83.4	95	99.3	99.5	98.5	112.1	106.4	108.2	105.3
Q9Z2A5	Arginyl-tRNA--protein transferase 1 OS=Mus musculus OX=10090 GN=Ate1 PE=1 SV=2	24.592	9.68992	93.3	95.3	95.7	96.7	97.7	105.6	95.4	108.6	104.7	107.1
Q9CTY5	Calcium uptake protein 3, mitochondrial OS=Mus musculus OX=10090 GN=Micu3 PE=2 SV=2	24.495	7.45698	109.9	90.5	126.9	95.5	120.1	84.3	89	92.2	96.6	95.1
Q8K2H2	Deubiquitinase OTUD6B OS=Mus musculus OX=10090 GN=Otud6b PE=1 SV=1	24.456	15.3061	116.8	80.7	91.9	142.8	81.1	110.2	95.1	94.5	82.4	104.7
Q91YY4	ATP synthase mitochondrial F1 complex assembly factor 2 OS=Mus musculus OX=10090 GN=Atpaf2 PE=1 SV=1	24.37	14.5329	110.6	96.9	111.5	96.5	115.7	80.9	90.1	97.6	100.5	99.8
Q8JZU0	NAD(P)H pyrophosphatase NUDT13, mitochondrial OS=Mus musculus OX=10090 GN=Nudt13 PE=1 SV=2	24.152	18.1818	97.7	95.4	115.8	109.4	100.6	100.5	90.7	89.3	108.1	92.5
Q9CXR1	Dehydrogenase/reductase SDR family member 7 OS=Mus musculus OX=10090 GN=Dhrs7 PE=1 SV=2	24.141	14.497	83.7	88.2	82.6	66.1	104.5	82.8	105.2	123.5	145.9	117.3
Q8K2C9	Very-long-chain (3R)-3-hydroxyacyl-CoA dehydratase 3 OS=Mus musculus OX=10090 GN=Hacd3 PE=1 SV=2	24.08	10.221	100.6	85.9	99.2	81.4	112.9	79.5	93.5	112.7	123.9	110.5
Q9CXK8	60S ribosome subunit biogenesis protein NIP7 homolog OS=Mus musculus OX=10090 GN=Nip7 PE=1 SV=1	23.956	37.7778	86.9	83.2	93.1	79.9	93.2	105.8	110.5	115.4	117.2	114.7
Q3UI43	BRISC and BRCA1-A complex member 1 OS=Mus musculus OX=10090 GN=Babam1 PE=1 SV=1	23.771	10.5105	94.6	88.5	89.4	93.6	94.3	106.9	99.3	107.7	110.5	115.1
Q8BGD8	Cytochrome c oxidase assembly factor 6 homolog OS=Mus musculus OX=10090 GN=Coa6 PE=1 SV=1	23.697	51.8987	113.7	113	121.2	123.4	110.1	90.2	85.1	79.7	81.9	81.8
Q9CZK6	Ankyrin repeat and SAM domain-containing protein 3 OS=Mus musculus OX=10090 GN=Anks3 PE=1 SV=2	23.575	10.0763	111.8	100.9	114.8	107.3	99	91.7	91.9	93.5	95	94.1
Q9JKZ2	Sodium/myo-inositol cotransporter OS=Mus musculus OX=10090 GN=Slc5a3 PE=1 SV=2	23.534	6.26741	88.5	105.2	103.6	105.1	103	100.6	77.5	113.4	96.5	106.5
Q3UNW5	Transcription factor CP2-like protein 1 OS=Mus musculus OX=10090 GN=Tfcp2l1 PE=1 SV=2	23.371	10.4384	90.5	104.5	90.8	110.1	102.8	103.7	97.6	105.6	94.9	99.6
Q924L1	LETM1 domain-containing protein 1 OS=Mus musculus OX=10090 GN=Letmd1 PE=1 SV=1	23.15	13.6111	103.1	88.3	103.1	85.7	117.9	87.3	93.4	101.1	116.1	104
Q9CPT3	N-acylneuraminate-9-phosphatase OS=Mus musculus OX=10090 GN=Nanp PE=1 SV=1	22.895	14.9194	94.2	92.8	96.8	104.4	99	102.1	86.7	112.6	101.2	110.2
Q71FD5	E3 ubiquitin-protein ligase ZNRF2 OS=Mus musculus OX=10090 GN=Znrf2 PE=1 SV=1	22.836	21.0084	98	95.2	99.7	102.7	101.1	112.9	103.6	95	91.9	99.9
Q3TKT4	Transcription activator BRG1 OS=Mus musculus OX=10090 GN=Smarca4 PE=1 SV=1	22.82	3.47179	82.4	90.1	88.8	75.8	90.2	102	104.1	123.1	119.6	123.9
Q91VW3	SH3 domain-binding glutamic acid-rich-like protein 3 OS=Mus musculus OX=10090 GN=Sh3bgrl3 PE=1 SV=1	22.793	38.7097	72.9	90.8	85.6	96.4	75.7	132	107.6	123.7	106.2	109.1
Q9CXV1	Succinate dehydrogenase [ubiquinone] cytochrome b small subunit, mitochondrial OS=Mus musculus OX=10090 GN=Sdhd PE=1 SV=2	22.614	21.3836	112.3	109.6	96.5	103.2	111.7	88.8	84.9	96.9	106.2	89.9
Q8BH35	Complement component C8 beta chain OS=Mus musculus OX=10090 GN=C8b PE=1 SV=1	22.518	8.65874	86.8	112.2	83.5	103.6	95.5	133.3	113.8	91.5	80.8	99.1
O54786	DNA fragmentation factor subunit alpha OS=Mus musculus OX=10090 GN=Dffa PE=1 SV=2	22.507	13.2931	95.9	94.1	105.2	95.6	92.8	117.4	118.6	90.1	92.6	97.7
P22361	Hepatocyte nuclear factor 1-alpha OS=Mus musculus OX=10090 GN=Hnf1a PE=1 SV=2	22.504	6.6879	106.3	100	114.1	106.9	109.7	98.2	100.7	79.4	91.1	93.7
O09049	Regenerating islet-derived protein 3-gamma OS=Mus musculus OX=10090 GN=Reg3g PE=1 SV=1	22.451	29.8851	96.1	214.6	99.5	82.4	61.7	69.1	76.8	113.3	94.1	92.4
Q8BHE8	m-AAA protease-interacting protein 1, mitochondrial OS=Mus musculus OX=10090 GN=Maip1 PE=1 SV=1	22.272	11.6838	116.6	98.1	109.4	94.7	118.2	75.3	90.1	97.6	106	94
Q8R1T1	Charged multivesicular body protein 7 OS=Mus musculus OX=10090 GN=Chmp7 PE=1 SV=1	22.233	12.8603	98.5	90.4	95.6	100.8	107.2	94.2	94.4	99.1	115	104.9
Q9CPQ3	Mitochondrial import receptor subunit TOM22 homolog OS=Mus musculus OX=10090 GN=Tomm22 PE=1 SV=3	22.215	27.4648	115.3	86.1	99.4	119.7	96.6	98.9	78.3	99.6	101.1	105
Q9Z223	Molybdopterin synthase catalytic subunit OS=Mus musculus OX=10090 GN=Mocs2 PE=1 SV=3	22.194	25.3968	98.5	97.7	113.6	113.1	106.1	105.4	93.5	87.5	91.4	93.2
Q9D708	Protein S100-A16 OS=Mus musculus OX=10090 GN=S100a16 PE=1 SV=1	22.159	37.0968	82.5	91.9	98.4	95.6	94.3	107	105.8	108	107.6	109
Q8BGS2	BolA-like protein 2 OS=Mus musculus OX=10090 GN=Bola2 PE=1 SV=1	22.115	40.6977	93.8	104.4	105.1	107.8	91.3	106	102.1	100.7	90.3	98.6
Q9CQJ4	E3 ubiquitin-protein ligase RING2 OS=Mus musculus OX=10090 GN=Rnf2 PE=1 SV=1	22.026	22.619	87.6	93	91.9	97.3	109.6	101	107.3	103.8	107.1	101.5
Q6P8I4	PEST proteolytic signal-containing nuclear protein OS=Mus musculus OX=10090 GN=Pcnp PE=1 SV=1	22.019	23.5955	94.3	99	98.4	111.7	97	104.9	106.1	95.5	105.3	87.8
Q3UZP0	MARVEL domain-containing protein 2 OS=Mus musculus OX=10090 GN=Marveld2 PE=1 SV=1	21.994	8.28829	87.2	79.3	91.7	89.7	82.6	110	98	125.2	120.5	115.7
Q5SVL6	Rap1 GTPase-activating protein 2 OS=Mus musculus OX=10090 GN=Rap1gap2 PE=1 SV=1	21.983	6.17978	113.8	104.5	115	108.2	115.2	88.3	82.2	88.4	93.9	90.4
Q80U56	Late secretory pathway protein AVL9 homolog OS=Mus musculus OX=10090 GN=Avl9 PE=1 SV=2	21.97	7.24191	93.1	89.2	93.1	103.4	104	105.8	98.6	109.2	103.8	99.7
P12804	Fibroleukin OS=Mus musculus OX=10090 GN=Fgl2 PE=1 SV=1	21.779	9.02778	38.6	50.7	40.8	49.7	41.9	172.3	151.9	147.9	146	160.1
A2ALU4	Protein Shroom2 OS=Mus musculus OX=10090 GN=Shroom2 PE=1 SV=1	21.753	3.78123	86.6	93.8	95.8	86.8	79.3	117.4	97.5	108.9	113	120.9
Q9D486	C-Maf-inducing protein OS=Mus musculus OX=10090 GN=Cmip PE=1 SV=3	21.606	10.2199	106.2	95.7	99.5	104.8	100.8	103.6	87.5	101.5	99.1	101.3
Q69ZW3	EH domain-binding protein 1 OS=Mus musculus OX=10090 GN=Ehbp1 PE=1 SV=3	21.481	2.76198	90.4	92.9	95	95	86.4	112.1	104.3	106.7	107.5	109.9
Q91X58	AN1-type zinc finger protein 2B OS=Mus musculus OX=10090 GN=Zfand2b PE=1 SV=1	21.47	14.0078	92.1	106.4	112.6	108	111.9	90.5	101.9	85.2	92.2	99.2
Q99J09	Methylosome protein 50 OS=Mus musculus OX=10090 GN=Wdr77 PE=1 SV=1	21.389	15.4971	89.7	108.5	92.8	103.6	84	102.8	103	107.9	101.7	106.1
Q920B9	FACT complex subunit SPT16 OS=Mus musculus OX=10090 GN=Supt16h PE=1 SV=2	21.369	4.68004	84.6	87.9	79.1	84.2	96.7	113.5	101.7	118.5	118.8	115.1
Q8BYA0	Tubulin-specific chaperone D OS=Mus musculus OX=10090 GN=Tbcd PE=1 SV=1	21.348	4.26421	88.3	101.2	95.5	95.9	99.4	94.8	93.3	102.5	116.7	112.5
Q9DCF9	Translocon-associated protein subunit gamma OS=Mus musculus OX=10090 GN=Ssr3 PE=1 SV=1	21.216	15.6757	103.3	72.5	89.7	76.9	102.3	79.6	89.2	124.2	134.4	127.9
Q8C6B2	Rhotekin OS=Mus musculus OX=10090 GN=Rtkn PE=1 SV=3	21.214	7.2695	77.8	77.8	80.4	101	83.9	114	90.4	132.8	114.9	127
P02535	Keratin, type I cytoskeletal 10 OS=Mus musculus OX=10090 GN=Krt10 PE=1 SV=3	21.187	6.49123	259.1	59.8	84.3	128.8	94.6	63.1	101.1	68.5	77.8	62.9
Q64362	AKT-interacting protein OS=Mus musculus OX=10090 GN=Aktip PE=1 SV=1	21.159	9.93151	93.4	91.9	85.1	86	101.9	97.6	99.3	114.7	115.3	115
Q91W69	Epsin-3 OS=Mus musculus OX=10090 GN=Epn3 PE=1 SV=1	21.11	9.43396	76.5	92.2	91.2	96.5	87.4	118.4	110.8	119.7	107.7	99.7
Q61387	Cytochrome c oxidase subunit 7A-related protein, mitochondrial OS=Mus musculus OX=10090 GN=Cox7a2l PE=1 SV=1	20.997	41.4414	118	114.5	117	105.2	126.7	83.3	83.6	87.6	84.1	80
Q8BGF3	Dynein axonemal assembly factor 10 OS=Mus musculus OX=10090 GN=Dnaaf10 PE=1 SV=1	20.978	17.6471	88.9	85	90.8	100	89.8	108.2	96.8	112	106.6	121.9
Q3TAS6	ER membrane protein complex subunit 10 OS=Mus musculus OX=10090 GN=Emc10 PE=2 SV=2	20.972	12.4031	114.1	106.6	103.4	96.8	108.9	87.3	93.6	93.1	96.3	100.1
Q8C7D2	Protein cereblon OS=Mus musculus OX=10090 GN=Crbn PE=1 SV=1	20.971	8.76404	108.6	90.9	99.8	91.9	111.1	87.8	102.4	104.2	110.8	92.6
P06330	Ig heavy chain V region AC38 205.12 OS=Mus musculus OX=10090 PE=1 SV=1	20.899	37.2881	80.5	84	106.4	87.5	80.2	138.3	122.2	95.9	87.5	117.5
Q8R2Y0	Monoacylglycerol lipase ABHD6 OS=Mus musculus OX=10090 GN=Abhd6 PE=1 SV=1	20.892	10.119	79.1	79.2	108.9	73.5	101.1	84.3	108.1	120	127.2	118.6
O35405	5'-3' exonuclease PLD3 OS=Mus musculus OX=10090 GN=Pld3 PE=1 SV=1	20.883	9.22131	99.6	86.2	103.6	88.3	96.6	98.1	105	108.7	106.9	107
P59913	Protein-L-isoaspartate O-methyltransferase domain-containing protein 1 OS=Mus musculus OX=10090 GN=Pcmtd1 PE=1 SV=1	20.858	10.084	104.7	96.7	108.7	103.7	113.3	90.2	86.8	92.8	104.4	98.6
P23589	Carbonic anhydrase 5A, mitochondrial OS=Mus musculus OX=10090 GN=Ca5a PE=1 SV=2	20.849	15.7191	102.4	136.3	95.5	127.2	105.4	96.6	82.1	79.2	87.5	87.8
Q9CWG9	Biogenesis of lysosome-related organelles complex 1 subunit 2 OS=Mus musculus OX=10090 GN=Bloc1s2 PE=1 SV=1	20.822	22.3776	87.4	101.1	89	107.1	91.7	115.3	96.6	107.3	98.5	106
Q8BXN7	Protein phosphatase 1K, mitochondrial OS=Mus musculus OX=10090 GN=Ppm1k PE=1 SV=1	20.756	9.13978	88	111.1	96.9	107.5	109.6	98.4	105.6	84.9	99.5	98.6
Q80XS6	Protein Smaug homolog 2 OS=Mus musculus OX=10090 GN=Samd4b PE=1 SV=1	20.752	7.27802	83.2	78.1	77.8	88.4	83.5	117.5	107.9	116.9	130.7	116.2
P20444	Protein kinase C alpha type OS=Mus musculus OX=10090 GN=Prkca PE=1 SV=3	20.639	4.91071	103.5	92.8	98.5	87.8	102.2	98.8	109.5	101.7	91.8	113.4
Q3UY34	Protein CUSTOS OS=Mus musculus OX=10090 GN=Custos PE=2 SV=1	20.622	9.375	95.1	93.9	102.7	106.7	86.5	95.2	98.5	102.6	104.7	114.2
Q9D666	SUN domain-containing protein 1 OS=Mus musculus OX=10090 GN=Sun1 PE=1 SV=2	20.605	5.47645	91.6	96.3	99.9	84.1	98.9	97.5	94.9	106.1	121.9	108.8
Q91X51	Golgi reassembly-stacking protein 1 OS=Mus musculus OX=10090 GN=Gorasp1 PE=1 SV=3	20.597	11.2108	91.9	97.3	95.7	101.9	100.6	101.2	94.9	105.9	104.5	106.1
P59708	Splicing factor 3B subunit 6 OS=Mus musculus OX=10090 GN=Sf3b6 PE=1 SV=1	20.59	28	84.1	91.9	94.7	98.6	88.6	118.1	107.1	106.5	102.4	108.1
Q9Z2G6	Protein sel-1 homolog 1 OS=Mus musculus OX=10090 GN=Sel1l PE=1 SV=2	20.564	5.06329	88.4	88	81.8	105.2	94.2	93.3	92.5	123	114.9	118.7
Q61025	Intraflagellar transport protein 20 homolog OS=Mus musculus OX=10090 GN=Ift20 PE=1 SV=1	20.548	26.5152	89.6	107.9	113.3	111.9	96.2	102.6	95.2	91.6	91.2	100.5
Q921I2	Kelch domain-containing protein 4 OS=Mus musculus OX=10090 GN=Klhdc4 PE=2 SV=2	20.493	7.02055	103.1	86	102.9	106.3	92.7	97.6	100.6	104.5	107.5	98.9
Q8BTE5	Protein CEBPZOS OS=Mus musculus OX=10090 GN=Cebpzos PE=3 SV=2	20.452	41.25	96.5	104.7	106.4	110.2	100.6	101.3	90.7	100.2	89.8	99.7
Q9CQA5	Mediator of RNA polymerase II transcription subunit 4 OS=Mus musculus OX=10090 GN=Med4 PE=2 SV=1	20.332	11.8519	83.1	91.4	85.8	96.8	91.7	112.5	103.1	112.7	107.5	115.4
Q3UM29	Conserved oligomeric Golgi complex subunit 7 OS=Mus musculus OX=10090 GN=Cog7 PE=1 SV=1	20.331	6.36364	97.1	99	98.8	86.7	98.2	93.9	103.6	101.6	113.3	107.8
Q8C650	Septin-10 OS=Mus musculus OX=10090 GN=Septin10 PE=1 SV=1	20.299	10.177	79.9	109.7	77.9	90	80.9	108.5	113.9	126.6	109.6	102.9
Q9DCG9	Multifunctional methyltransferase subunit TRM112-like protein OS=Mus musculus OX=10090 GN=Trmt112 PE=1 SV=1	20.265	33.6	91.7	93.4	95.4	104.9	81.6	110.1	96.9	111.7	104.5	109.7
Q8CI11	Guanine nucleotide-binding protein-like 3 OS=Mus musculus OX=10090 GN=Gnl3 PE=1 SV=2	20.253	10.7807	64.3	81.9	81.9	81.2	80.2	113.2	121.4	116.6	124.7	134.5
Q8K4L0	ATP-dependent RNA helicase DDX54 OS=Mus musculus OX=10090 GN=Ddx54 PE=1 SV=1	20.024	4.57666	87.2	81.6	90.6	88.1	85.9	110.1	95.3	123.4	121.6	116.2
Q91VU7	Pseudouridylate synthase 7 homolog OS=Mus musculus OX=10090 GN=Pus7 PE=2 SV=2	19.968	10.6061	86.6	96.5	98.2	92	93.6	98.6	104	110.5	107.8	112
Q9CPP0	Nucleoplasmin-3 OS=Mus musculus OX=10090 GN=Npm3 PE=1 SV=3	19.912	25.1429	96.8	95.9	104.6	100.4	90	105.9	94.9	103.7	101.9	105.8
Q9CQ71	Replication protein A 14 kDa subunit OS=Mus musculus OX=10090 GN=Rpa3 PE=1 SV=1	19.88	40.4959	86.4	105.2	95	99.8	93.2	111.6	109.8	101.4	98	99.6
Q3V3R1	Monofunctional C1-tetrahydrofolate synthase, mitochondrial OS=Mus musculus OX=10090 GN=Mthfd1l PE=1 SV=2	19.87	4.913	80.1	78.1	82.4	95.3	82.9	107.3	101.1	123.5	117	132.4
P56135	ATP synthase subunit f, mitochondrial OS=Mus musculus OX=10090 GN=Atp5mf PE=1 SV=3	19.842	32.9545	114.5	112.5	118.7	97.5	113.3	79.9	92.9	89.2	90.9	90.7
Q8JZZ7	Adhesion G protein-coupled receptor L2 OS=Mus musculus OX=10090 GN=Adgrl2 PE=1 SV=3	19.782	2.42098	78.5	79.2	81.2	106.1	104.8	117.1	108.7	111.3	104.5	108.6
Q61112	45 kDa calcium-binding protein OS=Mus musculus OX=10090 GN=Sdf4 PE=1 SV=1	19.704	8.03324	56.8	86.7	79.8	81	69.6	126.2	116.9	126.7	126.1	130.4
Q9Z0T9	Integrin beta-6 OS=Mus musculus OX=10090 GN=Itgb6 PE=1 SV=1	19.452	7.24269	96.9	100.3	101.6	88.4	91.2	93	105.8	108.1	107.7	106.9
P50405	Pulmonary surfactant-associated protein B OS=Mus musculus OX=10090 GN=Sftpb PE=1 SV=1	19.441	11.6711	102.4	82.2	75.8	80.8	116.6	97.8	118.1	99	115.4	111.9
Q8K114	Integrator complex subunit 9 OS=Mus musculus OX=10090 GN=Ints9 PE=1 SV=1	19.409	8.05471	102.2	90.4	101.5	89.2	105.4	93.8	94.4	102.4	115.8	104.9
Q9DBT5	AMP deaminase 2 OS=Mus musculus OX=10090 GN=Ampd2 PE=1 SV=1	19.278	4.13534	104.5	98.6	97.5	91	96.9	83.4	109.4	102.4	113.6	102.7
Q91VU0	Protein FAM3C OS=Mus musculus OX=10090 GN=Fam3c PE=1 SV=1	19.178	15.859	102.7	90.7	96.8	89.9	96.2	96.7	95	114.9	111.3	105.9
Q8BKT7	THO complex subunit 5 homolog OS=Mus musculus OX=10090 GN=Thoc5 PE=1 SV=2	19.072	6.14934	93.5	84.9	86.7	85.3	97.3	92.2	100.1	119.9	118.5	121.6
O35594	Intraflagellar transport protein 81 homolog OS=Mus musculus OX=10090 GN=Ift81 PE=1 SV=4	19.051	3.69822	74.2	95.6	86.4	99	110.8	99	120.8	101.7	104.3	108.2
O88838	SPRY domain-containing SOCS box protein 2 OS=Mus musculus OX=10090 GN=Spsb2 PE=1 SV=1	18.971	23.1061	85.3	89.3	90.4	101.4	90.3	100.5	92.3	112.4	107.3	130.8
Q6ZPZ3	Zinc finger CCCH domain-containing protein 4 OS=Mus musculus OX=10090 GN=Zc3h4 PE=1 SV=2	18.944	4.1411	83.9	93.5	96	99.4	96.2	106.9	103	102.6	112.2	106.3
Q9DCI9	39S ribosomal protein L32, mitochondrial OS=Mus musculus OX=10090 GN=Mrpl32 PE=1 SV=1	18.809	14.4385	123.8	81.5	131.5	135.1	88.2	99.1	58	87.2	91.3	104.2
Q99MS3	Mpv17-like protein OS=Mus musculus OX=10090 GN=Mpv17l PE=1 SV=2	18.675	15.9794	134.7	94	92.5	97	121.7	76.6	72.4	99	113.6	98.5
P58158	Galactosylgalactosylxylosylprotein 3-beta-glucuronosyltransferase 3 OS=Mus musculus OX=10090 GN=B3gat3 PE=1 SV=1	18.675	22.6866	103.5	93.2	97.8	88.4	106.5	94	92.3	107.7	110.2	106.4
Q8VDS4	Regulation of nuclear pre-mRNA domain-containing protein 1A OS=Mus musculus OX=10090 GN=Rprd1a PE=1 SV=1	18.672	15.7051	96.4	107.5	104	103.4	102.5	114	100.2	94.6	91.5	85.9
Q9D7E4	UPF0449 protein C19orf25 homolog OS=Mus musculus OX=10090 PE=1 SV=1	18.524	54.1284	86.9	93.4	86.7	100.6	91.2	113.7	93	119.1	107.5	107.9
Q9DB76	ER membrane protein complex subunit 9 OS=Mus musculus OX=10090 GN=Emc9 PE=1 SV=1	18.441	16.5049	115.7	94.9	99.4	104.6	114.3	86	84.6	97.4	101	102.1
Q8K199	COX assembly mitochondrial protein 2 homolog OS=Mus musculus OX=10090 GN=Cmc2 PE=3 SV=1	18.384	30.3797	100.9	105.4	108.3	113.7	107.6	101.6	88.4	86.8	94.6	92.6
Q6ZWZ2	Ubiquitin-conjugating enzyme E2 R2 OS=Mus musculus OX=10090 GN=Ube2r2 PE=1 SV=1	18.37	22.6891	112.6	101.4	103.5	105.9	115.2	99.4	97	95.3	87.2	82.5
Q62084	Protein phosphatase 1 regulatory subunit 14B OS=Mus musculus OX=10090 GN=Ppp1r14b PE=1 SV=2	18.333	23.8095	77.1	104.6	93.4	89.6	85.4	105.7	111	108.7	111.3	113.2
Q8BQ47	Protein canopy homolog 4 OS=Mus musculus OX=10090 GN=Cnpy4 PE=1 SV=1	18.308	14.6939	94.8	92.1	102	94.8	94.3	103.1	98.9	108.9	106.3	104.7
Q8CHT1	Ephexin-1 OS=Mus musculus OX=10090 GN=Ngef PE=1 SV=1	18.252	6.05634	112.4	87.2	102.8	97.2	116.7	87.3	99.3	99.2	92.9	105
Q9D187	Cytosolic iron-sulfur assembly component 2B OS=Mus musculus OX=10090 GN=Ciao2b PE=1 SV=1	18.25	21.4724	92.4	107.1	97.5	106.7	100.4	104.9	97.1	100.3	95.3	98.4
Q9Z0L8	Gamma-glutamyl hydrolase OS=Mus musculus OX=10090 GN=Ggh PE=1 SV=2	18.218	14.1956	79.8	85.5	105.9	104	88.3	110	101	114.1	101.7	109.7
Q91VJ4	Serine/threonine-protein kinase 38 OS=Mus musculus OX=10090 GN=Stk38 PE=1 SV=1	18.189	10.5376	93.4	92.7	101.2	88.5	109.7	92.8	100	108.2	109	104.5
Q8C163	Nuclease EXOG, mitochondrial OS=Mus musculus OX=10090 GN=Exog PE=1 SV=1	18.175	8.96739	114.5	86	112	132.9	87.4	113.8	86.4	91.2	74.3	101.5
Q9CYL5	Golgi-associated plant pathogenesis-related protein 1 OS=Mus musculus OX=10090 GN=Glipr2 PE=1 SV=3	18.159	31.1688	78.3	73	82.7	83.2	82.3	116.3	108.2	119.6	126	130.4
P11928	2'-5'-oligoadenylate synthase 1A OS=Mus musculus OX=10090 GN=Oas1a PE=1 SV=2	18.118	11.9891	52.2	76.7	49.3	54.1	51	99.8	117.1	136.8	193.8	169.2
Q8BXL7	ADP-ribosylation factor-related protein 1 OS=Mus musculus OX=10090 GN=Arfrp1 PE=1 SV=2	18.09	19.403	98	98.5	96	99.4	99.9	97.9	93.9	105.5	104.9	106
P97433	Rho guanine nucleotide exchange factor 28 OS=Mus musculus OX=10090 GN=Arhgef28 PE=1 SV=1	18.086	2.06734	98.8	86.3	97.4	92.2	103.1	98.1	104.3	100.6	114.8	104.3
Q8R2U4	N-terminal Xaa-Pro-Lys N-methyltransferase 1 OS=Mus musculus OX=10090 GN=Ntmt1 PE=1 SV=3	18.07	13.4529	81.2	83.2	82	83.1	89.2	104.1	108.4	122.2	126.6	120.1
Q8BH44	Coronin-2B OS=Mus musculus OX=10090 GN=Coro2b PE=1 SV=2	18.051	7.91667	87	80.3	87.9	92.4	105.5	107.9	100.8	114.4	112.8	111
Q8BVU0	DISP complex protein LRCH3 OS=Mus musculus OX=10090 GN=Lrch3 PE=1 SV=3	18.046	4.62725	92.4	86.4	87.4	94	89.8	119.4	94.8	112.2	111.2	112.4
Q9R1Z7	6-pyruvoyl tetrahydrobiopterin synthase OS=Mus musculus OX=10090 GN=Pts PE=1 SV=2	18.032	17.3611	97	128.4	107.1	115.8	106.6	97	94.1	85.3	78.5	90.3
Q3TC46	Protein PAT1 homolog 1 OS=Mus musculus OX=10090 GN=Patl1 PE=1 SV=2	17.938	4.93506	74.1	134.2	88.7	92.4	104.5	98.2	84.6	106.1	114	103.2
P13595	Neural cell adhesion molecule 1 OS=Mus musculus OX=10090 GN=Ncam1 PE=1 SV=3	17.912	7.80269	96.8	95.2	90.7	89.9	96.3	111.2	92	113.2	102.6	112.1
Q8BHL8	Proteasome inhibitor PI31 subunit OS=Mus musculus OX=10090 GN=Psmf1 PE=1 SV=1	17.898	10.7011	88	86.6	90	91.8	92.4	99.8	108.8	112.2	114.3	116.1
Q9WTS2	Alpha-(1,6)-fucosyltransferase OS=Mus musculus OX=10090 GN=Fut8 PE=1 SV=2	17.877	5.04348	106.9	91.5	90.3	87.9	108.5	85.7	84.3	116.1	117.8	111.2
Q9Z1T6	1-phosphatidylinositol 3-phosphate 5-kinase OS=Mus musculus OX=10090 GN=Pikfyve PE=1 SV=3	17.868	2.57511	107.2	73.1	85.5	113.7	80.5	113.5	101.6	108.4	100.7	115.8
Q9CQ56	Vesicle transport protein USE1 OS=Mus musculus OX=10090 GN=Use1 PE=1 SV=1	17.676	10	85.7	74.9	79.3	76	79.7	99.5	106.5	121.5	133.9	143.1
Q8C142	Low density lipoprotein receptor adapter protein 1 OS=Mus musculus OX=10090 GN=Ldlrap1 PE=1 SV=3	17.639	9.74026	103.5	87.8	102.1	87	110.2	92.6	99.7	99.1	116.4	101.6
Q8CD15	Ribosomal oxygenase 2 OS=Mus musculus OX=10090 GN=Riox2 PE=1 SV=2	17.634	7.31183	77.2	84	89.7	84.9	96.7	95.3	110.4	109.8	130.7	121.2
Q6TYB5	Fasciculation and elongation protein zeta-2 OS=Mus musculus OX=10090 GN=Fez2 PE=2 SV=1	17.552	17.5287	92.9	87.8	97.3	95.9	102.3	102.8	106.5	94.4	111.8	108.3
P35283	Ras-related protein Rab-12 OS=Mus musculus OX=10090 GN=Rab12 PE=1 SV=3	17.525	13.9918	93	93.2	96.4	91.5	101.5	101.3	90.4	112.5	105.9	114.4
Q8BGR6	ADP-ribosylation factor-like protein 15 OS=Mus musculus OX=10090 GN=Arl15 PE=1 SV=1	17.465	21.0784	104.1	101.5	91.7	103.1	89.7	104.8	91.8	102.7	101.9	108.6
Q9JM63	ATP-sensitive inward rectifier potassium channel 10 OS=Mus musculus OX=10090 GN=Kcnj10 PE=1 SV=1	17.433	10.2902	140.6	98.2	127.6	81.7	142.1	50.6	75	88.6	108.7	86.9
Q8CII2	Cell division cycle protein 123 homolog OS=Mus musculus OX=10090 GN=Cdc123 PE=1 SV=2	17.403	10.7143	99.9	92.2	84.9	107.2	93.9	90.4	96.5	108.8	110.8	115.4
Q8R4K2	Interleukin-1 receptor-associated kinase 4 OS=Mus musculus OX=10090 GN=Irak4 PE=1 SV=1	17.363	7.18954	78.1	84.7	84	89.6	93.6	114.9	105.8	121	107.3	120.9
P48760	Folylpolyglutamate synthase, mitochondrial OS=Mus musculus OX=10090 GN=Fpgs PE=1 SV=3	17.298	12.4361	97.4	85.9	101.5	89.2	102	83.8	92.8	113.8	125.6	108.2
Q8BM85	TBC domain-containing protein kinase-like protein OS=Mus musculus OX=10090 GN=Tbck PE=1 SV=1	17.261	6.03675	78.8	76.2	84.6	96	96.1	114.1	91.4	125.2	118.4	119.2
Q9CR89	Endoplasmic reticulum-Golgi intermediate compartment protein 2 OS=Mus musculus OX=10090 GN=Ergic2 PE=1 SV=1	17.174	10.8753	97.7	77.3	82.7	78.5	102.7	84.2	90.1	110.4	125.5	150.9
B8ZXI1	Queuine tRNA-ribosyltransferase accessory subunit 2 OS=Mus musculus OX=10090 GN=Qtrt2 PE=1 SV=2	17.16	9.39759	94.8	106.2	98.5	90.7	106.3	89.8	100.7	99.7	105.7	107.6
A6H5X4	PHD finger protein 11 OS=Mus musculus OX=10090 GN=Phf11 PE=2 SV=1	17.095	8.90208	54.4	92	54.1	63.4	51.3	145	123.6	134.5	149.5	132.3
B2RWS6	Histone acetyltransferase p300 OS=Mus musculus OX=10090 GN=Ep300 PE=1 SV=2	17.079	1.82421	75.9	80.1	86.6	99.4	103.1	109.1	101.5	105.1	108.3	130.9
O35728	Cytochrome P450 4A14 OS=Mus musculus OX=10090 GN=Cyp4a14 PE=1 SV=1	17.073	8.48126	76	74.5	84	76.4	66.6	177.8	137.7	98.4	92.7	115.9
Q9JJR8	Transmembrane protein 9B OS=Mus musculus OX=10090 GN=Tmem9b PE=1 SV=1	17.037	24.6231	115.8	87.9	102.1	89.6	99.8	92.3	92.6	104.8	107.2	107.9
Q99MR1	GRB10-interacting GYF protein 1 OS=Mus musculus OX=10090 GN=Gigyf1 PE=1 SV=2	16.996	5.74713	93.3	94.7	90.4	102.2	93.7	113.9	102	94.9	106.9	108.1
Q8CFI2	Ubiquitin-conjugating enzyme E2 R1 OS=Mus musculus OX=10090 GN=Cdc34 PE=1 SV=1	16.995	22.9787	95.7	81	83.3	86	82	96.2	104.6	119.8	125.8	125.8
Q9CQ45	Neudesin OS=Mus musculus OX=10090 GN=Nenf PE=1 SV=1	16.926	21.0526	97.7	95.7	96.5	97.4	93.9	98.5	90.3	109	106.8	114.3
Q8VD62	UPF0696 protein C11orf68 homolog OS=Mus musculus OX=10090 GN=Bles03 PE=1 SV=2	16.914	23.4899	97.1	93.5	101.9	115.4	95.3	99.8	97.3	102.7	97.9	99.3
Q60996	Serine/threonine-protein phosphatase 2A 56 kDa regulatory subunit gamma isoform OS=Mus musculus OX=10090 GN=Ppp2r5c PE=1 SV=2	16.755	9.92366	93.5	89.7	100.4	100.8	94.6	104.6	93.3	114.8	106.8	101.6
Q9DA03	Complex III assembly factor LYRM7 OS=Mus musculus OX=10090 GN=Lyrm7 PE=3 SV=2	16.724	32.6923	101	106	101.4	117.8	107.4	98.7	87.5	93.6	93.5	93.1
Q5U462	CUB domain-containing protein 1 OS=Mus musculus OX=10090 GN=Cdcp1 PE=2 SV=1	16.698	4.08163	105.3	80.1	84.9	81	96.7	93.4	109.8	106.3	125.5	117.1
Q9CZB0	Succinate dehydrogenase cytochrome b560 subunit, mitochondrial OS=Mus musculus OX=10090 GN=Sdhc PE=1 SV=1	16.678	21.3018	135.5	110.3	120.9	94.2	121.5	73.7	97.9	70	95.1	80.9
Q8CG14	Complement C1s-A subcomponent OS=Mus musculus OX=10090 GN=C1sa PE=2 SV=2	16.676	8.57558	82.5	102	90.4	95.6	93.6	118.5	106.3	104.1	97.6	109.3
Q8BHL3	TBC1 domain family member 10B OS=Mus musculus OX=10090 GN=Tbc1d10b PE=1 SV=2	16.662	4.01003	121.3	110.6	140.9	78.3	103	74.8	90.2	90.6	100.5	89.7
Q8C5L3	CCR4-NOT transcription complex subunit 2 OS=Mus musculus OX=10090 GN=Cnot2 PE=1 SV=2	16.638	7.03704	87.8	83.5	91.9	96.1	85.5	97.4	109.1	113.4	116.1	119.1
Q8C092	Transcription initiation factor TFIID subunit 5 OS=Mus musculus OX=10090 GN=Taf5 PE=1 SV=1	16.618	4.36954	98.3	96.8	111.1	101.1	92.6	106.9	99.5	96.3	98.1	99.2
Q99K70	Ras-related GTP-binding protein C OS=Mus musculus OX=10090 GN=Rragc PE=1 SV=1	16.52	10.804	97.6	96.3	90.3	103.9	100.6	92.2	99.7	104.2	110.3	105
Q8BGF6	ELMO domain-containing protein 2 OS=Mus musculus OX=10090 GN=Elmod2 PE=1 SV=1	16.517	10.2389	102.6	89.5	99.5	91	94.3	88.8	93.4	110.2	114.1	116.6
Q5SSI6	U3 small nucleolar RNA-associated protein 18 homolog OS=Mus musculus OX=10090 GN=Utp18 PE=1 SV=1	16.505	9.23913	87.7	93	116.7	84	107.4	83.4	123.6	94.7	100.4	109.1
P97452	Ribosome biogenesis protein BOP1 OS=Mus musculus OX=10090 GN=Bop1 PE=1 SV=1	16.461	5.87432	87.1	78.2	93.5	87.3	96.5	105.9	105.2	109.1	110.4	126.9
Q8C4Q6	Axin interactor, dorsalization-associated protein OS=Mus musculus OX=10090 GN=Aida PE=1 SV=1	16.41	10.8197	63.8	86.5	73.2	75.9	72.5	129.6	129.7	120.5	124.4	124
D3Z7Q2	Small integral membrane protein 20 OS=Mus musculus OX=10090 GN=Smim20 PE=1 SV=1	16.386	37.6812	126.7	111.3	117.6	108.2	110.9	82.1	86.8	81.3	91.1	83.9
Q9D281	Protein Noxp20 OS=Mus musculus OX=10090 GN=Fam114a1 PE=1 SV=1	16.316	6.32689	102.4	94.8	93.5	107.3	93.4	101	94.4	98.3	99.6	115.2
Q8R2N2	U3 small nucleolar RNA-associated protein 4 homolog OS=Mus musculus OX=10090 GN=Utp4 PE=2 SV=3	16.265	6.12245	88	82.2	91.7	91.2	103.4	96.5	86.6	105.8	144.1	110.6
Q8BTE0	Succinate dehydrogenase assembly factor 4, mitochondrial OS=Mus musculus OX=10090 GN=Sdhaf4 PE=3 SV=2	16.184	41.3462	87.9	101.8	90.4	113.4	89.1	118.6	84.9	111.9	96.1	105.8
F2Z461	E3 ISG15--protein ligase Herc6 OS=Mus musculus OX=10090 GN=Herc6 PE=2 SV=1	16.171	3.98804	66.7	78.9	75.1	93.9	77.6	116.2	121.4	110.2	131.6	128.4
Q64373	Bcl-2-like protein 1 OS=Mus musculus OX=10090 GN=Bcl2l1 PE=1 SV=1	16.129	12.0172	86.7	77.4	83.6	79.9	84.7	107.8	125.9	114.8	124	115.3
A2AMZ4	NADH dehydrogenase [ubiquinone] 1 alpha subcomplex assembly factor 8 OS=Mus musculus OX=10090 GN=Ndufaf8 PE=1 SV=1	16.118	50	107.5	130.7	121.6	118.7	108.6	89.6	90.2	74.2	81.3	77.7
Q3UBX0	Transmembrane protein 109 OS=Mus musculus OX=10090 GN=Tmem109 PE=1 SV=2	16.116	12.3457	162.8	89.3	99.4	89.2	106.4	75.7	95	88.2	101.7	92.4
P62862	40S ribosomal protein S30 OS=Mus musculus OX=10090 GN=Fau PE=1 SV=1	16.112	32.2034	107.9	91.7	103.4	116.3	80.6	112.5	92.8	93	95.6	106.1
Q9ERB0	Synaptosomal-associated protein 29 OS=Mus musculus OX=10090 GN=Snap29 PE=1 SV=1	16.105	11.1538	114.6	98.4	94.4	109.4	94.1	93.9	94.2	97.4	98.9	104.8
Q9CWY8	Ribonuclease H2 subunit A OS=Mus musculus OX=10090 GN=Rnaseh2a PE=1 SV=2	15.989	9.96678	87.9	106.9	94.9	96.8	91.9	109.4	108.5	98.5	100.6	104.7
Q6ZPT1	Kelch-like protein 9 OS=Mus musculus OX=10090 GN=Klhl9 PE=2 SV=2	15.975	8.42788	98.5	96	101.4	100	102.8	97.9	88.7	109	106.8	98.9
Q8K1C0	Protein angel homolog 2 OS=Mus musculus OX=10090 GN=Angel2 PE=1 SV=1	15.965	8.45588	99.4	108.2	109	108.3	107.2	91.1	99.9	89	92.5	95.4
Q64277	ADP-ribosyl cyclase/cyclic ADP-ribose hydrolase 2 OS=Mus musculus OX=10090 GN=Bst1 PE=1 SV=1	15.963	9.6463	76.7	107.6	77.4	75.6	83.9	140.6	115.2	152.5	82.7	87.8
B2RY04	Dedicator of cytokinesis protein 5 OS=Mus musculus OX=10090 GN=Dock5 PE=1 SV=2	15.935	2.62313	81.9	84.6	80.1	93.6	93.3	100.6	97.1	120	129.9	118.9
O35316	Sodium- and chloride-dependent taurine transporter OS=Mus musculus OX=10090 GN=Slc6a6 PE=1 SV=2	15.914	5.63607	103.5	94.7	135.1	90.2	127.6	79.3	96.3	86.3	95.9	91.2
Q91X97	Neurocalcin-delta OS=Mus musculus OX=10090 GN=Ncald PE=1 SV=4	15.872	27.4611	106.6	113.8	116	104	102	98.3	89.7	83	94.4	92.1
Q6PD19	Armadillo-like helical domain-containing protein 3 OS=Mus musculus OX=10090 GN=Armh3 PE=1 SV=2	15.871	8.12772	101.7	95.7	98.1	96.7	87.5	99.8	78.8	117.9	112.5	111.3
Q8BTY8	Sec1 family domain-containing protein 2 OS=Mus musculus OX=10090 GN=Scfd2 PE=1 SV=1	15.812	6.72515	97.1	86.6	90	92.3	93.8	103.3	86.9	115.9	112	122.1
O70585	Dystrobrevin beta OS=Mus musculus OX=10090 GN=Dtnb PE=1 SV=3	15.791	4.55235	97.9	80	78.9	92.6	89.6	97.5	101.6	106.7	124	131.2
Q7TSH6	SR-related and CTD-associated factor 4 OS=Mus musculus OX=10090 GN=Scaf4 PE=1 SV=1	15.719	4.31107	77.1	88.4	76.3	89.5	74.7	131.3	134	125.8	91.1	111.8
Q8VDR9	Dedicator of cytokinesis protein 6 OS=Mus musculus OX=10090 GN=Dock6 PE=1 SV=4	15.718	3.26923	91.4	84.4	96.3	103.2	91.8	102.1	95.5	107	113.2	115.2
Q9CRB8	Mitochondrial fission process protein 1 OS=Mus musculus OX=10090 GN=Mtfp1 PE=1 SV=1	15.625	13.8554	111.7	104.5	109	103.1	124.7	86.4	85.9	88.1	97.6	89
Q80XR2	Calcium-transporting ATPase type 2C member 1 OS=Mus musculus OX=10090 GN=Atp2c1 PE=1 SV=2	15.625	6.20915	114.2	97.1	111.8	83.8	124.2	74.5	86	97.2	111.2	100
Q811U4	Mitofusin-1 OS=Mus musculus OX=10090 GN=Mfn1 PE=1 SV=3	15.607	4.99325	92.7	77.7	86.1	111.1	111.2	91.2	112.2	97.9	119.9	100.1
Q8BQZ5	Cleavage and polyadenylation specificity factor subunit 4 OS=Mus musculus OX=10090 GN=Cpsf4 PE=2 SV=1	15.527	18.9573	88.9	93.1	94	97.2	92.6	111.8	100.6	101.5	109.4	110.8
Q8K212	Phosphofurin acidic cluster sorting protein 1 OS=Mus musculus OX=10090 GN=Pacs1 PE=1 SV=2	15.476	5.7232	104.9	105.1	101.7	93.8	105.7	92.2	103.3	93	106.4	93.9
Q9EP82	tRNA (guanine-N(7)-)-methyltransferase non-catalytic subunit WDR4 OS=Mus musculus OX=10090 GN=Wdr4 PE=1 SV=2	15.454	9.68523	97.1	97.9	93.2	94.8	97.4	105.7	102	102.6	96.5	112.8
Q9R155	Pendrin OS=Mus musculus OX=10090 GN=Slc26a4 PE=1 SV=1	15.355	4.48718	105.6	90.8	104.1	80.9	117.6	88	95.5	98.8	111.5	107.2
O88668	Protein CREG1 OS=Mus musculus OX=10090 GN=Creg1 PE=1 SV=1	15.348	18.6364	78.9	83.8	95.6	94.2	91.1	124.4	114.8	109.6	107	100.6
Q7TPS5	C2 domain-containing protein 5 OS=Mus musculus OX=10090 GN=C2cd5 PE=1 SV=2	15.325	4.03543	79.7	84.6	91.1	83.3	91.6	107.3	99.8	121.8	114.2	126.7
Q80U78	Pumilio homolog 1 OS=Mus musculus OX=10090 GN=Pum1 PE=1 SV=2	15.314	2.69134	100	89.8	98.5	87.9	92.8	94.5	92	117.3	107.4	119.9
Q8BKF1	DNA-directed RNA polymerase, mitochondrial OS=Mus musculus OX=10090 GN=Polrmt PE=1 SV=1	15.242	3.56255	108.7	92.9	110.2	98.2	110.9	88.1	89.3	98.2	106	97.5
P98086	Complement C1q subcomponent subunit A OS=Mus musculus OX=10090 GN=C1qa PE=1 SV=2	15.233	15.9184	85	115.4	98.6	108	93.5	126.6	86.1	103.7	79.5	103.7
Q6NZM9	Histone deacetylase 4 OS=Mus musculus OX=10090 GN=Hdac4 PE=1 SV=1	15.219	5.76208	96.4	94.8	92	105.1	95	110.4	98.4	100.6	102.4	104.9
P06683	Complement component C9 OS=Mus musculus OX=10090 GN=C9 PE=1 SV=2	15.191	6.38686	87.9	113.8	79.8	108.9	105.5	116.1	115.7	81.2	83.1	108
Q99ME2	WD repeat-containing protein 6 OS=Mus musculus OX=10090 GN=Wdr6 PE=1 SV=1	15.118	4.35556	92.9	85.1	95.7	88.5	113.1	95.5	94.5	115.4	111	108.3
Q9CQT5	Proteasome maturation protein OS=Mus musculus OX=10090 GN=Pomp PE=1 SV=1	15.116	25.5319	83.9	95	94.8	89.2	85.7	111.2	110	102.5	112.6	115
Q922L6	Negative elongation factor D OS=Mus musculus OX=10090 GN=Nelfcd PE=1 SV=2	15.113	8.12183	99.2	80.2	96.3	83.2	101	90.5	98.7	105.3	133.5	112.1
Q8R550	SH3 domain-containing kinase-binding protein 1 OS=Mus musculus OX=10090 GN=Sh3kbp1 PE=1 SV=1	15.088	5.21862	106	102.9	98	97.8	102.6	99.5	99.6	97.4	101.5	94.6
P63254	Cysteine-rich protein 1 OS=Mus musculus OX=10090 GN=Crip1 PE=1 SV=2	15.037	67.5325	78.8	97.2	91.8	109.4	84.9	136.5	103.1	108	90.7	99.7
Q922G2	Protein FAM76A OS=Mus musculus OX=10090 GN=Fam76a PE=2 SV=1	15.036	13.355	88.5	91.3	89.5	108.5	90.2	115.8	98.9	108.6	101	107.7
Q80XC2	tRNA (adenine(58)-N(1))-methyltransferase catalytic subunit TRMT61A OS=Mus musculus OX=10090 GN=Trmt61a PE=1 SV=1	14.951	12.069	90.2	90.4	90.4	104.4	98.8	109.1	98.7	104.3	109.1	104.7
Q8VC70	RNA-binding motif, single-stranded-interacting protein 2 OS=Mus musculus OX=10090 GN=Rbms2 PE=1 SV=1	14.932	9.39948	78.5	90.3	80.8	87.6	82.4	122.1	118.1	116	113.3	110.8
E9Q3C1	C2 domain-containing protein 2 OS=Mus musculus OX=10090 GN=C2cd2 PE=1 SV=1	14.907	5.17241	110.1	80.6	100.7	103.7	97.7	100	107.6	86.8	112.9	99.9
O89051	Integral membrane protein 2B OS=Mus musculus OX=10090 GN=Itm2b PE=1 SV=1	14.853	10.5263	101.1	101.6	103.3	97.5	101.2	94.1	93.1	108.3	97.8	101.9
O35231	Kinesin-like protein KIFC3 OS=Mus musculus OX=10090 GN=Kifc3 PE=1 SV=4	14.848	5.33981	86.2	90.6	99.7	99.7	97.5	107.5	103	103.1	113.7	99
Q8CH02	SURP and G-patch domain-containing protein 1 OS=Mus musculus OX=10090 GN=Sugp1 PE=1 SV=1	14.766	7.15397	82.5	97.1	82.3	96.6	83.5	129.9	101.9	108.3	107.5	110.4
Q6GQS1	Calcium-binding mitochondrial carrier protein SCaMC-3 OS=Mus musculus OX=10090 GN=Slc25a23 PE=1 SV=1	14.667	11.5632	107.8	100.5	108.5	100.6	127.4	83.9	98.2	85.5	98.4	89.3
Q9R0I7	YLP motif-containing protein 1 OS=Mus musculus OX=10090 GN=Ylpm1 PE=2 SV=2	14.615	2.52525	89.6	102.1	93.4	105.2	93.3	111.1	102.2	103.7	96.7	102.7
Q62009	Periostin OS=Mus musculus OX=10090 GN=Postn PE=1 SV=2	14.523	4.65394	92.2	86.6	82.4	98.1	103	107.7	103.8	102.8	107	116.6
P60898	DNA-directed RNA polymerase II subunit RPB9 OS=Mus musculus OX=10090 GN=Polr2i PE=1 SV=1	14.503	25.6	100.6	87	74.7	103.5	76.9	124.4	98.9	119.5	84.4	130.2
Q99P31	Hsp70-binding protein 1 OS=Mus musculus OX=10090 GN=Hspbp1 PE=1 SV=1	14.501	11.2045	123.8	97.9	113.4	92.3	110.6	80.1	101.8	81.7	104	94.4
O88576	Sodium-dependent neutral amino acid transporter B(0)AT3 OS=Mus musculus OX=10090 GN=Slc6a18 PE=1 SV=1	14.447	5.20325	101.6	108.6	118	84.4	134.8	68.2	84.2	95.5	104.9	99.9
Q6PDI6	Ubiquitin carboxyl-terminal hydrolase MINDY-2 OS=Mus musculus OX=10090 GN=Mindy2 PE=1 SV=1	14.388	5.99002	104.5	91.2	104.1	95.6	102.7	89.1	99.2	103.2	106.8	103.6
Q61462	Cytochrome b-245 light chain OS=Mus musculus OX=10090 GN=Cyba PE=1 SV=3	14.363	27.6042	109.3	79.1	90.9	76.5	100.4	94	121.9	101.1	123.5	103.3
Q8CI71	Syndetin OS=Mus musculus OX=10090 GN=Vps50 PE=1 SV=2	14.358	4.97925	63	82.3	59	58.5	69.9	119.8	141.9	134.5	141.5	129.6
B8JK39	Integrin alpha-9 OS=Mus musculus OX=10090 GN=Itga9 PE=1 SV=1	14.35	3.57143	98.5	85.7	80	81.2	88.9	109.2	112	118.8	120.6	105.1
E9Q7D5	Rho guanine nucleotide exchange factor 5 OS=Mus musculus OX=10090 GN=Arhgef5 PE=1 SV=1	14.238	2.27704	96.4	82.7	91.6	87.3	100.2	86.4	96.3	108	132.3	118.9
Q9WVD4	H(+)/Cl(-) exchange transporter 5 OS=Mus musculus OX=10090 GN=Clcn5 PE=1 SV=2	14.227	5.51471	118.3	96.5	124.8	94.5	109.6	77.7	99.4	86.6	102.6	89.9
Q5NCX5	Neuralized-like protein 4 OS=Mus musculus OX=10090 GN=Neurl4 PE=1 SV=1	14.21	1.91939	107.3	99.7	103.4	104.3	102.3	89.2	92.7	96.3	102.1	102.8
Q8BYH7	TBC1 domain family member 17 OS=Mus musculus OX=10090 GN=Tbc1d17 PE=1 SV=2	14.104	5.27132	88.7	83.8	87.4	80.4	115.4	89.3	100.7	115.5	126	112.9
Q9D8T0	Protein FAM3A OS=Mus musculus OX=10090 GN=Fam3a PE=2 SV=1	14.1	12.6087	90.4	88.5	88	91.1	95.7	104.8	102.4	113	114.2	112
Q80Y61	Brain-specific angiogenesis inhibitor 1-associated protein 2-like protein 2 OS=Mus musculus OX=10090 GN=Baiap2l2 PE=1 SV=1	14.092	8.62069	163.4	107	159.5	96.9	93.4	71.5	86.3	66.4	80	75.7
Q80TR8	DDB1- and CUL4-associated factor 1 OS=Mus musculus OX=10090 GN=Dcaf1 PE=1 SV=4	14.077	2.45684	82.8	86.7	92.8	95.1	94.6	101.4	99.6	117.1	104	125.9
A2A690	Protein TANC2 OS=Mus musculus OX=10090 GN=Tanc2 PE=1 SV=1	14.064	2.60782	83.8	87.7	88.3	92.4	101.9	103.7	100.8	113.7	114.6	113.1
Q8BRH0	Protein O-mannosyl-transferase TMTC3 OS=Mus musculus OX=10090 GN=Tmtc3 PE=1 SV=2	14.063	4.45652	82.8	86.2	85.3	86.5	102.6	93.4	90.1	127.1	121.5	124.4
O70228	Probable phospholipid-transporting ATPase IIA OS=Mus musculus OX=10090 GN=Atp9a PE=1 SV=3	14.03	4.01146	103.6	78	102.2	88.4	100	98.4	80.7	111.3	129.6	107.7
Q62432	Mothers against decapentaplegic homolog 2 OS=Mus musculus OX=10090 GN=Smad2 PE=1 SV=2	13.982	11.1349	87	89.5	95.8	93.4	91.8	105.4	99.2	110.2	116.4	111.4
Q9WTU6	Mitogen-activated protein kinase 9 OS=Mus musculus OX=10090 GN=Mapk9 PE=1 SV=2	13.976	13.0024	96.8	99.8	100.8	93.2	108.3	93.5	90.7	105.3	106.8	105
Q6WKZ8	E3 ubiquitin-protein ligase UBR2 OS=Mus musculus OX=10090 GN=Ubr2 PE=1 SV=2	13.95	2.16524	81.3	80.3	88.8	77.7	88.7	96.7	109.5	125.5	128.7	122.8
B1AVD1	Xaa-Pro aminopeptidase 2 OS=Mus musculus OX=10090 GN=Xpnpep2 PE=1 SV=1	13.922	6.52819	118.1	116.8	126.3	110.4	119.1	75.9	85	76.3	89.4	82.7
Q99KU1	Dehydrodolichyl diphosphate synthase complex subunit Dhdds OS=Mus musculus OX=10090 GN=Dhdds PE=2 SV=1	13.904	8.70871	141.9	98.5	98.6	101	110.8	67.4	78.6	94	108.6	100.7
Q8BPM2	Mitogen-activated protein kinase kinase kinase kinase 5 OS=Mus musculus OX=10090 GN=Map4k5 PE=1 SV=2	13.847	4.2503	82.9	91	97.7	105.6	91.7	111.7	96.8	114.1	102.6	105.8
Q99MK8	Beta-adrenergic receptor kinase 1 OS=Mus musculus OX=10090 GN=Grk2 PE=1 SV=2	13.846	5.22496	90.5	86.8	91	84.4	94.3	100.1	93.3	115.5	126	118
Q9QZU9	Ubiquitin/ISG15-conjugating enzyme E2 L6 OS=Mus musculus OX=10090 GN=Ube2l6 PE=1 SV=3	13.841	27.451	29.2	47.6	33.1	36.8	33.8	150.9	172.1	157.3	166.2	173
Q5SSL4	Active breakpoint cluster region-related protein OS=Mus musculus OX=10090 GN=Abr PE=1 SV=1	13.837	4.07451	89.2	94.3	86.9	94.4	104.4	106.8	94.3	103.8	115.7	110.2
Q8VC97	Beta-ureidopropionase OS=Mus musculus OX=10090 GN=Upb1 PE=1 SV=1	13.836	8.39695	74	72.7	80.9	91.2	73.1	137.1	122.1	120.8	117.5	110.6
Q61576	Peptidyl-prolyl cis-trans isomerase FKBP10 OS=Mus musculus OX=10090 GN=Fkbp10 PE=1 SV=2	13.831	5.33563	83.1	90.3	84.1	96	82.4	117	96.2	127.1	111.6	112.2
Q9Z2Y3	Homer protein homolog 1 OS=Mus musculus OX=10090 GN=Homer1 PE=1 SV=2	13.809	9.28962	97.4	97.1	97	103.1	95.5	103.8	94.9	105.1	103.3	102.8
Q8K2D3	Enhancer of mRNA-decapping protein 3 OS=Mus musculus OX=10090 GN=Edc3 PE=1 SV=1	13.637	8.07087	84.5	95.3	91.6	97.2	91.7	115.3	97.8	105.5	108.4	112.7
Q8CC21	Tetratricopeptide repeat protein 19, mitochondrial OS=Mus musculus OX=10090 GN=Ttc19 PE=1 SV=1	13.601	10.137	109.1	120.3	106.5	112.3	104.2	93.1	87.6	85.8	88.9	92.3
Q80WR5	UPF0688 protein C1orf174 homolog OS=Mus musculus OX=10090 PE=1 SV=1	13.518	18.6957	112.6	95.1	104.6	100.5	91.3	99.1	100.2	95.6	96.2	104.7
Q0GNC1	Inverted formin-2 OS=Mus musculus OX=10090 GN=Inf2 PE=1 SV=1	13.489	2.74941	90.5	82.5	81.1	104	83.4	116	98.6	114.1	114	115.7
Q8K182	Complement component C8 alpha chain OS=Mus musculus OX=10090 GN=C8a PE=1 SV=1	13.38	6.30324	73.8	114.4	78.2	102.6	87.7	145.7	117.4	91.8	78.4	110
Q3UQA7	Selenoprotein H OS=Mus musculus OX=10090 GN=Selenoh PE=1 SV=2	13.253	26.7241	78.4	104.3	103.8	110.1	92.9	117.8	106.8	97.5	86.1	102.3
Q9CQJ2	PIH1 domain-containing protein 1 OS=Mus musculus OX=10090 GN=Pih1d1 PE=1 SV=1	13.251	17.2414	79.7	86.7	90.3	88.6	101.6	98.4	118	105.3	117.4	114
Q9D2E2	Target of EGR1 protein 1 OS=Mus musculus OX=10090 GN=Toe1 PE=1 SV=1	13.223	8.61057	80.2	92.7	107.1	85	103.4	107.6	150.1	86.6	83.4	103.9
Q02858	Angiopoietin-1 receptor OS=Mus musculus OX=10090 GN=Tek PE=1 SV=2	13.162	4.3672	85.9	85.5	79.7	90.9	102.3	107.6	92.3	130.8	87.4	137.7
Q9CY57	Chromatin target of PRMT1 protein OS=Mus musculus OX=10090 GN=Chtop PE=1 SV=2	13.081	14.0562	86.6	104.8	103.8	95.2	78.2	111.7	105.6	103.2	98.8	112
Q8K1R7	Serine/threonine-protein kinase Nek9 OS=Mus musculus OX=10090 GN=Nek9 PE=1 SV=2	13.072	3.25203	94.7	77	99.1	99.6	109.4	87.3	93	118.4	109	112.5
Q80UP5	Ankyrin repeat domain-containing protein 13A OS=Mus musculus OX=10090 GN=Ankrd13a PE=1 SV=2	13.047	6.12245	79.3	85.4	78.4	98.2	83.9	108.5	87.6	138.3	110.8	129.7
Q8BGU5	Cyclin-Y OS=Mus musculus OX=10090 GN=Ccny PE=1 SV=1	13.039	12.0235	60.1	69.9	51.5	66.8	166.4	100.9	138.1	104	130.6	111.6
Q8BHJ9	Pre-mRNA-splicing factor SLU7 OS=Mus musculus OX=10090 GN=Slu7 PE=1 SV=1	13.028	3.93162	96.2	91.4	106.4	106.4	88.7	105	100.4	98.9	95.2	111.2
Q9DCD5	Tight junction-associated protein 1 OS=Mus musculus OX=10090 GN=Tjap1 PE=1 SV=2	13.027	4.91803	98.7	99.4	103.2	90.5	97.1	111.7	99.4	99.8	101	99.1
Q922Q9	Chitinase domain-containing protein 1 OS=Mus musculus OX=10090 GN=Chid1 PE=1 SV=1	12.99	11.4504	111.1	98.6	98.5	105	103	91.3	85.2	104.5	104	98.8
Q9JI90	E3 ubiquitin-protein ligase RNF14 OS=Mus musculus OX=10090 GN=Rnf14 PE=1 SV=2	12.988	10.5155	95.1	94.7	88.1	105.9	101.5	97.7	88.7	110.9	107.7	109.8
E0CYR6	N-acetyltransferase family 8 member 7 OS=Mus musculus OX=10090 GN=Nat8f7 PE=1 SV=1	12.875	9.69163	241.4	81.2	112.9	121.2	135.3	41.7	51.1	67.3	77.5	70.4
Q9D0I6	WD repeat, SAM and U-box domain-containing protein 1 OS=Mus musculus OX=10090 GN=Wdsub1 PE=2 SV=1	12.83	8.43882	114.7	94.3	112.4	94.3	106.4	84.8	99	92.6	106.9	94.6
P06537	Glucocorticoid receptor OS=Mus musculus OX=10090 GN=Nr3c1 PE=1 SV=1	12.829	5.36398	102.6	95.5	94.1	120.3	87	89	106	111	93.1	101.2
Q9R0B9	Procollagen-lysine,2-oxoglutarate 5-dioxygenase 2 OS=Mus musculus OX=10090 GN=Plod2 PE=1 SV=2	12.772	6.24152	92.2	82.1	85	92.7	91.6	122.3	109.8	108.4	109.9	106
Q8C0C0	Zinc fingers and homeoboxes protein 2 OS=Mus musculus OX=10090 GN=Zhx2 PE=1 SV=1	12.75	2.99043	73.8	87.4	73.5	88.7	135.9	102.6	136.5	93.5	110.1	98
O70348	Decapping and exoribonuclease protein OS=Mus musculus OX=10090 GN=Dxo PE=1 SV=2	12.732	11.0831	88.6	84.2	95.8	93.6	96.3	100.4	93.1	105.7	114.8	127.4
P62915	Transcription initiation factor IIB OS=Mus musculus OX=10090 GN=Gtf2b PE=1 SV=1	12.723	11.0759	81	83.2	91.9	98.1	87.9	112.8	100.8	116.9	110	117.4
Q8R1A4	Dedicator of cytokinesis protein 7 OS=Mus musculus OX=10090 GN=Dock7 PE=1 SV=3	12.657	1.97183	87.4	86.4	92.8	79.6	100.7	96.2	107.5	115.1	124.8	109.4
Q99MP8	BRCA1-associated protein OS=Mus musculus OX=10090 GN=Brap PE=1 SV=1	12.657	7.78342	103.6	93.1	97.7	107.9	110.5	98.9	96.2	97	97.7	97.3
Q3KNM2	E3 ubiquitin-protein ligase MARCHF5 OS=Mus musculus OX=10090 GN=Marchf5 PE=1 SV=1	12.652	16.5468	98.5	84.4	101	94.7	94.3	92.9	80.4	102.4	114.5	136.8
Q91W61	F-box/LRR-repeat protein 15 OS=Mus musculus OX=10090 GN=Fbxl15 PE=1 SV=2	12.642	12.3333	102.6	95.4	101.7	101.7	101.3	96.8	85.6	103.5	102.8	108.5
O54804	Choline kinase alpha OS=Mus musculus OX=10090 GN=Chka PE=1 SV=3	12.625	6.40177	100.5	92.1	95	89.4	88.5	91.1	104.9	110.8	118.9	108.8
P43135	COUP transcription factor 2 OS=Mus musculus OX=10090 GN=Nr2f2 PE=1 SV=2	12.574	9.90338	81.5	110.1	89.9	104.9	94.8	112.6	92.1	121.7	94.4	98.1
P70202	Latexin OS=Mus musculus OX=10090 GN=Lxn PE=1 SV=2	12.561	12.1622	83.5	97.5	88.1	96.4	86.7	115.3	111.2	109.9	103.8	107.6
Q8K211	High affinity copper uptake protein 1 OS=Mus musculus OX=10090 GN=Slc31a1 PE=2 SV=1	12.537	13.2653	137.6	93.3	110.5	78.4	113.2	88.4	91.9	88.9	112.2	85.6
Q8K039	Uncharacterized protein KIAA1143 homolog OS=Mus musculus OX=10090 PE=1 SV=1	12.507	19.3548	105.6	103.9	103.2	93.2	95.8	105.5	116.2	88.5	94.9	93.2
Q62313	Trans-Golgi network integral membrane protein 1 OS=Mus musculus OX=10090 GN=Tgoln1 PE=1 SV=1	12.432	10.4816	84.4	86.5	79.1	89.8	84.6	99.2	113.3	108	126.7	128.5
P16330	2',3'-cyclic-nucleotide 3'-phosphodiesterase OS=Mus musculus OX=10090 GN=Cnp PE=1 SV=3	12.416	8.33333	84.6	88.3	102.1	85.3	92.1	101.8	100.4	105.9	125.1	114.3
Q9DBX6	Cytochrome P450 2S1 OS=Mus musculus OX=10090 GN=Cyp2s1 PE=1 SV=1	12.405	6.18762	98.1	92	113.1	73.9	113.9	75.9	94.5	100.1	127.7	110.7
Q5SRY7	F-box/WD repeat-containing protein 11 OS=Mus musculus OX=10090 GN=Fbxw11 PE=1 SV=1	12.399	6.27306	116.3	83.2	114.8	101	95.5	96	76.3	97.9	103.7	115.3
P81069	GA-binding protein subunit beta-2 OS=Mus musculus OX=10090 GN=Gabpb2 PE=1 SV=2	12.374	6.76329	111	87.9	96	133	83.7	117.3	94.4	89.1	88.7	98.8
Q2TBE6	Phosphatidylinositol 4-kinase type 2-alpha OS=Mus musculus OX=10090 GN=Pi4k2a PE=1 SV=1	12.367	8.5595	94.5	83.4	98.3	85.9	98.3	104.2	92.8	114.1	120.8	107.7
Q6DVA0	LEM domain-containing protein 2 OS=Mus musculus OX=10090 GN=Lemd2 PE=1 SV=1	12.36	7.2407	95.6	92.8	101.9	93.1	101.4	97.6	91.9	103.4	112.7	109.6
Q8K2A1	PTB domain-containing engulfment adapter protein 1 OS=Mus musculus OX=10090 GN=Gulp1 PE=1 SV=1	12.337	9.53947	87.3	98.8	95.9	102.4	99.3	114.8	97.2	112.1	81.4	110.8
Q9CR67	Transmembrane protein 33 OS=Mus musculus OX=10090 GN=Tmem33 PE=1 SV=1	12.327	11.336	115	93.9	119.2	84.8	122.5	70.1	84.2	91.2	121.8	97.4
Q80UW2	F-box only protein 2 OS=Mus musculus OX=10090 GN=Fbxo2 PE=1 SV=1	12.317	13.8047	82.8	84.7	108.1	107.6	87	111.4	100.9	114.8	104.4	98.2
Q9CYI0	Protein Njmu-R1 OS=Mus musculus OX=10090 PE=1 SV=2	12.308	6.61578	101.2	95	99	89.7	105.9	90.5	95.3	107.4	113.2	103
Q91W36	Ubiquitin carboxyl-terminal hydrolase 3 OS=Mus musculus OX=10090 GN=Usp3 PE=2 SV=1	12.298	7.11538	83.6	80.2	82.8	96.4	91.9	109.9	104.4	108.9	119.4	122.5
Q61337	Bcl2-associated agonist of cell death OS=Mus musculus OX=10090 GN=Bad PE=1 SV=1	12.262	13.7255	112.3	108.6	115.4	114.8	97.8	105.2	87.7	87.2	82.9	88.2
Q8VC42	Regulator of MON1-CCZ1 complex OS=Mus musculus OX=10090 GN=Rmc1 PE=2 SV=1	12.251	5.63166	93.3	87.3	86.7	80.8	99	91.2	96.9	119.5	133.9	111.4
Q9QX15	Calcium-activated chloride channel regulator 3A-1 OS=Mus musculus OX=10090 GN=Clca3a1 PE=1 SV=1	12.242	3.54767	82	97.3	94	108.8	92.8	115.7	99	101.9	90.6	117.8
Q9EST4	Proteasome assembly chaperone 2 OS=Mus musculus OX=10090 GN=Psmg2 PE=1 SV=1	12.205	12.8788	120.2	96.9	95.4	87.1	98.8	86.1	97.8	99.9	112.4	105.3
Q920I9	WD repeat-containing protein 7 OS=Mus musculus OX=10090 GN=Wdr7 PE=1 SV=3	12.172	2.28341	92.5	85.5	89.3	89	99	103.5	100.6	110.2	117.8	112.7
O08579	Emerin OS=Mus musculus OX=10090 GN=Emd PE=1 SV=1	12.163	12.3552	95.3	98.2	104.3	94.6	93.9	95.3	110.6	96.4	101.3	110.2
P48281	Vitamin D3 receptor OS=Mus musculus OX=10090 GN=Vdr PE=1 SV=2	12.116	10.6635	94.8	82	106.5	100.8	102.2	105.3	88.9	115.1	101.3	103.1
Q6PAV2	Probable E3 ubiquitin-protein ligase HERC4 OS=Mus musculus OX=10090 GN=Herc4 PE=1 SV=2	12.034	3.68969	104.9	95.4	106.3	87.5	109.6	86.3	87.1	96.6	114	112.3
Q9QXA1	Cysteine and histidine-rich protein 1 OS=Mus musculus OX=10090 GN=Cyhr1 PE=1 SV=1	12.02	19.9357	91	88.3	98.1	100.5	95.5	109.3	91.5	109.2	107.9	108.7
Q9CPU2	NADH dehydrogenase [ubiquinone] 1 beta subcomplex subunit 2, mitochondrial OS=Mus musculus OX=10090 GN=Ndufb2 PE=1 SV=1	11.957	19.0476	114.8	99.8	103.5	100.4	118.4	86.5	96.6	90.7	97.1	92.1
Q80Y17	Lethal(2) giant larvae protein homolog 1 OS=Mus musculus OX=10090 GN=Llgl1 PE=1 SV=1	11.945	3.37838	91.2	85.1	97	103	92.9	99.7	101	109.1	109.2	111.7
Q9D9K3	Cell death regulator Aven OS=Mus musculus OX=10090 GN=Aven PE=1 SV=2	11.886	12.2807	94.1	95.6	95.3	102.9	96.7	93.9	85.1	118.8	92	125.5
Q8C8T8	Pre-rRNA-processing protein TSR2 homolog OS=Mus musculus OX=10090 GN=Tsr2 PE=1 SV=1	11.883	17.801	81	92.8	83.1	98.8	116.6	94.8	132.7	91.5	108.3	100.4
Q8CFI5	Probable proline--tRNA ligase, mitochondrial OS=Mus musculus OX=10090 GN=Pars2 PE=1 SV=2	11.871	7.57895	87.1	97.8	118.2	102	114.7	84.5	95.7	93.2	103	103.9
Q80SY4	E3 ubiquitin-protein ligase MIB1 OS=Mus musculus OX=10090 GN=Mib1 PE=1 SV=1	11.709	3.67793	95.6	92.5	100.2	102.5	100.7	96	102.4	100.1	101.7	108.4
Q5NBU8	XIAP-associated factor 1 OS=Mus musculus OX=10090 GN=Xaf1 PE=1 SV=3	11.659	13.5531	57.5	79.1	57.5	73.8	60.7	129.7	119.7	141.1	132.3	148.7
Q8K3G5	Inactive serine/threonine-protein kinase VRK3 OS=Mus musculus OX=10090 GN=Vrk3 PE=1 SV=2	11.658	7.28477	82.3	83.7	79.8	84.1	99.9	109.9	102.9	121.9	129.5	106
Q6ZQA0	Neurobeachin-like protein 2 OS=Mus musculus OX=10090 GN=Nbeal2 PE=1 SV=2	11.569	0.911743	94.4	86	90.4	88.4	97.4	95.3	99.4	106.4	126.7	115.5
Q9D2R8	28S ribosomal protein S33, mitochondrial OS=Mus musculus OX=10090 GN=Mrps33 PE=1 SV=1	11.492	33.9623	102.8	110.1	105.1	115.7	102.4	99	88	93.9	86.3	96.7
Q8BIF9	Zinc finger protein 787 OS=Mus musculus OX=10090 GN=Znf787 PE=2 SV=3	11.478	9.18635	89.3	91.8	110.3	126.7	97.5	97.9	104.7	92.9	84.8	104.1
A2AKQ0	UDP-glucuronic acid/UDP-N-acetylgalactosamine transporter OS=Mus musculus OX=10090 GN=Slc35d1 PE=2 SV=2	11.467	12.1127	103.2	83.3	103.6	87.3	109.8	86.1	93.9	100	126.2	106.6
Q8BJ56	Patatin-like phospholipase domain-containing protein 2 OS=Mus musculus OX=10090 GN=Pnpla2 PE=1 SV=1	11.457	8.64198	72.3	80.3	74.1	87.7	77.4	152.8	110.9	110.1	120.7	113.6
Q8BQP8	Rab11 family-interacting protein 4 OS=Mus musculus OX=10090 GN=Rab11fip4 PE=1 SV=1	11.414	5.19685	109.3	114	114.2	116.5	119.2	84.6	83.3	86.1	84.6	88.3
P51658	Estradiol 17-beta-dehydrogenase 2 OS=Mus musculus OX=10090 GN=Hsd17b2 PE=1 SV=2	11.406	7.34908	99.7	77.8	89.7	83.3	95.9	82.8	83.5	114.8	154.9	117.7
Q921Q3	Chitobiosyldiphosphodolichol beta-mannosyltransferase OS=Mus musculus OX=10090 GN=Alg1 PE=1 SV=3	11.362	7.46888	102.3	81.2	89.8	85.6	108.4	91	100.1	104.6	122.9	114.2
Q9DD06	Retinoic acid receptor responder protein 2 OS=Mus musculus OX=10090 GN=Rarres2 PE=1 SV=1	11.345	17.9012	96.6	86.8	107.7	99.5	101.8	91	100.7	95.4	111.9	108.5
Q80VP0	Tectonin beta-propeller repeat-containing protein 1 OS=Mus musculus OX=10090 GN=Tecpr1 PE=1 SV=1	11.344	2.65866	94.1	95.5	89.3	85.1	112.4	89.5	116.2	105.2	111.8	100.9
Q5F2E7	Nuclear fragile X mental retardation-interacting protein 2 OS=Mus musculus OX=10090 GN=Nufip2 PE=1 SV=1	11.31	4.91329	81.5	79.3	76.2	92.3	75	107.2	120.2	119.2	124.2	124.9
O35445	E3 ubiquitin-protein ligase RNF5 OS=Mus musculus OX=10090 GN=Rnf5 PE=1 SV=1	11.274	17.2222	104.7	91.1	98.9	91.6	109	91.2	91	102.6	112.7	107
Q6ZWQ7	Signal peptidase complex subunit 3 OS=Mus musculus OX=10090 GN=Spcs3 PE=1 SV=1	11.205	15.5556	112.5	105.4	102.3	100.8	113.3	86.2	87.8	94.8	101.1	95.9
Q9QZV9	NTF2-related export protein 1 OS=Mus musculus OX=10090 GN=Nxt1 PE=1 SV=2	11.172	31.4286	85.9	95.1	97.1	99.4	94.2	108.6	96.2	112.9	105.8	104.9
Q6ZQL4	WD repeat-containing protein 43 OS=Mus musculus OX=10090 GN=Wdr43 PE=1 SV=2	11.147	5.46529	86.1	94.6	90.3	92.4	89.9	107.7	105.1	105.7	117.1	111.1
Q6PGH2	Jupiter microtubule associated homolog 2 OS=Mus musculus OX=10090 GN=Jpt2 PE=1 SV=1	11.1	18.9474	82.1	70.7	78.2	76.8	67.7	121.3	122.2	130	95.6	155.4
P59808	SAM and SH3 domain-containing protein 1 OS=Mus musculus OX=10090 GN=Sash1 PE=1 SV=1	11.059	3.41463	135.9	79.5	71.2	132.1	72.7	121.7	90.7	91.1	97	108
Q61334	B-cell receptor-associated protein 29 OS=Mus musculus OX=10090 GN=Bcap29 PE=1 SV=1	11.028	9.16667	96	95.9	90.9	83.1	110.3	90.9	102.6	105.7	114.5	110.3
Q922S4	cGMP-dependent 3',5'-cyclic phosphodiesterase OS=Mus musculus OX=10090 GN=Pde2a PE=1 SV=4	10.988	3.72737	100	83.4	97.2	76.4	102.2	89.1	101	110	132.2	108.4
O88327	Alpha-catulin OS=Mus musculus OX=10090 GN=Ctnnal1 PE=1 SV=1	10.96	4.37756	92	96.6	103.5	92.8	109.3	96.7	104.7	104.2	107.6	92.6
Q9CR10	Oxidoreductase-like domain-containing protein 1 OS=Mus musculus OX=10090 GN=Oxld1 PE=1 SV=1	10.944	15.4229	106	117.7	111	116.8	114.4	90.9	86.5	84.1	88.1	84.5
Q8VHI3	GDP-fucose protein O-fucosyltransferase 2 OS=Mus musculus OX=10090 GN=Pofut2 PE=1 SV=1	10.846	6.99301	100.5	96.7	101.1	104.9	106.3	89.3	91.8	102.9	99.3	107
Q9Z0E0	Neurochondrin OS=Mus musculus OX=10090 GN=Ncdn PE=1 SV=1	10.839	4.2524	86.9	90.5	91.3	96.6	97.1	105.3	99	113.2	110	109.9
P97797	Tyrosine-protein phosphatase non-receptor type substrate 1 OS=Mus musculus OX=10090 GN=Sirpa PE=1 SV=2	10.819	5.45809	98.5	106	92.5	98.3	99.2	102.8	102.5	101.1	99.5	99.5
Q9EPL4	Protein-L-histidine N-pros-methyltransferase OS=Mus musculus OX=10090 GN=Mettl9 PE=1 SV=1	10.787	11.9497	87.9	93.5	91.8	89.6	97	88.8	99	112.8	128.2	111.4
Q7TPD0	Integrator complex subunit 3 OS=Mus musculus OX=10090 GN=Ints3 PE=1 SV=2	10.759	2.97791	84.9	80	88.9	74.7	107.3	87.3	96.1	118.3	137.1	125.5
Q80UY1	Carnosine N-methyltransferase OS=Mus musculus OX=10090 GN=Carnmt1 PE=1 SV=1	10.747	7.5	102.9	96.2	99.8	92.7	99.5	102.2	103.4	99.8	100.6	102.8
O54824	Pro-interleukin-16 OS=Mus musculus OX=10090 GN=Il16 PE=1 SV=3	10.738	2.118	75.4	97	80.7	106.8	88.4	127.9	102.5	117.8	98.7	104.9
Q9D173	Mitochondrial import receptor subunit TOM7 homolog OS=Mus musculus OX=10090 GN=Tomm7 PE=3 SV=1	10.729	54.5455	90.6	98.1	100.7	105.6	106.9	102.7	96.1	100.2	93.9	105.1
Q8CBY0	Glutamyl-tRNA(Gln) amidotransferase subunit C, mitochondrial OS=Mus musculus OX=10090 GN=Gatc PE=1 SV=1	10.725	18.0645	97.5	125.5	117.6	120.8	101.7	92.1	85	85.9	85.7	88.3
Q9D3A8	Carboxyl-terminal PDZ ligand of neuronal nitric oxide synthase protein OS=Mus musculus OX=10090 GN=Nos1ap PE=1 SV=3	10.506	6.56064	92	95.9	104.5	101.8	112.1	96.3	100.1	90.2	99.2	107.8
Q9JKY0	CCR4-NOT transcription complex subunit 9 OS=Mus musculus OX=10090 GN=Cnot9 PE=1 SV=1	10.501	9.0301	94.4	85.2	82.9	86	90.8	93.8	100.3	121.7	123.7	121.1
Q60596	DNA repair protein XRCC1 OS=Mus musculus OX=10090 GN=Xrcc1 PE=1 SV=2	10.471	5.38827	82.9	98.6	92.4	95.9	98.5	114.9	102.7	103.8	105.5	104.9
Q8VD66	(Lyso)-N-acylphosphatidylethanolamine lipase OS=Mus musculus OX=10090 GN=Abhd4 PE=1 SV=1	10.463	7.89474	73.5	69.8	84.3	67.2	79.2	119.5	124	119.2	134.6	128.7
Q3UUY6	Prominin-2 OS=Mus musculus OX=10090 GN=Prom2 PE=1 SV=1	10.444	3.47305	96.4	97.2	86.3	90.5	104.7	90.7	95.6	113.3	106.3	118.9
Q80U49	Centrosomal protein of 170 kDa protein B OS=Mus musculus OX=10090 GN=Cep170b PE=1 SV=2	10.398	1.84244	87.5	90.9	92.5	105.6	79.7	107.9	105	103.6	107	120.1
O88575	Sodium- and chloride-dependent transporter XTRP3B OS=Mus musculus OX=10090 GN=Slc6a20b PE=1 SV=3	10.384	4.09449	100.6	92.7	96.7	86.5	143	83.5	96.2	98.7	110.7	91.3
Q9CQN3	Mitochondrial import receptor subunit TOM6 homolog OS=Mus musculus OX=10090 GN=Tomm6 PE=3 SV=1	10.353	32.4324	87.5	101.9	86.7	114.3	101.5	110.7	87	104.2	101.8	104.4
Q91X05	Podocin OS=Mus musculus OX=10090 GN=Nphs2 PE=1 SV=2	10.332	7.27273	84.5	89.6	97.5	68.4	107.6	81.9	104.4	110.1	137.9	118.2
Q8C7Q4	RNA-binding protein 4 OS=Mus musculus OX=10090 GN=Rbm4 PE=1 SV=1	10.315	6.92521	93.6	103.5	109.3	106	100.9	109.7	97.3	93	91.9	94.7
Q61024	Asparagine synthetase [glutamine-hydrolyzing] OS=Mus musculus OX=10090 GN=Asns PE=1 SV=3	10.275	5.34759	62.2	55.6	44	53	54.8	104	146.4	144.9	168.7	166.4
Q9D289	Trafficking protein particle complex subunit 6B OS=Mus musculus OX=10090 GN=Trappc6b PE=1 SV=1	10.265	18.3544	97.6	98.6	96.8	92.3	104.4	99.4	101.1	102.6	101.4	105.8
Q9QYI5	DnaJ homolog subfamily B member 2 OS=Mus musculus OX=10090 GN=Dnajb2 PE=1 SV=3	10.256	8.95062	89.5	101.7	97.9	102.8	94.3	97.8	94	98.5	109.5	113.8
P70279	Surfeit locus protein 6 OS=Mus musculus OX=10090 GN=Surf6 PE=1 SV=1	10.221	9.85915	101.6	89	110.2	88.6	103.8	95.9	107.6	92.2	112	99.1
Q80UQ2	Ras association domain-containing protein 6 OS=Mus musculus OX=10090 GN=Rassf6 PE=1 SV=1	10.214	10.1983	101.4	96.4	102.6	109.7	85.9	105.4	87	106.3	103.9	101.3
Q9D6N1	Carbonic anhydrase 13 OS=Mus musculus OX=10090 GN=Ca13 PE=1 SV=1	10.15	10.687	78.1	84.2	77.7	84.5	79	116.9	111.9	116.9	119.6	131.1
P51949	CDK-activating kinase assembly factor MAT1 OS=Mus musculus OX=10090 GN=Mnat1 PE=1 SV=2	10.146	13.9159	83.8	118.9	94.4	117.1	89	109.7	105.1	94.9	89.3	97.8
Q9D6Z0	Alpha-ketoglutarate-dependent dioxygenase alkB homolog 7, mitochondrial OS=Mus musculus OX=10090 GN=Alkbh7 PE=1 SV=1	10.062	16.7421	93.3	107	109.3	104.4	98.8	99	87.2	99.4	100.6	101.1
P62254	Ubiquitin-conjugating enzyme E2 G1 OS=Mus musculus OX=10090 GN=Ube2g1 PE=1 SV=3	10.058	20	105.2	98	96	90	93.4	99.5	115.3	96.1	102.4	104.1
O88502	High affinity cAMP-specific and IBMX-insensitive 3',5'-cyclic phosphodiesterase 8A OS=Mus musculus OX=10090 GN=Pde8a PE=1 SV=1	10.052	5.10328	100.7	85.8	103.2	94	109.7	95.4	101.6	97.3	109.3	103
Q921V5	Alpha-1,6-mannosyl-glycoprotein 2-beta-N-acetylglucosaminyltransferase OS=Mus musculus OX=10090 GN=Mgat2 PE=1 SV=1	10.046	7.46606	92.3	84.3	91.3	105.3	96.6	102	88.9	122.6	107.3	109.4
Q8BP01	Vimentin-type intermediate filament-associated coiled-coil protein OS=Mus musculus OX=10090 GN=Vmac PE=1 SV=1	9.998	19.5402	67.8	87.8	76.4	104.9	78.8	134.5	98.9	127.8	108.5	114.5
Q8BUE4	Ferroptosis suppressor protein 1 OS=Mus musculus OX=10090 GN=Aifm2 PE=1 SV=1	9.985	7.7748	98.7	87.9	100.9	93.7	105.8	88.1	95.3	108.6	115.7	105.4
P47878	Insulin-like growth factor-binding protein 3 OS=Mus musculus OX=10090 GN=Igfbp3 PE=2 SV=2	9.969	9.93151	79.7	97.8	101.1	96.1	103.1	121	130.5	88.1	93.5	89.1
Q60680	Inhibitor of nuclear factor kappa-B kinase subunit alpha OS=Mus musculus OX=10090 GN=Chuk PE=1 SV=1	9.963	3.75839	95.2	81.8	103.2	89.7	109.3	84.9	87.2	107.4	128.2	113.1
Q9Z2D0	Myotubularin-related protein 9 OS=Mus musculus OX=10090 GN=Mtmr9 PE=1 SV=2	9.933	4.58716	99.9	81	98.4	85	100.5	88.8	98.5	111.3	122.4	114.2
Q9D7B1	tRNA-dihydrouridine(20) synthase [NAD(P)+]-like OS=Mus musculus OX=10090 GN=Dus2 PE=1 SV=1	9.924	6.69371	118.5	81.3	97.1	124.2	84.4	107.1	87.3	92.6	99.9	107.6
Q9JI44	DNA methyltransferase 1-associated protein 1 OS=Mus musculus OX=10090 GN=Dmap1 PE=1 SV=1	9.917	7.47863	84.5	91.1	91.6	96.7	92.7	113.5	109.1	110.5	100.7	109.6
Q923Z3	Protein MTO1 homolog, mitochondrial OS=Mus musculus OX=10090 GN=Mto1 PE=2 SV=1	9.897	4.18535	92.7	104.5	99	102.5	106.6	99	96.6	94.4	99.7	105
Q80Y56	Rabenosyn-5 OS=Mus musculus OX=10090 GN=Rbsn PE=1 SV=1	9.879	4.98084	88.8	91.8	93	95.8	85.2	123.1	96.6	110.3	102.3	113.1
Q9CXE7	Transmembrane emp24 domain-containing protein 5 OS=Mus musculus OX=10090 GN=Tmed5 PE=1 SV=1	9.873	7.86026	103.4	88.9	80	81.5	106.7	89.3	121.1	103	120.5	105.6
Q8BZ20	Protein mono-ADP-ribosyltransferase PARP12 OS=Mus musculus OX=10090 GN=Parp12 PE=1 SV=3	9.829	4.64135	60.1	97	66.1	62.7	63.5	109.9	118.8	137.3	148.4	136.1
Q9CQE2	Transmembrane protein 223 OS=Mus musculus OX=10090 GN=Tmem223 PE=2 SV=1	9.828	12.5628	132.2	94.7	127.9	78.5	121.2	72.5	86.1	94	109.1	83.7
Q8CHG7	Rap guanine nucleotide exchange factor 2 OS=Mus musculus OX=10090 GN=Rapgef2 PE=1 SV=2	9.805	2.80749	107.1	83.1	98.5	111.3	101.3	99	86.7	95.8	118.2	99.1
Q8JZS9	39S ribosomal protein L48, mitochondrial OS=Mus musculus OX=10090 GN=Mrpl48 PE=1 SV=1	9.76	13.2701	103.3	113.2	104	108.4	104.2	94.3	91.4	93.3	88.4	99.5
Q6X893	Choline transporter-like protein 1 OS=Mus musculus OX=10090 GN=Slc44a1 PE=1 SV=3	9.684	5.66616	95.1	95.2	89.9	77.9	111.2	91.1	106.3	111.5	118.8	103
E9Q5K9	YTH domain-containing protein 1 OS=Mus musculus OX=10090 GN=Ythdc1 PE=1 SV=2	9.558	3.39674	78.4	93.6	96.4	94.6	87.2	104.3	96.5	114.6	118.9	115.4
Q8K221	Arfaptin-2 OS=Mus musculus OX=10090 GN=Arfip2 PE=1 SV=2	9.492	10.5572	102.5	93	101.7	90.6	108.2	98.9	100.3	98.8	107.4	98.5
Q06180	Tyrosine-protein phosphatase non-receptor type 2 OS=Mus musculus OX=10090 GN=Ptpn2 PE=1 SV=2	9.492	6.65025	60.1	65.3	66.4	70.5	66.6	128.6	114.7	137	150.9	139.8
Q9D0C4	tRNA (guanine(37)-N1)-methyltransferase OS=Mus musculus OX=10090 GN=Trmt5 PE=1 SV=1	9.466	5.18962	92.6	88.7	98.3	95.4	97.5	104.9	100.7	105.4	109.5	107
Q9Z0S9	Prenylated Rab acceptor protein 1 OS=Mus musculus OX=10090 GN=Rabac1 PE=1 SV=1	9.444	16.7568	99.3	77.2	85	77.8	99.7	81.9	105.2	115	132.5	126.3
Q8VE09	Tetratricopeptide repeat protein 39C OS=Mus musculus OX=10090 GN=Ttc39c PE=1 SV=2	9.406	4.48276	112.1	81.1	94	81.6	115.8	87.3	93.2	111.3	114	109.7
P59481	VIP36-like protein OS=Mus musculus OX=10090 GN=Lman2l PE=1 SV=1	9.385	8.35735	147.6	93.4	102.2	84.8	116.5	75.6	79.8	95.8	110	94.5
Q61805	Lipopolysaccharide-binding protein OS=Mus musculus OX=10090 GN=Lbp PE=1 SV=2	9.38	7.48441	51	103.7	49.4	76	60.1	145.2	140.1	124.6	116.5	133.4
Q3TDK6	Protein rogdi homolog OS=Mus musculus OX=10090 GN=Rogdi PE=1 SV=2	9.378	14.9826	85.1	76.6	93.1	75.7	172	75.4	123.1	92.8	111.2	94.9
O70230	Zinc finger protein 143 OS=Mus musculus OX=10090 GN=Znf143 PE=1 SV=2	9.364	5.17241	96.7	87.6	92.1	127.3	83.3	119.8	118.6	90.1	89.4	95.2
P56528	ADP-ribosyl cyclase/cyclic ADP-ribose hydrolase 1 OS=Mus musculus OX=10090 GN=Cd38 PE=1 SV=2	9.293	8.55263	113.6	92.3	96.9	81	105.8	89.3	106.4	101.7	114.8	98.1
P28033	CCAAT/enhancer-binding protein beta OS=Mus musculus OX=10090 GN=Cebpb PE=1 SV=1	9.288	8.10811	44.3	65.2	54.9	62	49.4	167.2	177.6	117.2	129	133.2
O88477	Insulin-like growth factor 2 mRNA-binding protein 1 OS=Mus musculus OX=10090 GN=Igf2bp1 PE=1 SV=1	9.27	5.54593	100.9	98.9	111.1	107.1	126	94.1	112.7	87	89.7	72.6
Q8BL74	General transcription factor 3C polypeptide 2 OS=Mus musculus OX=10090 GN=Gtf3c2 PE=2 SV=2	9.263	3.85888	105.9	92.4	100.3	98.9	102.5	93.3	94.2	101.1	101.7	109.7
Q62276	Mediator of RNA polymerase II transcription subunit 22 OS=Mus musculus OX=10090 GN=Med22 PE=1 SV=2	9.241	12.5	76.3	87.9	83.3	105.3	82.8	120.5	101.9	122.5	101.4	118
P97376	Protein FRG1 OS=Mus musculus OX=10090 GN=Frg1 PE=1 SV=2	9.197	10.4651	84.6	99.4	97.1	92.8	95	113.6	113.4	99.4	104.4	100.3
O08692	Neutrophilic granule protein OS=Mus musculus OX=10090 GN=Ngp PE=1 SV=1	9.182	22.1557	28.1	77.2	47.5	68.6	45	204.8	197.8	133.2	59.3	138.4
Q8BGT6	MICAL-like protein 1 OS=Mus musculus OX=10090 GN=Micall1 PE=1 SV=3	9.12	3.21839	84.4	91.2	91	93.7	91.7	113.7	103.8	104.7	109.9	115.8
Q91Z49	UAP56-interacting factor OS=Mus musculus OX=10090 GN=Fyttd1 PE=1 SV=1	9.105	7.25552	91.8	98.4	102.2	101.4	88.2	97.9	99.3	104.9	103.9	112
Q80XU3	Nuclear ubiquitous casein and cyclin-dependent kinase substrate 1 OS=Mus musculus OX=10090 GN=Nucks1 PE=1 SV=1	9.014	13.6752	82.2	101.9	94.8	106.5	83.2	116.7	104.9	106.3	94.9	108.7
P60762	Mortality factor 4-like protein 1 OS=Mus musculus OX=10090 GN=Morf4l1 PE=1 SV=2	9.002	7.45856	80.3	91.6	80.6	94.3	82.3	123.1	107.9	114.8	111.3	113.8
Q06318	Uteroglobin OS=Mus musculus OX=10090 GN=Scgb1a1 PE=1 SV=1	8.963	19.7917	120	93.5	104.5	104.5	96.7	105.2	114.7	93.8	80.2	86.9
Q8R216	NAD-dependent protein lipoamidase sirtuin-4, mitochondrial OS=Mus musculus OX=10090 GN=Sirt4 PE=1 SV=3	8.96	10.5105	97.5	103.8	108.1	108.7	109.9	93	87.1	92	104.2	95.7
Q9QY36	N-alpha-acetyltransferase 10 OS=Mus musculus OX=10090 GN=Naa10 PE=1 SV=1	8.937	11.4894	104.4	95.5	104.9	105.2	89.4	102.7	96.7	98.5	100.2	102.5
Q9WV03	Protein FAM50A OS=Mus musculus OX=10090 GN=Fam50a PE=1 SV=1	8.891	8.55457	85.7	112.3	95.1	112.7	94.2	99.1	91.4	110.5	90	108.9
Q9D2R6	Cytochrome c oxidase assembly factor 3 homolog, mitochondrial OS=Mus musculus OX=10090 GN=Coa3 PE=1 SV=1	8.888	26.8519	106.2	109.4	112.2	106.8	107.5	93.9	83.3	92.6	96.3	91.7
P62700	Protein yippee-like 5 OS=Mus musculus OX=10090 GN=Ypel5 PE=1 SV=1	8.882	25.6198	90.4	86.2	93.6	92.2	80.3	117.4	104.7	115.4	103.5	116.2
P62743	AP-2 complex subunit sigma OS=Mus musculus OX=10090 GN=Ap2s1 PE=1 SV=1	8.839	16.9014	108.7	87.6	98.2	79.5	106	83.2	96.6	106.6	125.1	108.5
Q91VE6	MKI67 FHA domain-interacting nucleolar phosphoprotein OS=Mus musculus OX=10090 GN=Nifk PE=1 SV=1	8.835	6.62461	75.1	89.6	95.4	90.7	88.8	115.7	103.8	109.2	105.6	126
Q8C5L6	Inositol polyphosphate 5-phosphatase K OS=Mus musculus OX=10090 GN=Inpp5k PE=1 SV=2	8.758	6.19658	80.4	88.1	72.1	87.3	124.8	102.4	121.5	110.9	110.5	102
Q61730	Interleukin-1 receptor accessory protein OS=Mus musculus OX=10090 GN=Il1rap PE=1 SV=1	8.746	3.85965	84	133.2	89.1	106	94.3	109.3	107.9	87.8	81.2	107.2
Q60974	Nuclear receptor corepressor 1 OS=Mus musculus OX=10090 GN=Ncor1 PE=1 SV=1	8.739	0.978394	90.5	93.8	91	92.1	83.5	118.4	100.9	105.7	110.7	113.5
Q9ES89	Exostosin-like 2 OS=Mus musculus OX=10090 GN=Extl2 PE=1 SV=1	8.704	7.57576	93.4	98.9	105.7	105.3	100.5	103.6	94.7	103.8	95.6	98.4
Q8BHG9	CGG triplet repeat-binding protein 1 OS=Mus musculus OX=10090 GN=Cggbp1 PE=1 SV=1	8.693	15.5689	88.1	108.1	102.5	95.5	97.5	104.4	121.9	90.2	92.9	98.8
Q6PD21	SH2 domain-containing adapter protein B OS=Mus musculus OX=10090 GN=Shb PE=1 SV=2	8.668	5.16899	91.4	87.9	97.1	106.8	89.1	117.3	90.1	105.5	104.5	110.3
Q9D710	Thioredoxin-related transmembrane protein 2 OS=Mus musculus OX=10090 GN=Tmx2 PE=1 SV=1	8.58	7.79661	126.8	100.5	105.7	87.4	122.8	68.1	74.7	109.9	105.1	99
P62274	40S ribosomal protein S29 OS=Mus musculus OX=10090 GN=Rps29 PE=1 SV=2	8.558	26.7857	100.8	108.1	100.6	110.2	85.5	111.7	95.1	99.4	91.8	96.9
Q8BX80	Cytosolic endo-beta-N-acetylglucosaminidase OS=Mus musculus OX=10090 GN=Engase PE=1 SV=1	8.511	5.17711	102.7	93.9	96.3	105.4	103	93.7	99.8	105.9	92.2	107
Q9CWX4	Mitochondrial RNA pseudouridine synthase Rpusd4 OS=Mus musculus OX=10090 GN=Rpusd4 PE=2 SV=1	8.505	9.28382	100.5	95.6	118	112	103.8	94.2	86.9	96.5	93	99.7
P49718	DNA replication licensing factor MCM5 OS=Mus musculus OX=10090 GN=Mcm5 PE=1 SV=2	8.492	3.81471	104.4	94.5	88.3	95.7	80.2	121.2	97.9	109.4	106.7	101.7
O88792	Junctional adhesion molecule A OS=Mus musculus OX=10090 GN=F11r PE=1 SV=2	8.393	16	91.4	85.2	98.7	93.3	88.9	93.5	120.8	104.5	120.1	103.5
Q9ERI2	Ras-related protein Rab-27A OS=Mus musculus OX=10090 GN=Rab27a PE=1 SV=1	8.239	17.1946	109.8	91.5	116.2	92.3	119.7	84.4	91.5	93	106.8	94.9
Q8K3A9	7SK snRNA methylphosphate capping enzyme OS=Mus musculus OX=10090 GN=Mepce PE=1 SV=2	8.202	3.75375	93.4	87.6	99.3	104.6	91.3	107.3	110.8	100.7	99	106
Q91ZP3	Phosphatidate phosphatase LPIN1 OS=Mus musculus OX=10090 GN=Lpin1 PE=1 SV=1	8.183	4.22078	78.6	71	79.5	102	86.9	110.2	107.2	116.1	134.9	113.8
Q99KW9	T-cell immunomodulatory protein OS=Mus musculus OX=10090 GN=Itfg1 PE=1 SV=2	8.174	6.72131	101.5	89.2	96.7	92.9	104.3	98	94.7	106.3	104.6	111.7
Q5RJG7	D-ribitol-5-phosphate cytidylyltransferase OS=Mus musculus OX=10090 GN=Crppa PE=2 SV=1	8.048	6.93512	107.9	96.7	98.3	98.7	103.8	95.7	98.1	96.1	101.6	102.9
Q8BFR6	AN1-type zinc finger protein 1 OS=Mus musculus OX=10090 GN=Zfand1 PE=1 SV=1	8.036	11.9403	84.3	97.1	87.9	111.1	96.6	115.1	89.1	111.2	97.9	109.8
Q9QWH1	Polyhomeotic-like protein 2 OS=Mus musculus OX=10090 GN=Phc2 PE=1 SV=1	7.97	3.41176	84	94.2	91.8	98.5	88.6	111.4	104.9	107.5	106.2	113
Q9D7L8	Transmembrane and immunoglobulin domain-containing protein 1 OS=Mus musculus OX=10090 GN=Tmigd1 PE=2 SV=1	7.948	11.4943	126.9	98.3	139.6	82.9	130.6	77	87	80	96.2	81.5
P21180	Complement C2 OS=Mus musculus OX=10090 GN=C2 PE=1 SV=2	7.779	3.94737	85	93.4	69.1	87.1	90.6	116.7	122.5	102.7	115.3	117.5
P12710	Fatty acid-binding protein, liver OS=Mus musculus OX=10090 GN=Fabp1 PE=1 SV=2	7.766	22.8346	73.7	116.4	139.3	80.5	99.3	79.5	95.3	158.9	63.3	93.7
Q80YE7	Death-associated protein kinase 1 OS=Mus musculus OX=10090 GN=Dapk1 PE=1 SV=3	7.755	1.8724	97.9	78.5	100.1	86.7	90.1	97.3	96.1	101.9	131.9	119.4
Q80T21	ADAMTS-like protein 4 OS=Mus musculus OX=10090 GN=Adamtsl4 PE=2 SV=1	7.738	2.60618	69.8	86	82.2	103.8	74.5	122.9	98.6	136.1	99	127.2
Q80SZ7	Guanine nucleotide-binding protein G(I)/G(S)/G(O) subunit gamma-5 OS=Mus musculus OX=10090 GN=Gng5 PE=1 SV=2	7.569	33.8235	87.7	105.5	102.6	96.1	103.2	96.1	105.7	100	96.1	107
Q9R088	Thymidine kinase 2, mitochondrial OS=Mus musculus OX=10090 GN=Tk2 PE=1 SV=2	7.48	9.62963	103.6	92.8	101.8	96.6	109.7	87.5	97.3	101.9	109.2	99.4
Q3TVI8	Pre-B-cell leukemia transcription factor-interacting protein 1 OS=Mus musculus OX=10090 GN=Pbxip1 PE=1 SV=2	7.448	3.30124	79.9	90.2	89	88.8	86.6	111.7	95.9	125.3	107.1	125.4
Q8VDP2	STING ER exit protein OS=Mus musculus OX=10090 GN=Steep1 PE=1 SV=1	7.329	12.6126	102.8	99.6	108.8	104.8	95.7	93.2	89.2	103.4	97.2	105.2
Q8C4U3	Secreted frizzled-related protein 1 OS=Mus musculus OX=10090 GN=Sfrp1 PE=1 SV=3	7.325	10.828	120.8	129	125.8	123.9	116.6	74.2	70.1	71.8	73.5	94.2
Q8R2Y9	SOSS complex subunit B1 OS=Mus musculus OX=10090 GN=Nabp2 PE=1 SV=1	7.185	10.8491	85.8	96.8	94.2	94.6	98.1	107.4	101	107.7	102.2	112.2
Q8BUY9	Geranylgeranyl transferase type-1 subunit beta OS=Mus musculus OX=10090 GN=Pggt1b PE=1 SV=1	7.148	7.1618	89.7	92.9	93.9	97	94.9	95.5	119.1	112.5	101.2	103.4
Q8K209	Adhesion G-protein coupled receptor G1 OS=Mus musculus OX=10090 GN=Adgrg1 PE=1 SV=1	6.919	3.63901	72.3	86.4	81.2	79.8	75.7	124	125.5	118	115	122
Q9EPL2	Calsyntenin-1 OS=Mus musculus OX=10090 GN=Clstn1 PE=1 SV=1	6.913	2.55363	91.8	99.3	109.2	98.5	102.4	96.7	82.3	112.1	98.5	109.3
Q9QXY9	Peroxisomal biogenesis factor 3 OS=Mus musculus OX=10090 GN=Pex3 PE=1 SV=1	6.895	5.91398	115.9	91.3	98.2	79	103.5	80.9	83.8	111.6	129	106.8
Q9D684	Ras and Rab interactor 2 OS=Mus musculus OX=10090 GN=Rin2 PE=1 SV=3	6.869	3.433	94.1	91	92.5	93.9	98.6	103.8	105.9	105.4	109	105.8
Q4KMM3	Oxidation resistance protein 1 OS=Mus musculus OX=10090 GN=Oxr1 PE=1 SV=3	6.809	3.23326	86.6	91.2	90.1	101.6	98.3	106.1	104.2	107.9	104.5	109.4
O35082	Klotho OS=Mus musculus OX=10090 GN=Kl PE=1 SV=2	6.746	4.14201	140.6	79.9	123.4	118	147.5	77.7	74.1	82.6	75.4	80.8
Q920D3	Mediator of RNA polymerase II transcription subunit 28 OS=Mus musculus OX=10090 GN=Med28 PE=1 SV=2	6.739	12.3596	85.8	92.8	89.5	100.8	92.2	110.6	103.2	113.6	103.1	108.5
P70206	Plexin-A1 OS=Mus musculus OX=10090 GN=Plxna1 PE=1 SV=1	6.628	1.53115	109.2	93.8	109.6	109.4	86.8	104.2	82.5	94.8	109.1	100.6
A2AQ19	RNA polymerase-associated protein RTF1 homolog OS=Mus musculus OX=10090 GN=Rtf1 PE=1 SV=1	6.619	3.07692	94.4	106.5	100.6	92.8	90.5	103.4	97.5	105.8	98.8	109.9
Q8BZR9	Nuclear cap-binding protein subunit 3 OS=Mus musculus OX=10090 GN=Ncbp3 PE=1 SV=1	6.618	4.71545	103.1	103.9	110.7	95.8	103.4	104.9	108.4	82.4	89.7	97.6
Q9CR50	RING finger and CHY zinc finger domain-containing protein 1 OS=Mus musculus OX=10090 GN=Rchy1 PE=1 SV=1	6.564	8.42912	94.2	111.1	124.4	110.7	83.6	109.7	95.8	92.1	89.8	88.6
Q3UHC7	Disabled homolog 2-interacting protein OS=Mus musculus OX=10090 GN=Dab2ip PE=1 SV=1	6.547	1.85029	90.2	86.6	96.2	89.2	96.1	98.9	102.6	108.5	116.5	115.3
Q9D4V7	Rab-like protein 3 OS=Mus musculus OX=10090 GN=Rabl3 PE=1 SV=1	6.535	11.0169	96.9	107.7	100.6	99.9	97.2	102.9	100	93.7	96.9	104.4
P97310	DNA replication licensing factor MCM2 OS=Mus musculus OX=10090 GN=Mcm2 PE=1 SV=3	6.484	2.32301	87.5	86.7	88.4	87.3	88	112.5	108.5	110.8	118.5	111.9
Q921N6	Probable ATP-dependent RNA helicase DDX27 OS=Mus musculus OX=10090 GN=Ddx27 PE=1 SV=3	6.291	3.94737	109.4	73.1	113.1	122.2	75.3	110	71.1	103.7	105.8	116.2
Q9WTN0	Geranylgeranyl pyrophosphate synthase OS=Mus musculus OX=10090 GN=Ggps1 PE=1 SV=1	6.286	7.33333	81.8	69.9	95.6	82.7	79.8	99.2	117	116.8	134.9	122.4
Q8R1N4	NudC domain-containing protein 3 OS=Mus musculus OX=10090 GN=Nudcd3 PE=1 SV=3	6.277	6.06061	111.4	101.3	97.7	102.2	97.2	85.1	94.2	99.3	105.1	106.5
Q8BT14	CCR4-NOT transcription complex subunit 4 OS=Mus musculus OX=10090 GN=Cnot4 PE=1 SV=2	6.118	3.65217	104.7	103.8	109.8	109.7	107.2	94	102.6	84	90.2	94
Q8C561	G-protein coupled receptor-associated protein LMBRD2 OS=Mus musculus OX=10090 GN=Lmbrd2 PE=1 SV=1	5.957	3.02594	120.3	82.7	121.2	76.7	126.8	69.2	87.3	100.5	118.1	97.1
Q8C4Y3	Negative elongation factor B OS=Mus musculus OX=10090 GN=Nelfb PE=1 SV=2	5.819	3.62069	96.8	85.2	91.3	88.3	93.5	104.9	92.8	117	115.8	114.4
Q6P1E1	Zinc finger MIZ domain-containing protein 1 OS=Mus musculus OX=10090 GN=Zmiz1 PE=1 SV=1	5.717	1.86567	96.4	86.6	94	91.3	102.6	106.7	106.4	103.7	103.7	108.5
Q3V1L6	Myotubularin-related protein 11 OS=Mus musculus OX=10090 GN=Mtmr11 PE=2 SV=1	5.542	3.57143	79.6	76.5	77.5	79.9	116.9	105.6	103.4	114.5	129.5	116.6
Q8VCV9	Sodium-dependent glucose transporter 1A OS=Mus musculus OX=10090 GN=Mfsd4b1 PE=2 SV=2	5.506	3.76471	127.9	94.7	126.9	82.4	140.9	69	91.9	82.6	103.4	80.2
Q8C167	Prolyl endopeptidase-like OS=Mus musculus OX=10090 GN=Prepl PE=1 SV=1	5.47	2.48276	78.2	71.5	81.2	89.5	95.1	104.8	107.5	124.9	123.5	123.7
O70451	Monocarboxylate transporter 2 OS=Mus musculus OX=10090 GN=Slc16a7 PE=1 SV=1	5.415	6.40496	76.7	100.3	104.3	89.1	104.6	97.8	104	102.5	110.8	110
Q9EQ61	Pescadillo homolog OS=Mus musculus OX=10090 GN=Pes1 PE=1 SV=1	5.354	4.79452	83.2	101	92.2	101.6	107.6	94	105.3	100.3	107.7	107
Q5DTU0	Actin filament-associated protein 1-like 2 OS=Mus musculus OX=10090 GN=Afap1l2 PE=1 SV=2	5.196	2.54545	90.7	85.8	80.9	98.6	88	110.8	116.2	108.1	113.4	107.3
Q99KX1	Myeloid leukemia factor 2 OS=Mus musculus OX=10090 GN=Mlf2 PE=1 SV=1	5.183	8.50202	87.9	93.9	94	97.8	84.4	101.5	100.3	113.9	107.2	119.1
Q03146	Epithelial discoidin domain-containing receptor 1 OS=Mus musculus OX=10090 GN=Ddr1 PE=2 SV=2	5.05	2.63447	96.6	88.9	94.5	82.1	98	102	114.1	104.4	115.3	104
P68372	Tubulin beta-4B chain OS=Mus musculus OX=10090 GN=Tubb4b PE=1 SV=1	520.383	75.0562	75.9	80.7	83.9	95.8	85.9	116	90.5	147.9	112	111.3
P22599	Alpha-1-antitrypsin 1-2 OS=Mus musculus OX=10090 GN=Serpina1b PE=1 SV=2	271.77	53.2688	74.1	108.9	90.1	107	87.3	137.9	123	87.9	75.4	108.3
Q9Z0N1	Eukaryotic translation initiation factor 2 subunit 3, X-linked OS=Mus musculus OX=10090 GN=Eif2s3x PE=1 SV=2	204.001	54.661	87.7	102.4	88.2	104.7	86.6	109.8	104.9	108.4	105.4	101.9
Q922F4	Tubulin beta-6 chain OS=Mus musculus OX=10090 GN=Tubb6 PE=1 SV=1	198.704	29.5302	84.4	85.4	89.1	91.9	92.5	106.8	105.2	115.4	117.5	111.8
A2AKK5	Acyl-coenzyme A amino acid N-acyltransferase 1 OS=Mus musculus OX=10090 GN=Acnat1 PE=1 SV=1	138.991	38.9423	107.6	113.1	95.3	112.5	111.1	90.7	98	86.7	93.9	91.2
P48024	Eukaryotic translation initiation factor 1 OS=Mus musculus OX=10090 GN=Eif1 PE=1 SV=2	137.077	53.9823	102.5	101.3	109.6	111.8	94.6	89.1	101.3	102.3	89.4	98
P32883	GTPase KRas OS=Mus musculus OX=10090 GN=Kras PE=1 SV=1	109.224	53.4392	97.1	88.8	86.8	98.7	97.8	119.1	101.7	100.4	103.5	106.2
P43024	Cytochrome c oxidase subunit 6A1, mitochondrial OS=Mus musculus OX=10090 GN=Cox6a1 PE=1 SV=2	109.143	61.2613	100.4	98.5	106.9	106.4	101.7	106.5	89	103	91.3	96.2
P48771	Cytochrome c oxidase subunit 7A2, mitochondrial OS=Mus musculus OX=10090 GN=Cox7a2 PE=1 SV=2	94.14	59.0361	98.1	112.9	113.7	101.2	121	92.6	96.5	84.2	90	89.9
P34884	Macrophage migration inhibitory factor OS=Mus musculus OX=10090 GN=Mif PE=1 SV=2	93.69	80	94.9	107	107.5	104.6	96.7	104.2	99.5	94.2	96.2	95.2
P57722	Poly(rC)-binding protein 3 OS=Mus musculus OX=10090 GN=Pcbp3 PE=1 SV=3	86.992	38.5445	85.6	82.9	93.2	92.1	91.3	118.2	109.7	106	109.2	111.8
P08556	GTPase NRas OS=Mus musculus OX=10090 GN=Nras PE=1 SV=1	82.075	59.7884	98.9	87.1	92.3	90.4	90.7	102.8	101	108.9	113.3	114.5
P36536	GTP-binding protein SAR1a OS=Mus musculus OX=10090 GN=Sar1a PE=1 SV=1	74.818	31.8182	107	101.9	98.1	98	99.4	86	86.6	111	95.4	116.7
P61961	Ubiquitin-fold modifier 1 OS=Mus musculus OX=10090 GN=Ufm1 PE=1 SV=1	71.273	58.8235	100.8	96.8	106.1	100.1	95	98.7	107.4	97.7	97.2	100
Q9CPQ8	ATP synthase subunit g, mitochondrial OS=Mus musculus OX=10090 GN=Atp5mg PE=1 SV=1	69.428	39.8058	115.9	130.6	125.9	103.6	126.3	73.7	96.6	74.6	76.7	76
Q8JZS0	Protein lin-7 homolog A OS=Mus musculus OX=10090 GN=Lin7a PE=1 SV=2	67.826	45.4936	105.4	96	89.2	107.1	108.3	99.1	97.7	96.7	108.6	92
P62320	Small nuclear ribonucleoprotein Sm D3 OS=Mus musculus OX=10090 GN=Snrpd3 PE=1 SV=1	67.572	47.619	85.4	99.1	96.2	104.1	87.3	117.3	106.8	103	98.7	102.2
Q9D3D9	ATP synthase subunit delta, mitochondrial OS=Mus musculus OX=10090 GN=Atp5f1d PE=1 SV=1	67.264	41.0714	99.2	111.4	108.7	116.5	100.8	103.5	93.7	87.9	84.2	94.3
P05132	cAMP-dependent protein kinase catalytic subunit alpha OS=Mus musculus OX=10090 GN=Prkaca PE=1 SV=3	65.698	32.7635	96.6	92.9	101.7	90.9	110.3	92.9	95.3	110.2	109.3	100
P31324	cAMP-dependent protein kinase type II-beta regulatory subunit OS=Mus musculus OX=10090 GN=Prkar2b PE=1 SV=3	65.309	19.2308	88.5	93.5	96.1	113.4	89.7	113	108.3	111	96	90.6
Q78YZ6	Short coiled-coil protein OS=Mus musculus OX=10090 GN=Scoc PE=1 SV=1	64.71	44.8	101.6	97.2	97.7	107	101.1	103.1	95.6	101.8	97.6	97.4
P26150	3 beta-hydroxysteroid dehydrogenase/Delta 5-->4-isomerase type 3 OS=Mus musculus OX=10090 GN=Hsd3b3 PE=1 SV=3	64.648	27.6139	139	98	116.1	96.2	139.3	62.9	79.9	86.2	90.8	91.5
Q9JKB3	Y-box-binding protein 3 OS=Mus musculus OX=10090 GN=Ybx3 PE=1 SV=2	62.539	24.6537	81.9	91.1	86.8	91.4	76.8	106.9	110.9	112.6	109.8	131.7
O35127	Protein C10 OS=Mus musculus OX=10090 GN=Grcc10 PE=1 SV=1	61.391	46.0317	87.7	104.3	105.8	96.7	97.8	111.1	108	97.9	93.4	97.2
P68181	cAMP-dependent protein kinase catalytic subunit beta OS=Mus musculus OX=10090 GN=Prkacb PE=1 SV=2	59.967	35.3276	97	95.2	99.2	90.2	114.6	86.9	93.4	113.2	110.7	99.5
P60824	Cold-inducible RNA-binding protein OS=Mus musculus OX=10090 GN=Cirbp PE=1 SV=1	55.855	33.1395	63.8	81.6	71.6	79.1	77.5	138.1	150.9	113.4	112.4	111.5
Q8K0H1	Multidrug and toxin extrusion protein 1 OS=Mus musculus OX=10090 GN=Slc47a1 PE=1 SV=2	55.131	11.6402	116.3	83.9	117.6	82.7	144.5	69	96.5	89.5	112.2	87.9
O70577	Solute carrier family 22 member 2 OS=Mus musculus OX=10090 GN=Slc22a2 PE=1 SV=1	54.267	8.86076	122	81	101.8	77.5	135.2	68.3	89.1	99.7	136.6	88.8
Q8VDT1	Sodium/glucose cotransporter 4 OS=Mus musculus OX=10090 GN=Slc5a9 PE=1 SV=3	53.889	8.61314	105.7	92.9	103.1	79.6	124.3	81.5	94.7	98.5	118.2	101.5
Q9CQ22	Ragulator complex protein LAMTOR1 OS=Mus musculus OX=10090 GN=Lamtor1 PE=1 SV=1	52.21	42.236	91.6	87.5	92.4	100.3	93.9	104.2	97.3	111.1	114.4	107.2
Q8BYK6	YTH domain-containing family protein 3 OS=Mus musculus OX=10090 GN=Ythdf3 PE=1 SV=2	51.604	12.1368	108.9	104.3	104.9	99.1	100.4	98.9	105.2	86.3	91.4	100.6
Q99NB8	Ubiquilin-4 OS=Mus musculus OX=10090 GN=Ubqln4 PE=1 SV=1	51.182	17.953	92.9	95.6	101.9	99.4	95.6	113.8	96.3	99.4	102.8	102.2
Q6PCP5	Mitochondrial fission factor OS=Mus musculus OX=10090 GN=Mff PE=1 SV=1	50.37	28.5223	98.2	92.2	103.2	104.1	96.6	84.2	99.5	100.7	114.6	106.6
P84089	Enhancer of rudimentary homolog OS=Mus musculus OX=10090 GN=Erh PE=1 SV=1	49.301	43.2692	85	117.7	102.7	106.3	77.3	121.7	102.9	102.8	88.9	94.6
Q9D273	Corrinoid adenosyltransferase OS=Mus musculus OX=10090 GN=Mmab PE=1 SV=1	49.116	24.8945	100.5	109.3	115.8	116.1	102.1	97.5	85.6	91.7	87.3	94
P63321	Ras-related protein Ral-A OS=Mus musculus OX=10090 GN=Rala PE=1 SV=1	48.481	32.5243	99.1	97.3	91.6	99.1	109.2	110.6	112.4	97.1	92.6	91.1
Q9CR21	Acyl carrier protein, mitochondrial OS=Mus musculus OX=10090 GN=Ndufab1 PE=1 SV=1	47.862	23.7179	141	115.6	122.5	103.8	124.9	77.1	98.8	66.3	74.7	75.3
Q9CQZ6	NADH dehydrogenase [ubiquinone] 1 beta subcomplex subunit 3 OS=Mus musculus OX=10090 GN=Ndufb3 PE=1 SV=1	45.962	42.3077	106.2	119.3	110.1	106.9	126.3	87.5	88.1	86.1	87	82.6
P06869	Urokinase-type plasminogen activator OS=Mus musculus OX=10090 GN=Plau PE=1 SV=1	45.79	17.0901	89.8	113.5	101.1	108.5	114.3	125.4	115.3	81.3	76.3	74.6
Q9CZS1	Aldehyde dehydrogenase X, mitochondrial OS=Mus musculus OX=10090 GN=Aldh1b1 PE=1 SV=1	45.346	12.3314	86.2	126.7	117.3	102.5	95.2	95.7	83.7	89.5	98.7	104.5
Q32NY4	Metal transporter CNNM3 OS=Mus musculus OX=10090 GN=Cnnm3 PE=1 SV=2	44.542	11.0799	89.6	78.4	87.6	99.8	87.6	119.7	86.5	122.4	100	128.4
A2A432	Cullin-4B OS=Mus musculus OX=10090 GN=Cul4b PE=1 SV=1	44.446	10.8247	94.6	75.5	96.1	72.7	94.1	85.5	94.3	117.3	116.9	153.1
O08997	Copper transport protein ATOX1 OS=Mus musculus OX=10090 GN=Atox1 PE=1 SV=1	44.37	58.8235	89.5	98.5	96.8	104.3	92.1	109.9	103.2	105.6	96.1	104.1
P63168	Dynein light chain 1, cytoplasmic OS=Mus musculus OX=10090 GN=Dynll1 PE=1 SV=1	44.334	65.1685	97	106.3	97.6	100.9	95.7	99.9	104.1	104.2	97.3	97.1
Q9WV60	Glycogen synthase kinase-3 beta OS=Mus musculus OX=10090 GN=Gsk3b PE=1 SV=2	44.105	21.6667	94.5	98	97.5	94	93.9	100.3	96.5	110.6	104.3	110.3
Q9D687	Sodium-dependent neutral amino acid transporter B(0)AT1 OS=Mus musculus OX=10090 GN=Slc6a19 PE=1 SV=1	43.601	7.57098	121.3	92.4	127.3	82.8	157.2	71.4	72.8	88.2	101.3	85.2
Q6ZWY8	Thymosin beta-10 OS=Mus musculus OX=10090 GN=Tmsb10 PE=1 SV=3	43.436	47.7273	46.6	48	39.5	40.2	37.2	120.5	160.5	139.3	167.2	200.9
Q9WUB4	Dynactin subunit 6 OS=Mus musculus OX=10090 GN=Dctn6 PE=1 SV=1	43.339	32.6316	101	92.8	94.2	117	88.1	106.1	111.4	99.6	92.2	97.8
P07361	Alpha-1-acid glycoprotein 2 OS=Mus musculus OX=10090 GN=Orm2 PE=1 SV=1	42.895	26.087	17.9	26	18.3	22.8	21.7	333.6	262.7	94.4	101.7	100.8
Q3TTY5	Keratin, type II cytoskeletal 2 epidermal OS=Mus musculus OX=10090 GN=Krt2 PE=1 SV=1	42.893	8.20368	220.1	61.3	80.1	191.5	80	72.7	80	60	94.8	59.6
Q9D8N2	DENN domain-containing protein 10 OS=Mus musculus OX=10090 GN=Dennd10 PE=1 SV=2	42.196	17.6471	96.9	87.6	95.1	81.5	105.9	89.4	116.5	104.3	119.1	103.7
Q9CY50	Translocon-associated protein subunit alpha OS=Mus musculus OX=10090 GN=Ssr1 PE=1 SV=1	40.69	20.979	118.6	101.9	103.6	99.8	100.8	84.9	99.5	93.9	102.4	94.5
Q62086	Serum paraoxonase/arylesterase 2 OS=Mus musculus OX=10090 GN=Pon2 PE=1 SV=2	40.677	19.209	113.3	93.5	95.3	91.8	115.2	87.9	92.7	92.8	110.5	107
Q6P2B1	Transportin-3 OS=Mus musculus OX=10090 GN=Tnpo3 PE=1 SV=1	40.64	7.1506	87.5	78.9	91.1	78.9	106	87.5	99	116.3	135.5	119.3
Q925E7	Serine/threonine-protein phosphatase 2A 55 kDa regulatory subunit B delta isoform OS=Mus musculus OX=10090 GN=Ppp2r2d PE=1 SV=1	40.564	18.543	98	89.9	102.6	100.3	95.7	103.4	98.6	102.8	104.4	104.4
Q9D0J8	Parathymosin OS=Mus musculus OX=10090 GN=Ptms PE=1 SV=3	40.267	23.7624	97.6	99.6	99.1	108.1	93.2	111.3	99.7	96.3	95.1	99.9
P62746	Rho-related GTP-binding protein RhoB OS=Mus musculus OX=10090 GN=Rhob PE=1 SV=1	40.226	35.2041	70	78.1	72.3	68.2	87.4	116	127.2	116.3	135.2	129.4
P97493	Thioredoxin, mitochondrial OS=Mus musculus OX=10090 GN=Txn2 PE=1 SV=1	39.754	41.5663	118	115.4	120.1	108	125.2	85.6	93.2	70.7	85.9	77.8
P61924	Coatomer subunit zeta-1 OS=Mus musculus OX=10090 GN=Copz1 PE=1 SV=1	39.399	27.1186	101.7	89.3	95.7	88.4	97.4	88.4	99.5	115.1	118.3	106.2
Q91ZT5	FYVE, RhoGEF and PH domain-containing protein 4 OS=Mus musculus OX=10090 GN=Fgd4 PE=1 SV=1	39.395	10.0522	99.7	99.2	101.9	103.5	110.1	94.7	93.1	99.3	104.4	94
Q9CQY6	Ubiquinol-cytochrome-c reductase complex assembly factor 2 OS=Mus musculus OX=10090 GN=Uqcc2 PE=1 SV=1	39.27	33.0882	116.4	125.7	117.5	123.5	109.2	85.3	79.3	79	83	81.1
Q3UHH1	Zinc finger SWIM domain-containing protein 8 OS=Mus musculus OX=10090 GN=Zswim8 PE=1 SV=1	39.102	4.63974	83.4	81.6	91.7	89.9	91.2	106.5	101.5	114.8	119	120.2
Q62087	Serum paraoxonase/lactonase 3 OS=Mus musculus OX=10090 GN=Pon3 PE=1 SV=2	38.592	20.0565	99.6	96.9	92.7	92.9	106.9	96.8	96.4	102.3	109.3	106.1
Q9CPU4	Microsomal glutathione S-transferase 3 OS=Mus musculus OX=10090 GN=Mgst3 PE=1 SV=1	38.209	50.3268	132.6	115.5	125.2	98.3	100.8	88	89.3	78.2	92.9	79.2
Q9QYF9	Protein NDRG3 OS=Mus musculus OX=10090 GN=Ndrg3 PE=1 SV=1	37.984	18.1333	114.2	104	123.2	106.7	117	80.9	83.4	91.6	92.3	86.6
Q9D7W5	Mediator of RNA polymerase II transcription subunit 8 OS=Mus musculus OX=10090 GN=Med8 PE=1 SV=1	37.958	24.6269	93.4	89.6	96.3	100.8	93.2	105.8	98.3	105.2	105.2	112.1
Q8VI94	2'-5'-oligoadenylate synthase-like protein 1 OS=Mus musculus OX=10090 GN=Oasl1 PE=2 SV=1	37.863	14.4814	53	73.4	52.3	61.6	59.2	108.5	133.5	131.2	183.9	143.3
Q9EPK6	Nucleotide exchange factor SIL1 OS=Mus musculus OX=10090 GN=Sil1 PE=1 SV=2	37.825	14.4086	106	90.7	96.4	89.4	102.7	79	95.6	106.7	118	115.4
P62855	40S ribosomal protein S26 OS=Mus musculus OX=10090 GN=Rps26 PE=1 SV=3	37.719	37.3913	106	105.7	111.6	98.8	93.5	103.6	89.7	95.5	91.3	104.1
Q62241	U1 small nuclear ribonucleoprotein C OS=Mus musculus OX=10090 GN=Snrpc PE=1 SV=1	37.664	20.1258	91.6	114.5	105.2	110.4	78.4	118.1	98.3	97.1	90.5	95.9
Q3TPE9	Ankyrin repeat and MYND domain-containing protein 2 OS=Mus musculus OX=10090 GN=Ankmy2 PE=1 SV=1	37.441	11.3636	104.2	94.3	101.6	94	110.6	83.3	90.4	107.8	114.2	99.7
Q8BGQ1	Spermatogenesis-defective protein 39 homolog OS=Mus musculus OX=10090 GN=Vipas39 PE=1 SV=1	36.855	8.14664	100.8	88.3	109.2	85.7	105.8	88	97.4	108.7	112.4	103.8
Q9CZR2	N-acetylated-alpha-linked acidic dipeptidase 2 OS=Mus musculus OX=10090 GN=Naalad2 PE=1 SV=2	36.746	10.4054	96	104.6	95.7	100.2	99	102.7	93.5	102.7	103.8	101.8
Q6P9J5	KN motif and ankyrin repeat domain-containing protein 4 OS=Mus musculus OX=10090 GN=Kank4 PE=1 SV=1	36.707	7.28346	92	101.2	97.3	104.5	105.8	99.9	97.1	98.2	99.2	104.8
Q9DD18	D-aminoacyl-tRNA deacylase 1 OS=Mus musculus OX=10090 GN=Dtd1 PE=1 SV=2	36.657	27.7512	86.1	114.7	101.4	114	90.6	107.1	106.1	97.3	89.2	93.5
Q8VCM3	Zinc finger FYVE domain-containing protein 21 OS=Mus musculus OX=10090 GN=Zfyve21 PE=1 SV=2	36.634	20.9402	95.5	96.7	94.9	106.2	93.3	112.3	101.2	101.8	101.1	96.9
P52432	DNA-directed RNA polymerases I and III subunit RPAC1 OS=Mus musculus OX=10090 GN=Polr1c PE=1 SV=3	36.594	22.2543	103.3	80.4	100.4	93	92.2	104.9	98.2	104.7	109.1	113.8
Q8BK30	NADH dehydrogenase [ubiquinone] flavoprotein 3, mitochondrial OS=Mus musculus OX=10090 GN=Ndufv3 PE=1 SV=1	36.329	50.9615	110.5	128.2	118.5	122.8	104.3	96.3	90.1	79.1	75.1	75.1
Q80VJ2	Steroid receptor RNA activator 1 OS=Mus musculus OX=10090 GN=Sra1 PE=1 SV=3	35.918	20.2586	87.8	91.5	85.5	91.2	94.1	104.9	98.8	110.6	112.6	122.9
Q9Z110	Delta-1-pyrroline-5-carboxylate synthase OS=Mus musculus OX=10090 GN=Aldh18a1 PE=1 SV=2	35.916	8.05031	53.6	72.1	60.7	61.3	180.8	76	184.7	85.2	127.5	98.1
P21460	Cystatin-C OS=Mus musculus OX=10090 GN=Cst3 PE=1 SV=2	35.435	46.4286	115.9	109.7	106.8	116.1	110	88.9	89.8	93	85.1	84.9
Q9D0I4	Syntaxin-17 OS=Mus musculus OX=10090 GN=Stx17 PE=1 SV=1	35.39	23.9203	107.2	100.1	103.2	110.2	103.6	96.6	82	100.2	95.1	101.7
P60867	40S ribosomal protein S20 OS=Mus musculus OX=10090 GN=Rps20 PE=1 SV=1	35.123	33.6134	92.1	101.7	104.5	103.7	99	103	101.2	98.2	94.1	102.5
P56873	Protein ZNRD2 OS=Mus musculus OX=10090 GN=Znrd2 PE=1 SV=1	35.081	31.1558	101.5	111.2	104.5	111.9	94.9	94.1	89.2	95.5	96	101.2
P03921	NADH-ubiquinone oxidoreductase chain 5 OS=Mus musculus OX=10090 GN=Mtnd5 PE=1 SV=3	35.01	9.88468	158.8	104.3	124.3	72.1	140.2	58.2	86.3	74.4	106.5	74.8
Q9D0B6	Protein PBDC1 OS=Mus musculus OX=10090 GN=Pbdc1 PE=1 SV=1	34.965	33.8384	86.3	98.8	94.5	104.2	92.3	107.4	97.4	112.4	99	107.6
Q9D0J4	ADP-ribosylation factor-like protein 2 OS=Mus musculus OX=10090 GN=Arl2 PE=1 SV=1	34.784	34.2391	92.3	97.1	101.6	101.7	100.5	93.9	94.7	104	103.1	111.1
Q9Z0F7	Gamma-synuclein OS=Mus musculus OX=10090 GN=Sncg PE=1 SV=1	34.691	44.7154	84.8	82.5	92.1	113.6	82.4	112.9	132.2	113.5	95.3	90.6
A2APV2	Formin-like protein 2 OS=Mus musculus OX=10090 GN=Fmnl2 PE=1 SV=2	34.449	7.09024	62.4	72	65.1	58.5	70.5	118.6	124	148.2	147.5	133.2
Q3US41	Epithelial splicing regulatory protein 1 OS=Mus musculus OX=10090 GN=Esrp1 PE=1 SV=2	34.445	12.6471	78.6	86.8	82.2	100.3	93.4	107.8	89.8	131.4	111.2	118.5
Q8R570	Synaptosomal-associated protein 47 OS=Mus musculus OX=10090 GN=Snap47 PE=1 SV=1	34.364	14.5278	124.9	113.8	117.1	116.1	125.5	73.2	81.9	83.6	83.2	80.6
P09813	Apolipoprotein A-II OS=Mus musculus OX=10090 GN=Apoa2 PE=1 SV=2	34.262	46.0784	80.1	176.8	75.3	132.7	110.6	81.1	105.5	67.9	44.1	125.9
Q9Z2D3	Gasdermin-E OS=Mus musculus OX=10090 GN=Gsdme PE=1 SV=1	34.037	15.0391	94.4	83.5	96	93.7	106.5	97.9	98.7	108.7	110.2	110.5
Q91XB0	Three-prime repair exonuclease 1 OS=Mus musculus OX=10090 GN=Trex1 PE=1 SV=2	33.942	16.5605	48.6	55.9	46	52.6	44.2	157.9	161.9	139.4	141.4	152
Q9CQA6	Coiled-coil-helix-coiled-coil-helix domain-containing protein 1 OS=Mus musculus OX=10090 GN=Chchd1 PE=1 SV=1	33.751	42.3729	116.9	119.5	115.5	112.8	112.7	90.4	91.3	78.7	82.8	79.4
P46062	Signal-induced proliferation-associated protein 1 OS=Mus musculus OX=10090 GN=Sipa1 PE=1 SV=2	33.638	5.97878	61.6	83.1	74.1	84.8	69.1	162.7	105.1	125.9	86.1	147.5
Q9D4J1	EF-hand domain-containing protein D1 OS=Mus musculus OX=10090 GN=Efhd1 PE=1 SV=1	33.437	22.9167	107.7	151.8	140.9	116.8	115.3	78.2	75.2	73.5	69.7	70.8
Q91Y63	Solute carrier family 13 member 3 OS=Mus musculus OX=10090 GN=Slc13a3 PE=1 SV=1	33.134	12.6667	157.9	118.7	104.7	84.9	108.9	88.4	81.9	81.7	81.7	91.4
Q9CQA9	Cancer-related nucleoside-triphosphatase homolog OS=Mus musculus OX=10090 GN=Ntpcr PE=1 SV=1	33.009	37.8947	96.7	100	100.7	105.9	107.2	102.8	95.5	97.5	94.7	99
Q9CR39	WD repeat domain phosphoinositide-interacting protein 3 OS=Mus musculus OX=10090 GN=Wdr45b PE=1 SV=2	32.976	17.7326	93.8	93.2	97.6	97.2	95.7	104.1	106.1	104.4	104.9	102.9
Q9CPY1	39S ribosomal protein L51, mitochondrial OS=Mus musculus OX=10090 GN=Mrpl51 PE=1 SV=1	32.93	29.6875	108.1	130	121.1	117	106.5	88	76.5	80.2	81.4	91.2
Q9D1X0	Nucleolar protein 3 OS=Mus musculus OX=10090 GN=Nol3 PE=1 SV=1	32.756	24.0909	94.2	102.6	112.5	97.1	97.1	112.3	88.8	99.8	101.1	94.5
Q5S006	Leucine-rich repeat serine/threonine-protein kinase 2 OS=Mus musculus OX=10090 GN=Lrrk2 PE=1 SV=2	32.755	1.97863	103.9	88.4	106.5	96	112.1	86.4	78.8	100.5	116.4	111.1
Q9DBG1	Sterol 26-hydroxylase, mitochondrial OS=Mus musculus OX=10090 GN=Cyp27a1 PE=1 SV=1	32.428	13.8837	103	89.7	88.4	87.5	121.6	83.1	105.9	100.6	123	97.1
Q99M07	Cytochrome c oxidase assembly factor 5 OS=Mus musculus OX=10090 GN=Coa5 PE=1 SV=1	32.21	58.1081	120	147	121.1	126.8	85.4	90.1	75	80.3	73.9	80.6
Q8BW75	Amine oxidase [flavin-containing] B OS=Mus musculus OX=10090 GN=Maob PE=1 SV=4	32.195	13.6538	94.5	71.5	83.3	83.4	120.7	92.3	109.7	105.9	130.2	108.6
Q8BNW9	Kelch repeat and BTB domain-containing protein 11 OS=Mus musculus OX=10090 GN=Kbtbd11 PE=1 SV=3	32.017	13.2701	105.2	95.9	115.4	102.8	100	89.3	97.7	94.8	100.3	98.6
Q80YR4	E3 ubiquitin-protein ligase ZNF598 OS=Mus musculus OX=10090 GN=Znf598 PE=1 SV=1	31.865	5.94714	92.5	83.9	89.9	96.9	84.7	112.7	97.7	114.3	113.9	113.4
P27005	Protein S100-A8 OS=Mus musculus OX=10090 GN=S100a8 PE=1 SV=3	31.84	37.0787	32.9	45.8	30.8	67.2	35.5	181.9	191.4	146.6	82.9	185.1
Q8CH72	E3 ubiquitin-protein ligase TRIM32 OS=Mus musculus OX=10090 GN=Trim32 PE=1 SV=2	31.657	7.63359	85.3	86.2	79	99.9	83.4	109.2	86.8	130.8	114.1	125.3
P59235	Nucleoporin Nup43 OS=Mus musculus OX=10090 GN=Nup43 PE=1 SV=2	31.626	16.0526	82.4	95.5	92	103.7	87.8	120.8	112.8	102.2	96.2	106.6
Q9Z2E1	Methyl-CpG-binding domain protein 2 OS=Mus musculus OX=10090 GN=Mbd2 PE=2 SV=2	31.533	15.2174	85.2	94	90.5	96.3	92.5	114.1	108.3	103.2	104.5	111.3
P15306	Thrombomodulin OS=Mus musculus OX=10090 GN=Thbd PE=1 SV=1	31.529	10.052	86.2	73.2	88.8	80.5	84.4	108.8	115.7	108.7	129.6	124.2
Q8R1X6	Spartin OS=Mus musculus OX=10090 GN=Spart PE=1 SV=1	31.392	9.23994	105.1	103.7	100.3	101.5	102.2	99.8	96.2	91	101.6	98.7
Q9QZ23	NFU1 iron-sulfur cluster scaffold homolog, mitochondrial OS=Mus musculus OX=10090 GN=Nfu1 PE=1 SV=2	31.193	21.9608	123.3	121.7	129.1	112.4	114.8	77.5	97.6	65.3	80.3	78
Q8BFU3	RING finger protein 214 OS=Mus musculus OX=10090 GN=Rnf214 PE=1 SV=1	31.144	10.6287	102.2	91.6	95.6	101.7	97.6	105.9	90.3	98.3	102.6	114.2
E9PXF8	Myotubularin-related protein 13 OS=Mus musculus OX=10090 GN=Sbf2 PE=1 SV=1	30.942	4.11325	86.5	89.9	88.1	97	98.9	108	93	110.3	114.5	113.7
Q80Y14	Glutaredoxin-related protein 5, mitochondrial OS=Mus musculus OX=10090 GN=Glrx5 PE=1 SV=2	30.87	34.8684	108.6	111.6	119.1	118	107.1	96.4	92	83.8	79.6	83.9
Q8C079	Striatin-interacting protein 1 OS=Mus musculus OX=10090 GN=Strip1 PE=1 SV=2	30.864	8.72162	97.4	77.3	96.9	87.1	101.5	89.6	91.3	115.9	127.7	115.4
Q99J23	GH3 domain-containing protein OS=Mus musculus OX=10090 GN=Ghdc PE=2 SV=2	30.86	11.4662	106.2	88	104.1	91.8	115.5	77.3	89.6	104.6	118.7	104.2
Q8BPN8	DmX-like protein 2 OS=Mus musculus OX=10090 GN=Dmxl2 PE=1 SV=3	30.82	2.24274	83.1	88.5	82.9	107.2	98.3	106.8	93.9	118	108.5	112.7
O08912	Polypeptide N-acetylgalactosaminyltransferase 1 OS=Mus musculus OX=10090 GN=Galnt1 PE=1 SV=1	30.739	9.12343	120.7	85.9	105.3	90.5	107.1	90.8	81.9	107.7	109.3	100.8
Q9QXW9	Large neutral amino acids transporter small subunit 2 OS=Mus musculus OX=10090 GN=Slc7a8 PE=1 SV=1	30.583	15.6309	111.8	99	114.3	79.8	130.3	71.7	100	85.4	113.1	94.6
Q9CPX7	28S ribosomal protein S16, mitochondrial OS=Mus musculus OX=10090 GN=Mrps16 PE=1 SV=1	30.505	40	99.3	123.1	111.1	112.3	114.7	88.5	93.5	83.5	82.4	91.6
Q6Y685	Transforming acidic coiled-coil-containing protein 1 OS=Mus musculus OX=10090 GN=Tacc1 PE=1 SV=1	30.38	6.71835	86.5	94.7	96.3	98.5	87.3	112.6	103.3	100.5	112.7	107.6
P01867	Ig gamma-2B chain C region OS=Mus musculus OX=10090 GN=Igh-3 PE=1 SV=3	30.306	15.099	87.1	97.7	87.1	97.7	90.7	136.6	96.4	89.7	95.2	121.7
Q8BG95	Protein phosphatase 1 regulatory subunit 12B OS=Mus musculus OX=10090 GN=Ppp1r12b PE=1 SV=2	30.287	5.43033	92.5	97.6	101.3	104.7	92.4	106.7	107.7	92.5	103.8	100.9
Q80TV8	CLIP-associating protein 1 OS=Mus musculus OX=10090 GN=Clasp1 PE=1 SV=2	30.211	4.10423	91.2	74.2	84.9	90.4	99	105	90.6	129.7	115.6	119.5
Q9JL35	High mobility group nucleosome-binding domain-containing protein 5 OS=Mus musculus OX=10090 GN=Hmgn5 PE=1 SV=2	30.109	17.734	78.1	81.3	86.6	99.7	92.8	118.8	117.8	107.1	114.1	103.9
Q6DID3	SR-related and CTD-associated factor 8 OS=Mus musculus OX=10090 GN=Scaf8 PE=1 SV=1	30.053	5.83596	85	89.1	87.6	100.4	106.7	102.4	94.7	104.1	118.6	111.4
Q7TPM9	Myotubularin-related protein 10 OS=Mus musculus OX=10090 GN=Mtmr10 PE=1 SV=2	29.969	11.284	92.9	83.9	95.3	86	108.6	115.6	103	107.7	101.5	105.4
Q62048	Astrocytic phosphoprotein PEA-15 OS=Mus musculus OX=10090 GN=Pea15 PE=1 SV=1	29.916	34.6154	79.6	88.4	85.5	91.5	89.8	115.9	110.9	119.5	113.5	105.4
Q91W67	Ubiquitin-like protein 7 OS=Mus musculus OX=10090 GN=Ubl7 PE=1 SV=2	29.897	19.2105	97.3	94.5	93.2	89.8	103.9	97	97.1	103.7	116.9	106.5
Q8R1U2	Cell growth regulator with EF hand domain protein 1 OS=Mus musculus OX=10090 GN=Cgref1 PE=1 SV=1	29.874	20.9964	149.3	105.6	114.9	124.3	114.2	80.1	74.2	76.2	83.2	77.9
Q9JHE3	Neutral ceramidase OS=Mus musculus OX=10090 GN=Asah2 PE=1 SV=1	29.683	8.46561	109.6	108	84.3	97.2	116.9	88	96.9	97.7	106.6	94.9
Q99LL5	Periodic tryptophan protein 1 homolog OS=Mus musculus OX=10090 GN=Pwp1 PE=1 SV=1	29.511	11.5768	84	94.9	91.2	100.3	89	112	107.7	103.1	103.6	114.1
Q9CQ48	NudC domain-containing protein 2 OS=Mus musculus OX=10090 GN=Nudcd2 PE=1 SV=1	29.275	29.9363	81	87.3	90.2	97.6	116.4	97.4	115	97.7	108.7	108.7
Q925F2	Endothelial cell-selective adhesion molecule OS=Mus musculus OX=10090 GN=Esam PE=1 SV=1	29.169	13.7056	80.8	95.4	88.4	90.7	84	116.5	116.9	109.6	107.7	109.9
Q8R480	Nuclear pore complex protein Nup85 OS=Mus musculus OX=10090 GN=Nup85 PE=1 SV=1	29.116	8.38415	104.7	82	96.8	101.6	96.5	89.1	94.4	100.8	122.7	111.5
Q9JJZ4	Ubiquitin-conjugating enzyme E2 J1 OS=Mus musculus OX=10090 GN=Ube2j1 PE=1 SV=2	29.093	20.4403	113.7	97.5	103.7	102.6	104.7	91.4	98.3	93.2	97.3	97.7
Q8CIM3	D-2-hydroxyglutarate dehydrogenase, mitochondrial OS=Mus musculus OX=10090 GN=D2hgdh PE=1 SV=3	28.978	11.9626	91.3	104.3	94.8	98.8	112.1	95.5	108.7	95	99.6	99.8
A2AWP8	Rho guanine nucleotide exchange factor 10-like protein OS=Mus musculus OX=10090 GN=Arhgef10l PE=1 SV=1	28.879	6.40625	89.7	77.7	82.1	89.6	108.8	93.1	108.2	114.9	119.6	116.3
Q3UVL4	Vacuolar protein sorting-associated protein 51 homolog OS=Mus musculus OX=10090 GN=Vps51 PE=1 SV=2	28.813	7.92839	88.9	77.2	88.1	74.1	98.1	87.9	91.6	116	131.6	146.5
P17439	Lysosomal acid glucosylceramidase OS=Mus musculus OX=10090 GN=Gba PE=1 SV=1	28.733	10.4854	97.9	84.4	93.6	97.4	98.8	99.3	101.4	108.6	106.5	112.2
O35379	Multidrug resistance-associated protein 1 OS=Mus musculus OX=10090 GN=Abcc1 PE=1 SV=1	28.667	5.62827	85.5	87.8	97.7	90.3	105.7	99.4	98	111.9	111.3	112.4
Q9D1L0	Coiled-coil-helix-coiled-coil-helix domain-containing protein 2 OS=Mus musculus OX=10090 GN=Chchd2 PE=2 SV=1	28.591	35.2941	124.8	111.9	120.4	105.9	100.6	107.6	94.7	74.9	80.2	79
Q9CRA7	ATP synthase subunit s, mitochondrial OS=Mus musculus OX=10090 GN=Dmac2l PE=1 SV=1	28.555	26.5	114.2	114.2	120.3	108.3	116.6	86.6	90.9	80.4	81.8	86.5
Q91ZR1	Ras-related protein Rab-4B OS=Mus musculus OX=10090 GN=Rab4b PE=1 SV=2	28.511	38.9671	100.6	90.8	94.5	88.7	101.5	89.7	97.7	109.2	119.1	108.2
Q8R0J7	Vacuolar protein sorting-associated protein 37B OS=Mus musculus OX=10090 GN=Vps37b PE=1 SV=1	28.438	24.2105	97.6	94.3	105.1	102.8	98.4	105.7	98	101.7	94.2	102.2
Q78KK3	Solute carrier family 22 member 18 OS=Mus musculus OX=10090 GN=Slc22a18 PE=1 SV=2	28.33	12.069	147.6	86.7	128.5	80.4	139.7	54.7	71.9	88.5	114.2	87.7
Q99JG3	Annexin A13 OS=Mus musculus OX=10090 GN=Anxa13 PE=1 SV=3	28.274	17.3502	93.8	65.1	66.9	115.9	137.1	102.4	101.6	107.4	115.3	94.4
Q8BG94	COMM domain-containing protein 7 OS=Mus musculus OX=10090 GN=Commd7 PE=1 SV=1	28.057	25	99.5	100	102.5	102.5	103	104.6	90.2	103.4	102.7	91.8
Q921I9	Exosome complex component RRP41 OS=Mus musculus OX=10090 GN=Exosc4 PE=1 SV=3	27.856	20.8163	99.7	101.2	105.3	99.8	96.8	103.7	99.8	93.7	100.5	99.5
Q499X9	Methionine--tRNA ligase, mitochondrial OS=Mus musculus OX=10090 GN=Mars2 PE=1 SV=2	27.853	8.02048	114.5	103.9	123.6	103.6	118.9	82	87.2	81.6	98.7	86.1
Q60823	RAC-beta serine/threonine-protein kinase OS=Mus musculus OX=10090 GN=Akt2 PE=1 SV=1	27.724	16.632	100.9	92.2	92.5	86.5	106.6	92.8	103	108.4	114.4	102.8
A2BH40	AT-rich interactive domain-containing protein 1A OS=Mus musculus OX=10090 GN=Arid1a PE=1 SV=1	27.464	3.28515	87.6	91.2	90	94.9	95.1	103.8	97	117.5	109.8	113.1
Q9CRB6	Tubulin polymerization-promoting protein family member 3 OS=Mus musculus OX=10090 GN=Tppp3 PE=1 SV=1	27.25	23.8636	97.8	90.6	104.5	107	95.9	127.6	100.3	86.4	95.6	94.3
P12399	Protein CTLA-2-alpha OS=Mus musculus OX=10090 GN=Ctla2a PE=2 SV=2	27.18	36.4964	47.6	41.2	47.2	42.2	44.3	99.4	122.1	194.5	176.1	185.4
Q61481	Calcium/calmodulin-dependent 3',5'-cyclic nucleotide phosphodiesterase 1A OS=Mus musculus OX=10090 GN=Pde1a PE=1 SV=3	27.1	11.9266	99.9	89.7	107.5	93.7	109.6	88	97.5	106.3	108.1	99.6
Q99NH2	Partitioning defective 3 homolog OS=Mus musculus OX=10090 GN=Pard3 PE=1 SV=2	26.862	5.32633	115.7	81.6	101.3	120.1	103.6	114.9	95.9	83.1	92.1	91.7
P08607	C4b-binding protein OS=Mus musculus OX=10090 GN=C4bpa PE=1 SV=3	26.822	9.59488	82.4	93.5	80.4	107.3	103.8	141.7	110.8	100.5	76.3	103.4
Q9CQI7	U2 small nuclear ribonucleoprotein B'' OS=Mus musculus OX=10090 GN=Snrpb2 PE=1 SV=1	26.788	23.5556	78.8	98.3	93	94	93	115.2	113.3	102.7	106.5	105.2
P97792	Coxsackievirus and adenovirus receptor homolog OS=Mus musculus OX=10090 GN=Cxadr PE=1 SV=1	26.731	15.0685	97.3	82	90.6	76	91.4	93.7	110.7	115.2	127.3	115.9
P62309	Small nuclear ribonucleoprotein G OS=Mus musculus OX=10090 GN=Snrpg PE=1 SV=1	26.718	76.3158	81.1	100.5	89.2	101.9	85.1	126.2	105.5	107.5	98.9	104
Q8BPM0	Disheveled-associated activator of morphogenesis 1 OS=Mus musculus OX=10090 GN=Daam1 PE=1 SV=4	26.683	6.68524	88.1	96.5	93.7	97.6	110.3	98	96.4	105.6	110.5	103.3
Q8K4B0	Metastasis-associated protein MTA1 OS=Mus musculus OX=10090 GN=Mta1 PE=1 SV=1	26.635	9.23077	94	94.9	99.9	101.3	97.3	101.8	89.4	106.3	101.5	113.8
Q9CRA8	Exosome complex component RRP46 OS=Mus musculus OX=10090 GN=Exosc5 PE=1 SV=1	26.568	23.4043	82.1	95.9	85.8	98.4	88.1	115.7	102.7	117.7	106.1	107.4
Q9D1H9	Microfibril-associated glycoprotein 4 OS=Mus musculus OX=10090 GN=Mfap4 PE=1 SV=1	26.524	22.179	114	106.6	92.1	110.4	71.5	137.8	84.6	81.6	89.1	112.3
E9PZJ8	Activating signal cointegrator 1 complex subunit 3 OS=Mus musculus OX=10090 GN=Ascc3 PE=1 SV=1	26.484	2.2293	108.4	83.1	98.1	88.4	94.1	89.4	94.6	102.9	125.6	115.3
Q8BRT1	CLIP-associating protein 2 OS=Mus musculus OX=10090 GN=Clasp2 PE=1 SV=1	26.261	4.27683	86.6	86.2	91	108.1	92.7	106.7	94.3	114	108.5	111.9
Q7TSG2	RNA polymerase II subunit A C-terminal domain phosphatase OS=Mus musculus OX=10090 GN=Ctdp1 PE=1 SV=1	26.057	5.10417	92.7	90.2	99.8	98.9	88.5	104.3	107.8	104	97.1	116.7
Q9CZ83	39S ribosomal protein L55, mitochondrial OS=Mus musculus OX=10090 GN=Mrpl55 PE=1 SV=1	26.01	36.2205	105.2	119.2	113.8	113	103	92.6	97.6	84.4	82.5	88.8
P51906	Excitatory amino acid transporter 3 OS=Mus musculus OX=10090 GN=Slc1a1 PE=1 SV=2	25.849	7.64818	91.5	68.6	91.9	66.8	104.9	143.8	70.9	103.9	173.6	84.1
Q922G0	Solute carrier family 25 member 36 OS=Mus musculus OX=10090 GN=Slc25a36 PE=2 SV=1	25.832	17.6849	160.6	88.7	95.8	109.6	116.4	71.5	76.8	91.1	92.9	96.6
Q3SXD3	5'-deoxynucleotidase HDDC2 OS=Mus musculus OX=10090 GN=Hddc2 PE=1 SV=1	25.775	23.6181	92.4	123.7	99.4	108.7	95.5	97.9	97.5	92	86.7	106.2
Q91ZV4	2-acylglycerol O-acyltransferase 1 OS=Mus musculus OX=10090 GN=Mogat1 PE=1 SV=2	25.753	12.2388	146.3	61.4	82.4	69.6	95	68	85.8	114.9	157.9	118.8
Q8R5J9	PRA1 family protein 3 OS=Mus musculus OX=10090 GN=Arl6ip5 PE=1 SV=2	25.751	20.2128	116.9	93.6	110.6	80.1	111.1	73.3	99.4	93	121.2	100.8
Q8VDL4	ADP-dependent glucokinase OS=Mus musculus OX=10090 GN=Adpgk PE=1 SV=2	25.688	12.7016	117.2	93.4	102.2	88.9	99.3	86	93.1	106.4	111.6	101.8
Q9ER41	Torsin-1B OS=Mus musculus OX=10090 GN=Tor1b PE=1 SV=2	25.669	17.2619	114.5	96.8	102.2	92.8	114.6	83.2	101.2	93.3	106.2	95.4
Q9DBX2	Phosducin-like protein OS=Mus musculus OX=10090 GN=Pdcl PE=1 SV=1	25.643	14.6179	78.5	75.7	82.3	87	83.9	129.1	122.3	114	108.8	118.5
Q80WK2	Organic solute transporter subunit beta OS=Mus musculus OX=10090 GN=Slc51b PE=1 SV=1	25.641	27.3438	100.8	73.3	165.2	85.9	102.9	78.7	85.3	94.9	113.8	99.2
Q9CWP6	Motile sperm domain-containing protein 2 OS=Mus musculus OX=10090 GN=Mospd2 PE=1 SV=2	25.64	8.68726	91.5	88.8	90.9	82.7	100.6	90.2	100.6	117	127.7	110
Q8K1G2	Limbin OS=Mus musculus OX=10090 GN=Evc2 PE=1 SV=1	25.575	4.67213	82.4	81	82.3	108.1	99.6	99.7	88.8	116.5	114.2	127.4
Q9Z2L6	Multiple inositol polyphosphate phosphatase 1 OS=Mus musculus OX=10090 GN=Minpp1 PE=1 SV=3	25.465	13.5135	94	102.6	101.6	103.9	102.7	96.2	94.1	99.7	104.8	100.4
P46737	Lys-63-specific deubiquitinase BRCC36 OS=Mus musculus OX=10090 GN=Brcc3 PE=1 SV=1	25.45	20.9622	99.6	94.9	95.7	101.9	100.7	101.2	90.7	104.4	99.1	111.9
Q3U7U3	F-box only protein 7 OS=Mus musculus OX=10090 GN=Fbxo7 PE=1 SV=2	25.386	10.1338	119.6	96.1	93.8	112.8	98.6	92.3	94	92.3	101.8	98.7
Q640M1	U3 small nucleolar RNA-associated protein 14 homolog A OS=Mus musculus OX=10090 GN=Utp14a PE=1 SV=1	25.357	5.73664	83.8	91.2	89.5	96.4	86.2	121.1	109.1	100.5	105.6	116.5
Q9CY62	E3 ubiquitin-protein ligase RNF181 OS=Mus musculus OX=10090 GN=Rnf181 PE=1 SV=1	25.061	29.0909	130.3	107	120.4	141.5	109.4	73	63.9	85.4	79.9	89.1
Q91WM3	U3 small nucleolar RNA-interacting protein 2 OS=Mus musculus OX=10090 GN=Rrp9 PE=1 SV=1	24.886	9.47368	80.8	99.6	88.9	101.8	87.8	129.3	102.5	102.9	94.8	111.6
Q9CZX9	ER membrane protein complex subunit 4 OS=Mus musculus OX=10090 GN=Emc4 PE=1 SV=1	24.878	27.8689	111.2	96.8	110.2	88.7	108.7	81.4	86.4	100.8	112.2	103.5
Q9Z211	Peroxisomal membrane protein 11A OS=Mus musculus OX=10090 GN=Pex11a PE=1 SV=1	24.689	19.5122	152.2	78.9	98.5	66.8	95.2	75.9	86.3	102	129	115.3
Q8BYB9	Protein O-glucosyltransferase 1 OS=Mus musculus OX=10090 GN=Poglut1 PE=1 SV=2	24.655	10.7143	102.1	102.9	100	100	98.4	93.1	97.8	103.9	99.6	102.2
Q9CQ40	39S ribosomal protein L49, mitochondrial OS=Mus musculus OX=10090 GN=Mrpl49 PE=1 SV=1	24.396	29.5181	112.5	114.3	114.6	110.7	104.9	87.9	84.2	93.1	81.8	96.2
Q80ZK0	28S ribosomal protein S10, mitochondrial OS=Mus musculus OX=10090 GN=Mrps10 PE=1 SV=1	24.324	29.375	115.2	105.4	116.2	111.7	110.8	90.3	87.9	89.1	87.7	85.6
Q8VHK9	ATP-dependent DNA/RNA helicase DHX36 OS=Mus musculus OX=10090 GN=Dhx36 PE=1 SV=2	23.939	4.7952	94.9	96.8	97	95.9	103.3	95.2	93.9	108.9	106.4	107.8
Q6P5E6	ADP-ribosylation factor-binding protein GGA2 OS=Mus musculus OX=10090 GN=Gga2 PE=1 SV=1	23.858	14.4279	89.1	103.8	92.1	104.1	106.7	102.4	95.6	105.8	99	101.4
Q8JZL3	Thiamine-triphosphatase OS=Mus musculus OX=10090 GN=Thtpa PE=1 SV=3	23.749	21.875	92.3	98.2	99.1	108.1	98.4	107.6	97.3	97.9	98.7	102.3
Q91V81	RNA-binding protein 42 OS=Mus musculus OX=10090 GN=Rbm42 PE=1 SV=2	23.74	10.6695	79.1	99.3	94.9	92.4	80.5	125.9	123.1	102.4	98.6	103.8
Q8VCH7	Retinol dehydrogenase 10 OS=Mus musculus OX=10090 GN=Rdh10 PE=1 SV=2	23.696	14.0762	140.7	110	118.5	98.6	140.6	66	74.4	84.7	87.3	79.4
Q9CR86	Calcium-regulated heat stable protein 1 OS=Mus musculus OX=10090 GN=Carhsp1 PE=1 SV=1	23.694	26.3514	79.1	86.4	83.6	84.2	77.2	112.3	127.3	113.9	117	119
Q5U430	E3 ubiquitin-protein ligase UBR3 OS=Mus musculus OX=10090 GN=Ubr3 PE=1 SV=3	23.656	3.49391	88.8	84.8	90.2	86.7	100.5	93.3	89.6	119.9	124.9	121.5
Q7TMR0	Lysosomal Pro-X carboxypeptidase OS=Mus musculus OX=10090 GN=Prcp PE=1 SV=2	23.525	9.16497	128.2	95.4	117	99	123.8	77.1	91.4	87.1	94.3	86.8
Q9CY97	RNA polymerase II subunit A C-terminal domain phosphatase SSU72 OS=Mus musculus OX=10090 GN=Ssu72 PE=1 SV=1	23.379	25.7732	49.1	77.9	55.3	73	133.8	101	148.1	105.1	131.8	125
Q8BUL6	Pleckstrin homology domain-containing family A member 1 OS=Mus musculus OX=10090 GN=Plekha1 PE=1 SV=1	23.344	10.9661	88.1	93.6	94.4	104.5	100.8	106.8	98.6	105.4	104.8	103.1
Q3V4B5	COMM domain-containing protein 6 OS=Mus musculus OX=10090 GN=Commd6 PE=1 SV=1	23.242	54.023	100.5	94.5	102.6	102.2	101.7	109	88.9	99.5	108.7	92.4
Q8K2Q5	Coiled-coil-helix-coiled-coil-helix domain-containing protein 7 OS=Mus musculus OX=10090 GN=Chchd7 PE=1 SV=1	23.136	52.9412	103	104.7	117.5	116	129.9	97.8	88.3	78.7	80.6	83.4
Q80TL7	Protein MON2 homolog OS=Mus musculus OX=10090 GN=Mon2 PE=1 SV=2	22.984	4.60641	87.9	81.2	88.1	95.5	86.4	102.6	93.3	136	105	124
P49698	Hepatocyte nuclear factor 4-alpha OS=Mus musculus OX=10090 GN=Hnf4a PE=1 SV=2	22.778	9.07173	107.7	90.8	106	101.6	124.6	95.5	86.1	99.1	99.4	89.2
Q9JLB9	Nectin-3 OS=Mus musculus OX=10090 GN=Nectin3 PE=1 SV=1	22.572	11.1111	105.4	96	98.6	105.9	101.9	96.6	89.3	106.6	102.8	96.9
Q9JKW0	ADP-ribosylation factor-like protein 6-interacting protein 1 OS=Mus musculus OX=10090 GN=Arl6ip1 PE=1 SV=1	22.481	25.6158	150.3	91.7	127.3	84.8	121.7	67.9	89.8	79.2	101.7	85.8
Q9QYF1	Retinol dehydrogenase 11 OS=Mus musculus OX=10090 GN=Rdh11 PE=1 SV=2	22.475	12.6582	90.9	85.8	99.9	77.8	93.3	85.7	101.7	114.1	130.5	120.4
Q3TC33	Coiled-coil domain-containing protein 127 OS=Mus musculus OX=10090 GN=Ccdc127 PE=1 SV=2	22.427	15.7692	104.9	104	100.7	95.7	110.3	101.4	94.8	94.9	97.9	95.4
Q80UU1	Ankyrin repeat and zinc finger domain-containing protein 1 OS=Mus musculus OX=10090 GN=Ankzf1 PE=1 SV=2	22.292	5.48128	90.7	89	95.3	100.4	95	106.2	95.6	110.3	106	111.6
Q9CR25	2-(3-amino-3-carboxypropyl)histidine synthase subunit 2 OS=Mus musculus OX=10090 GN=Dph2 PE=1 SV=1	22.267	15.3374	90.5	98	95.4	102.9	97.5	104.7	94.1	103.2	107.3	106.5
P51791	H(+)/Cl(-) exchange transporter 3 OS=Mus musculus OX=10090 GN=Clcn3 PE=1 SV=3	22.242	5.50122	100.1	84.8	93.6	79.5	120.3	83.3	108.5	102.1	121.3	106.6
Q924N4	Solute carrier family 12 member 6 OS=Mus musculus OX=10090 GN=Slc12a6 PE=1 SV=2	22.24	4.86957	137.6	80.9	96.5	86.3	124.1	85.9	86.1	97.5	113.1	92
Q9JJA4	Ribosome biogenesis protein WDR12 OS=Mus musculus OX=10090 GN=Wdr12 PE=1 SV=1	22.166	11.1111	71.6	86.3	82.3	90.5	78.7	116.5	116	115.2	109	133.8
Q8K4G1	Latent-transforming growth factor beta-binding protein 4 OS=Mus musculus OX=10090 GN=Ltbp4 PE=1 SV=2	22.095	2.04082	104	97.4	102.3	115.8	97.3	102.6	95.7	93.2	93.2	98.6
A2AEP0	Odorant-binding protein 1b OS=Mus musculus OX=10090 GN=Obp1b PE=1 SV=1	21.957	32.1637	126.3	84.5	74.1	108.2	84.3	99.1	105.1	115.3	100.7	102.4
Q8K4H1	Kynurenine formamidase OS=Mus musculus OX=10090 GN=Afmid PE=1 SV=1	21.894	15.7377	113.7	90.7	94.5	104.2	99.9	88.9	96.1	107.6	104.7	99.8
Q9Z160	Conserved oligomeric Golgi complex subunit 1 OS=Mus musculus OX=10090 GN=Cog1 PE=1 SV=3	21.871	5.20408	97.4	85.4	99.8	80.7	105.1	92.5	93.5	109.7	122.5	113.3
Q9Z2A0	3-phosphoinositide-dependent protein kinase 1 OS=Mus musculus OX=10090 GN=Pdpk1 PE=1 SV=2	21.631	9.12343	92.1	97.1	95.9	102.8	103.8	101	88.9	107	107.3	104.2
Q91YS8	Calcium/calmodulin-dependent protein kinase type 1 OS=Mus musculus OX=10090 GN=Camk1 PE=1 SV=1	21.604	16.0428	99.3	90	96.4	96.9	104.5	94.3	97	103.7	108.5	109.2
Q8CE50	Sorting nexin-30 OS=Mus musculus OX=10090 GN=Snx30 PE=1 SV=1	21.342	10.984	94.1	92.4	94.3	101.2	99.9	112	101.8	101.8	104.6	97.9
P98192	Dihydroxyacetone phosphate acyltransferase OS=Mus musculus OX=10090 GN=Gnpat PE=1 SV=1	21.261	6.63717	122.4	77.7	95.9	77.3	108.4	82.5	78	118.6	127.9	111.4
Q8VEA4	Mitochondrial intermembrane space import and assembly protein 40 OS=Mus musculus OX=10090 GN=Chchd4 PE=1 SV=1	21.172	42.446	128.9	116.9	130.8	107.6	114.8	82.2	97.9	67.2	78.2	75.5
Q99LC8	Translation initiation factor eIF-2B subunit alpha OS=Mus musculus OX=10090 GN=Eif2b1 PE=1 SV=1	21.116	15.7377	97.8	96.9	99.2	77.5	107.3	82.8	97.1	112.3	121.7	107.2
Q00558	40-kDa huntingtin-associated protein OS=Mus musculus OX=10090 GN=F8a1 PE=1 SV=1	20.969	14.4737	92.6	84.9	87	93.8	97.1	111.3	96.7	104.8	122.2	109.5
Q9ESP1	Stromal cell-derived factor 2-like protein 1 OS=Mus musculus OX=10090 GN=Sdf2l1 PE=1 SV=2	20.724	19.0045	99.6	106.9	102.7	106.2	88.7	96	98.3	99.1	96.2	106.3
Q9JKS5	Intracellular hyaluronan-binding protein 4 OS=Mus musculus OX=10090 GN=Habp4 PE=1 SV=2	20.584	11.4355	108	91	98.3	103.9	95.5	98	92.6	99.9	103	109.7
Q8CIE4	Protein mono-ADP-ribosyltransferase PARP10 OS=Mus musculus OX=10090 GN=Parp10 PE=2 SV=1	20.541	5.20833	64.6	77.2	68	81.6	80.2	118.1	104.8	130.8	131.6	143.1
Q8BVF2	Phosducin-like protein 3 OS=Mus musculus OX=10090 GN=Pdcl3 PE=1 SV=1	20.46	24.1667	99.3	98.4	99.3	96.4	90.6	91.1	109	98.6	108.1	109.1
Q8CHW4	Translation initiation factor eIF-2B subunit epsilon OS=Mus musculus OX=10090 GN=Eif2b5 PE=1 SV=1	20.419	5.16039	100.8	81.9	89.4	85.7	96.5	89.5	98.7	111.3	129.5	116.8
O70551	SRSF protein kinase 1 OS=Mus musculus OX=10090 GN=Srpk1 PE=1 SV=2	20.334	7.87037	100	92	103.8	95.1	94.9	91.3	89.3	106.4	111.9	115.5
Q4VAA2	Protein CDV3 OS=Mus musculus OX=10090 GN=Cdv3 PE=1 SV=2	20.278	13.5231	94.1	77.6	94.4	95.5	81.5	98.2	114.6	106.4	124.4	113.2
Q9D0B0	Serine/arginine-rich splicing factor 9 OS=Mus musculus OX=10090 GN=Srsf9 PE=1 SV=1	20.228	17.5676	82.7	92.7	99.1	99.9	86.6	118.1	106.6	102.1	105.2	107
P47964	60S ribosomal protein L36 OS=Mus musculus OX=10090 GN=Rpl36 PE=1 SV=2	20.221	29.5238	118.9	128.1	100.9	103.5	98.8	82.8	84.5	79.3	92.4	110.8
Q91ZM2	SH2B adapter protein 1 OS=Mus musculus OX=10090 GN=Sh2b1 PE=1 SV=2	20.194	6.87831	86.7	90.1	96.8	96.1	94.1	116.5	98.8	105.6	106.6	108.7
O88384	Vesicle transport through interaction with t-SNAREs homolog 1B OS=Mus musculus OX=10090 GN=Vti1b PE=1 SV=1	20.126	19.3966	101.2	92.6	93.3	86.7	101.1	97.5	93.1	110.3	119.6	104.6
O70572	Sphingomyelin phosphodiesterase 2 OS=Mus musculus OX=10090 GN=Smpd2 PE=1 SV=1	20.11	11.2172	148.9	83.8	103.3	76.7	115.3	67.7	81.2	93.5	126.5	103.2
Q8BMD8	Calcium-binding mitochondrial carrier protein SCaMC-1 OS=Mus musculus OX=10090 GN=Slc25a24 PE=1 SV=1	20.1	11.3684	81.5	92	87.5	86.6	94.5	100.9	116.1	118.5	118.6	103.8
Q9D824	Pre-mRNA 3'-end-processing factor FIP1 OS=Mus musculus OX=10090 GN=Fip1l1 PE=1 SV=1	20.051	8.26162	85.6	97.6	92.2	103.5	87.2	115.2	106.2	106.3	103.1	103
Q8C0L8	Conserved oligomeric Golgi complex subunit 5 OS=Mus musculus OX=10090 GN=Cog5 PE=1 SV=3	19.959	6.99638	94.1	80.4	91.4	86.8	108	92.7	90.8	116.2	123.9	115.7
Q6ZPU9	KIF-binding protein OS=Mus musculus OX=10090 GN=Kifbp PE=1 SV=2	19.924	9.72447	104.6	87.5	107.1	95	108.5	83	86.7	109.2	110	108.4
Q91VA1	Choline transporter-like protein 4 OS=Mus musculus OX=10090 GN=Slc44a4 PE=1 SV=1	19.893	5.65771	139.1	98.1	116.5	91	127.7	71.2	70.5	94.3	100.6	91
O70404	Vesicle-associated membrane protein 8 OS=Mus musculus OX=10090 GN=Vamp8 PE=1 SV=1	19.893	40.5941	122.1	89.2	98.4	88.9	100.8	84.5	94.9	108.6	114.9	97.6
P35288	Ras-related protein Rab-23 OS=Mus musculus OX=10090 GN=Rab23 PE=1 SV=2	19.887	21.9409	99.4	102.6	111	103.6	99.1	103.1	100.5	90.5	94.8	95.2
Q9CQB5	CDGSH iron-sulfur domain-containing protein 2 OS=Mus musculus OX=10090 GN=Cisd2 PE=1 SV=1	19.879	26.6667	170.9	95.7	99.8	100.4	110.3	65.8	81.9	81.9	96.2	97.1
Q03160	Growth factor receptor-bound protein 7 OS=Mus musculus OX=10090 GN=Grb7 PE=1 SV=1	19.876	8.78505	95	95.5	98.2	101.6	102	97.4	103.1	107.2	100.1	99.9
Q8VBT0	Thioredoxin-related transmembrane protein 1 OS=Mus musculus OX=10090 GN=Tmx1 PE=1 SV=1	19.847	13.3094	106.3	92.1	94.8	80.2	109.8	76.4	100.7	107	122.2	110.7
O08573	Galectin-9 OS=Mus musculus OX=10090 GN=Lgals9 PE=1 SV=1	19.818	11.898	78.9	98.1	84.7	89.3	81.6	121	119.4	112.4	106.7	108
Q9D4V0	Ethanolamine kinase 1 OS=Mus musculus OX=10090 GN=Etnk1 PE=1 SV=2	19.667	14.0496	100.5	102.6	109.3	92.5	104.4	81.8	85.1	106.9	107.7	109.3
Q80U35	Rho guanine nucleotide exchange factor 17 OS=Mus musculus OX=10090 GN=Arhgef17 PE=1 SV=2	19.548	3.0141	81.1	95.4	100.2	99.1	100.3	99.8	104.4	109.5	109.9	100.3
O55026	Ectonucleoside triphosphate diphosphohydrolase 2 OS=Mus musculus OX=10090 GN=Entpd2 PE=1 SV=2	19.538	8.88889	114.4	93.2	93.4	88.6	109	93.1	90.8	93.7	123.2	100.5
Q923X1	Adhesion G protein-coupled receptor L4 OS=Mus musculus OX=10090 GN=Adgrl4 PE=2 SV=3	19.532	8.38972	104.8	133.3	123.1	120.8	89.3	117.2	74.8	92.7	70.1	73.9
P52293	Importin subunit alpha-1 OS=Mus musculus OX=10090 GN=Kpna2 PE=1 SV=2	19.461	13.2325	93.3	84.4	91	92.8	96.4	105.3	100.5	107.4	115.9	113
P06684	Complement C5 OS=Mus musculus OX=10090 GN=C5 PE=1 SV=2	19.449	3.03571	83.3	118	72.7	101	103.4	138.4	132	85.6	77.5	88.2
O35130	Ribosomal RNA small subunit methyltransferase NEP1 OS=Mus musculus OX=10090 GN=Emg1 PE=1 SV=1	19.448	20.9016	80.8	103.2	88.6	97.7	90.3	120.3	110.5	103.9	98.5	106.2
Q8VE19	GATOR complex protein MIOS OS=Mus musculus OX=10090 GN=Mios PE=1 SV=2	19.427	6.74286	91.8	92.3	92.4	89.7	111.8	95	109.4	102.5	115.3	99.7
A6H5Z3	Exocyst complex component 6B OS=Mus musculus OX=10090 GN=Exoc6b PE=1 SV=1	19.35	5.67901	89.3	74.2	93.8	77.6	91.7	100.4	110.5	117.8	125.2	119.5
P46938	Transcriptional coactivator YAP1 OS=Mus musculus OX=10090 GN=Yap1 PE=1 SV=2	19.269	12.2951	79.4	89.7	83.6	92	80.1	108.5	115.6	109.9	124.7	116.5
Q8BMZ5	tRNA-splicing endonuclease subunit Sen34 OS=Mus musculus OX=10090 GN=Tsen34 PE=2 SV=2	19.25	17.4051	83.8	86.2	98.6	97.4	96	109.6	95.8	109	106.5	117.1
O88939	Zinc finger and BTB domain-containing protein 7A OS=Mus musculus OX=10090 GN=Zbtb7a PE=1 SV=2	19.249	7.90861	84.7	92.5	92	101.2	107.3	99.1	109.4	98.3	109.8	105.6
Q3TX08	tRNA (guanine(26)-N(2))-dimethyltransferase OS=Mus musculus OX=10090 GN=Trmt1 PE=1 SV=2	19.215	9.2006	99.6	85	103	98.8	94.5	102.8	89.2	108.5	107.6	111.1
Q9DC11	Plexin domain-containing protein 2 OS=Mus musculus OX=10090 GN=Plxdc2 PE=1 SV=1	19.213	10.9434	100	93.3	92.7	96.1	100.7	108	93	109.2	105.2	101.9
Q3TIX9	U4/U6.U5 tri-snRNP-associated protein 2 OS=Mus musculus OX=10090 GN=Usp39 PE=1 SV=2	19.205	9.21986	77.5	85.9	85.4	105.3	83.2	117.4	89.8	121.7	109	124.9
Q9D6N5	Dr1-associated corepressor OS=Mus musculus OX=10090 GN=Drap1 PE=1 SV=3	19.181	14.6341	80.9	95	92.8	100.4	92.5	99.7	110.6	113.1	100.2	115
P56542	Deoxyribonuclease-2-alpha OS=Mus musculus OX=10090 GN=Dnase2 PE=1 SV=1	19.082	13.5977	106.9	84	102.5	94.4	86.3	120.8	100.5	102.3	104.2	98.2
Q8BKG3	Inactive tyrosine-protein kinase 7 OS=Mus musculus OX=10090 GN=Ptk7 PE=1 SV=1	19.048	5.64972	89.5	105.5	94.9	99.3	93	102.6	86.3	113	97	118.8
Q8VC88	Grancalcin OS=Mus musculus OX=10090 GN=Gca PE=1 SV=1	18.986	21.8182	81.5	94.7	81	96	94	114.8	99.6	117.9	110.6	109.9
Q8BVI5	Syntaxin-16 OS=Mus musculus OX=10090 GN=Stx16 PE=1 SV=3	18.9	12.2699	117	92.3	104.6	96.3	89.1	102	83.2	108.1	103	104.5
Q8VC03	Echinoderm microtubule-associated protein-like 3 OS=Mus musculus OX=10090 GN=Eml3 PE=1 SV=1	18.838	5.90858	87.3	80.6	87.6	89.1	98.5	96.5	92.7	109.2	114.1	144.4
Q9CZP7	Hsp90 co-chaperone Cdc37-like 1 OS=Mus musculus OX=10090 GN=Cdc37l1 PE=1 SV=1	18.829	15.5224	94.7	92.5	93.8	96.8	98.1	99.7	91.9	110.1	106.4	116.1
Q56A08	G-patch domain and KOW motifs-containing protein OS=Mus musculus OX=10090 GN=Gpkow PE=1 SV=2	18.769	8.60656	96.1	93.3	99.4	96.9	94.3	99.7	104.6	96.1	107.1	112.5
Q8VBX0	Ankyrin repeat and SOCS box protein 13 OS=Mus musculus OX=10090 GN=Asb13 PE=2 SV=1	18.683	19.0647	84.9	114	109	103.8	99.4	94	98.7	96.6	97.8	101.8
Q9JIX0	Transcription and mRNA export factor ENY2 OS=Mus musculus OX=10090 GN=Eny2 PE=1 SV=1	18.654	43.5644	106.3	100.8	100.9	95	101.6	95	101	102.2	102	95.2
Q6RHR9	Membrane-associated guanylate kinase, WW and PDZ domain-containing protein 1 OS=Mus musculus OX=10090 GN=Magi1 PE=1 SV=1	18.635	4.41876	131	88.4	106.3	118.4	93	100.3	98	82.2	91	91.4
Q8K2T4	Ubiquinol-cytochrome-c reductase complex assembly factor 3 OS=Mus musculus OX=10090 GN=Uqcc3 PE=1 SV=1	18.624	33.7079	86	107.2	89.7	97.4	119	116.7	109.2	98.7	79.5	96.7
Q8C1B1	Calmodulin-regulated spectrin-associated protein 2 OS=Mus musculus OX=10090 GN=Camsap2 PE=1 SV=3	18.602	2.87474	88.4	90.9	94.4	103.6	96.1	99.6	105.2	100.4	109.7	111.6
Q9JHS9	Spliceosome-associated protein CWC15 homolog OS=Mus musculus OX=10090 GN=Cwc15 PE=1 SV=1	18.47	23.1441	66.8	86.5	83.4	100.1	75.8	128.2	106.8	126.1	108.3	118
Q8BJF9	Charged multivesicular body protein 2b OS=Mus musculus OX=10090 GN=Chmp2b PE=1 SV=1	18.361	18.3099	82.6	84.6	87.8	98.4	79.5	88.7	112.8	114.7	117.1	133.9
Q61142	Spindlin-1 OS=Mus musculus OX=10090 GN=Spin1 PE=1 SV=2	18.338	19.084	81.4	98.7	94.1	99.8	88.9	109.8	106.7	105	104.2	111.5
Q923T7	E3 ubiquitin-protein ligase TRIM7 OS=Mus musculus OX=10090 GN=Trim7 PE=2 SV=2	18.288	10.9804	87.6	91.9	95.3	112.8	110.2	94.5	95.2	104.4	104.2	103.9
Q9D136	2-oxoglutarate and iron-dependent oxygenase domain-containing protein 3 OS=Mus musculus OX=10090 GN=Ogfod3 PE=2 SV=1	18.26	10.7937	134.1	106.6	125.1	102.8	118	70.8	72	84.9	92.2	93.6
P59041	DnaJ homolog subfamily C member 30, mitochondrial OS=Mus musculus OX=10090 GN=Dnajc30 PE=1 SV=1	18.222	22.8311	126	99.2	122.4	125.7	119.8	80.9	85	73.2	81.8	86.1
P62311	U6 snRNA-associated Sm-like protein LSm3 OS=Mus musculus OX=10090 GN=Lsm3 PE=1 SV=2	18.216	27.451	85.2	101.6	95.9	107	92.1	118.6	100	104.6	96.1	98.8
Q9D3U0	tRNA pseudouridine synthase Pus10 OS=Mus musculus OX=10090 GN=Pus10 PE=1 SV=1	18.123	8.5389	70.8	84.8	83.1	84.2	95.7	107.5	109.4	106.1	111.1	147.3
E9Q735	Ubiquitin conjugation factor E4 A OS=Mus musculus OX=10090 GN=Ube4a PE=1 SV=1	18.117	4.86381	81.4	92.9	94.7	88.3	91.9	128.2	100.6	109.4	96.2	116.4
Q8CIV8	Tubulin-specific chaperone E OS=Mus musculus OX=10090 GN=Tbce PE=1 SV=1	18.092	12.9771	82.5	87.2	91.1	91	93	103	104.4	113.5	112.1	122.1
P34928	Apolipoprotein C-I OS=Mus musculus OX=10090 GN=Apoc1 PE=1 SV=1	18.054	36.3636	94.6	208.4	89	132.1	119.2	69.5	86.9	64.3	42.8	93.1
Q8R1R3	StAR-related lipid transfer protein 7, mitochondrial OS=Mus musculus OX=10090 GN=Stard7 PE=1 SV=2	18.003	12.8686	118.3	86	104.9	109.7	97.8	96	92.7	95.6	105	93.9
Q9JI33	Netrin-4 OS=Mus musculus OX=10090 GN=Ntn4 PE=1 SV=2	18.001	7.64331	80.8	90.7	101.5	95.6	109.4	109.4	114.4	102.6	93.1	102.6
Q505B7	Protein archease OS=Mus musculus OX=10090 GN=Zbtb8os PE=1 SV=2	17.897	19.6429	109.7	100.6	103.1	106.8	89	103.9	101.7	95.6	93.3	96.4
Q5F2E8	Serine/threonine-protein kinase TAO1 OS=Mus musculus OX=10090 GN=Taok1 PE=1 SV=1	17.799	4.5954	95.8	96.5	98.7	105.5	93.6	102.2	95.3	97.9	102.8	111.7
Q8CI78	Required for meiotic nuclear division protein 1 homolog OS=Mus musculus OX=10090 GN=Rmnd1 PE=1 SV=1	17.75	11.1111	118.5	94.4	129.3	90.3	141.1	70.4	89	83.6	99.9	83.3
Q9QY23	Plakophilin-3 OS=Mus musculus OX=10090 GN=Pkp3 PE=1 SV=2	17.595	5.64617	94.3	71.1	83.4	98.2	84.5	117.5	82.5	132.4	115.6	120.5
P07091	Protein S100-A4 OS=Mus musculus OX=10090 GN=S100a4 PE=1 SV=1	17.517	23.7624	74.7	105.4	94.6	106.7	82.4	132.8	135.7	102.5	77.5	87.7
O88876	Short-chain dehydrogenase/reductase 3 OS=Mus musculus OX=10090 GN=Dhrs3 PE=1 SV=2	17.475	15.894	126.9	95.9	108.7	104.9	124.5	85.9	76.9	94.9	90.9	90.5
Q8BXC6	COMM domain-containing protein 2 OS=Mus musculus OX=10090 GN=Commd2 PE=1 SV=1	17.422	24.6231	91.2	92.7	89.5	95.8	100.5	106.9	101.5	106	109.1	106.8
Q9Z210	Peroxisomal membrane protein 11B OS=Mus musculus OX=10090 GN=Pex11b PE=1 SV=1	17.402	16.6023	115.7	98.4	104.8	80.4	104.5	87	83.4	97.1	120.1	108.5
Q9CQC8	Maspardin OS=Mus musculus OX=10090 GN=Spg21 PE=1 SV=1	17.382	18.8312	92.3	85.3	95.6	79.2	99.9	96.9	107.1	112.8	122.7	108.1
Q91YU8	Suppressor of SWI4 1 homolog OS=Mus musculus OX=10090 GN=Ppan PE=1 SV=2	17.202	7.87234	89.8	78.1	107.9	105.8	88.2	99.8	104	100.9	104.6	120.9
Q6NXN1	SUZ domain-containing protein 1 OS=Mus musculus OX=10090 GN=Szrd1 PE=1 SV=1	17.2	28.9474	105.5	103.3	100.2	100.7	88.6	89.2	91.6	97.9	111.2	111.8
O54692	Centromere/kinetochore protein zw10 homolog OS=Mus musculus OX=10090 GN=Zw10 PE=1 SV=3	17.178	8.34403	88.4	107.5	82.5	103.6	109.3	96.4	92.7	107.8	114	97.8
P49717	DNA replication licensing factor MCM4 OS=Mus musculus OX=10090 GN=Mcm4 PE=1 SV=1	17.118	5.45244	85.2	81	92.9	102.3	77.9	126.7	94.9	115.3	101.4	122.4
Q9Z0E8	Solute carrier family 22 member 5 OS=Mus musculus OX=10090 GN=Slc22a5 PE=1 SV=1	17.052	7.18133	143.1	92.4	134.3	86.4	133.3	72.1	82.9	82.3	96.4	76.7
P08122	Collagen alpha-2(IV) chain OS=Mus musculus OX=10090 GN=Col4a2 PE=1 SV=4	16.915	3.10486	81.3	89.2	92.1	88.9	90.1	110.8	100.5	116	112.2	118.9
P61148	Fibroblast growth factor 1 OS=Mus musculus OX=10090 GN=Fgf1 PE=1 SV=1	16.856	25.1613	109.8	117.3	145.1	138.5	123.7	79.1	70.8	70.7	67	77.9
P49817	Caveolin-1 OS=Mus musculus OX=10090 GN=Cav1 PE=1 SV=1	16.733	23.0337	106.6	78.3	89.7	75.2	107.2	84.9	117.7	103	119.9	117.7
Q3UPY5	Beta-galactosidase-1-like protein 2 OS=Mus musculus OX=10090 GN=Glb1l2 PE=1 SV=1	16.727	6.13208	112	108.9	93.4	100.7	117.7	81.9	89.9	94.1	103.1	98.4
Q9CPW9	Methionine aminopeptidase 1D, mitochondrial OS=Mus musculus OX=10090 GN=Metap1d PE=2 SV=1	16.716	13.7313	92.3	116.1	104	100.7	107.4	97.3	102.8	87.5	92.3	99.6
Q99JP6	Homer protein homolog 3 OS=Mus musculus OX=10090 GN=Homer3 PE=1 SV=2	16.66	12.3596	79.3	94.6	94.9	104.4	93	114.5	107.8	108.9	98.3	104.3
P49962	Signal recognition particle 9 kDa protein OS=Mus musculus OX=10090 GN=Srp9 PE=1 SV=2	16.565	37.2093	108	102.1	102.1	102.6	97.7	94.4	100.9	93.3	100.6	98.1
Q9JJW0	Peroxisomal membrane protein 4 OS=Mus musculus OX=10090 GN=Pxmp4 PE=1 SV=3	16.519	14.6226	117.6	94.2	120	98.9	105.4	90.5	92.8	92.7	96.3	91.5
P11152	Lipoprotein lipase OS=Mus musculus OX=10090 GN=Lpl PE=1 SV=3	16.473	8.64979	175.9	97.9	108.8	138.3	116.8	82.2	55.3	72.8	87.3	64.6
Q6ZPJ3	(E3-independent) E2 ubiquitin-conjugating enzyme UBE2O OS=Mus musculus OX=10090 GN=Ube2o PE=1 SV=3	16.259	4.42547	94.9	85.8	90.7	91.9	79.8	111	101.3	115.5	107.6	121.6
Q45VK7	Cytoplasmic dynein 2 heavy chain 1 OS=Mus musculus OX=10090 GN=Dync2h1 PE=1 SV=1	16.237	1.43985	79.7	83.5	88.7	85.6	100	98.2	87.4	120.8	136.2	120
Q8BGY7	Protein FAM210A OS=Mus musculus OX=10090 GN=Fam210a PE=1 SV=1	16.212	14.2857	180.3	94.4	111.8	126	118.5	71.2	81.2	70.6	72.6	73.5
Q9JJC6	RILP-like protein 1 OS=Mus musculus OX=10090 GN=Rilpl1 PE=1 SV=1	16.208	11.0837	82.5	84.5	82.8	98.5	79.8	114.7	104.9	126.3	108.9	117.1
Q99MU3	Double-stranded RNA-specific adenosine deaminase OS=Mus musculus OX=10090 GN=Adar PE=1 SV=2	16.202	3.39559	81.3	88.4	76.3	81.7	79.4	122	109.2	112.8	125	123.9
Q9R0B6	Laminin subunit gamma-3 OS=Mus musculus OX=10090 GN=Lamc3 PE=1 SV=2	16.143	2.90955	88.9	128.7	104.5	136.2	92	96.7	77.1	98.9	73.9	103
Q9D061	Acyl-CoA-binding domain-containing protein 6 OS=Mus musculus OX=10090 GN=Acbd6 PE=1 SV=2	16.114	13.4752	98.5	81.9	80.4	88.5	86.7	116.2	114	107	113.1	113.7
Q6P549	Phosphatidylinositol 3,4,5-trisphosphate 5-phosphatase 2 OS=Mus musculus OX=10090 GN=Inppl1 PE=1 SV=1	16.091	5.09149	89.6	92.3	94.4	97.3	96.5	109.7	105.9	105.1	102.4	106.8
Q8K0V4	CCR4-NOT transcription complex subunit 3 OS=Mus musculus OX=10090 GN=Cnot3 PE=1 SV=1	15.984	5.19308	93.9	98.7	101.8	111.8	93.8	104.7	101.4	97.1	98.3	98.4
Q3UMY5	Echinoderm microtubule-associated protein-like 4 OS=Mus musculus OX=10090 GN=Eml4 PE=1 SV=1	15.928	5.46559	90.8	99.3	94.2	99.7	93	105.8	92.5	112.9	105.2	106.6
Q9QZR0	E3 ubiquitin-protein ligase RNF25 OS=Mus musculus OX=10090 GN=Rnf25 PE=1 SV=2	15.837	8.99123	97.7	92.2	100.8	94.5	94.7	105	112.4	90.9	116	95.9
Q8BYW9	EGF domain-specific O-linked N-acetylglucosamine transferase OS=Mus musculus OX=10090 GN=Eogt PE=1 SV=1	15.804	7.02087	113.8	88.7	87.7	86	103.2	94.7	95.1	113.4	113.3	104.1
Q8BMQ2	General transcription factor 3C polypeptide 4 OS=Mus musculus OX=10090 GN=Gtf3c4 PE=1 SV=2	15.755	5.75275	153.2	116.1	155.6	71.8	106.5	66.4	88.5	74.9	87.7	79.3
Q3U0M1	Trafficking protein particle complex subunit 9 OS=Mus musculus OX=10090 GN=Trappc9 PE=1 SV=2	15.746	3.91986	97.1	77.6	90.7	85.4	100.4	94.1	95.8	116.7	131.1	111
P21570	Angiogenin OS=Mus musculus OX=10090 GN=Ang PE=1 SV=1	15.73	26.8966	79.8	100	71.7	88.9	76.5	130.7	133.9	106.2	110.2	102.2
Q9ERA6	Tuftelin-interacting protein 11 OS=Mus musculus OX=10090 GN=Tfip11 PE=1 SV=1	15.685	5.96659	83.4	83.8	87.7	90.9	97.5	118.1	100.9	105.1	121.6	110.9
Q61151	Serine/threonine-protein phosphatase 2A 56 kDa regulatory subunit epsilon isoform OS=Mus musculus OX=10090 GN=Ppp2r5e PE=1 SV=3	15.664	9.63597	88.8	81.5	95.5	79.1	114.1	81.3	110.2	115.8	125.6	108.2
P32848	Parvalbumin alpha OS=Mus musculus OX=10090 GN=Pvalb PE=1 SV=3	15.653	45.4545	125.6	90.2	103.4	85.6	91.4	82.5	102.5	100.9	85.5	132.2
Q8BTW9	Serine/threonine-protein kinase PAK 4 OS=Mus musculus OX=10090 GN=Pak4 PE=1 SV=1	15.588	7.4199	93.2	76	96.6	80.6	99.3	97.7	108.8	116.9	105.4	125.6
P60521	Gamma-aminobutyric acid receptor-associated protein-like 2 OS=Mus musculus OX=10090 GN=Gabarapl2 PE=1 SV=1	15.586	43.5897	118.1	117.2	95.7	107.2	84.2	82.5	86.1	106.8	98	104.1
Q9EP53	Hamartin OS=Mus musculus OX=10090 GN=Tsc1 PE=1 SV=1	15.55	3.44531	82.2	80.4	93.3	100.4	95	112.7	102.3	108	110.2	115.5
O70152	Dolichol-phosphate mannosyltransferase subunit 1 OS=Mus musculus OX=10090 GN=Dpm1 PE=1 SV=1	15.537	15.7692	112.7	94.8	95.2	85.8	112.3	76.8	90.8	109.8	117.4	104.4
Q9D6L8	Peptidyl-prolyl cis-trans isomerase-like 3 OS=Mus musculus OX=10090 GN=Ppil3 PE=1 SV=1	15.509	31.0559	63.8	82.6	74.3	95	71.9	138.5	113	125.5	109.4	125.8
P46735	Unconventional myosin-Ib OS=Mus musculus OX=10090 GN=Myo1b PE=1 SV=3	15.482	4.06504	92	97.8	93.9	83.5	98.1	103.5	100.3	107.3	117.7	105.9
Q6P5G6	UBX domain-containing protein 7 OS=Mus musculus OX=10090 GN=Ubxn7 PE=1 SV=2	15.261	9.85011	101.9	111.6	112.1	106.1	103.2	90	104.4	88.3	90.1	92.3
Q9Z0V7	Mitochondrial import inner membrane translocase subunit Tim17-B OS=Mus musculus OX=10090 GN=Timm17b PE=1 SV=1	15.173	25.5814	120.2	90.5	108.5	92.3	117.4	76.4	96.1	93.2	105.8	99.6
Q9CWR1	WD repeat-containing protein 73 OS=Mus musculus OX=10090 GN=Wdr73 PE=1 SV=1	15.085	13.2075	72.1	75.8	80.7	88.6	88.4	103.2	95.7	140.7	95.8	158.9
Q99LI2	Chloride channel CLIC-like protein 1 OS=Mus musculus OX=10090 GN=Clcc1 PE=1 SV=1	15.046	8.34879	100.4	86.8	96.4	87.4	104.1	89.7	92.3	110.7	121.3	111
Q9D735	Telomerase RNA component interacting RNase OS=Mus musculus OX=10090 GN=Trir PE=1 SV=1	15.033	16.185	93.2	97.1	102.2	112.4	85.6	109.2	109.9	94	92.7	103.9
Q99MB2	Mitochondrial fission regulator 1 OS=Mus musculus OX=10090 GN=Mtfr1 PE=1 SV=1	14.921	12.8049	103.3	89	100.3	102.8	102	85.4	95.1	101.3	110.2	110.7
Q80ZK9	WD and tetratricopeptide repeats protein 1 OS=Mus musculus OX=10090 GN=Wdtc1 PE=1 SV=1	14.793	9.01034	91.4	76.2	87.1	101.4	89.6	108.2	101.3	111.3	108.4	125.1
Q8VDS8	Syntaxin-18 OS=Mus musculus OX=10090 GN=Stx18 PE=1 SV=2	14.775	12.5749	82.3	85.8	82.7	87.7	98.6	99.9	93.8	123.4	122.2	123.5
Q9CWH5	tRNA (guanine(10)-N2)-methyltransferase homolog OS=Mus musculus OX=10090 GN=Trmt11 PE=1 SV=1	14.738	8.69565	91.5	89.7	98.3	91	108.6	85.6	97.8	99.9	111.7	125.9
A3KGB4	TBC1 domain family member 8B OS=Mus musculus OX=10090 GN=Tbc1d8b PE=1 SV=1	14.628	3.7702	97.4	93.2	99.7	95	105.6	94.5	97.9	102.5	108.6	105.7
Q5U5M8	Biogenesis of lysosome-related organelles complex 1 subunit 3 OS=Mus musculus OX=10090 GN=Bloc1s3 PE=1 SV=1	14.594	20	97.1	99.3	95.8	102.4	100.4	104	97.1	99.9	97.9	106.2
Q2YDW2	Protein misato homolog 1 OS=Mus musculus OX=10090 GN=Msto1 PE=1 SV=1	14.583	6.29496	92.3	95.1	96.9	98.4	96	97.1	91.9	108.9	114.8	108.6
Q9JJN5	Carboxypeptidase N catalytic chain OS=Mus musculus OX=10090 GN=Cpn1 PE=1 SV=1	14.539	7.43982	75.5	105	88.8	92.4	89.2	128.1	128.7	91.1	92.9	108.3
Q8C0L6	Peroxisomal N(1)-acetyl-spermine/spermidine oxidase OS=Mus musculus OX=10090 GN=Paox PE=1 SV=3	14.438	7.14286	101.7	98.8	101.2	90.3	98.3	93.1	92.8	102.8	111	110.2
Q9QXF8	Glycine N-methyltransferase OS=Mus musculus OX=10090 GN=Gnmt PE=1 SV=3	14.369	15.6997	77.2	133.3	126.7	103.4	106.8	85.4	82.8	109.2	76.9	98.3
Q3UR70	Transforming growth factor-beta receptor-associated protein 1 OS=Mus musculus OX=10090 GN=Tgfbrap1 PE=1 SV=1	14.333	7.32558	111.1	78.2	103.4	98.9	104.4	92.2	80.8	105.4	120.7	105
Q69Z99	Zinc finger protein 512 OS=Mus musculus OX=10090 GN=Znf512 PE=2 SV=2	14.307	6.9395	102.6	97.2	97.4	91.9	96.2	94.9	105.3	100	101.9	112.5
Q9WUB6	Chloride channel protein ClC-Kb OS=Mus musculus OX=10090 GN=Clcnkb PE=1 SV=2	14.105	9.17031	106.1	87.2	106.9	73.2	124.7	77.5	100.2	93.7	126.4	104.1
Q08288	Cell growth-regulating nucleolar protein OS=Mus musculus OX=10090 GN=Lyar PE=1 SV=2	14.084	11.0825	88.7	93.1	94.8	107.5	80.8	113.3	115.5	102.9	93.4	110
Q9CYV5	Transmembrane protein 135 OS=Mus musculus OX=10090 GN=Tmem135 PE=2 SV=1	13.839	10.262	107.3	81.1	92.1	86.6	94.1	105.6	83.7	113.8	114.4	121.3
P70388	DNA repair protein RAD50 OS=Mus musculus OX=10090 GN=Rad50 PE=1 SV=1	13.83	3.8872	89.4	96.9	97.9	96.5	106.7	101.1	93.4	110.9	103.4	103.8
Q9DCJ1	Target of rapamycin complex subunit LST8 OS=Mus musculus OX=10090 GN=Mlst8 PE=1 SV=1	13.811	13.1902	78.6	90.7	85.5	96.3	112.6	118.3	114.8	95.7	105.4	102.1
Q9CY34	NEDD8-conjugating enzyme UBE2F OS=Mus musculus OX=10090 GN=Ube2f PE=1 SV=1	13.811	24.8649	89.2	94.8	97.2	103.8	100.9	105.8	97.1	97.9	106.2	107
Q9R1E6	Ectonucleotide pyrophosphatase/phosphodiesterase family member 2 OS=Mus musculus OX=10090 GN=Enpp2 PE=1 SV=3	13.791	4.75638	102.6	101.9	88.5	123.2	95.6	106.6	90.8	106.7	83.2	100.9
Q8R3Q0	Store-operated calcium entry-associated regulatory factor OS=Mus musculus OX=10090 GN=Saraf PE=1 SV=2	13.771	9.58084	108.5	104	70.6	85.3	106.1	74.1	107.6	118.8	119.1	105.9
Q9QWI6	SRC kinase signaling inhibitor 1 OS=Mus musculus OX=10090 GN=Srcin1 PE=1 SV=2	13.532	2.8	90.8	89.9	98.2	96.1	115.4	104.6	110.1	91.1	108.6	95.1
Q9R0P6	Signal peptidase complex catalytic subunit SEC11A OS=Mus musculus OX=10090 GN=Sec11a PE=1 SV=1	13.51	18.9944	96.3	84.3	94.9	87.3	100.7	93	94.8	110.8	122.5	115.3
Q8BGN2	UPF0462 protein C4orf33 homolog OS=Mus musculus OX=10090 GN=D3Ertd751e PE=2 SV=1	13.339	17.7083	93.4	111.8	103.7	114.1	100.3	103.5	98.7	88.9	92.5	93
Q9CQL5	39S ribosomal protein L18, mitochondrial OS=Mus musculus OX=10090 GN=Mrpl18 PE=1 SV=1	13.336	22.7778	106.6	110.1	107.8	110.9	94.7	116	84.9	95.7	80.4	92.8
Q9R097	Kunitz-type protease inhibitor 1 OS=Mus musculus OX=10090 GN=Spint1 PE=1 SV=2	13.288	8.28402	79.1	85.3	77.4	88.4	83.8	115.7	97.8	131.9	115.6	125.2
Q04592	Proprotein convertase subtilisin/kexin type 5 OS=Mus musculus OX=10090 GN=Pcsk5 PE=1 SV=3	13.227	2.45072	78	74	76.7	94.7	83.9	99.6	94.2	124.5	127	147.5
P63166	Small ubiquitin-related modifier 1 OS=Mus musculus OX=10090 GN=Sumo1 PE=1 SV=1	13.227	31.6832	97.1	108.3	99.5	97.5	94.2	103.4	111.3	95.2	97.3	96.2
Q91WU2	Solute carrier family 22 member 7 OS=Mus musculus OX=10090 GN=Slc22a7 PE=1 SV=1	13.217	6.2963	121.1	95.5	131.8	115.1	138	62.6	46.5	92.8	120.2	76.2
Q9D8Z1	Activating signal cointegrator 1 complex subunit 1 OS=Mus musculus OX=10090 GN=Ascc1 PE=1 SV=1	13.177	11.7978	88.3	87.3	95.5	95.2	93.9	102.9	102	110.1	115.3	109.5
Q9D279	Mitotic interactor and substrate of PLK1 OS=Mus musculus OX=10090 GN=Misp PE=1 SV=1	13.151	7.09877	119.3	81.9	70.3	119.8	64.1	102	90.5	111.1	113.7	127.2
Q8K0C8	Cytochrome c oxidase assembly protein COX19 OS=Mus musculus OX=10090 GN=Cox19 PE=1 SV=1	13.141	42.3913	117.8	112.8	126.1	103.7	114	88.5	85.3	82.6	83.5	85.6
O55013	Trafficking protein particle complex subunit 3 OS=Mus musculus OX=10090 GN=Trappc3 PE=1 SV=1	13.124	17.2222	108.1	88	88.1	87.3	95.5	90.7	98.8	114.7	115.5	113.4
O35453	Serine protease hepsin OS=Mus musculus OX=10090 GN=Hpn PE=1 SV=3	13.097	9.17431	105.5	91.4	100.4	95	101.9	82.6	76.7	110.8	119.2	116.6
P23950	mRNA decay activator protein ZFP36L1 OS=Mus musculus OX=10090 GN=Zfp36l1 PE=1 SV=1	13.069	7.39645	49.6	79.8	48.1	105.8	124.4	95.1	152.9	84	134	126.3
Q9Z1K6	E3 ubiquitin-protein ligase ARIH2 OS=Mus musculus OX=10090 GN=Arih2 PE=1 SV=1	12.894	8.73984	83.7	86.9	87.6	83.1	89.7	101.1	105.5	115	129.1	118.4
P14069	Protein S100-A6 OS=Mus musculus OX=10090 GN=S100a6 PE=1 SV=3	12.857	39.3258	66.4	74.1	81.5	102.4	66.9	123.9	153	157.3	95.2	79.4
P35330	Intercellular adhesion molecule 2 OS=Mus musculus OX=10090 GN=Icam2 PE=1 SV=1	12.84	13.7184	108.7	95.6	93.2	81.1	96.1	94.4	98.1	108.2	119.5	105
Q922Q4	Pyrroline-5-carboxylate reductase 2 OS=Mus musculus OX=10090 GN=Pycr2 PE=1 SV=1	12.812	13.75	96.2	92	103.2	105.7	104.8	96	92.2	103.5	104.8	101.6
P56382	ATP synthase subunit epsilon, mitochondrial OS=Mus musculus OX=10090 GN=Atp5f1e PE=1 SV=2	12.775	57.6923	110.3	125	111.2	110	104.5	95	88.3	88.7	79	87.9
Q8VE11	Myotubularin-related protein 6 OS=Mus musculus OX=10090 GN=Mtmr6 PE=1 SV=1	12.763	5.34846	102.8	91.7	104.3	80.7	104.4	81.1	89.3	112.2	121.7	111.7
Q6KCD5	Nipped-B-like protein OS=Mus musculus OX=10090 GN=Nipbl PE=1 SV=1	12.684	1.75125	79.2	87.1	87.3	93.2	88.1	116.1	107.2	112.2	119.6	110
Q8VCS3	Glycosaminoglycan xylosylkinase OS=Mus musculus OX=10090 GN=Fam20b PE=1 SV=1	12.677	8.31296	118.8	101.7	108.4	96.5	104	86.6	86.5	97.7	102.8	97
B1AVZ0	Uracil phosphoribosyltransferase homolog OS=Mus musculus OX=10090 GN=Uprt PE=1 SV=1	12.477	10.3226	76.2	92.2	80.3	101.2	90	115.1	95.2	119.7	110.2	119.8
Q8CCS6	Polyadenylate-binding protein 2 OS=Mus musculus OX=10090 GN=Pabpn1 PE=1 SV=3	12.435	10.596	105.9	102.2	104.9	113.1	88.5	109.1	104.3	88.7	89.9	93.4
P62313	U6 snRNA-associated Sm-like protein LSm6 OS=Mus musculus OX=10090 GN=Lsm6 PE=1 SV=1	12.399	32.5	78.1	109.3	90.1	107.8	83.6	124.1	102.3	106.2	93.2	105.1
Q8BX09	Retinoblastoma-binding protein 5 OS=Mus musculus OX=10090 GN=Rbbp5 PE=1 SV=2	12.056	6.69145	96.3	101.3	92.4	99.6	100.4	99.9	99.6	104.8	102.8	102.9
P35290	Ras-related protein Rab-24 OS=Mus musculus OX=10090 GN=Rab24 PE=1 SV=2	11.969	15.2709	122.3	102.6	106.7	89.5	118.9	75.7	88.4	96.5	101.4	98
Q6P1H6	Ankyrin repeat and LEM domain-containing protein 2 OS=Mus musculus OX=10090 GN=Ankle2 PE=1 SV=2	11.925	3.21577	98	87.2	93.9	95.8	86.3	107.1	109.7	101.2	108.2	112.7
Q8K2T1	NmrA-like family domain-containing protein 1 OS=Mus musculus OX=10090 GN=Nmral1 PE=1 SV=1	11.922	14.2395	85.7	100.4	93.4	103.9	96.1	115.5	100.6	103.9	100	100.3
Q921C5	Protein bicaudal D homolog 2 OS=Mus musculus OX=10090 GN=Bicd2 PE=1 SV=1	11.874	8.41463	86.6	94.8	95.3	90.5	102.6	106.6	102.2	108	101.2	112.3
Q9QZC7	Pleckstrin homology domain-containing family B member 2 OS=Mus musculus OX=10090 GN=Plekhb2 PE=1 SV=1	11.818	18.552	107.3	96.5	107.4	111.9	113.4	85.2	86.2	95.9	94.4	101.8
Q8QZV7	Integrator complex subunit 13 OS=Mus musculus OX=10090 GN=IntS13 PE=1 SV=2	11.786	5.19126	79.5	100.1	84	105.2	95.5	104.5	108.5	114.1	107.1	101.5
Q31125	Zinc transporter SLC39A7 OS=Mus musculus OX=10090 GN=Slc39a7 PE=1 SV=2	11.643	9.03361	115.1	94.6	97.5	74.4	110.6	78	107.3	97.9	123.5	101.1
Q9D6Y4	BLOC-1-related complex subunit 8 OS=Mus musculus OX=10090 GN=Borcs8 PE=1 SV=1	11.486	40.8333	89.5	97.3	95.7	105.1	93.9	110.3	99.4	101.4	99.7	107.8
Q8C7V8	Coiled-coil domain-containing protein 134 OS=Mus musculus OX=10090 GN=Ccdc134 PE=1 SV=1	11.304	17.9039	101.7	106.6	101.9	97.3	105.8	99.3	95.3	90.8	99.6	101.7
Q6PHQ8	N-alpha-acetyltransferase 35, NatC auxiliary subunit OS=Mus musculus OX=10090 GN=Naa35 PE=1 SV=1	11.284	5.37931	117.2	81.4	101.2	94.9	99.5	88.7	83.9	105.9	114.3	113
Q99ME9	GTP-binding protein 4 OS=Mus musculus OX=10090 GN=Gtpbp4 PE=1 SV=3	11.221	5.67823	86.6	88.8	96.6	92.1	92.1	103.4	108.9	105.7	107.9	117.9
Q3UUQ7	GPI inositol-deacylase OS=Mus musculus OX=10090 GN=Pgap1 PE=1 SV=3	10.999	3.47072	110.7	88.5	101.6	81.3	118.4	80.6	103.8	102.1	112.2	100.8
Q9CPW7	Zinc finger matrin-type protein 2 OS=Mus musculus OX=10090 GN=Zmat2 PE=2 SV=1	10.902	12.0603	92.1	104	104.8	104.9	95.7	105.6	106.9	90.2	94.7	101.2
Q8K2H1	Periphilin-1 OS=Mus musculus OX=10090 GN=Pphln1 PE=1 SV=1	10.892	8.39895	89.6	89.9	90.9	96.8	86.4	121.8	97	105	99.8	122.8
A2TJV2	Paralemmin-3 OS=Mus musculus OX=10090 GN=Palm3 PE=1 SV=1	10.789	4.08719	76	92.9	93.8	111.4	95	112.1	98.2	110.3	97.6	112.7
Q8CI33	CWF19-like protein 1 OS=Mus musculus OX=10090 GN=Cwf19l1 PE=1 SV=2	10.627	6.51769	83	94.4	100.7	96.5	102.9	106.1	110.2	102.6	101.3	102.2
Q91YE3	Egl nine homolog 1 OS=Mus musculus OX=10090 GN=Egln1 PE=1 SV=2	10.449	7.5	96.8	91.7	113.1	104.3	110.8	89.5	99.9	92	103.2	98.8
Q8BVA5	Lipid droplet-associated hydrolase OS=Mus musculus OX=10090 GN=Ldah PE=1 SV=1	9.943	21.7791	123.5	95.6	113.9	97	109.9	87	91.7	94.3	93	94.2
Q8C0D4	Rho GTPase-activating protein 12 OS=Mus musculus OX=10090 GN=Arhgap12 PE=1 SV=2	9.891	6.08592	97.3	107.6	102.4	100.4	99	118.2	112	86.4	79.7	97.1
Q640N1	Adipocyte enhancer-binding protein 1 OS=Mus musculus OX=10090 GN=Aebp1 PE=1 SV=1	9.846	3.45745	86.4	96	91.7	92.2	105.6	118.3	100.1	100.5	100.9	108.3
P97868	E3 ubiquitin-protein ligase RBBP6 OS=Mus musculus OX=10090 GN=Rbbp6 PE=1 SV=5	9.451	1.67598	102.2	98.1	104.8	102	83.7	114.5	101	93.2	96.8	103.8
P58059	28S ribosomal protein S21, mitochondrial OS=Mus musculus OX=10090 GN=Mrps21 PE=1 SV=1	9.319	33.3333	119.4	121.9	119.1	116.7	100.1	92.3	72.7	86.5	81.5	89.8
O35114	Lysosome membrane protein 2 OS=Mus musculus OX=10090 GN=Scarb2 PE=1 SV=3	9.296	7.11297	83.9	69.6	67.4	58.6	84.3	101.6	127.5	130.2	145.8	131.1
Q9ER38	Torsin-3A OS=Mus musculus OX=10090 GN=Tor3a PE=1 SV=2	9.229	11.4286	68	79.2	70.5	71.2	70.7	114.4	122.7	134.9	139.6	128.8
O35473	Nuclear nucleic acid-binding protein C1D OS=Mus musculus OX=10090 GN=C1d PE=1 SV=1	8.956	22.695	85.9	96.6	90.1	95.1	89.4	117.2	113.7	103.8	101.9	106.4
Q9CW79	Golgin subfamily A member 1 OS=Mus musculus OX=10090 GN=Golga1 PE=1 SV=2	8.944	5.93668	101.2	93.7	101.8	98.7	93.7	104.9	93.8	96.6	107.9	107.8
Q61827	Transcription factor MafK OS=Mus musculus OX=10090 GN=Mafk PE=1 SV=1	8.903	20.5128	55	68.9	69.1	67.9	61.3	171.6	143	124.4	114.4	124.3
Q8R143	Pituitary tumor-transforming gene 1 protein-interacting protein OS=Mus musculus OX=10090 GN=Pttg1ip PE=1 SV=1	8.767	18.3908	113.1	78.6	106.4	75	106.1	86.5	98.5	101.7	125.5	108.6
Q9JHH6	Carboxypeptidase B2 OS=Mus musculus OX=10090 GN=Cpb2 PE=1 SV=1	8.472	8.53081	58	68.7	48.7	61	55	252	173.8	87.6	76.1	119.3
Q9D8B7	Junctional adhesion molecule C OS=Mus musculus OX=10090 GN=Jam3 PE=1 SV=2	8.256	10.9677	105.3	82.1	91.7	80.5	99.3	84.6	100.5	115.2	126.6	114.1
Q8BQM4	HEAT repeat-containing protein 3 OS=Mus musculus OX=10090 GN=Heatr3 PE=1 SV=1	8.248	7.65832	88.6	92.8	91.5	91.9	96.3	97	90.1	114.4	122.2	115.2
Q9WV89	Syntaxin-binding protein 4 OS=Mus musculus OX=10090 GN=Stxbp4 PE=1 SV=1	8.228	5.386	95.5	101.3	108.2	116.1	94.5	110.5	83.3	98.4	91.1	101.1
Q9Z307	Inward rectifier potassium channel 16 OS=Mus musculus OX=10090 GN=Kcnj16 PE=1 SV=2	7.307	8.35322	144.1	91	141.2	89	127.4	66.7	71.5	82.9	98.3	87.8
Q8BM88	Cathepsin O OS=Mus musculus OX=10090 GN=Ctso PE=2 SV=1	7.022	12.8205	93.4	106.8	97.9	105.6	98.9	98.1	92.6	102.4	98.1	106.2
Q80TI0	Protein Aster-B OS=Mus musculus OX=10090 GN=Gramd1b PE=1 SV=2	6.813	4.60705	101.8	88.7	100.6	101.1	97	92.1	93.1	85.3	102.1	138.3
Q63836	Selenium-binding protein 2 OS=Mus musculus OX=10090 GN=Selenbp2 PE=1 SV=2	554.797	83.2627	114.2	87.5	76.2	115.3	117	94.9	86	105.5	108.4	95
P84078	ADP-ribosylation factor 1 OS=Mus musculus OX=10090 GN=Arf1 PE=1 SV=2	283.217	83.4254	94.9	105.9	91.9	93.5	98	95.3	98.8	107.6	110.4	103.7
O55137	Acyl-coenzyme A thioesterase 1 OS=Mus musculus OX=10090 GN=Acot1 PE=1 SV=1	276.054	64.9165	91	87.7	111	97.3	89.4	115.4	107.8	91.9	96.3	112.1
Q62095	ATP-dependent RNA helicase DDX3Y OS=Mus musculus OX=10090 GN=Ddx3y PE=1 SV=2	194.061	43.1611	81.9	88.2	97.3	91.9	92.6	100.7	103.7	114.8	114.5	114.5
P61750	ADP-ribosylation factor 4 OS=Mus musculus OX=10090 GN=Arf4 PE=1 SV=2	174.677	81.1111	104.8	87.8	87.9	73.3	97.3	82.2	107	117.4	129.9	112.5
Q00898	Alpha-1-antitrypsin 1-5 OS=Mus musculus OX=10090 GN=Serpina1e PE=1 SV=1	171.126	31.9613	72.4	70.3	85.2	125.4	87.9	179	117.1	84.7	71.7	106.3
P07759	Serine protease inhibitor A3K OS=Mus musculus OX=10090 GN=Serpina3k PE=1 SV=2	167.217	27.2727	56.1	97.2	63.5	98.6	90.8	162.6	123.2	98.5	71.4	138.1
P62835	Ras-related protein Rap-1A OS=Mus musculus OX=10090 GN=Rap1a PE=1 SV=1	150.646	73.913	100.7	99.2	93	98.3	109.4	102.8	110.7	97.5	92	96.4
Q9CS42	Ribose-phosphate pyrophosphokinase 2 OS=Mus musculus OX=10090 GN=Prps2 PE=1 SV=4	144.015	42.4528	89.5	104.7	99.2	106.9	109.4	96.8	94.5	104.2	99	95.9
Q9QYR7	Acyl-coenzyme A thioesterase 3 OS=Mus musculus OX=10090 GN=Acot3 PE=1 SV=1	126.268	41.8981	95.2	111.8	131.1	100.9	104.9	99.2	97.1	80.9	85	93.9
O35343	Importin subunit alpha-3 OS=Mus musculus OX=10090 GN=Kpna4 PE=1 SV=1	124.928	31.6699	103.2	96.3	96.4	104.8	103.4	91.3	96.7	107.1	100.1	100.6
Q91VM5	RNA binding motif protein, X-linked-like-1 OS=Mus musculus OX=10090 GN=Rbmxl1 PE=2 SV=1	115.112	43.5567	94.3	117.7	110.5	104.1	78.8	103.6	104.4	91.8	97.4	97.4
Q91WK5	Glycine cleavage system H protein, mitochondrial OS=Mus musculus OX=10090 GN=Gcsh PE=1 SV=2	110.806	53.5294	104.1	130	124.5	112.8	104.3	84.9	86.7	87.4	79.3	86.1
O35344	Importin subunit alpha-4 OS=Mus musculus OX=10090 GN=Kpna3 PE=1 SV=1	105.596	25.144	103.4	89.6	93.7	88.1	100.9	93.2	101.7	105.7	115.3	108.3
Q64339	Ubiquitin-like protein ISG15 OS=Mus musculus OX=10090 GN=Isg15 PE=1 SV=4	98.391	53.4161	32.7	79.8	34.7	38.5	38.2	128.9	162.5	146.4	179.4	158.9
Q9DCC7	Isochorismatase domain-containing protein 2B OS=Mus musculus OX=10090 GN=Isoc2b PE=1 SV=1	95.2	44.7619	115.5	106.6	103.8	115.3	107.4	98	91	90.5	86.7	85.2
Q9Z2W1	Serine/threonine-protein kinase 25 OS=Mus musculus OX=10090 GN=Stk25 PE=1 SV=2	94.928	22.77	81.9	90.1	84.5	86.5	88.5	120.9	110.4	114.1	115.3	107.7
P63001	Ras-related C3 botulinum toxin substrate 1 OS=Mus musculus OX=10090 GN=Rac1 PE=1 SV=1	93.889	45.3125	102.6	88.3	95.6	90.7	107.1	100	108	107.6	106.1	94.1
P24549	Retinal dehydrogenase 1 OS=Mus musculus OX=10090 GN=Aldh1a1 PE=1 SV=5	83.58	30.1397	87.6	94.1	110.3	83.7	95.4	101.5	117.9	105.1	99.5	105
P20065	Thymosin beta-4 OS=Mus musculus OX=10090 GN=Tmsb4x PE=1 SV=1	79.537	50	90.8	97	94.9	91.8	84.8	108.5	136.3	103	96.7	96.4
Q923B0	Gamma-glutamylaminecyclotransferase OS=Mus musculus OX=10090 GN=Ggact PE=1 SV=1	79.024	46.9799	91.7	93.5	99.3	108.2	105.6	107.2	97.2	102.3	97.5	97.5
Q8R2K1	Fucose mutarotase OS=Mus musculus OX=10090 GN=Fuom PE=1 SV=1	75.678	57.5163	96.4	103.2	105.1	103.6	96.9	104.4	106.6	97.2	92	94.6
Q5EBG8	Uncharacterized protein C1orf50 homolog OS=Mus musculus OX=10090 PE=1 SV=1	75.34	35.1759	102.5	91.4	99.8	108.9	90.9	110.1	87.2	104.4	102	102.7
P50543	Protein S100-A11 OS=Mus musculus OX=10090 GN=S100a11 PE=1 SV=1	75.327	77.551	70	90.4	79.4	93.5	78	137.2	89.6	159	83.5	119.5
Q8BP92	Reticulocalbin-2 OS=Mus musculus OX=10090 GN=Rcn2 PE=1 SV=1	73.151	26.25	96.4	118.4	103.5	111.8	93.3	100.7	94.9	102.1	85.9	92.9
Q8R5M8	Cell adhesion molecule 1 OS=Mus musculus OX=10090 GN=Cadm1 PE=1 SV=2	71.544	22.807	103.6	79	102.5	86.6	104.4	102.7	115.6	100.3	113.3	91.8
Q8K4M5	COMM domain-containing protein 1 OS=Mus musculus OX=10090 GN=Commd1 PE=1 SV=2	71.27	27.6596	91.1	103.5	95.8	109.5	96.5	106.8	94	105.5	97.7	99.6
Q61545	RNA-binding protein EWS OS=Mus musculus OX=10090 GN=Ewsr1 PE=1 SV=2	70.976	10.9924	89.5	111.6	102.4	111.9	90.6	112	88.8	102.5	91.9	99
Q9CQH0	PDZK1-interacting protein 1 OS=Mus musculus OX=10090 GN=Pdzk1ip1 PE=1 SV=1	70.579	34.2105	96.8	94.2	104.4	97.1	102	87.6	98.4	92.4	121.6	105.7
P20852	Cytochrome P450 2A5 OS=Mus musculus OX=10090 GN=Cyp2a5 PE=2 SV=1	69.693	35.6275	86.7	56.8	87.7	67.5	99.7	67.4	74.4	158.8	136.6	164.2
Q922U2	Keratin, type II cytoskeletal 5 OS=Mus musculus OX=10090 GN=Krt5 PE=1 SV=1	67.519	21.5517	160.8	58.7	78.7	178.2	77.4	90.5	108.2	76.3	105.9	65.3
P97822	Acidic leucine-rich nuclear phosphoprotein 32 family member E OS=Mus musculus OX=10090 GN=Anp32e PE=1 SV=2	65.995	30.3846	82.6	104.3	86.7	94.1	91.9	107.8	119.6	109.5	103.4	100.1
Q60972	Histone-binding protein RBBP4 OS=Mus musculus OX=10090 GN=Rbbp4 PE=1 SV=5	65.825	34.3529	76.4	89.2	82.2	96.6	82.8	152.8	127.7	101.8	86.8	103.6
P23198	Chromobox protein homolog 3 OS=Mus musculus OX=10090 GN=Cbx3 PE=1 SV=2	65.18	34.4262	83.9	109	97.6	117.3	90.3	109.8	97.3	99.7	105.1	90
O89086	RNA-binding protein 3 OS=Mus musculus OX=10090 GN=Rbm3 PE=1 SV=1	64.046	44.4444	58.8	77.2	68.9	68.7	66.7	127.2	130.4	132.4	117	152.8
Q9CZG9	PDZ domain-containing protein 11 OS=Mus musculus OX=10090 GN=Pdzd11 PE=1 SV=1	64.023	65	91.8	94.2	97.7	102.1	91.9	113.2	106.2	99.7	97.8	105.4
P62500	TSC22 domain family protein 1 OS=Mus musculus OX=10090 GN=Tsc22d1 PE=1 SV=2	62.669	6.59239	37.6	36.7	41	46.6	41.2	143.4	157.5	176	125.1	194.9
Q9CYI4	Putative RNA-binding protein Luc7-like 1 OS=Mus musculus OX=10090 GN=Luc7l PE=1 SV=2	61.004	29.1105	95.3	92.5	93.3	104.7	83.8	111.4	93.5	107.4	107.8	110.2
P70318	Nucleolysin TIAR OS=Mus musculus OX=10090 GN=Tial1 PE=1 SV=1	59.188	27.551	100.8	102.9	102.3	102.1	100.9	100.5	97.1	96	99.2	98.2
Q9R008	Mevalonate kinase OS=Mus musculus OX=10090 GN=Mvk PE=1 SV=1	59.16	20	94.2	105.7	106.5	109.3	108	96	87.3	96.4	97.7	99
Q8BGE6	Cysteine protease ATG4B OS=Mus musculus OX=10090 GN=Atg4b PE=1 SV=2	58.265	27.9898	90.9	93.4	99	97.9	99	105.7	95.2	105.5	109.5	103.8
Q9D0M0	Exosome complex exonuclease RRP42 OS=Mus musculus OX=10090 GN=Exosc7 PE=1 SV=2	57.778	26.8041	90.2	100	90.2	96.7	102.3	100.3	107.8	104.4	107.5	100.7
Q8C3K6	Sodium/glucose cotransporter 1 OS=Mus musculus OX=10090 GN=Slc5a1 PE=1 SV=1	57.096	9.32331	101.8	91	120.9	83.6	105.3	90.5	93.9	100.3	114.1	98.6
P01837	Immunoglobulin kappa constant OS=Mus musculus OX=10090 GN=Igkc PE=1 SV=2	56.124	57.9439	102	115	139.3	99.6	84.9	119.6	92.2	68.2	85.9	93.2
Q76LS9	Ubiquitin carboxyl-terminal hydrolase MINDY-1 OS=Mus musculus OX=10090 GN=Mindy1 PE=1 SV=1	55.032	16.8803	99.7	93	97.6	87.7	97.3	91.3	101	109.3	116	107.2
Q63810	Calcineurin subunit B type 1 OS=Mus musculus OX=10090 GN=Ppp3r1 PE=1 SV=3	54.83	49.4118	104.7	111.1	108.8	98.5	103.1	98.9	102.6	89.3	92.7	90.5
O35166	Golgi SNAP receptor complex member 2 OS=Mus musculus OX=10090 GN=Gosr2 PE=1 SV=2	54.503	33.9623	106.1	88.3	89.9	93.5	99	97.5	95.7	113.3	108.1	108.6
P50295	Arylamine N-acetyltransferase 2 OS=Mus musculus OX=10090 GN=Nat2 PE=1 SV=1	52.942	28.2759	112.4	80.5	85.4	84.7	101.9	89.6	90.9	125	121.4	108.3
Q99KF1	Transmembrane emp24 domain-containing protein 9 OS=Mus musculus OX=10090 GN=Tmed9 PE=1 SV=2	52.94	27.6596	101	95.5	86.4	81.1	95.6	93.3	96.9	116.8	119.4	114.1
Q8R395	COMM domain-containing protein 5 OS=Mus musculus OX=10090 GN=Commd5 PE=1 SV=1	52.53	22.7679	99.3	97.1	89.9	107.4	94.7	103.3	92.4	108.4	98.4	109.1
Q64735	Complement component receptor 1-like protein OS=Mus musculus OX=10090 GN=Cr1l PE=1 SV=1	52.043	15.735	97.3	92.7	89.8	90.2	105.5	96	105.2	107	112.3	104.1
Q923X4	Glutaredoxin-2, mitochondrial OS=Mus musculus OX=10090 GN=Glrx2 PE=1 SV=1	51.971	46.7949	66.7	84.3	70.9	68.6	71.7	87.5	121.3	126	165.3	137.7
P97760	DNA-directed RNA polymerase II subunit RPB3 OS=Mus musculus OX=10090 GN=Polr2c PE=1 SV=2	51.803	30.5455	82.2	92.2	94.3	99.4	83.9	120.8	111.2	110.6	99.2	106.1
Q9D071	MMS19 nucleotide excision repair protein homolog OS=Mus musculus OX=10090 GN=Mms19 PE=1 SV=1	50.555	8.82638	97.7	90.4	97.3	91.1	116.4	90.5	98.3	101.7	115	101.6
Q8CEI1	BolA-like protein 3 OS=Mus musculus OX=10090 GN=Bola3 PE=1 SV=1	49.746	51.8182	127	119.1	126.4	111.4	117.6	78.7	93.8	68.8	82.5	74.8
Q8VD75	Huntingtin-interacting protein 1 OS=Mus musculus OX=10090 GN=Hip1 PE=1 SV=2	49.408	8.74636	99.6	90.2	96.9	96.6	102.5	100.6	103	106.2	104.2	100.3
P50428	Arylsulfatase A OS=Mus musculus OX=10090 GN=Arsa PE=1 SV=2	48.55	21.5415	90.1	88.8	99	113.1	82.4	110.7	85.8	109.7	94.7	125.7
Q9DCL8	Protein phosphatase inhibitor 2 OS=Mus musculus OX=10090 GN=Ppp1r2 PE=1 SV=3	48.296	33.0097	86.2	93.2	91.4	103.6	84.4	117.1	107.2	105	102.7	109.2
Q99LT0	Protein dpy-30 homolog OS=Mus musculus OX=10090 GN=Dpy30 PE=1 SV=1	48.088	54.5455	82.7	98.7	92.3	97.7	85.7	126.9	111.4	104.2	97.4	103.1
Q2NL51	Glycogen synthase kinase-3 alpha OS=Mus musculus OX=10090 GN=Gsk3a PE=1 SV=2	47.005	26.3265	90.4	89.4	100.8	99.3	102.4	94.5	91.3	111.4	110.1	110.3
P83917	Chromobox protein homolog 1 OS=Mus musculus OX=10090 GN=Cbx1 PE=1 SV=1	45.785	31.3514	89.4	117.1	110.7	116.7	97.5	100.5	90.6	93.3	98.7	85.5
Q6NVE9	Protein phosphatase PTC7 homolog OS=Mus musculus OX=10090 GN=Pptc7 PE=1 SV=1	45.612	24.5161	98.1	107.7	108.8	100.3	105.2	96.2	100.1	90.8	97.8	95
Q9CQZ1	Heat shock factor-binding protein 1 OS=Mus musculus OX=10090 GN=Hsbp1 PE=1 SV=1	45.5	82.8947	104.3	102.9	108.7	107.8	100.8	101.1	101.2	89.6	90.3	93.4
Q9R078	5'-AMP-activated protein kinase subunit beta-1 OS=Mus musculus OX=10090 GN=Prkab1 PE=1 SV=2	45.458	30.7407	100.2	97.2	108	96.1	99.4	97	104.7	89.5	98.1	109.8
P43276	Histone H1.5 OS=Mus musculus OX=10090 GN=H1-5 PE=1 SV=2	44.831	31.8386	96.2	98.2	80.6	102	81.6	110.8	101.3	112	94.2	123
P08207	Protein S100-A10 OS=Mus musculus OX=10090 GN=S100a10 PE=1 SV=2	44.775	44.3299	57.6	71.9	72.5	83.7	83.1	159.6	119.3	130.4	114.1	107.9
Q8VI75	Importin-4 OS=Mus musculus OX=10090 GN=Ipo4 PE=1 SV=1	44.562	6.37708	87.5	87.9	85.6	84.4	95.2	85	106	112.9	134.4	121.1
Q9CR24	Nucleoside diphosphate-linked moiety X motif 8 OS=Mus musculus OX=10090 GN=Nudt8 PE=1 SV=1	43.651	26.6667	102.6	100.4	92.5	114.8	106.7	95.4	87.4	101.4	98.3	100.3
Q8R0J8	Probable gluconokinase OS=Mus musculus OX=10090 GN=Idnk PE=1 SV=2	43.306	45.1087	88.7	92.7	81.5	92.1	96.2	97.8	96.1	116.1	127.9	110.9
Q8VDT9	39S ribosomal protein L50, mitochondrial OS=Mus musculus OX=10090 GN=Mrpl50 PE=1 SV=2	43.177	45.283	103.1	116	113	108	109.2	88.5	94.6	82.9	94.3	90.4
Q9CQA1	Trafficking protein particle complex subunit 5 OS=Mus musculus OX=10090 GN=Trappc5 PE=1 SV=1	43.158	38.2979	113	94.4	104.1	81.3	109.6	86.4	106.5	95	108.8	100.9
Q3TSG4	RNA demethylase ALKBH5 OS=Mus musculus OX=10090 GN=Alkbh5 PE=1 SV=2	43.148	23.5443	76.5	94.3	92.3	97.9	90	115.7	101.6	111.1	109.6	111.2
Q8JZY2	COMM domain-containing protein 10 OS=Mus musculus OX=10090 GN=Commd10 PE=1 SV=1	42.919	31.6832	112.3	97.4	123	159.5	31	148.3	32.6	97.3	87.7	111.1
Q9D620	Rab11 family-interacting protein 1 OS=Mus musculus OX=10090 GN=Rab11fip1 PE=1 SV=2	42.878	11.1628	83.1	97.6	85.8	101.3	85.8	128.5	111.9	107.5	100.5	97.9
Q8VIM9	Immunity-related GTPase family Q protein OS=Mus musculus OX=10090 GN=Irgq PE=1 SV=1	41.89	14.4082	88.9	95.1	101.7	107.2	94.3	100.3	93.7	107.2	102.4	109.1
P84096	Rho-related GTP-binding protein RhoG OS=Mus musculus OX=10090 GN=Rhog PE=1 SV=1	41.849	39.7906	89	88.9	88.9	83.3	91	105.6	107.1	118	113.8	114.3
Q8K2K6	Arf-GAP domain and FG repeat-containing protein 1 OS=Mus musculus OX=10090 GN=Agfg1 PE=1 SV=2	41.737	12.8342	85.9	86.3	90	102	88.7	116	102.8	106.5	104.2	117.5
Q8R105	Vacuolar protein sorting-associated protein 37C OS=Mus musculus OX=10090 GN=Vps37c PE=1 SV=1	41.577	22.4432	85.4	87.9	99.5	98	92.8	111.7	104.9	103.2	108.2	108.4
O88653	Ragulator complex protein LAMTOR3 OS=Mus musculus OX=10090 GN=Lamtor3 PE=1 SV=1	41.253	81.4516	90.5	101.1	89.3	98.6	102.3	107.8	101.6	104.6	105.2	99
Q91Z96	BMP-2-inducible protein kinase OS=Mus musculus OX=10090 GN=Bmp2k PE=1 SV=1	41.158	8.34798	92.2	81.7	91.9	88.5	100	100.9	107.9	110.5	111.2	115.1
Q9D8Y1	Transmembrane protein 126A OS=Mus musculus OX=10090 GN=Tmem126a PE=1 SV=1	40.902	39.2857	116.5	96.2	112	98.5	112.3	85.5	92.3	97.6	91.4	97.7
Q8BHJ5	F-box-like/WD repeat-containing protein TBL1XR1 OS=Mus musculus OX=10090 GN=Tbl1xr1 PE=1 SV=1	40.317	17.7043	74.6	82.8	76.3	93.1	77.5	128.1	109.7	121.5	114	122.4
P97865	Peroxisomal targeting signal 2 receptor OS=Mus musculus OX=10090 GN=Pex7 PE=1 SV=1	40.312	24.8428	112.8	101.9	106.5	112	94.8	103.2	82.1	97	89.7	100.2
P11438	Lysosome-associated membrane glycoprotein 1 OS=Mus musculus OX=10090 GN=Lamp1 PE=1 SV=2	40.062	12.069	97.8	107.5	105.6	98.8	99.8	100.3	98.3	94.4	98.1	99.4
Q8C6E0	Cilia- and flagella-associated protein 36 OS=Mus musculus OX=10090 GN=Cfap36 PE=1 SV=1	40.043	21.5743	96.7	100.4	100.7	100.3	97.1	95	103.6	97.9	98.5	109.7
Q9D0B5	Thiosulfate sulfurtransferase/rhodanese-like domain-containing protein 3 OS=Mus musculus OX=10090 GN=Tstd3 PE=1 SV=1	39.985	34.3949	124.7	110.4	106.8	114.9	103.2	91.3	80.9	87.5	94.8	85.6
Q9D8S4	Oligoribonuclease, mitochondrial OS=Mus musculus OX=10090 GN=Rexo2 PE=1 SV=2	39.885	26.1603	83.2	105.4	95	107.1	83.1	107.8	96.1	106.9	106.7	108.7
Q8BH97	Reticulocalbin-3 OS=Mus musculus OX=10090 GN=Rcn3 PE=1 SV=1	39.866	18.5976	106.5	112.9	107.9	103.3	87.6	108.6	85.3	98.4	92.4	97.2
Q6ZPF4	Formin-like protein 3 OS=Mus musculus OX=10090 GN=Fmnl3 PE=1 SV=2	39.692	9.63035	86.8	95.4	93.8	90.6	100.5	102.4	97.2	117.2	107.4	108.7
O09111	NADH dehydrogenase [ubiquinone] 1 beta subcomplex subunit 11, mitochondrial OS=Mus musculus OX=10090 GN=Ndufb11 PE=1 SV=2	39.605	35.7616	121	106.4	109.3	95.5	120.4	80.8	94.2	84.4	90.1	97.9
O89112	Glutathione S-transferase LANCL1 OS=Mus musculus OX=10090 GN=Lancl1 PE=1 SV=1	39.192	20.0501	106	103.9	100.7	95.3	108.1	88.2	92.6	104	103.8	97.3
Q8BZX4	Splicing regulatory glutamine/lysine-rich protein 1 OS=Mus musculus OX=10090 GN=Srek1 PE=2 SV=1	39.046	12.1457	91.2	96	86.9	94.5	78	136.4	109.6	104.7	102	100.5
Q9DB60	Prostamide/prostaglandin F synthase OS=Mus musculus OX=10090 GN=Prxl2b PE=1 SV=1	38.922	29.8507	102.2	92.7	107.8	118.8	92.7	107.5	88.4	96.9	96.9	96
O35678	Monoglyceride lipase OS=Mus musculus OX=10090 GN=Mgll PE=1 SV=1	38.809	25.7426	114.6	90.4	110.2	89.2	87.2	93.8	96	103.8	108.3	106.5
Q9D7N6	39S ribosomal protein L30, mitochondrial OS=Mus musculus OX=10090 GN=Mrpl30 PE=1 SV=1	38.743	36.25	98.8	114.2	108.1	113.6	102.2	94.8	90.6	91.3	92.9	93.5
Q99NF1	Beta,beta-carotene 9',10'-oxygenase OS=Mus musculus OX=10090 GN=Bco2 PE=1 SV=1	38.622	11.4662	109.4	96.9	105.7	111.9	114.6	92.2	94.1	92.3	91.3	91.6
O88630	Golgi SNAP receptor complex member 1 OS=Mus musculus OX=10090 GN=Gosr1 PE=1 SV=2	38.593	17.6	93.2	94.7	97	95.3	99.7	99.7	98.4	104.8	108.7	108.2
Q811S7	Upstream-binding protein 1 OS=Mus musculus OX=10090 GN=Ubp1 PE=1 SV=1	38.499	17.5926	86.8	96.8	95.1	104.2	93.3	107.1	93.2	109.5	104	110
Q9D8S9	BolA-like protein 1 OS=Mus musculus OX=10090 GN=Bola1 PE=1 SV=1	38.451	46.7153	96.9	100.4	100.6	109.4	95.8	106.1	99.6	98.9	91.8	100.6
Q3TL44	NLR family member X1 OS=Mus musculus OX=10090 GN=Nlrx1 PE=1 SV=1	38.272	9.53846	107.2	90.2	108	83.8	122.7	78.7	89.8	101.3	116.9	101.4
Q9DCX8	Iodotyrosine deiodinase 1 OS=Mus musculus OX=10090 GN=Iyd PE=1 SV=1	38.219	23.8596	130.6	107.2	114.5	92.8	119.6	71.8	92.8	84.7	96.4	89.5
Q8CJF7	Protein ELYS OS=Mus musculus OX=10090 GN=Ahctf1 PE=1 SV=1	38.147	3.65582	80.1	86.9	89.9	105.2	82.7	110.8	118.3	111.2	105.9	108.9
P31750	RAC-alpha serine/threonine-protein kinase OS=Mus musculus OX=10090 GN=Akt1 PE=1 SV=2	37.598	15.625	111.7	100.8	124.6	88	100	83.1	98.4	98.4	99.1	96.1
P70353	Nuclear transcription factor Y subunit gamma OS=Mus musculus OX=10090 GN=Nfyc PE=1 SV=2	37.591	15.5224	87.4	89.9	90.7	96.3	91.4	113.4	106.4	108.6	107.9	108
Q9QXG2	Rab proteins geranylgeranyltransferase component A 1 OS=Mus musculus OX=10090 GN=Chm PE=1 SV=1	37.476	12.4812	109.5	86.7	92.5	99.9	98.3	95.2	96.1	108.4	107.6	105.7
Q8R238	Serine dehydratase-like OS=Mus musculus OX=10090 GN=Sdsl PE=1 SV=1	37.203	23.7082	100.9	96.8	95.3	94.7	103.2	96.6	89.2	108.4	112.3	102.7
Q8K2Q0	COMM domain-containing protein 9 OS=Mus musculus OX=10090 GN=Commd9 PE=1 SV=3	37.01	41.9192	84.6	93	90.2	106.2	98.8	108.9	98.8	111.3	105.4	102.9
P47915	60S ribosomal protein L29 OS=Mus musculus OX=10090 GN=Rpl29 PE=1 SV=2	37.009	24.375	115.8	116	125.6	106.2	95.6	66.8	81.9	83	94.9	114.3
Q63850	Nuclear pore glycoprotein p62 OS=Mus musculus OX=10090 GN=Nup62 PE=1 SV=2	36.991	12.9278	87.5	98.4	97.7	95.9	89.4	110.4	111.6	105.8	94.1	109.2
Q9CQE3	28S ribosomal protein S17, mitochondrial OS=Mus musculus OX=10090 GN=Mrps17 PE=1 SV=1	36.651	51.6667	105.8	123	124.7	108.6	117.5	84.1	89.8	78.9	81.1	86.6
Q9ESN6	Tripartite motif-containing protein 2 OS=Mus musculus OX=10090 GN=Trim2 PE=1 SV=1	36.645	13.0376	92.8	95.4	96.7	105	99.2	102.4	88.5	99.4	111.9	108.7
Q9D0A3	Arpin OS=Mus musculus OX=10090 GN=Arpin PE=1 SV=1	36.643	23.0088	97	94.2	101.7	102.1	85.3	105.3	102.6	102.7	101.2	107.8
Q8R2Y2	Cell surface glycoprotein MUC18 OS=Mus musculus OX=10090 GN=Mcam PE=1 SV=1	36.612	6.94444	97.3	88	88.7	81.1	86.2	99.7	107.5	112.6	120.9	118
Q03249	Galactose-1-phosphate uridylyltransferase OS=Mus musculus OX=10090 GN=Galt PE=1 SV=3	36.548	20.8443	99	94.2	98.8	103.1	101.5	101.9	95.4	103.8	103.2	99.2
Q8VEE4	Replication protein A 70 kDa DNA-binding subunit OS=Mus musculus OX=10090 GN=Rpa1 PE=1 SV=1	36.362	10.1124	94.5	104.1	98.9	102.5	98.6	105.4	104.1	99.5	95.6	96.9
O35075	Vacuolar protein sorting-associated protein 26C OS=Mus musculus OX=10090 GN=Vps26c PE=1 SV=1	36.239	22.8956	98.9	97.3	101.1	91.2	113.4	89.6	98.5	100.6	105.6	103.9
Q8R3G1	Nuclear inhibitor of protein phosphatase 1 OS=Mus musculus OX=10090 GN=Ppp1r8 PE=1 SV=1	35.983	19.6581	58.3	76.2	66.2	76.5	113.5	138.5	127.5	103.5	132	107.8
Q6ZWM4	U6 snRNA-associated Sm-like protein LSm8 OS=Mus musculus OX=10090 GN=Lsm8 PE=1 SV=3	35.965	63.5417	87.2	101.9	94.2	104.2	90.5	112.4	100	101.1	103	105.6
P35980	60S ribosomal protein L18 OS=Mus musculus OX=10090 GN=Rpl18 PE=1 SV=3	35.843	26.0638	84	101.8	99.5	98.5	99.2	90.2	123.5	93.9	97.8	111.6
Q8CC35	Synaptopodin OS=Mus musculus OX=10090 GN=Synpo PE=1 SV=2	35.82	5.92034	96.1	91.9	108.4	95.7	88.6	92.8	122.5	89.5	110.8	103.8
O54962	Barrier-to-autointegration factor OS=Mus musculus OX=10090 GN=Banf1 PE=1 SV=1	35.445	69.6629	62.3	81.2	71.7	98.3	83.9	136.4	143.3	124	88	110.9
Q8JZY4	Mitochondrial ribonuclease P catalytic subunit OS=Mus musculus OX=10090 GN=Prorp PE=2 SV=1	35.242	12.8425	119.2	88.1	102.6	117.5	124.6	86.4	81.5	86.7	97.1	96.3
O54990	Prominin-1 OS=Mus musculus OX=10090 GN=Prom1 PE=1 SV=1	35.202	8.18916	104.3	102.2	114.9	87.5	125	87.8	96.9	89	97.2	95.2
Q9CPS6	Histidine triad nucleotide-binding protein 3 OS=Mus musculus OX=10090 GN=Hint3 PE=1 SV=1	35.166	47.8788	113.3	103.5	112.5	100.9	107.4	89.7	91.4	94.6	96.5	90.3
Q9JLI8	Squamous cell carcinoma antigen recognized by T-cells 3 OS=Mus musculus OX=10090 GN=Sart3 PE=1 SV=1	34.945	6.75676	88.2	94.5	89	85.6	98	91.8	103.1	114.3	119.9	115.6
P97479	Unconventional myosin-VIIa OS=Mus musculus OX=10090 GN=Myo7a PE=1 SV=2	34.784	4.69526	104.3	82.9	100.8	83.7	105.2	84.5	85.9	112.2	129.8	110.7
Q8C6I2	Succinate dehydrogenase assembly factor 2, mitochondrial OS=Mus musculus OX=10090 GN=Sdhaf2 PE=1 SV=1	34.665	39.0244	98.5	105.4	121.1	105.3	98.3	103.2	100.3	87.7	86.2	94
O35900	U6 snRNA-associated Sm-like protein LSm2 OS=Mus musculus OX=10090 GN=Lsm2 PE=1 SV=1	34.652	61.0526	80.3	109	92.3	100.4	91.8	115.5	115.4	104.3	93.6	97.3
O70274	Protein tyrosine phosphatase type IVA 2 OS=Mus musculus OX=10090 GN=Ptp4a2 PE=1 SV=1	34.637	31.1377	98.4	102.5	101.2	94.6	106.5	92.1	105.7	98.4	101.8	98.8
P70280	Vesicle-associated membrane protein 7 OS=Mus musculus OX=10090 GN=Vamp7 PE=1 SV=1	34.275	31.8182	103.9	87	105.1	80.6	109.9	79.7	88.6	107.1	125	113
A2ALS5	Rap1 GTPase-activating protein 1 OS=Mus musculus OX=10090 GN=Rap1gap PE=1 SV=2	34.256	13.8763	104.3	104.8	107.1	110.5	106.3	91.5	82.6	91.8	103.5	97.6
Q8C1D8	Protein IWS1 homolog OS=Mus musculus OX=10090 GN=Iws1 PE=1 SV=1	34.074	9.13838	92.3	99.2	92.4	96.5	92.4	107.8	98.7	106.4	108.3	106
O88845	A-kinase anchor protein 10, mitochondrial OS=Mus musculus OX=10090 GN=Akap10 PE=1 SV=3	34.012	10.8761	94.1	92.6	97.1	98.2	102.6	100.1	95.2	103.8	109.1	107.1
Q62420	Endophilin-A1 OS=Mus musculus OX=10090 GN=Sh3gl2 PE=1 SV=2	33.868	21.875	109.4	111.7	107.3	108.5	102.9	91.1	91.9	97	89.4	90.8
Q9D0L8	mRNA cap guanine-N7 methyltransferase OS=Mus musculus OX=10090 GN=Rnmt PE=1 SV=1	33.748	14.6237	81.5	88.9	83.4	93.1	96.1	111.6	110.2	110.7	112.4	112.1
Q5U4D9	THO complex subunit 6 homolog OS=Mus musculus OX=10090 GN=Thoc6 PE=1 SV=1	33.571	21.1144	83.6	88.1	88.6	94.7	95.8	107.9	101.6	113.9	106.1	119.8
P70236	Dual specificity mitogen-activated protein kinase kinase 6 OS=Mus musculus OX=10090 GN=Map2k6 PE=1 SV=1	33.571	29.6407	97.2	121.2	94.7	113.3	116.5	88.2	93.5	91.6	94.9	88.9
Q8R307	Vacuolar protein sorting-associated protein 18 homolog OS=Mus musculus OX=10090 GN=Vps18 PE=1 SV=2	33.393	6.1665	100.7	79.7	96.8	81.1	109	83.5	92.3	112.3	135.1	109.4
Q9CQB2	MAPK regulated corepressor interacting protein 2 OS=Mus musculus OX=10090 GN=Mcrip2 PE=1 SV=1	33.339	45.625	145.8	112.9	156.1	100.1	106.7	76.7	79.3	71.4	77.3	73.7
Q99LJ1	Tissue alpha-L-fucosidase OS=Mus musculus OX=10090 GN=Fuca1 PE=1 SV=1	33.242	14.823	127.2	111.5	120.2	106.8	119.5	65.8	76.2	89	93.6	90
Q8K2Q7	BRO1 domain-containing protein BROX OS=Mus musculus OX=10090 GN=Brox PE=1 SV=1	33.118	18.2482	108.4	94.9	101.8	88.8	109.1	86.2	97.2	101.3	110.8	101.4
Q61559	IgG receptor FcRn large subunit p51 OS=Mus musculus OX=10090 GN=Fcgrt PE=1 SV=1	33.06	10.137	99.4	91.6	82.2	84.3	94.9	100.5	112	107	112.1	116.1
Q8BYC6	Serine/threonine-protein kinase TAO3 OS=Mus musculus OX=10090 GN=Taok3 PE=1 SV=2	33.055	5.79065	86.6	89.1	87.5	86.8	88.2	110.8	107.3	114.9	115.1	113.6
P08074	Carbonyl reductase [NADPH] 2 OS=Mus musculus OX=10090 GN=Cbr2 PE=1 SV=1	32.794	32.377	82.6	121.9	72.1	119.8	96.9	111.5	111.9	91.8	98.5	92.9
Q9DCE5	p21-activated protein kinase-interacting protein 1 OS=Mus musculus OX=10090 GN=Pak1ip1 PE=1 SV=2	32.768	20.4188	98.2	99.1	99	101.6	89.8	101.1	105.2	102.8	99.8	103.4
Q99LJ0	CTTNBP2 N-terminal-like protein OS=Mus musculus OX=10090 GN=Cttnbp2nl PE=1 SV=1	32.635	8.46395	84.2	87.1	89.2	89	86.1	118.9	109.9	113.8	112	109.8
Q8BJ03	Cytochrome c oxidase assembly protein COX15 homolog OS=Mus musculus OX=10090 GN=Cox15 PE=1 SV=1	32.547	15.4964	132.9	94.4	123.5	81.9	123.6	69.2	82.4	85.8	114.1	92.2
Q0VGB7	Serine/threonine-protein phosphatase 4 regulatory subunit 2 OS=Mus musculus OX=10090 GN=Ppp4r2 PE=1 SV=1	32.4	20.1439	90.6	86.9	89.3	95.5	97.7	104.5	96.4	118.4	104.7	115.9
Q80W00	Serine/threonine-protein phosphatase 1 regulatory subunit 10 OS=Mus musculus OX=10090 GN=Ppp1r10 PE=1 SV=1	32.361	7.43243	101.3	99.2	90.2	111.1	91.9	106.5	106.9	95.5	99.3	98.2
Q7TSI3	Serine/threonine-protein phosphatase 6 regulatory subunit 1 OS=Mus musculus OX=10090 GN=Ppp6r1 PE=1 SV=1	32.333	7.59346	99.3	100.7	98.5	88.7	111.5	80	100.5	103.1	116.4	101.3
Q8K124	Pleckstrin homology domain-containing family O member 2 OS=Mus musculus OX=10090 GN=Plekho2 PE=1 SV=1	32.32	13.9394	75	88.5	86.1	96.9	84.1	129.7	113.4	109	109.6	107.7
P46656	Adrenodoxin, mitochondrial OS=Mus musculus OX=10090 GN=Fdx1 PE=1 SV=1	32.224	23.4043	126.8	113.5	118.1	118.8	108.3	85.5	86.7	77.3	81.6	83.4
Q5XJE5	RNA polymerase-associated protein LEO1 OS=Mus musculus OX=10090 GN=Leo1 PE=1 SV=2	32.02	7.94603	90.3	91.5	79.7	121.8	81.8	125.8	95	109.5	91.3	113.3
Q9D1J3	SAP domain-containing ribonucleoprotein OS=Mus musculus OX=10090 GN=Sarnp PE=1 SV=3	31.841	27.619	77.9	91	96.4	94.8	83.8	127	109.7	111.9	104.4	103.1
Q9CZG3	COMM domain-containing protein 8 OS=Mus musculus OX=10090 GN=Commd8 PE=1 SV=1	31.703	39.8907	103	101.3	102.4	102.8	101.2	97.9	98.9	94.9	101.2	96.3
Q8VBV3	Exosome complex component RRP4 OS=Mus musculus OX=10090 GN=Exosc2 PE=1 SV=1	31.671	20.8191	93	92	91.1	97.2	91.9	104.4	104.9	112	106.7	106.8
P97370	Sodium/potassium-transporting ATPase subunit beta-3 OS=Mus musculus OX=10090 GN=Atp1b3 PE=1 SV=1	31.375	21.223	98.2	103.1	110.5	86.6	108	93.7	107.9	93.6	100.7	97.8
Q8R015	Biogenesis of lysosome-related organelles complex 1 subunit 5 OS=Mus musculus OX=10090 GN=Bloc1s5 PE=1 SV=1	31.091	24.8649	90.7	94	99.4	105.2	100.4	106.1	98.9	102.7	100.5	102.1
P01132	Pro-epidermal growth factor OS=Mus musculus OX=10090 GN=Egf PE=1 SV=2	31.078	6.65571	118.9	124.4	120	123.5	142	76.6	75.4	73.7	68.7	76.7
Q60870	Receptor expression-enhancing protein 5 OS=Mus musculus OX=10090 GN=Reep5 PE=1 SV=1	30.925	18.3784	120.4	89.4	84.7	85.4	107.7	84.8	90.1	117.3	118.3	101.9
P21995	Embigin OS=Mus musculus OX=10090 GN=Emb PE=1 SV=2	30.874	16.3636	94.5	111.5	118.7	98.8	104.5	99.9	95.1	89.2	95.9	91.9
Q8VCC8	Rap guanine nucleotide exchange factor 3 OS=Mus musculus OX=10090 GN=Rapgef3 PE=1 SV=2	30.802	8.49673	109	85.1	100.2	100.1	100.3	92.4	88.7	103.6	113.7	107
P51880	Fatty acid-binding protein, brain OS=Mus musculus OX=10090 GN=Fabp7 PE=1 SV=2	30.35	38.6364	73.4	118.1	98.9	108.1	94.7	102.9	93.5	97.8	105.3	107.4
Q9QZB9	Dynactin subunit 5 OS=Mus musculus OX=10090 GN=Dctn5 PE=1 SV=1	30.184	43.4066	92.6	93.8	98.5	103.3	100	101.7	108.2	99.6	98.6	103.7
Q8BYU6	Torsin-1A-interacting protein 2 OS=Mus musculus OX=10090 GN=Tor1aip2 PE=1 SV=1	29.979	13.3466	81.9	71	75.6	78.6	79.8	121.8	118.9	115.5	134.9	122
Q9JLV1	BAG family molecular chaperone regulator 3 OS=Mus musculus OX=10090 GN=Bag3 PE=1 SV=2	29.969	8.14558	82.7	82.7	91.6	84.2	77.4	114.7	119.3	108.4	115.2	123.8
Q924C1	Exportin-5 OS=Mus musculus OX=10090 GN=Xpo5 PE=1 SV=1	29.585	7.14286	97.7	80.7	98.2	81.6	98.7	92.9	97.4	110.4	128.4	114.2
Q8R0X7	Sphingosine-1-phosphate lyase 1 OS=Mus musculus OX=10090 GN=Sgpl1 PE=1 SV=1	29.568	10.0352	78.2	75.4	83.9	76.4	92.2	111.6	110.4	127	126.7	118.3
Q91ZW2	GDP-fucose protein O-fucosyltransferase 1 OS=Mus musculus OX=10090 GN=Pofut1 PE=1 SV=1	29.55	18.5751	90.4	93.3	89.1	106.8	90.4	109.9	87.2	117.5	103.7	111.6
Q8R3Y8	Interferon regulatory factor 2-binding protein 1 OS=Mus musculus OX=10090 GN=Irf2bp1 PE=1 SV=2	29.438	20.8904	81.9	96.6	88.8	104.7	87.2	116.3	93.5	114.6	99.7	116.8
Q9CQ49	Nuclear cap-binding protein subunit 2 OS=Mus musculus OX=10090 GN=Ncbp2 PE=1 SV=1	29.371	30.7692	91.9	96.2	104.2	104.1	89.8	111	101.2	101.3	95.4	104.8
Q923D4	Splicing factor 3B subunit 5 OS=Mus musculus OX=10090 GN=Sf3b5 PE=1 SV=1	29.216	47.6744	89.3	95.3	96.2	97.2	90.2	119.7	105.6	102.6	98.3	105.6
Q8CJH3	Plexin-B1 OS=Mus musculus OX=10090 GN=Plxnb1 PE=1 SV=2	29.171	4.38886	91.1	94.6	88.6	93.7	98.5	103.1	108.6	110.8	104.9	106.1
Q6P2K6	Serine/threonine-protein phosphatase 4 regulatory subunit 3A OS=Mus musculus OX=10090 GN=Ppp4r3a PE=1 SV=1	29.139	10.122	46.6	87.3	50	71.8	175.9	85.7	157.3	92.5	124.7	108.2
Q9EP72	ER membrane protein complex subunit 7 OS=Mus musculus OX=10090 GN=Emc7 PE=1 SV=1	29.08	26.971	107.3	100.5	99.4	100	111.7	84.8	95.2	97.3	99.5	104.2
Q91XC8	Death-associated protein 1 OS=Mus musculus OX=10090 GN=Dap PE=1 SV=3	28.994	32.3529	110.9	86.1	88.5	94.1	59.3	112.4	105.7	95.7	120.7	126.5
Q921Z5	Tumor necrosis factor alpha-induced protein 8 OS=Mus musculus OX=10090 GN=Tnfaip8 PE=1 SV=1	28.593	27.2727	108.5	87.2	101.3	90.9	110.3	92.9	95	105.9	111.1	96.8
Q9CQE7	Endoplasmic reticulum-Golgi intermediate compartment protein 3 OS=Mus musculus OX=10090 GN=Ergic3 PE=1 SV=1	28.524	17.2324	119.3	90.2	101.5	85.2	105.9	83.5	92.5	104.8	112.6	104.4
O09114	Prostaglandin-H2 D-isomerase OS=Mus musculus OX=10090 GN=Ptgds PE=1 SV=1	28.449	27.5132	120.9	144.7	120.4	153.2	122.6	75.3	73.3	58.6	53.9	77.2
Q91VJ2	Caveolae-associated protein 3 OS=Mus musculus OX=10090 GN=Cavin3 PE=1 SV=1	28.403	19.2308	94.4	95.1	103.6	108.4	93.8	119.4	102.2	92	94	97.1
P14483	H-2 class II histocompatibility antigen, A beta chain OS=Mus musculus OX=10090 GN=H2-Ab1 PE=1 SV=1	28.293	23.0189	55.7	118.1	57.9	56	53.2	81.2	91.4	118.4	199.4	168.8
O08784	Treacle protein OS=Mus musculus OX=10090 GN=Tcof1 PE=1 SV=1	28.177	5.68182	103	113	100.1	114.7	103.1	91.9	90.4	94.3	93.9	95.7
O70309	Integrin beta-5 OS=Mus musculus OX=10090 GN=Itgb5 PE=1 SV=2	28.113	8.39599	101.6	103.3	99.8	97.3	108.6	89.8	95.9	101.2	105.3	97.1
Q9JKK1	Syntaxin-6 OS=Mus musculus OX=10090 GN=Stx6 PE=1 SV=1	28.086	21.5686	83.7	93.9	87.5	101.2	85.6	121.4	96.8	118.3	104.1	107.5
Q8CCP0	Nuclear export mediator factor Nemf OS=Mus musculus OX=10090 GN=Nemf PE=1 SV=2	27.934	6.67293	94.2	92.7	92.9	89.6	105.9	91.1	95.9	116.3	114.3	107.2
Q5SWU9	Acetyl-CoA carboxylase 1 OS=Mus musculus OX=10090 GN=Acaca PE=1 SV=1	27.919	2.98507	107.3	97.2	96.9	96.2	98.3	77.1	86.1	107.4	122.3	111.3
P52633	Signal transducer and transcription activator 6 OS=Mus musculus OX=10090 GN=Stat6 PE=1 SV=2	27.913	7.8853	91.7	85.1	90.6	80.3	99.2	94.4	96.6	117.3	129.9	115
Q9D1F4	Proline-rich AKT1 substrate 1 OS=Mus musculus OX=10090 GN=Akt1s1 PE=1 SV=1	27.88	18.2879	95.9	80.9	96.7	105.3	91.6	109.6	97	106.8	105.8	110.4
Q6PCN7	Helicase-like transcription factor OS=Mus musculus OX=10090 GN=Hltf PE=1 SV=1	27.859	10.0698	115.5	103.5	108.6	104.1	109.7	91.8	85.2	89.5	101.2	90.9
Q9D1H8	39S ribosomal protein L53, mitochondrial OS=Mus musculus OX=10090 GN=Mrpl53 PE=1 SV=1	27.855	38.1356	103.2	115.9	110	116.7	106.3	96.6	87.8	87.9	85.7	89.9
Q61687	Transcriptional regulator ATRX OS=Mus musculus OX=10090 GN=Atrx PE=1 SV=3	27.806	2.54443	105.5	86.8	108.6	106.1	85.3	107.1	98.2	98.2	97.8	106.6
Q99LG0	Ubiquitin carboxyl-terminal hydrolase 16 OS=Mus musculus OX=10090 GN=Usp16 PE=1 SV=2	27.77	10.303	90.2	95.5	98	105	96.5	106.8	91.1	102.9	109.4	104.5
P56376	Acylphosphatase-1 OS=Mus musculus OX=10090 GN=Acyp1 PE=1 SV=2	27.73	50.5051	102.7	108.2	110.1	111.2	94.1	103.4	96.4	93.5	88.8	91.6
Q91YN0	Protein C12orf4 homolog OS=Mus musculus OX=10090 GN=D6Wsu163e PE=1 SV=1	27.692	9.96377	96.7	101.3	90.6	95.7	103	100.4	99.8	104	106.7	101.7
Q8VD65	Phosphoinositide 3-kinase regulatory subunit 4 OS=Mus musculus OX=10090 GN=Pik3r4 PE=1 SV=3	27.607	5.30191	91.2	93	87.8	93.4	102.2	104.7	102.5	103.4	107.1	114.6
Q9ES00	Ubiquitin conjugation factor E4 B OS=Mus musculus OX=10090 GN=Ube4b PE=1 SV=3	27.464	5.6266	98.4	96.1	98.4	87.6	96.9	91.8	96	109.9	117.9	107
Q99N23	Carbonic anhydrase 15 OS=Mus musculus OX=10090 GN=Ca15 PE=1 SV=1	27.305	20.679	91	102.2	99.4	104.7	117.8	107.7	94.7	98.1	95.6	88.7
P04918	Serum amyloid A-3 protein OS=Mus musculus OX=10090 GN=Saa3 PE=1 SV=1	27.294	49.1803	32.6	35	38.5	44.1	40.9	149.2	214.4	155.8	136.2	153.2
Q9Z266	SNARE-associated protein Snapin OS=Mus musculus OX=10090 GN=Snapin PE=1 SV=1	27.275	40.4412	99.5	95.9	99.6	110.2	92.7	109.3	99.6	96	96.3	100.7
Q91YX5	Acyl-CoA:lysophosphatidylglycerol acyltransferase 1 OS=Mus musculus OX=10090 GN=Lpgat1 PE=1 SV=1	27.211	13.7838	110.1	71.9	90.1	71.6	106.7	70.2	80.2	119	157.6	122.5
Q8BGR9	Ubiquitin-like domain-containing CTD phosphatase 1 OS=Mus musculus OX=10090 GN=Ublcp1 PE=1 SV=1	27.209	13.522	89	102.4	98.6	109.8	99.5	98.2	99.7	98.5	100.4	103.9
P09602	Non-histone chromosomal protein HMG-17 OS=Mus musculus OX=10090 GN=Hmgn2 PE=1 SV=2	27.131	41.1111	66.1	73.7	60.2	96.5	81.1	144.8	136.3	115.3	123.5	102.5
Q711T7	Glutamine-dependent NAD(+) synthetase OS=Mus musculus OX=10090 GN=Nadsyn1 PE=1 SV=1	27.089	11.3103	98.4	77.8	83	88.7	102.5	82.4	93.6	120.4	133	120.2
Q91WR3	Activating signal cointegrator 1 complex subunit 2 OS=Mus musculus OX=10090 GN=Ascc2 PE=1 SV=1	27.047	8.2777	102.4	78	89.5	84	84.6	96.3	89.2	116.4	137.3	122.2
Q91WG4	Elongator complex protein 2 OS=Mus musculus OX=10090 GN=Elp2 PE=1 SV=1	27.041	13.4777	90	82	87.7	90.7	96.7	100.4	87.9	129.3	113.6	121.7
Q922M3	BTB/POZ domain-containing adapter for CUL3-mediated RhoA degradation protein 3 OS=Mus musculus OX=10090 GN=Kctd10 PE=1 SV=1	26.915	18.7302	85.8	76.6	81.9	87.4	81.6	113.8	121.9	115.5	117.1	118.4
Q9EPA7	Nicotinamide/nicotinic acid mononucleotide adenylyltransferase 1 OS=Mus musculus OX=10090 GN=Nmnat1 PE=1 SV=2	26.912	24.5614	74.3	89.2	87.7	98.9	106.8	119.8	101.5	102.8	103.5	115.5
Q8K3K8	Optineurin OS=Mus musculus OX=10090 GN=Optn PE=1 SV=1	26.855	11.3014	90.4	87.8	98.4	96.6	98.4	98.3	92.4	111.1	111.8	114.9
O88888	Amyloid-beta A4 precursor protein-binding family A member 3 OS=Mus musculus OX=10090 GN=Apba3 PE=1 SV=1	26.846	17.338	93.1	82.7	85.6	96	106.3	101.6	95.6	109	119.4	110.8
Q8C522	Endonuclease domain-containing 1 protein OS=Mus musculus OX=10090 GN=Endod1 PE=1 SV=2	26.765	18.9621	83.1	74.9	77.7	90.7	94.6	99.5	116.6	128.3	124.7	110
Q8K382	DENN domain-containing protein 1A OS=Mus musculus OX=10090 GN=Dennd1a PE=1 SV=2	26.754	7.67717	97.3	85.6	104.7	96.5	99.5	95.8	90.7	100	116.1	113.8
Q80YD1	ATP-dependent RNA helicase SUPV3L1, mitochondrial OS=Mus musculus OX=10090 GN=Supv3l1 PE=1 SV=1	26.587	8.08729	103.4	94	112.3	89.5	121.2	75.5	87.6	101.1	112.8	102.5
Q3UV70	[Pyruvate dehydrogenase [acetyl-transferring]]-phosphatase 1, mitochondrial OS=Mus musculus OX=10090 GN=Pdp1 PE=1 SV=1	26.556	12.2677	85.9	107.5	85.1	104.6	97.8	114.4	96.9	110.1	96	101.5
Q9CVD2	Ataxin-3 OS=Mus musculus OX=10090 GN=Atxn3 PE=1 SV=2	26.53	19.1549	81.8	91.1	91.7	93.7	84	113.5	107.3	111.3	110.4	115.3
Q5ND34	WD repeat-containing protein 81 OS=Mus musculus OX=10090 GN=Wdr81 PE=1 SV=2	26.513	2.79214	91.4	93.6	86.8	87.4	110.9	92.8	100.6	107.3	121.8	107.5
Q7TSC1	Protein PRRC2A OS=Mus musculus OX=10090 GN=Prrc2a PE=1 SV=1	26.495	3.4291	98.3	96.2	99.9	96	93.9	104.5	105.1	98.9	100	107.2
Q91YL3	Uridine-cytidine kinase-like 1 OS=Mus musculus OX=10090 GN=Uckl1 PE=1 SV=1	26.479	13.3212	94.8	92.9	89.3	92.8	102.2	87.4	93.7	109.3	112.2	125.2
O08532	Voltage-dependent calcium channel subunit alpha-2/delta-1 OS=Mus musculus OX=10090 GN=Cacna2d1 PE=1 SV=1	26.476	6.52765	97.7	92.1	93.2	98	99.8	105	101.9	101.5	105.6	105.3
Q5SWT3	Solute carrier family 25 member 35 OS=Mus musculus OX=10090 GN=Slc25a35 PE=1 SV=2	26.474	18	110.7	95.2	110.7	104.2	124	75.4	85.9	89	108.8	96.2
Q9JKF6	Nectin-1 OS=Mus musculus OX=10090 GN=Nectin1 PE=1 SV=3	26.084	13.5922	89.5	90.7	87.5	98.1	90.7	114.1	107.8	107.9	103.3	110.5
Q66GT5	Phosphatidylglycerophosphatase and protein-tyrosine phosphatase 1 OS=Mus musculus OX=10090 GN=Ptpmt1 PE=1 SV=1	26.054	32.1244	104.6	106.4	103.7	98.5	110.6	88.6	87.9	98.4	97.8	103.6
Q9DBS1	Transmembrane protein 43 OS=Mus musculus OX=10090 GN=Tmem43 PE=1 SV=1	26.037	14.75	83.7	72.8	84.7	84.9	86.2	103.6	97	132.6	122.1	132.2
Q8K1E0	Syntaxin-5 OS=Mus musculus OX=10090 GN=Stx5 PE=1 SV=3	25.968	14.9296	99.1	91.5	89.3	93.2	95	105.1	104.9	103.4	115	103.4
Q9R062	Glycogenin-1 OS=Mus musculus OX=10090 GN=Gyg1 PE=1 SV=3	25.963	18.9189	98	114.9	104	96.9	99.9	95.6	103	92.5	95.2	100
Q9CQV5	28S ribosomal protein S24, mitochondrial OS=Mus musculus OX=10090 GN=Mrps24 PE=1 SV=1	25.94	35.3293	111.7	95.6	109	108	107.8	89.3	84.6	96.7	96.6	100.6
Q8BM55	Transmembrane protein 214 OS=Mus musculus OX=10090 GN=Tmem214 PE=1 SV=1	25.89	7.27802	117.4	93.2	106.3	82.5	111.6	75.7	84.6	104.7	119.7	104.3
Q99JY4	TraB domain-containing protein OS=Mus musculus OX=10090 GN=Trabd PE=1 SV=1	25.852	15.4255	106.6	84.2	110.4	80.3	106.4	73.7	89.8	114.1	127.9	106.5
Q8K284	General transcription factor 3C polypeptide 1 OS=Mus musculus OX=10090 GN=Gtf3c1 PE=1 SV=2	25.835	4.66445	107.7	83.8	101.3	98.8	95.1	95.7	85.6	104.9	117.6	109.6
Q9R0L6	Pericentriolar material 1 protein OS=Mus musculus OX=10090 GN=Pcm1 PE=1 SV=2	25.742	2.66667	94.2	92.4	105.2	102.1	94.1	104.4	98.5	102.5	102.5	104
Q9D975	Sulfiredoxin-1 OS=Mus musculus OX=10090 GN=Srxn1 PE=2 SV=1	25.626	41.9118	77	73.2	73.5	76.4	81.2	97.8	113.2	120.7	138.4	148.7
Q9EPV8	Ubiquitin-like protein 5 OS=Mus musculus OX=10090 GN=Ubl5 PE=1 SV=1	25.599	52.0548	89.4	89.5	95.1	94.9	87.9	116.3	119	104.7	105.5	97.7
Q9DAU1	Protein canopy homolog 3 OS=Mus musculus OX=10090 GN=Cnpy3 PE=1 SV=1	25.582	17.7536	106.1	107	105.9	105.4	94	95.3	92.2	99	93.6	101.4
Q9D2Z8	Kinesin-like protein KIF12 OS=Mus musculus OX=10090 GN=Kif12 PE=1 SV=1	25.559	12.1495	95.2	97.1	99.1	100.8	103.1	100.6	84.7	106.5	106.4	106.4
P31725	Protein S100-A9 OS=Mus musculus OX=10090 GN=S100a9 PE=1 SV=3	25.416	40.708	39	57	40.3	59.9	41.9	145.5	223.1	141.6	95.1	156.7
Q8BFW4	Tripartite motif-containing protein 65 OS=Mus musculus OX=10090 GN=Trim65 PE=1 SV=1	25.309	13.6015	85.7	87.8	92.4	105.5	94.1	109.1	100	115.2	99	111.2
P11688	Integrin alpha-5 OS=Mus musculus OX=10090 GN=Itga5 PE=1 SV=3	25.241	9.40171	73.7	84.7	83	90.9	79.8	124.2	107	116.5	118.6	121.5
Q5NBX1	Protein cordon-bleu OS=Mus musculus OX=10090 GN=Cobl PE=1 SV=1	25.237	3.8893	66.7	83.7	74.4	79.6	72.8	109.9	112.3	130.5	129.5	140.6
Q00915	Retinol-binding protein 1 OS=Mus musculus OX=10090 GN=Rbp1 PE=1 SV=2	25.203	37.7778	115	91.9	89.1	95.2	95.1	114.3	100.5	96.6	98	104.3
P47879	Insulin-like growth factor-binding protein 4 OS=Mus musculus OX=10090 GN=Igfbp4 PE=1 SV=2	25.172	30.7087	135.8	110.3	108.7	131	114.2	53.6	60.1	104.1	90	92.1
Q6DIC0	Probable global transcription activator SNF2L2 OS=Mus musculus OX=10090 GN=Smarca2 PE=1 SV=1	25.154	5.07292	98.1	112.7	108.6	108.5	98.6	100.1	107	88	88.3	90.2
Q8BUY5	Complex I assembly factor TIMMDC1, mitochondrial OS=Mus musculus OX=10090 GN=Timmdc1 PE=1 SV=1	25.095	21.4035	124	104.4	117.8	94.4	118.5	74.1	83	91.7	100.1	92.1
Q3V1T4	Prolyl 3-hydroxylase 1 OS=Mus musculus OX=10090 GN=P3h1 PE=1 SV=2	25.063	10.6901	95.4	93.7	91.9	92	85.7	109.6	90.9	113.2	108.9	118.9
Q3UMR5	Calcium uniporter protein, mitochondrial OS=Mus musculus OX=10090 GN=Mcu PE=1 SV=2	25.03	18	107.2	94.2	101.2	92.3	115.7	87.6	89.3	103.4	112.1	96.9
Q8BVG4	Dipeptidyl peptidase 9 OS=Mus musculus OX=10090 GN=Dpp9 PE=1 SV=2	24.912	5.80046	99.6	96.3	98	96.2	97.8	84.6	95.7	105.5	113.9	112.3
Q05186	Reticulocalbin-1 OS=Mus musculus OX=10090 GN=Rcn1 PE=1 SV=1	24.416	16.3077	90.4	110.8	100.3	97.6	82.3	101.4	95.3	99.9	98.6	123.5
P52840	Sulfotransferase 1A1 OS=Mus musculus OX=10090 GN=Sult1a1 PE=1 SV=1	24.389	20.9622	80.4	72.5	87.3	94.6	83.5	132.9	106.1	111.9	114.2	116.6
Q8R5F8	Epidermal growth factor receptor kinase substrate 8-like protein 1 OS=Mus musculus OX=10090 GN=Eps8l1 PE=1 SV=1	24.347	9.77654	69.8	88.5	89.4	100.2	84.6	115.6	120.3	137.5	103.2	91
Q9JJA2	Conserved oligomeric Golgi complex subunit 8 OS=Mus musculus OX=10090 GN=Cog8 PE=1 SV=3	24.316	9.6875	99.3	85.4	95.1	91.6	100	96.7	92.2	108.3	120.8	110.7
O08739	AMP deaminase 3 OS=Mus musculus OX=10090 GN=Ampd3 PE=1 SV=2	24.221	10.0522	81.9	74.2	84	88.4	82.4	87.9	121.4	143.1	123.5	113.2
Q8K4L3	Supervillin OS=Mus musculus OX=10090 GN=Svil PE=1 SV=1	24.184	2.76498	143.4	109.1	141.4	107.2	85.8	86.2	84.8	81	81.4	79.6
O55229	Choline/ethanolamine kinase OS=Mus musculus OX=10090 GN=Chkb PE=1 SV=3	24.18	15.9898	96	83.3	85	89	88.7	103.3	100.1	116.7	122.4	115.4
P04627	Serine/threonine-protein kinase A-Raf OS=Mus musculus OX=10090 GN=Araf PE=1 SV=2	24.122	10.9272	104.1	83.4	88.4	110.1	84.7	120.8	84.1	108.6	105.1	110.7
Q64261	Cyclin-dependent kinase 6 OS=Mus musculus OX=10090 GN=Cdk6 PE=1 SV=2	24.094	19.6319	98.3	76.2	79.5	77.2	89.8	97.8	104.1	121.1	131.7	124.3
Q9ES97	Reticulon-3 OS=Mus musculus OX=10090 GN=Rtn3 PE=1 SV=2	24.039	3.63071	132.4	98.1	127.4	72.6	118.6	72.1	104.1	80.6	111.4	82.8
Q5SV80	Unconventional myosin-XIX OS=Mus musculus OX=10090 GN=Myo19 PE=1 SV=1	23.986	6.95742	86.4	94.4	91.6	94	101.1	97.7	96.6	106.8	114.5	116.9
Q8BXZ1	Protein disulfide-isomerase TMX3 OS=Mus musculus OX=10090 GN=Tmx3 PE=1 SV=2	23.958	12.9386	104.7	99.2	106.5	83.4	102.6	85.6	96.5	107.8	112.5	101.2
P83741	Serine/threonine-protein kinase WNK1 OS=Mus musculus OX=10090 GN=Wnk1 PE=1 SV=2	23.846	2.31384	86.9	92.2	93.4	93.7	87.1	111.8	105.1	106.6	110.6	112.7
P13634	Carbonic anhydrase 1 OS=Mus musculus OX=10090 GN=Ca1 PE=1 SV=4	23.82	20.6897	39.7	107.6	94.1	72.9	62.1	160.1	160.6	101.6	50	151.4
Q5XG73	Acyl-CoA-binding domain-containing protein 5 OS=Mus musculus OX=10090 GN=Acbd5 PE=1 SV=1	23.681	12.2047	99	86.5	87.9	84.7	95.3	89.2	107.1	111.8	125.9	112.6
Q80X41	Serine/threonine-protein kinase VRK1 OS=Mus musculus OX=10090 GN=Vrk1 PE=1 SV=2	23.666	16.5909	72.8	92.3	87.7	85.7	104.1	106.3	117.2	108.4	113.9	111.6
P46662	Merlin OS=Mus musculus OX=10090 GN=Nf2 PE=1 SV=2	23.61	11.5772	100.8	95.9	100.3	99.2	105.7	85.5	89.1	106.2	113.1	104.2
Q9QXA5	U6 snRNA-associated Sm-like protein LSm4 OS=Mus musculus OX=10090 GN=Lsm4 PE=1 SV=1	23.579	30.6569	92.9	102.8	95.5	100.2	82.8	118.3	106.9	102.3	97.1	101.2
O35490	Betaine--homocysteine S-methyltransferase 1 OS=Mus musculus OX=10090 GN=Bhmt PE=1 SV=1	23.015	12.5307	63.8	114	133.1	102.6	87.6	82.1	85.2	151.9	79.1	100.6
Q60716	Prolyl 4-hydroxylase subunit alpha-2 OS=Mus musculus OX=10090 GN=P4ha2 PE=1 SV=1	22.968	14.3389	87.8	88.4	86.2	92.9	88.1	96.6	105.9	117.2	114	122.9
Q9JMC3	DnaJ homolog subfamily A member 4 OS=Mus musculus OX=10090 GN=Dnaja4 PE=1 SV=1	22.755	19.8992	113.9	91.8	101.3	116.9	95	102	88.4	95.3	98.8	96.5
Q8CHC4	Synaptojanin-1 OS=Mus musculus OX=10090 GN=Synj1 PE=1 SV=3	22.635	3.55781	90.1	78.7	88.1	89.8	102.3	105.1	101.8	109.5	123.6	111
Q61508	Extracellular matrix protein 1 OS=Mus musculus OX=10090 GN=Ecm1 PE=1 SV=2	22.473	10.5546	107.4	79.8	89.7	100.2	98.4	126.1	110	93	105.5	89.9
O89103	Complement component C1q receptor OS=Mus musculus OX=10090 GN=Cd93 PE=1 SV=1	22.424	8.22981	86	86.4	86.8	84.8	80.2	125.4	115.2	115.6	107.7	111.9
Q8BPG6	Inactive C-alpha-formylglycine-generating enzyme 2 OS=Mus musculus OX=10090 GN=Sumf2 PE=1 SV=2	22.415	18.1818	89.8	107.6	93.1	114.3	89.2	104.9	92.2	103.7	99.1	106.3
Q922H9	Zinc finger protein 330 OS=Mus musculus OX=10090 GN=Znf330 PE=1 SV=1	22.399	12.9747	88.5	102.9	96.1	106	83.4	107.7	105.8	101.3	97.7	110.6
P97765	WW domain-binding protein 2 OS=Mus musculus OX=10090 GN=Wbp2 PE=1 SV=1	22.178	16.4751	98	107.5	102.6	111.4	102	96.4	103.5	90.9	86.8	100.9
Q91XI1	tRNA-dihydrouridine(47) synthase [NAD(P)(+)]-like OS=Mus musculus OX=10090 GN=Dus3l PE=1 SV=1	22.131	10.3611	50.3	56	57.9	61.5	58.9	79.8	75.1	254.3	68.3	237.9
Q60855	Receptor-interacting serine/threonine-protein kinase 1 OS=Mus musculus OX=10090 GN=Ripk1 PE=1 SV=1	22.049	8.68902	93.4	88.2	87.7	89.8	86.7	104.6	105.5	111.9	115.5	116.6
O35972	39S ribosomal protein L23, mitochondrial OS=Mus musculus OX=10090 GN=Mrpl23 PE=1 SV=1	22.038	53.4247	96.1	99.2	96.4	104.8	103.1	98.6	103.4	101.5	99.5	97.5
Q05BC3	Echinoderm microtubule-associated protein-like 1 OS=Mus musculus OX=10090 GN=Eml1 PE=1 SV=1	22.006	7.00246	86.6	92.5	89.1	94.3	97.2	108.2	101.1	107.8	108.3	114.8
Q8CCM6	Mitochondrial import inner membrane translocase subunit Tim21 OS=Mus musculus OX=10090 GN=Timm21 PE=1 SV=2	21.893	22.9508	116.2	100.7	106.1	99.6	110.5	89.6	85.9	89.3	100.8	101.3
Q6PD26	GPI transamidase component PIG-S OS=Mus musculus OX=10090 GN=Pigs PE=1 SV=3	21.838	11.5315	119.4	90.1	97.3	85	113.2	79	89.1	102	118.8	106.1
Q9R0L7	A-kinase anchor protein 8-like OS=Mus musculus OX=10090 GN=Akap8l PE=1 SV=1	21.51	10.1246	80.3	86.8	89.6	101	100.2	118	109.5	102.9	101.2	110.5
O88413	Tubby-related protein 3 OS=Mus musculus OX=10090 GN=Tulp3 PE=1 SV=1	21.397	10.8696	105.1	101.1	106.8	107.9	100.5	101	91.2	93.9	95.1	97.5
Q9DCW2	Phospholipid scramblase 2 OS=Mus musculus OX=10090 GN=Plscr2 PE=1 SV=3	21.38	19.8697	112.7	97.5	109	79.2	117.7	72.6	85.1	96.9	125.9	103.4
O88811	Signal transducing adapter molecule 2 OS=Mus musculus OX=10090 GN=Stam2 PE=1 SV=1	21.332	13.0019	91.7	87.1	96.5	92.4	88.6	102	100.1	108.5	117	116.1
Q91WG8	Bifunctional UDP-N-acetylglucosamine 2-epimerase/N-acetylmannosamine kinase OS=Mus musculus OX=10090 GN=Gne PE=1 SV=1	21.06	8.44875	98.1	96.8	103.5	95.6	104.2	95.1	96.5	100.7	106.2	103.3
P07309	Transthyretin OS=Mus musculus OX=10090 GN=Ttr PE=1 SV=1	21.053	35.3741	93.5	126	96.2	119.5	109.6	74.5	94.2	93.5	63.2	129.7
Q8BGV0	Probable asparagine--tRNA ligase, mitochondrial OS=Mus musculus OX=10090 GN=Nars2 PE=1 SV=1	20.978	13.4172	101.6	100.2	105.3	101.5	111.8	90.4	91.1	101.7	99.2	97.3
Q9CSH3	Exosome complex exonuclease RRP44 OS=Mus musculus OX=10090 GN=Dis3 PE=1 SV=4	20.878	5.74113	79.8	91.8	84.5	92.8	98.6	102.2	104.6	114.2	120	111.4
P62077	Mitochondrial import inner membrane translocase subunit Tim8 B OS=Mus musculus OX=10090 GN=Timm8b PE=1 SV=1	20.694	54.2169	121.9	122.6	117.4	117.4	106.1	89.2	90.2	76.4	79	79.7
Q922V4	Pleiotropic regulator 1 OS=Mus musculus OX=10090 GN=Plrg1 PE=1 SV=1	20.66	11.306	72	88.9	83.4	95.6	92.6	122.5	116.5	111.5	106.4	110.7
Q3TCJ1	BRISC complex subunit Abraxas 2 OS=Mus musculus OX=10090 GN=Abraxas2 PE=1 SV=1	20.452	11.0843	84.6	92.7	94.9	105.1	91.2	102.1	91.4	119.8	101.3	116.9
Q9CQF8	Ribosomal protein 63, mitochondrial OS=Mus musculus OX=10090 GN=Mrpl57 PE=1 SV=1	20.369	35.2941	116.5	112.9	115.2	106.2	104.1	89.3	89	89.2	79.4	98.3
[truncated: 3,186 more rows]

## Sheet: Table S3
Table S3. The list of all metabolites identified in the SA-AKI metabolome.
Metabolites	Abundances: Control 1	Abundances: Control 2	Abundances: Control 3	Abundances: Control 4	Abundances: Control 5	Abundances: SA-AKI 1	Abundances: SA-AKI 2	Abundances: SA-AKI 3	Abundances: SA-AKI 4	Abundances: SA-AKI 5
(+)-A-Pinene	4.77142e+06	7.35834e+06	7.27805e+06	8.78782e+06	8.92552e+06	8.36498e+06	9.56339e+06	7.01594e+06	7.46391e+06	7.29588e+06
1-(Beta-D-Ribofuranosyl)-1,4-Dihydronicotinamide	1.7008e+07	6.02025e+07	2.91644e+07	9.95618e+07	1.54597e+08	2.20372e+07	1.92765e+07	1.38894e+07	1.69892e+07	3.59534e+07
1-(Sn-Glycero-3-Phospho)-1D-Myo-Inositol	1.35512e+06	1.52083e+06	1.2666e+06	1.91152e+06	1.44689e+06	2.10058e+06	1.83199e+06	1.928e+06	2.17924e+06	2.13358e+06
12-Hydroxy-12-Octadecanoylcarnitine	1.17877e+07	3.00307e+07	8.00266e+07	4.45252e+07	2.60623e+07	2.702e+07	2.88523e+07	4.18797e+07	3.27676e+07	3.69518e+07
13Z-Docosenamide/13E-Docosenamide	4.75806e+08	5.35871e+08	3.39501e+08	3.57853e+08	3.05714e+08	4.02461e+08	3.60749e+08	2.25757e+08	2.76103e+08	3.74381e+08
17A,21-Dihydroxypreg-Nenolone	365163	579784	488681	772536	415561	7.60041e+06	6.47031e+06	3.70202e+06	4.24523e+06	4.07245e+06
1-Aminocyclopropane-1-Carboxylate	6.22103e+07	5.81441e+07	4.07256e+07	6.32456e+07	6.46131e+07	5.7106e+07	4.55414e+07	5.41117e+07	5.06687e+07	5.46632e+07
1H-Indole-4-Carboxaldehyde	4.19212e+06	5.84759e+06	3.50431e+06	5.74277e+06	5.75683e+06	9.30203e+06	6.21459e+06	4.96704e+06	5.82208e+06	6.62823e+06
1-Methyladenosine	1.7435e+07	2.17123e+07	1.07582e+07	1.70628e+07	1.7096e+07	2.31451e+08	1.95516e+08	3.26688e+07	9.84848e+07	1.8818e+08
1-Methylnicotinamide	2.07463e+08	3.28606e+08	1.32644e+08	1.40522e+08	1.83026e+08	4.54798e+09	1.11594e+09	2.37797e+08	4.17086e+08	8.33331e+08
2-Aminomuconic Acid Semialdehyde	6.91914e+06	4.09738e+06	2.57749e+06	3.92426e+06	3.50355e+06	5.72655e+06	5.38367e+06	5.26284e+06	5.9237e+06	3.72346e+06
2-Ethylacrylylcarnitine, Tiglylcarnitine	1.35246e+07	1.21362e+07	9.2397e+06	1.10271e+07	1.10738e+07	1.141e+07	9.23086e+06	7.85915e+06	9.41073e+06	1.18647e+07
2-Hydroxylauroylcarnitine	1.93419e+06	6.11825e+06	2.31344e+07	9.49109e+06	3.37134e+06	1.83616e+06	3.92894e+06	1.33859e+07	6.05683e+06	5.26595e+06
2-Hydroxymyristoylcarnitine	4.23517e+06	1.38285e+07	8.05668e+07	3.923e+07	1.25956e+07	6.71416e+06	1.15495e+07	3.797e+07	1.76261e+07	1.56412e+07
2-Hydroxypyridine	2.82806e+07	2.84466e+07	2.47224e+07	2.85608e+07	3.48297e+07	2.75295e+07	2.92176e+07	2.80492e+07	2.70092e+07	2.87146e+07
2-Methoxybenzoic Acid	8.41708e+06	5.05789e+06	3.91249e+06	4.12736e+06	8.32677e+06	2.33029e+06	2.16086e+06	1.16121e+06	2.024e+06	2.03962e+06
3,5-Dimethyl-P-Anisic Acid	734351	1.14435e+06	919803	992916	881966	6.38507e+06	6.99023e+06	1.59948e+06	2.40456e+06	5.0365e+06
3-Hydroxy-9-Hexadecenoylcarnitine	3.33185e+06	1.67583e+07	6.57345e+07	2.80242e+07	1.15102e+07	1.12187e+07	2.00706e+07	4.75462e+07	2.31556e+07	2.51729e+07
3-Hydroxyanthranilic Acid	5.77931e+06	1.15498e+07	4.88874e+06	6.92981e+06	7.97257e+06	6.37221e+07	3.4762e+07	8.19417e+06	1.68957e+07	3.17454e+07
3-Hydroxy-Cis-5-Tetradecenoylcarnitine	1.90916e+06	6.4958e+06	2.61747e+07	1.0459e+07	4.77699e+06	3.4711e+06	9.44129e+06	2.37499e+07	9.53186e+06	1.00333e+07
3-Hydroxydecanoyl Carnitine	5.85548e+06	1.09856e+07	2.81657e+07	1.42172e+07	1.04212e+07	7.5437e+06	1.27081e+07	2.1534e+07	1.64228e+07	1.63243e+07
3-Hydroxyhexadecadienoylcarnitine	4.80911e+06	1.07167e+07	5.4555e+07	2.66737e+07	9.63398e+06	6.8108e+06	1.06008e+07	3.47065e+07	1.35766e+07	1.45285e+07
3-Hydroxyhexadecanoylcarnitine	2.29451e+07	6.63819e+07	3.52876e+08	2.14087e+08	6.89461e+07	4.1722e+07	5.54839e+07	1.6036e+08	7.92018e+07	8.28342e+07
3-Hydroxyisovalerylcarnitine	1.29788e+08	1.00688e+08	1.01485e+08	1.66748e+08	1.76859e+08	1.08969e+08	9.05776e+07	1.29453e+08	1.09769e+08	1.07016e+08
3-Hydroxy-N6,N6,N6-Trimethyl-L-Lysine	3.08243e+07	3.71288e+07	2.57121e+07	4.82518e+07	4.77568e+07	1.44284e+08	9.1375e+07	7.08822e+07	6.72706e+07	6.07717e+07
3-Hydroxyoctanoyl Carnitine	9.29778e+06	1.51131e+07	3.8425e+07	1.64769e+07	1.10467e+07	6.3774e+06	1.4083e+07	2.32583e+07	1.47751e+07	1.27793e+07
3-Ketosphingosine	9.14822e+07	9.41916e+07	1.06504e+08	1.63952e+08	1.09155e+08	1.49703e+08	1.24793e+08	1.2724e+08	1.18387e+08	9.11319e+07
3-Methoxy-L-Tyrosine (L-3-O-Methyl-Dopa)	429024	423743	314725	497263	559113	604914	1.08412e+06	440356	615580	945263
3-Methoxytyramine	896329	1.07867e+06	1.07867e+06	1.0027e+06	1.34077e+06	4.86193e+06	3.43847e+06	1.30747e+06	3.41415e+06	3.50084e+06
3-Methyglutaric Acid	9.40758e+06	7.98605e+06	8.58195e+06	9.45151e+06	9.26394e+06	7.61032e+06	1.00433e+07	1.00938e+07	9.49882e+06	8.54224e+06
3-Methylglutarylcarnitine	4.05509e+07	4.3457e+07	1.02236e+08	1.10268e+08	8.06623e+07	5.51206e+07	5.77405e+08	3.50034e+08	4.02761e+08	5.03628e+08
3-Methylhistamine	4.55413e+07	5.46706e+07	2.5771e+07	3.61311e+07	2.95403e+07	1.60253e+09	1.17782e+09	2.0581e+08	4.4591e+08	9.82335e+08
3-Methylhistidine	6.49635e+08	8.21991e+08	2.98661e+08	9.58673e+08	5.69784e+08	6.02429e+08	2.59788e+08	1.35991e+09	4.19828e+08	3.23226e+08
3-Sulfino-L-Alanine	1.13558e+06	639754	522399	789885	666282	3.58047e+06	956623	1.23313e+06	1.45243e+06	892563
4,8-Dimethylnonanoyl Carnitine	2.74727e+06	2.64248e+06	3.44555e+06	5.67488e+06	3.51071e+06	6.71608e+06	4.25106e+06	4.23274e+06	3.95119e+06	2.7452e+06
4-Guanidinobutanoic Acid	8.02251e+07	7.34538e+07	1.0318e+07	3.73691e+07	2.60555e+07	1.7647e+07	6.3613e+06	4.04535e+06	9.39298e+06	1.09557e+07
4-Hydroxybenzyl Alcohol	3.04581e+07	2.75925e+07	2.38831e+07	2.79923e+07	3.36645e+07	2.65972e+07	2.80321e+07	2.62085e+07	2.651e+07	2.82528e+07
4-Hydroxyindole	7.7005e+06	1.83532e+07	2.75094e+06	3.66972e+06	5.58536e+06	9.37504e+06	1.1368e+07	1.3026e+07	7.36263e+07	2.55714e+08
4-Pyrimidine Methanamine	1.33292e+08	1.184e+08	1.05311e+08	1.40142e+08	1.29657e+08	2.23907e+08	1.64669e+08	1.34126e+08	1.64876e+08	1.62937e+08
4-Trimethylammoniobutanal	1.34911e+07	5.75314e+06	1.77578e+06	9.07763e+06	1.16621e+07	3.26043e+07	1.88843e+07	6.97563e+06	1.69673e+07	1.73926e+07
5,6-Dihydrouracil	1.18527e+08	6.60114e+07	4.01184e+07	7.28383e+07	5.97237e+07	5.85154e+08	2.07987e+08	1.16721e+08	3.71017e+08	1.85526e+08
5-Amino-1-[3,4-Dihydroxy-5-(Hydroxymethyl)Oxolan-2-Yl]Imidazole-4-Carboxamide	4.62601e+06	3.69913e+06	2.74784e+06	6.4637e+06	3.84376e+06	2.14302e+06	3.64421e+06	5.82603e+06	9.62016e+06	2.59417e+07
5-Aminoimidazole-4-Carboxamide-1-Beta-D-Ribofuranosyl 5'-Monophosphate	504124	235371	246660	384115	352233	487082	645158	1.40755e+06	1.53043e+06	4.96941e+06
5-Hydroxylysine	1.86615e+06	1.36865e+06	738796	1.79887e+06	2.61727e+06	1.55269e+06	955469	915283	748959	715525
5-Methoxytryptophol	1.81991e+06	2.34443e+06	3.41663e+06	2.79786e+06	1.80357e+06	1.79371e+06	1.6031e+06	1.54638e+06	1.51965e+06	2.0921e+06
5'-Methylthioadenosine	2.12869e+08	1.57819e+08	1.6399e+08	1.33855e+08	1.70477e+08	1.37382e+08	1.60849e+08	1.99603e+08	1.82577e+08	1.86429e+08
5'-Phosphoribosyl-N-Formylglycinamide	834941	388455	246361	268514	434500	254298	343426	1.03059e+06	357599	568479
7-Methyladenine	6.10446e+06	7.9656e+06	3.90142e+06	5.7731e+06	6.01081e+06	7.92227e+07	6.80363e+07	1.16754e+07	3.47015e+07	6.59486e+07
7-Methylguanine	3.94572e+07	5.32864e+07	2.08328e+07	3.07612e+07	3.48317e+07	2.15315e+08	1.80305e+08	4.79521e+07	1.29489e+08	1.95164e+08
9,12-Hexadecadienoylcarnitine	1.45732e+07	2.69081e+07	7.76765e+07	4.47603e+07	2.0579e+07	1.51262e+07	1.39553e+07	5.29719e+07	2.57373e+07	2.21895e+07
Acetoacetate	4.09237e+07	4.73087e+07	4.01568e+07	4.71283e+07	5.0953e+07	3.80551e+07	4.19384e+07	4.79378e+07	4.71736e+07	5.03803e+07
Acylcarnitine(12:1)	5.01808e+06	7.92073e+06	2.17335e+07	1.20491e+07	1.02316e+07	2.46372e+06	4.97625e+06	1.24737e+07	9.42369e+06	1.21502e+07
Acylcarnitine(12:2)	1.13089e+06	1.36391e+06	2.69024e+06	1.73716e+06	2.05084e+06	664767	453384	1.67383e+06	1.20964e+06	1.2799e+06
Acylcarnitine(20:1)	7.09196e+06	2.54343e+07	4.0838e+07	3.88123e+07	1.41572e+07	2.85626e+07	3.26039e+07	3.93437e+07	2.86374e+07	2.45788e+07
Acylcarnitine(20:2)	7.53238e+06	2.83154e+07	4.50734e+07	4.12699e+07	1.42409e+07	2.23502e+07	2.21801e+07	4.23024e+07	2.33493e+07	1.83496e+07
Acylcarnitine(20:4)	7.93898e+07	1.38786e+08	1.3382e+08	1.61455e+08	1.11099e+08	9.60495e+07	6.75008e+07	1.27424e+08	9.78671e+07	1.15341e+08
Acylcarnitine(20:5)	4.09077e+06	7.28662e+06	1.12314e+07	1.32582e+07	7.58542e+06	1.12125e+07	3.67524e+06	1.38494e+07	9.11344e+06	1.10528e+07
Acylcarnitine(22:4)	1.30821e+06	5.67753e+06	6.65299e+06	1.04127e+07	2.57843e+06	2.75469e+06	2.02567e+06	7.67455e+06	3.78821e+06	3.62128e+06
Acylcarnitine(22:6)	1.95308e+07	2.29617e+07	2.45385e+07	3.83329e+07	2.48136e+07	2.65203e+07	8.57392e+06	2.97532e+07	2.07327e+07	2.91839e+07
Adenosine	5.38002e+08	3.86407e+08	1.5609e+08	2.07455e+08	3.78114e+08	1.78333e+07	2.06689e+08	1.96815e+08	1.51693e+07	3.03259e+07
Adenylsuccinic Acid	1.95007e+06	3.40003e+06	5.56718e+06	4.58779e+06	2.23215e+06	4.20915e+06	4.60175e+06	9.39286e+06	6.0629e+06	8.06035e+06
ADP	3.07282e+06	3.95049e+06	3.81026e+06	5.11733e+06	2.60391e+06	755894	730812	2.21828e+06	1.70409e+06	883158
Ala-Arg	1.97437e+07	1.7237e+07	1.32209e+07	2.7014e+07	3.41627e+07	3.25728e+07	3.5203e+07	3.06354e+07	2.61297e+07	1.91472e+07
Ala-Asn	1.46523e+06	913274	485624	985326	1.5956e+06	1.19298e+06	1.05387e+06	1.22384e+06	985028	751168
Ala-Phe	2.19662e+06	2.16161e+06	1.69288e+06	2.81189e+06	3.7331e+06	6.23339e+06	5.52767e+06	5.38675e+06	4.07181e+06	3.07252e+06
Alpha-Aminoadipate	3.0681e+08	2.88302e+08	2.41713e+08	2.41708e+08	1.44135e+08	1.83119e+08	2.55981e+08	3.84427e+08	2.27797e+08	1.98299e+08
Alpha-Linolenic Acid	3.07432e+07	3.34422e+07	4.00673e+07	6.04194e+07	3.99534e+07	5.56754e+07	4.88864e+07	4.79723e+07	4.08152e+07	3.24912e+07
Arg-Ala	1.97437e+07	1.7237e+07	1.32209e+07	2.7014e+07	3.41627e+07	3.25728e+07	3.5203e+07	3.06354e+07	2.61297e+07	1.91472e+07
Arg-Asn	5.75e+06	3.1301e+06	1.77284e+06	5.59062e+06	8.2544e+06	1.14879e+07	7.76712e+06	4.91759e+06	6.17659e+06	3.78338e+06
Arg-Gln	1.58593e+06	2.00797e+06	1.4955e+06	3.72436e+06	1.8313e+06	1.55524e+06	861680	2.23426e+06	1.35533e+06	757405
Arg-Gly	1.28334e+06	1.76005e+06	1.46082e+06	4.08483e+06	2.46014e+06	1.71046e+06	1.7141e+06	2.22443e+06	1.51365e+06	1.01045e+06
Arg-Ile	7.85576e+06	8.9114e+06	6.17531e+06	1.4335e+07	1.41724e+07	1.27127e+07	1.33149e+07	2.09719e+07	1.00296e+07	8.72219e+06
Argininosuccinic Acid	2.9635e+06	3.8936e+06	2.8465e+06	3.97374e+06	3.42095e+06	4.97608e+06	6.3253e+06	3.53622e+06	4.56534e+06	6.66563e+06
Arg-Leu	7.85576e+06	8.9114e+06	6.17531e+06	1.4335e+07	1.41724e+07	1.27127e+07	1.33149e+07	2.09719e+07	1.00296e+07	8.72219e+06
Arg-Phe	1.87803e+06	1.53547e+06	747717	2.84904e+06	2.76017e+06	4.70409e+06	2.89159e+06	3.88035e+06	2.7794e+06	1.64963e+06
Arg-Tyr	1.36891e+06	1.2705e+06	923362	2.04732e+06	1.45997e+06	1.07023e+06	1.44186e+06	1.6134e+06	1.17206e+06	734887
Arg-Val	3.80082e+06	2.55489e+06	2.00785e+06	3.77627e+06	3.8141e+06	5.1756e+06	4.86313e+06	4.06551e+06	3.601e+06	2.40778e+06
Ascorbic Acid/Monodehydroascorbate	2.30621e+06	2.79754e+06	1.49339e+06	2.0034e+06	3.62638e+06	2.83694e+07	2.71907e+07	3.77815e+06	9.79758e+06	1.76865e+07
Asn-Arg	5.75e+06	3.1301e+06	1.77284e+06	5.59062e+06	8.2544e+06	1.14879e+07	7.76712e+06	4.91759e+06	6.17659e+06	3.78338e+06
Asp-Gly	1.47867e+06	1.50663e+06	1.07944e+06	1.7116e+06	1.68172e+06	3.85627e+06	2.50104e+06	1.82163e+06	2.20111e+06	2.23129e+06
Asp-Lys	8.89585e+06	1.4068e+07	1.03312e+07	2.12341e+07	1.657e+07	6.96808e+06	6.02457e+06	5.63088e+06	3.8781e+06	4.69365e+06
Asymmetric Dimethylarginine	2.28481e+08	2.39564e+08	1.52783e+08	1.9536e+08	3.82714e+08	4.03162e+08	3.35826e+08	1.92938e+08	2.76668e+08	2.87791e+08
Betaine Aldehyde	6.7461e+07	7.75988e+07	6.63384e+07	7.73781e+07	7.61575e+07	6.4905e+07	6.90938e+07	7.93009e+07	7.78849e+07	8.0147e+07
Beta-Nicotinamide Adenine Dinucleotide Hydrate (NAD)	5.28183e+07	6.76803e+07	6.92634e+07	8.98575e+07	3.87587e+07	1.33737e+07	1.15142e+07	4.12234e+07	2.37429e+07	1.3827e+07
Bilirubin	2.12761e+06	2.55566e+06	7.82318e+06	3.76892e+06	3.7032e+06	8.81941e+06	6.54782e+06	6.24665e+06	7.37253e+06	1.13423e+07
Biotin	1.8901e+06	1.50158e+06	832136	1.35288e+06	2.55252e+06	9.68383e+06	2.87032e+06	2.61414e+06	5.28798e+06	1.00992e+07
C18:1-OH Carnitine	7.88782e+06	3.22115e+07	1.13749e+08	5.86309e+07	2.31993e+07	3.24945e+07	4.33862e+07	9.92283e+07	4.26796e+07	4.42895e+07
C18:2-OH Carnitine	7.23506e+06	2.16177e+07	9.00673e+07	4.38709e+07	1.82635e+07	2.51212e+07	2.38408e+07	6.74785e+07	2.63939e+07	2.45976e+07
C20:1-OH Carnitine	1.67515e+06	6.55125e+06	1.6534e+07	8.84663e+06	5.01953e+06	1.00643e+07	1.16602e+07	1.43897e+07	9.53307e+06	9.76953e+06
C20:2-OH Carnitine	2.05324e+06	7.41466e+06	1.86898e+07	1.02773e+07	4.23145e+06	7.96837e+06	7.46757e+06	1.55e+07	7.02448e+06	6.60581e+06
C20:4-OH Carnitine	3.8056e+06	7.99804e+06	1.63459e+07	2.09923e+07	7.89709e+06	4.36812e+06	3.57502e+06	1.11314e+07	5.4541e+06	5.28804e+06
C22:2-OH Carnitine	1589250	1.05255e+06	2.58431e+06	1.79971e+06	927282	2.31622e+06	2.80514e+06	2.1513e+06	2.18547e+06	1.73919e+06
C22:5-OH Carnitine	1.87654e+06	2.93437e+06	6.64945e+06	7.83324e+06	4.26855e+06	5.93883e+06	1.48137e+06	6.4384e+06	3.34325e+06	2.23527e+06
Caproylcholine	1.85985e+07	1.97016e+07	2.00812e+07	2.0666e+07	2.07704e+07	1.93984e+07	2.02645e+07	2.20537e+07	2.16131e+07	2.20555e+07
Carnosine	4.97018e+07	4.12423e+07	2.09081e+07	5.93299e+07	3.94271e+07	4.61076e+07	7.07623e+07	7.12539e+07	1.04231e+08	6.50452e+07
CDP-Ethanolamine	5.82829e+06	6.09058e+06	6.3044e+06	6.12345e+06	5.92291e+06	7.08402e+06	6.3489e+06	7.67396e+06	6.60659e+06	7.01757e+06
Cholesterol-H2O	2.65622e+06	2.63271e+06	3.42641e+06	2.51799e+06	2.41534e+06	2.7023e+06	2.25898e+06	2.15112e+06	2.16783e+06	3.35284e+06
Choline	1.56232e+10	1.68607e+10	1.36217e+10	1.9339e+10	2.29206e+10	2.15458e+10	2.00819e+10	1.62984e+10	1.95574e+10	2.22021e+10
Cis-5-Tetradecenoylcarnitine	1.1853e+07	3.44262e+07	8.20071e+07	4.49135e+07	2.9763e+07	1.0929e+07	1.77721e+07	5.84527e+07	3.3964e+07	3.33228e+07
Citraconic Acid	1.7061e+06	1.70356e+06	623386	1.62735e+06	1.77232e+06	1.73484e+06	1.08556e+06	1.45278e+06	1.69647e+06	1.65839e+06
CMP-N-Glycoloylneuraminate	1.78238e+06	1.963e+06	1.32633e+06	1.90536e+06	1.78599e+06	3.78076e+06	4.20031e+06	4.02082e+06	4.05433e+06	3.40513e+06
Corticosterone	1.34733e+06	1.08202e+06	1.47148e+06	2.43563e+06	1.25342e+06	8.95014e+06	7.92083e+06	6.36442e+06	6.2721e+06	8.70889e+06
Cortisol	951850	2.46614e+06	3.18623e+06	1.11007e+06	877858	9.08066e+06	6.43605e+06	6.06375e+06	4.54273e+06	3.44828e+06
Cys-Ala	4.36948e+06	2.29199e+06	1.74064e+06	2.78794e+06	3.11534e+06	2.41051e+06	2.07388e+06	2.74392e+06	2.29103e+06	1.97318e+06
Cytidine 5'-Diphosphocholine	3.99984e+07	4.5794e+07	5.35446e+07	4.65139e+07	4.45453e+07	5.874e+07	4.45704e+07	6.51873e+07	4.98793e+07	5.17474e+07
Dantron	515596	948178	859211	718741	899576	1.75509e+06	1.84535e+06	1.10355e+06	1.42508e+06	1.47184e+06
Decanoylcarnitine	1.92538e+07	2.518e+07	3.69675e+07	3.13916e+07	3.50043e+07	9.38691e+06	1.04037e+07	2.90005e+07	2.27767e+07	2.29551e+07
Decenoylcarnitine(C10:1)	7.9236e+06	9.56117e+06	1.32161e+07	1.20155e+07	8.8017e+06	4.07988e+06	4.18811e+06	1.18448e+07	7.29137e+06	7.48483e+06
Deoxyadenosine	6.26538e+06	4.87188e+06	3.03445e+06	4.4004e+06	6.56027e+06	4.04935e+06	4.34478e+06	3.92771e+06	3.43225e+06	3.66194e+06
Deoxyinosine	3.0925e+06	3.14487e+06	2.44203e+06	2.78444e+06	3.15241e+06	9.63922e+06	1.18696e+07	6.76888e+06	9.08888e+06	9.9743e+06
Desaminotyrosine	725991	925892	306223	567570	516458	3.54601e+06	3.21592e+06	789588	2.17261e+06	3.27879e+06
D-Glucosamine 6-Phosphate	3.2511e+06	4.7707e+06	1.24034e+06	6.69508e+06	5.8925e+06	8.72565e+06	1.0702e+07	7.12488e+06	9.3606e+06	1.05707e+07
D-Glutamylglycine	2.01615e+08	1.18268e+08	7.51454e+07	1.12555e+08	9.52795e+07	1.69213e+08	1.53658e+08	1.55672e+08	1.66832e+08	1.09513e+08
Diethanolamine	2.71684e+07	1.95091e+07	2.70506e+07	2.51565e+07	2.81034e+07	1.99772e+07	1.77242e+07	2.34174e+07	2.28165e+07	2.09498e+07
Dimethylurea	6.597e+07	7.33702e+07	6.34836e+07	6.6177e+07	6.315e+07	7.48174e+07	4.80847e+07	6.80644e+07	6.95915e+07	6.92234e+07
DL-Stearoylcarnitine	5.38174e+07	1.08323e+08	1.94357e+08	1.3293e+08	6.89176e+07	7.72754e+07	7.40999e+07	1.06991e+08	1.00014e+08	7.65856e+07
Elaidic Carnitine	5.9961e+07	2.0753e+08	3.48073e+08	2.40542e+08	1.23429e+08	1.43681e+08	1.9382e+08	3.76824e+08	2.26475e+08	2.39908e+08
Epinephrine	1.44513e+07	1.61207e+07	7.67798e+06	1.52218e+07	1.28988e+07	3.34911e+07	2.59858e+07	2.41847e+07	2.43981e+07	2.19558e+07
Ergothioneine	7.76226e+07	1.72859e+08	3.1115e+08	1.31742e+08	1.78218e+08	2.25184e+08	2.23164e+08	1.30958e+08	1.28126e+08	1.62971e+08
Ethanolamine Phosphate	1.00512e+08	1.45138e+08	1.3608e+08	1.5114e+08	1.50078e+08	2.13104e+08	1.82942e+08	1.95007e+08	1.68571e+08	1.86913e+08
Flavin Mononucleotide	2.31093e+06	3.97741e+06	2.84744e+06	3.03418e+06	1.81076e+06	8.03959e+06	1.70357e+06	6.94105e+06	1.05639e+07	1.12229e+07
Gama-Aminobutryic Acid	5.75434e+07	6.36668e+07	8.65099e+07	7.41651e+07	6.91803e+07	1.30184e+08	1.16045e+08	1.65427e+08	1.35614e+08	1.34645e+08
Gamma Glutamylglutamic Acid	9.97758e+07	7.29317e+07	3.79191e+07	4.45569e+07	2.02483e+07	5.21607e+07	6.89388e+07	1.00496e+08	7.1028e+07	5.53354e+07
Gln-Arg	1.58593e+06	2.00797e+06	1.4955e+06	3.72436e+06	1.8313e+06	1.55524e+06	861680	2.23426e+06	1.35533e+06	757405
Gln-Gln	1.63384e+06	1.21312e+06	835911	1.45323e+06	1.45752e+06	1.78594e+06	1.71762e+06	1.22096e+06	1.06951e+06	704585
Glu-Asp	3.06002e+06	1.77028e+06	1.07987e+06	1.47016e+06	1.70875e+06	1.39293e+06	948771	2.5418e+06	2.10803e+06	1.74233e+06
Glu-Gln	2.50813e+07	1.95385e+07	1.40707e+07	1.30959e+07	5.29863e+06	1.92065e+07	1.84105e+07	1.46557e+07	1.22158e+07	8.10572e+06
Glu-Met	1.59483e+06	1.24893e+06	604595	922787	684692	1.32398e+06	1.66403e+06	949880	1.11299e+06	716077
Glutamylphenylalanine	8.18234e+06	6.28899e+06	3.2086e+06	5.48166e+06	5.42846e+06	7.42507e+06	5.97089e+06	5.66769e+06	5.62921e+06	5.68164e+06
Gly-Arg	1.28334e+06	1.76005e+06	1.46082e+06	4.08483e+06	2.46014e+06	1.71046e+06	1.7141e+06	2.22443e+06	1.51365e+06	1.01045e+06
Glycerol 2-Phosphate	1.912e+07	3.38263e+07	2.38351e+07	4.1984e+07	4.54876e+07	4.87568e+07	5.55858e+07	3.13406e+07	3.59236e+07	5.21939e+07
Glycerylphosphorylethanolamine	1.68032e+08	2.33867e+08	2.58864e+08	2.70535e+08	2.17516e+08	1.71569e+08	2.08552e+08	2.30043e+08	1.66727e+08	1.80849e+08
Guanidineacetic Acid	1.62169e+08	1.75559e+08	1.25816e+08	1.91723e+08	1.54412e+08	1.46164e+08	1.0222e+08	6.69311e+07	6.42202e+07	5.70677e+07
Guanosine 5'-Diphosphate	909013	980671	939441	783085	762535	829166	636899	972266	859629	816622
Guanosine 5'-Monophosphate	1.93179e+07	2.31998e+07	2.65653e+07	2.45833e+07	1.75277e+07	2.0991e+07	2.22069e+07	3.22521e+07	1.8978e+07	1.63939e+07
Hexanoylcarnitine	5.38216e+07	1.1957e+08	1.32479e+08	1.37819e+08	8.62641e+07	3.43858e+07	4.00361e+07	1.21846e+08	6.5381e+07	7.63341e+07
Hexanoylglycine	4.85922e+06	5.36046e+06	5.74653e+06	7.26186e+06	4.57551e+06	6.07469e+06	8.37708e+06	8.24915e+06	1.34937e+07	1.14685e+07
His-Gly	2.96199e+06	2.6808e+06	1.65137e+06	2.54451e+06	5.16391e+06	7.97024e+06	7.44261e+06	4.24769e+06	5.22636e+06	5.09867e+06
Histamine	7.08465e+06	8.62094e+06	6.78621e+06	9.28598e+06	6.57172e+06	4.26817e+07	3.17494e+07	1.43659e+07	1.75925e+07	1.98735e+07
His-Thr	2.46325e+06	2.49944e+06	1.20831e+06	3.19226e+06	6.03109e+06	8.22286e+06	6.62589e+06	3.3481e+06	4.53256e+06	3.62052e+06
Homoveratric Acid	296766	539205	461274	472650	373046	803919	547049	562971	993118	857296
Hydroxybutyrylcarnitine	1.40301e+08	2.35553e+08	3.97849e+08	2.91177e+08	2.58686e+08	1.66951e+08	4.57236e+08	3.73202e+08	3.12624e+08	3.26209e+08
Ile-Arg	7.85576e+06	8.9114e+06	6.17531e+06	1.4335e+07	1.41724e+07	1.27127e+07	1.33149e+07	2.09719e+07	1.00296e+07	8.72219e+06
Ile-His	2.20095e+06	1.66176e+06	737935	1.88339e+06	2.51152e+06	3.86269e+06	2.86373e+06	3.10474e+06	1.95201e+06	1.61022e+06
Ile-Lys	4.4984e+06	5.95984e+06	5.27221e+06	5.60024e+06	5.11854e+06	3.07856e+07	2.39703e+07	1.55939e+07	9.9726e+06	1.55766e+07
Indole	1.99788e+08	2.0639e+08	2.04959e+08	2.3513e+08	2.41772e+08	2.08124e+08	2.48564e+08	2.35574e+08	2.31399e+08	2.00469e+08
Indole-3-Ethanol	1.3231e+07	1.24045e+07	1.2358e+07	1.22966e+07	1.4206e+07	1.13162e+07	1.49521e+07	1.16629e+07	1.37216e+07	1.23985e+07
Indoleacetaldehyde	2.92514e+06	2.67986e+07	3.60333e+07	2.6138e+07	1.70703e+07	1.45205e+07	1.288e+07	7.25801e+06	2.5652e+06	1.8089e+07
Indoleacrylic Acid	4.0994e+07	5.81569e+07	3.39659e+07	5.70461e+07	5.69906e+07	8.87211e+07	5.9687e+07	4.62081e+07	5.64044e+07	6.03312e+07
Inosine 5'-Monophosphate (IMP, Inosinic Acid)	2.17026e+07	3.66841e+07	4.41627e+07	3.49953e+07	3.50276e+07	9.51183e+07	5.88162e+07	7.59221e+07	6.6103e+07	5.72113e+07
IS-Met-D3	3.69211e+07	3.71958e+07	3.44747e+07	3.56782e+07	3.75998e+07	3.60561e+07	3.60938e+07	3.46627e+07	3.79143e+07	3.85256e+07
Isobutyryl Carnitine	2.27903e+08	7.11945e+08	5.60289e+08	6.28215e+08	3.85215e+08	4.3126e+08	3.54461e+08	6.90501e+08	5.19836e+08	5.14742e+08
IS-Phe-D8	3.55046e+08	3.7094e+08	3.38728e+08	3.77156e+08	3.93033e+08	3.90449e+08	3.88029e+08	3.64492e+08	3.89905e+08	4.11073e+08
IS-Trp-D5	8.39459e+07	8.85818e+07	8.34295e+07	8.96057e+07	9.32918e+07	9.05896e+07	9.1686e+07	8.86303e+07	9.02062e+07	9.79054e+07
IS-Tyr-D4	2.18439e+07	4.97086e+07	9.25348e+07	3.83448e+07	5.25648e+07	6.79825e+07	6.57033e+07	3.84397e+07	3.76915e+07	4.82285e+07
Itaconic Acid	1.7061e+06	1.70356e+06	623386	1.62735e+06	1.77232e+06	1.73484e+06	1.08556e+06	1.45278e+06	1.69647e+06	1.65839e+06
Kinetin	3.41023e+06	2.61429e+06	545013	1.76478e+06	1.41095e+06	4.41574e+06	2.87262e+06	984428	2.14578e+06	4.78539e+06
Kynurenic Acid	4.61518e+06	3.71391e+06	2.20495e+06	4.28611e+06	4.3468e+06	1.64007e+07	1.66467e+07	1.11977e+07	3.32369e+07	3.94513e+07
L-Alanine	1.7184e+08	1.37892e+08	1.11543e+08	1.57242e+08	1.62911e+08	2.59231e+08	2.11249e+08	1.99248e+08	2.25253e+08	2.02908e+08
L-A-Lysophosphatidylserine	1.47859e+06	1.27927e+06	800533	865917	957098	1.15421e+06	942956	1.89483e+06	1.71437e+06	2.38753e+06
L-Arginine	6.7786e+08	6.18017e+08	3.89767e+08	6.54493e+08	8.1233e+08	8.26447e+08	7.19094e+08	4.95873e+08	6.83248e+08	6.07627e+08
L-Asparagine	2.29722e+08	1.33122e+08	8.174e+07	1.47223e+08	1.21751e+08	1.161e+09	4.21887e+08	2.31409e+08	7.47959e+08	3.74604e+08
Lauroylcarnitine	9.8443e+06	2.64269e+07	7.72008e+07	4.65789e+07	2.44074e+07	7.87438e+06	1.09535e+07	4.61267e+07	2.36296e+07	2.59765e+07
L-Cysteine	4.81763e+06	2.38856e+06	2.2142e+06	3.64598e+06	4.35465e+06	5.46066e+06	3.35088e+06	4.39684e+06	3.61118e+06	2.74028e+06
Leu-Arg	7.85576e+06	8.9114e+06	6.17531e+06	1.4335e+07	1.41724e+07	1.27127e+07	1.33149e+07	2.09719e+07	1.00296e+07	8.72219e+06
Leu-His	2.20095e+06	1.66176e+06	737935	1.88339e+06	2.51152e+06	3.86269e+06	2.86373e+06	3.10474e+06	1.95201e+06	1.61022e+06
Leu-Lys	4.4984e+06	5.95984e+06	5.27221e+06	5.60024e+06	5.11854e+06	3.07856e+07	2.39703e+07	1.55939e+07	9.9726e+06	1.55766e+07
L-Gamma-Glutamyl-L-Isoleucine	2.94031e+07	2.49712e+07	1.59054e+07	2.51899e+07	2.14604e+07	3.97089e+07	2.7526e+07	2.30765e+07	2.44858e+07	2.72739e+07
L-Gamma-Glutamyl-L-Leucine	2.94031e+07	2.49712e+07	1.59054e+07	2.51899e+07	2.14604e+07	3.97089e+07	2.7526e+07	2.30765e+07	2.44858e+07	2.72739e+07
L-Gamma-Glutamyl-L-Valine	1.18483e+07	8.07134e+06	4.68514e+06	1.04769e+07	1.02231e+07	1.21355e+07	6.76411e+06	8.98194e+06	9.23888e+06	7.12247e+06
L-Histidine	4.79286e+08	4.39368e+08	3.60584e+08	5.29091e+08	4.87196e+08	7.97412e+08	6.00556e+08	5.03867e+08	6.18842e+08	6.23937e+08
Linoelaidyl Carnitine; Acylcarnitine C18:2	7.00853e+07	1.51506e+08	2.83889e+08	2.19045e+08	1.26548e+08	1.29648e+08	1.47243e+08	3.05416e+08	1.84364e+08	2.26612e+08
Linoleoyl Ethanolamide	1.78073e+07	2.23406e+07	2.48109e+07	3.68446e+07	2.43606e+07	3.36978e+07	2.80966e+07	2.65694e+07	2.52125e+07	2.28505e+07
LL-2,6-Diaminoheptanedioate	3.09701e+06	3.1708e+06	2.16942e+06	4.00266e+06	3.05618e+06	5.58364e+06	2.62324e+06	4.14589e+06	3.42877e+06	2.52167e+06
L-Leucine	4.08807e+08	3.90987e+08	2.61032e+08	4.40391e+08	5.8074e+08	8.70214e+08	5.41554e+08	3.80584e+08	4.84724e+08	5.22644e+08
L-Lysine	1.56969e+08	1.3819e+08	8.04263e+07	1.77586e+08	2.12102e+08	2.93888e+08	2.08804e+08	1.28672e+08	1.77335e+08	1.72415e+08
L-Methionine S-Oxide	7.5812e+06	2.18891e+06	609255	1.73899e+06	1.21506e+06	1.10944e+06	658353	588206	634964	556754
L-Octanoylcarnitine	2.75702e+07	4.01377e+07	4.66654e+07	4.73406e+07	3.83147e+07	1.22747e+07	1.0506e+07	3.4946e+07	2.36153e+07	2.37264e+07
L-Palmitoylcarnitine	1.53751e+08	4.71316e+08	1.29165e+09	8.07116e+08	3.27951e+08	2.14267e+08	2.92388e+08	8.28595e+08	5.31113e+08	4.30439e+08
L-Pipecolic Acid	6.18465e+07	5.45872e+07	3.1926e+07	6.90337e+07	8.46082e+07	1.16891e+08	8.0846e+07	4.97415e+07	7.00658e+07	6.66385e+07
L-Proline	3.86496e+08	3.54237e+08	2.32757e+08	3.55898e+08	5.22586e+08	6.7472e+08	5.39505e+08	3.79747e+08	4.95821e+08	5.17715e+08
L-Tryptophan	3.36581e+07	4.73474e+07	2.74082e+07	4.55976e+07	4.64277e+07	7.07456e+07	4.91268e+07	3.66989e+07	4.47059e+07	4.90486e+07
Lys-Asp	8.89585e+06	1.4068e+07	1.03312e+07	2.12341e+07	1.657e+07	6.96808e+06	6.02457e+06	5.63088e+06	3.8781e+06	4.69365e+06
LysoPC(14:0)	8.23297e+06	1.07745e+07	1.17999e+07	1.16463e+07	1.02041e+07	7.58308e+06	7.16849e+06	5.67655e+06	6.68633e+06	9.9655e+06
LysoPC(16:0)	3.34676e+09	3.22706e+09	3.11925e+09	3.47965e+09	3.32073e+09	2.07607e+09	1.94988e+09	2.12773e+09	2.08285e+09	1.88716e+09
LysoPC(16:1)	2.94012e+07	3.24931e+07	2.64838e+07	3.59947e+07	2.96269e+07	1.48985e+07	2.69923e+07	1.85837e+07	2.08089e+07	3.05645e+07
LysoPC(17:0)	5.46563e+07	4.47632e+07	7.03226e+07	6.1389e+07	5.3629e+07	3.67501e+07	2.39647e+07	2.25953e+07	1.93469e+07	1.56787e+07
LysoPC(17:1)	2.76563e+06	2.87243e+06	4.731e+06	3.72537e+06	4.6221e+06	1.35816e+06	1.86211e+06	1.75978e+06	1.37388e+06	1.5694e+06
LysoPC(18:0)	1.17121e+09	1.3474e+09	1.19823e+09	1.09956e+09	9.80163e+08	1.00915e+09	8.07153e+08	6.96671e+08	6.01905e+08	5.45824e+08
LysoPC(18:1)	2.87703e+08	3.9882e+08	4.99163e+08	3.69729e+08	3.53153e+08	2.67291e+08	2.40669e+08	2.15643e+08	1.65997e+08	1.99268e+08
LysoPC(18:2)	4.92597e+08	5.04068e+08	4.39242e+08	5.86551e+08	5.20917e+08	3.9494e+08	4.27327e+08	3.13337e+08	2.65721e+08	2.74388e+08
LysoPC(18:3)	5.66446e+07	5.52309e+07	5.5014e+07	5.61681e+07	5.50273e+07	3.62358e+07	3.84309e+07	4.13879e+07	4.41681e+07	3.80906e+07
LysoPC(19:0)	1.91231e+07	1.43259e+07	2.63643e+07	2.17212e+07	1.63941e+07	9.63218e+06	4.64972e+06	4.33821e+06	3.67405e+06	2.29119e+06
LysoPC(19:1)	1.42881e+06	1.73398e+06	2.7855e+06	2.29137e+06	2.00915e+06	1.96064e+06	1.09175e+06	997741	670323	624073
LysoPC(20:0)	1.68461e+07	9.12686e+06	1.02285e+07	1.36181e+07	1.44086e+07	4.71727e+06	2.92957e+06	4.76518e+06	4.93285e+06	2.64367e+06
LysoPC(20:1)	1.2497e+07	1.50721e+07	1.49601e+07	1.58516e+07	1.58909e+07	1.14264e+07	5.82093e+06	6.96168e+06	5.79515e+06	6.25408e+06
LysoPC(20:2)	1.44885e+07	1.52814e+07	1.61857e+07	1.46453e+07	1.66592e+07	1.70765e+07	7.6939e+06	9.12933e+06	7.77331e+06	7.42032e+06
LysoPC(20:4)	1.76627e+08	2.0585e+08	1.35531e+08	1.8026e+08	1.9683e+08	1.49204e+08	8.06099e+07	8.94187e+07	6.77217e+07	8.06348e+07
LysoPC(22:1)	1.42508e+06	1.58196e+06	1.41582e+06	1.92903e+06	1.52052e+06	1.38976e+06	801113	592482	757580	618421
LysoPC(22:4)	2.23872e+06	3.32066e+06	2.45341e+06	2.55706e+06	2.37793e+06	3.39944e+06	1.76932e+06	2.39783e+06	2.09861e+06	2.33548e+06
LysoPC(22:6)	2.53916e+08	2.01432e+08	1.39074e+08	2.02654e+08	2.64765e+08	2.27349e+08	1.07525e+08	1.1644e+08	9.43883e+07	9.35567e+07
LysoPE(16:0)	2.31476e+07	2.07403e+07	1.6043e+07	1.52936e+07	1.54989e+07	1.15436e+07	1.68072e+07	1.30037e+07	1.35036e+07	1.57056e+07
LysoPE(18:1)	2.70664e+07	2.80574e+07	1.69792e+07	2.09842e+07	2.62609e+07	3.5281e+07	2.89621e+07	1.9486e+07	2.04503e+07	3.20175e+07
LysoPE(18:2)	1.17081e+07	9.61709e+06	7.85148e+06	1.0994e+07	1.18463e+07	1.31161e+07	1.409e+07	9.07411e+06	9.51505e+06	1.21277e+07
LysoPE(20:4)	5.5897e+07	4.54506e+07	3.06936e+07	4.35501e+07	6.27586e+07	6.1271e+07	4.62684e+07	3.3152e+07	3.80036e+07	4.71756e+07
LysoPE(22:6)	7.88322e+07	6.7858e+07	4.64716e+07	8.17256e+07	8.14976e+07	3.56258e+07	3.05389e+07	4.46575e+07	3.76721e+07	4.15265e+07
Lys-Ser	1.94228e+06	1.24797e+06	909160	2.64863e+06	3.06734e+06	5.9036e+06	3.85779e+06	3.93559e+06	3.18612e+06	1.67285e+06
Malonylcarnitine	3.24646e+06	3.92679e+06	2.98608e+06	4.51715e+06	6.15781e+06	2.1803e+07	1.36126e+07	3.87556e+06	5.39515e+06	6.15171e+06
Melamine	2.67019e+06	1.82782e+06	2.68321e+06	3.22994e+06	5.69033e+06	2.50619e+06	2.7181e+06	4.48845e+06	2.42511e+06	3.14239e+06
Met-Glu	1.59483e+06	1.24893e+06	604595	922787	684692	1.32398e+06	1.66403e+06	949880	1.11299e+06	716077
METHACHOLINE-Like	5.93401e+09	4.55287e+09	2.59614e+09	4.6688e+09	5.26001e+09	6.62721e+09	4.95931e+09	4.64941e+09	5.77234e+09	6.39602e+09
Methylguanidine	7.47474e+06	6.10209e+06	1.61778e+06	5.22451e+06	3.29356e+06	7.19332e+06	5.80307e+06	8.49165e+06	1.10012e+07	1.43316e+07
Myristoylcarnitine	3.27328e+07	1.19576e+08	3.99952e+08	2.12909e+08	9.57157e+07	3.92544e+07	5.63358e+07	2.22875e+08	1.25416e+08	1.08941e+08
N-(3-Acetamidopropyl)Pyrrolidin-2-One	1.85603e+07	2.48589e+07	2.09196e+07	2.51428e+07	2.56962e+07	2.51072e+07	2.4529e+07	2.34351e+07	2.25294e+07	2.53956e+07
N1-Acetylspermidine	5.87727e+07	4.6756e+07	3.56743e+07	5.60718e+07	4.97695e+07	1.24196e+09	6.92736e+08	4.05256e+08	6.1803e+08	4.69904e+08
N6,N6,N6-Trimethyl-L-Lysine	7.57437e+07	1.05359e+08	7.73719e+07	1.12482e+08	9.80054e+07	3.25698e+08	3.31665e+08	3.97214e+08	5.5013e+08	5.6701e+08
N-Acetyl-DL-Methionine	1.01383e+07	6.00078e+06	4.17782e+06	8.00505e+06	1.34154e+07	1.348e+07	1.02286e+07	7.60209e+06	9.84288e+06	9.09185e+06
N-Acetylglutamine	6.404e+06	7.51242e+06	4.41002e+06	5.88451e+06	7.98039e+06	7.63408e+06	6.12713e+06	1.0239e+07	9.1752e+06	1.18287e+07
N-Acetylhistidine	9.26844e+07	1.24456e+08	5.98886e+07	1.06005e+08	1.30198e+08	4.69595e+07	5.00306e+07	4.88144e+07	4.55136e+07	5.95725e+07
N-Acetyl-L-Tyrosine Ethyl Ester	1.02644e+07	3.77059e+06	1.097e+06	2.42821e+06	3.26234e+06	6.41341e+06	4.18619e+06	1.07173e+06	2.056e+06	2.56049e+06
N-Acetylornithine	3.02058e+07	1.51845e+07	6.07379e+06	2.08532e+07	1.91732e+07	3.99371e+06	3.07917e+06	8.08412e+06	8.01181e+06	7.81001e+06
N-Acetylputrescine	4.59225e+06	5.82085e+06	5.15994e+06	3.81992e+06	4.9858e+06	9.84061e+07	9.66168e+07	2.96586e+07	5.61625e+07	1.63657e+08
N-Acetylserotonin	2.94581e+06	2.7762e+06	1.8573e+06	3.18325e+06	3.92411e+06	4.12754e+06	4.07736e+06	3.19751e+06	3.30518e+06	2.90962e+06
Niacinamide (VB3)	1.03168e+10	9.37132e+09	8.1029e+09	9.07677e+09	1.12928e+10	9.02907e+09	9.28566e+09	8.6043e+09	8.72711e+09	9.88647e+09
Nicotinamide Mononucleotide (Nicotinamide Ribotide)	8.84221e+06	1.60353e+07	1.0778e+07	2.15811e+07	1.7678e+07	8.97982e+06	5.98646e+06	7.13917e+06	8.63245e+06	8.77017e+06
Nicotinamide Ribose	1.28395e+08	1.91811e+08	1.00975e+08	2.68811e+08	2.91596e+08	9.24348e+07	7.67747e+07	4.92064e+07	7.36809e+07	8.75353e+07
Nitrotyrosine	9.11547e+06	4.76285e+06	4.10653e+06	4.76925e+06	3.93144e+06	5.60562e+06	4.79212e+06	4.91059e+06	4.98279e+06	3.98758e+06
Octadecylamine	3.05948e+06	2.56293e+06	3.17813e+06	3.27264e+06	3.46273e+06	2.88207e+06	3.74817e+06	3.5958e+06	3.45343e+06	4.10897e+06
Oleamide	5.37736e+09	5.97476e+09	5.72772e+09	6.59496e+09	7.05377e+09	6.20898e+09	8.43902e+09	7.18552e+09	7.14005e+09	6.50599e+09
Oleoyl Ethanolamide	1.4422e+07	1.51163e+07	1.79306e+07	2.46133e+07	1.62156e+07	2.34158e+07	2.35555e+07	1.96216e+07	2.13803e+07	1.86959e+07
Ornithine	1.25644e+07	1.22622e+07	7.03392e+06	1.29694e+07	9.62612e+06	1.63643e+07	8.79923e+06	8.79897e+06	1.05187e+07	9.07391e+06
Palmitic Amide	3.47569e+08	3.31107e+08	3.29333e+08	2.92109e+08	3.05225e+08	2.36425e+08	4.07056e+08	3.10434e+08	3.32925e+08	2.66845e+08
Palmitoyl Sphingomyelin (SM(d18:1/16:0))	3.32405e+08	3.32784e+08	2.52533e+08	3.01798e+08	2.93179e+08	3.21549e+08	3.46264e+08	3.21497e+08	2.82935e+08	2.83612e+08
PC(35:4)	1.58865e+07	1.52887e+07	1.46147e+07	1.87339e+07	1.65638e+07	1.66429e+07	1.32058e+07	1.18427e+07	1.50567e+07	1.75424e+07
PC(35:6)	1.48791e+07	1.47458e+07	1.37523e+07	1.79746e+07	1.75183e+07	1.19137e+07	1.43289e+07	9.16975e+06	1.09854e+07	1.40125e+07
PE(p38:6)	7.18442e+06	6.74858e+06	5.94946e+06	9.14868e+06	8.05802e+06	8.05326e+06	7.19847e+06	8.26597e+06	8.913e+06	9.95317e+06
Phe-Arg	1.87803e+06	1.53547e+06	747717	2.84904e+06	2.76017e+06	4.70409e+06	2.89159e+06	3.88035e+06	2.7794e+06	1.64963e+06
Phe-Ile	428674	535377	449607	604847	743624	2.23613e+06	1.48057e+06	1.5316e+06	1.41444e+06	2.13601e+06
Phe-Leu	428674	535377	449607	604847	743624	2.23613e+06	1.48057e+06	1.5316e+06	1.41444e+06	2.13601e+06
Phenylacetylglycine	3.80426e+06	1.2176e+07	3.20044e+06	4.15747e+06	4.24723e+06	2.66292e+07	1.04913e+07	1.38208e+07	3.52328e+07	7.54441e+07
Phenylglyoxylic Acid	1.14193e+06	1.42512e+06	156105	461355	187593	621915	282239	191510	438694	698127
Phytosphingosine	4.14387e+07	3.85411e+07	5.2918e+07	1.00364e+08	4.87865e+07	8.60246e+07	4.93459e+07	6.58661e+07	6.40532e+07	3.68525e+07
Pivaloylcarnitine; 2-Methylbutyroylcarnitine; 3-Methylbutyrylcarnitine	6.62772e+07	1.35101e+08	8.69304e+07	1.08435e+08	5.95391e+07	1.04268e+08	6.97762e+07	1.13753e+08	1.10237e+08	9.94655e+07
PIVP (Phlorisovalerophenone)	320069	288000	277269	233409	321982	778357	256225	499000	561994	399556
Prenyl-L-Cysteine	1.23503e+08	9.85086e+07	7.98941e+07	1.17631e+08	1.2092e+08	1.50575e+08	1.33235e+08	1.38276e+08	1.25026e+08	1.23941e+08
Pro-Ala	5.40304e+06	6.97285e+06	7.99977e+06	5.05422e+06	1.12902e+07	1.11311e+07	1.01808e+07	6.02574e+06	4.98815e+06	3.32435e+06
Pro-Glu	510570	691760	451364	645480	625801	613989	645826	462186	496024	527672
Pro-Gly	2.102e+06	1.76962e+06	1.03065e+06	1.89705e+06	3.756e+06	2.95538e+06	2.94827e+06	1.83793e+06	2.44409e+06	2.78385e+06
Propionylcarnitine	1.11334e+09	1.32732e+09	1.61875e+09	1.07304e+09	1.38639e+09	7.64555e+08	7.94162e+08	1.43034e+09	1.24805e+09	9.34367e+08
Protoporphyrin IX	1.73943e+06	2.20806e+06	1.81861e+06	4.04473e+06	1.74538e+06	2.87276e+06	2.93407e+06	4.07657e+06	5.00668e+06	3.42824e+06
Purine	1.06842e+06	2.1355e+06	653856	1.96397e+06	1.71118e+06	3.43437e+06	2.69118e+06	1.27403e+06	2.06357e+06	2.89508e+06
Pyridoxamine	1.2411e+07	1.71556e+07	1.06731e+07	2.0128e+07	2.35468e+07	4.19133e+06	2.90417e+06	3.2397e+06	2.92559e+06	2.8141e+06
Riboflavin(VB2)	5.91182e+06	6.92327e+06	3.40274e+06	7.41098e+06	5.92165e+06	1.79966e+07	1.00136e+07	4.61638e+06	8.21019e+06	8.34073e+06
Saccharopine	2.29241e+06	1.73542e+06	2.48295e+06	2.98995e+06	1.52418e+06	3.73863e+06	2.41203e+06	1.1097e+06	1.26952e+06	1.12844e+06
S-Adenosylmethioninamine	2.94678e+06	2.10157e+06	2.23722e+06	2.5017e+06	2.58572e+06	2.15691e+06	2.83927e+06	4.36279e+06	4.29246e+06	3.39011e+06
Ser-Gln	1.17807e+06	775242	424197	799572	1.06514e+06	1.4942e+06	1.45196e+06	1.2019e+06	844662	759301
Serotonin	710331	4.986e+06	8.09141e+06	5.40516e+06	3.6006e+06	3.00928e+06	2.42907e+06	1.83254e+06	617909	4.31734e+06
S-Glutathionyl-L-Cysteine	1.38739e+07	1.04269e+07	9.4453e+06	3.79964e+06	1.00304e+06	5.36269e+06	1.16211e+07	3.60025e+07	1.16315e+07	8.98978e+06
Sphinganine	2.29971e+06	1.79093e+06	2.98835e+06	7.92402e+06	3.05591e+07	6.21684e+06	1.5506e+07	4.23493e+07	6.41568e+07	7.17479e+06
Succinylcarnitine	5.48954e+06	6.04561e+06	2.6456e+06	4.63747e+06	3.30131e+06	5.75411e+06	1.71876e+06	2.57824e+06	1.80221e+06	3.46582e+06
Taurine	7.09624e+08	9.60504e+08	8.2079e+08	8.90629e+08	1.07091e+09	1.80788e+09	1.67211e+09	1.22155e+09	1.14163e+09	1.36793e+09
Tetrahydrodeoxycorticosterone	492051	650618	992043	592116	580852	524941	4.14677e+06	2.10854e+06	2.79348e+06	4.0013e+06
Thr-Gln	5.11048e+06	1.89675e+06	944270	2.16932e+06	3.80146e+06	1.23936e+06	1.26027e+06	3.55996e+06	1.44582e+06	1.08981e+06
Thr-Glu	2.80105e+06	1.66009e+06	1.07018e+06	2.11794e+06	2.26459e+06	4.74952e+06	3.43418e+06	3.18833e+06	4.12049e+06	2.99504e+06
Thr-His	2.46325e+06	2.49944e+06	1.20831e+06	3.19226e+06	6.03109e+06	8.22286e+06	6.62589e+06	3.3481e+06	4.53256e+06	3.62052e+06
Tiglic Acid	3.04106e+07	2.19927e+07	1.17216e+07	2.41309e+07	2.68823e+07	2.85004e+07	2.24623e+07	2.19604e+07	2.7991e+07	3.00032e+07
Trans-Hexadec-2-Enoyl Carnitine	1.35893e+07	7.02841e+07	1.70116e+08	8.47548e+07	4.31759e+07	2.57531e+07	5.34144e+07	1.18821e+08	7.27628e+07	9.80318e+07
Trimethylamine N-Oxide(TMAO)	4.42468e+08	5.94615e+08	2.83347e+08	3.52509e+08	4.83716e+08	1.80942e+08	2.7492e+08	1.65072e+08	2.69681e+08	4.31174e+08
Tris-HCl(Chemical)	4.98602e+06	2.58131e+07	8.19798e+06	7.89562e+06	1.28163e+07	2.3186e+07	2.2348e+07	1.14133e+07	7.53583e+06	1.45984e+07
Tryptamine	663639	631288	469173	759921	984025	1.38246e+06	1.02129e+06	666276	795515	990451
Tyr-Ala	1.37654e+06	1.52687e+06	1.12092e+06	1.6184e+06	2.17309e+06	4.09576e+06	4.29382e+06	3.38079e+06	3.3816e+06	2.96098e+06
Tyr-Arg	1.36891e+06	1.2705e+06	923362	2.04732e+06	1.45997e+06	1.07023e+06	1.44186e+06	1.6134e+06	1.17206e+06	734887
Tyr-Gln	216467	211290	164728	293937	221500	569031	524807	456640	378911	343272
Tyr-His	958213	919399	643260	1.02929e+06	1.50338e+06	1.21033e+06	930424	1.80779e+06	1.37097e+06	1.14897e+06
Uridine 5'-Diphosphate-N-Acetylglucosamine	8.18152e+06	9.82764e+06	8.88024e+06	9.14504e+06	9.27548e+06	2.12045e+07	1.20514e+07	1.86952e+07	1.31576e+07	1.21242e+07
Urocanic Acid	3.82706e+07	3.85274e+07	2.93322e+07	3.38733e+07	3.20081e+07	1.6158e+08	5.67094e+07	3.02318e+07	3.07085e+07	3.6931e+07
Val-Arg	3.80082e+06	2.55489e+06	2.00785e+06	3.77627e+06	3.8141e+06	5.1756e+06	4.86313e+06	4.06551e+06	3.601e+06	2.40778e+06
Vitamin D3/7-Dehydrocholesterol	5.99737e+06	5.95581e+06	5.58595e+06	9.3925e+06	6.92653e+06	6.55973e+06	2.68432e+06	3.69869e+06	3.44519e+06	3.03644e+06
Xanthine	4.41673e+07	7.49267e+07	2.76544e+07	5.73744e+07	6.55975e+07	1.76282e+08	1.37931e+08	8.22378e+07	1.33902e+08	1.55857e+08
Xanthosine	512454	1.31282e+06	359262	1.78697e+06	913481	3.79384e+06	2.95256e+06	2.16731e+06	4.78353e+06	3.44556e+06
Xylulose/Ribulose/Arabinose/Ribose/Xylose/Lyxose	5.66655e+06	5.87402e+06	1.49494e+06	2.41336e+06	860406	7.12393e+07	6.54469e+06	1.52105e+06	4.20573e+06	2.08611e+06
(2S,4R,5S)-Muscarine	1577660	1770165	2432862	2789594	3172792	1420518	916863	2301557	2571828	3823631
2-Indolecarboxylic Acid	319226	143851	150128	189161	195239	957588	823296	1375312	2245779	2130104
2-Keto-6-Acetamidocaproate	3476488	2104964	3496475	4105055	3964165	7363060	52006347	3222011	8775624	18667028
2-Phenylglycine	7849690	4652861	1901512	7367163	4313195	3478718	3355168	3257414	4009416	3797317
2-Pyrrolidinone	2951727	5061730	6717161	6424823	5685388	7232879	10412155	5868345	7537962	10495907
3-Hydroxy-5, 8-Tetradecadiencarnitine	1883120	2858119	12056824	4789623	2721650	2259010	2850050	9198586	3895599	3063430
4-Aminohippuric Acid	2740820	1943279	1057139	1973054	2258688	35462204	10304365	3746596	15733134	39290759
4-Coumaryl Alcohol	1851190	1611800	1237769	1203248	2587834	11572608	8588246	2209349	8300943	8311293
4-Hydroxy-L-Proline	1159905	879577	960802	1131300	480431	3462650	2438036	1340973	2027596	2181891
4-Methoxycinnamic Acid	3430676	3670740	2177686	4663581	3574056	3510777	2945245	1904125	3107712	3727868
4-Pyridoxic Acid	4649170	4659565	1238453	2758613	3524960	10077563	9971645	3246408	10169771	16221888
5-Hydroxyindoleacetic Acid	569174	485381	507914	671275	337491	3554712	4159577	733783	1365981	3225416
Acetylcholine	16110769	15423192	16033428	25103506	22208763	77707678	37165813	38478289	40345386	22981947
Acetyl-L-Cysteine	896386	195495	102456	473845	587366	1720415	1604871	1198144	3764069	8723429
Acylcarnitine(10:3)	2474102	6988749	15283962	10165569	7654540	14105871	12915356	10389631	6189512	7093592
Acylcarnitine(14:2)	37740213	26102073	41655782	41524142	27224901	7616118	7987116	23872093	14615660	11851768
Acylcarnitine(14:3)	2428445	2038306	4098963	2849438	2553902	1520178	961982	2298309	1724669	1688877
Acylcarnitine(20:3)	11490169	19378690	22568615	28760082	14213380	6909202	4640015	15832879	8712643	9577290
Acylcarnitine(22:1)	968200	1764624	2827858	3983810	1590464	2898250	5147643	3155863	3772261	2894311
Acylcarnitine(22:2)	1873976	4101600	6965767	9401974	2693142	6078729	8217417	6931253	6053575	4642450
Ala-Gln	912056	1031835	704561	1558797	1775054	2144665	2201087	2102392	1314367	1086295
Ala-Pro	1597166	3671034	6998941	2844747	3979484	4942765	5020595	2969021	2811982	3453709
Ala-Val	3248708	3758067	2924548	4089246	3452206	4865524	3921484	4215258	3381892	2947433
Arachidyl Carnitine(C20:0)	1953994	3770138	5519435	4892714	2219482	4039387	3817749	3261218	4537381	3426777
Arg-Asp	698755	790863	513425	1321276	991869	764454	542169	858486	634618	410970
Arg-Glu	721544	411406	197362	489005	1691741	3835056	2130835	625932	1197060	1186725
Arg-Ser	1935000	1731095	1198359	3101561	2712742	2143622	1711199	2290922	1686187	463971
Asp-Arg	953296	343399	235824	701222	1038352	1691105	1071452	901126	944224	629598
Asp-His	980413	1812203	1223783	2008568	1515659	929625	960240	792828	902722	734662
C18:3-OH Carnitine	858154	2495060	7597619	6212440	1808271	966025	829007	4129224	1355129	1377661
Cortisone	551348	1395982	2632456	1860696	1312998	4669907	4092171	3732249	2233334	2910871
Cys-Gly	462462	317088	49369	1311919	355496	15686	7910	29779	40608	13710
Cys-Pro	21958914	32725007	26129343	12932444	5299188	17408810	35099329	82616533	37704962	26003547
Cytidine	396732	548803	542271	688245	736433	581765	640145	510185	239033	273272
Cytidine Monophosphate	3719316	5209181	4606757	5403972	5451929	7742780	6046760	7259090	6729568	6996636
Cytosine	9842437	15203040	3398505	9456680	7972954	32083662	50777911	25212678	43558639	77032577
Demethylated Antipyrine	586113	1216258	143541	166703	357111	499786	615467	746963	5125216	18137517
Gamma-Glutamyltyrosine	1408684	1048593	511100	827769	857952	2001189	1471187	852891	1334449	1064256
Gamma-Linolenyl Carnitine; Alpha-Linolenyl Carnitine	5512044	10966487	27592616	17034626	12151076	4879064	7878263	15726698	10750654	19482282
Gln-Ala	1710810	1332469	365273	1258087	1764611	3120026	2733851	1176105	1978577	1200059
Gln-His	341125	417425	175360	518239	857837	1803016	1124978	672480	820714	782119
Glu-Arg	721544	411406	197362	489005	1691741	3835056	2130835	625932	1197060	1186725
Glu-His	2653041	2037961	1870480	3408372	1652637	2563625	1747827	2156240	2436849	1850303
Glu-Lys	3589825	3634859	2074296	5705659	3307022	5866609	4371743	5045821	4578228	3652452
Glu-Trp	828194	1116271	522776	709577	303323	807307	961574	935689	861840	728945
Gly-Asn	979617	865549	509542	1182231	2287160	3085472	2332887	1503619	1721712	1639701
Gly-Ser	548461	531480	355750	622314	1094816	969039	901541	570825	747669	757813
Heptadecanoyl Carnitine	2366458	6030258	20605047	12374192	4882923	5828083	5245647	12486354	7687103	4884184
Heptanoylcarnitine	2456000	5231202	3041803	5291947	3357115	991597	759545	1939695	1174767	1551124
Hippuric Acid	1800632	2270295	1764275	2601779	4973051	872548	672694	884326	1217764	1694018
His-Asn	274955	215850	99342	266633	426622	965910	719103	402100	498093	482048
His-Asp	980413	1812203	1223783	2008568	1515659	929625	960240	792828	902722	734662
His-Gln	341125	417425	175360	518239	857837	1803016	1124978	672480	820714	782119
His-Ile	913150	1059576	636913	1370914	1293029	1750941	1415018	1576833	926745	852587
His-Leu	913150	1059576	636913	1370914	1293029	1750941	1415018	1576833	926745	852587
His-Ser	309325	360907	181367	439595	665396	1400690	852874	563902	630680	623571
His-Val	1993380	1829097	1041560	1905027	1770098	4506167	3110670	3051085	2424520	1723221
Homoserine	7294844	5402570	2475788	6461957	7039012	8197960	6330153	6127982	8419066	6729258
Hydroxyhexanoycarnitine-1	5732619	7850206	21614449	13843099	9935937	5279165	10795526	11390431	10582123	9784894
Hydroxyhexanoycarnitine-2	4498641	5307210	10175029	8074490	5775688	2272768	12786772	10762286	13257947	13597849
Hypoxanthine	9046211697	8923522390	7086920301	9336739286	11193611583	10814622236	9223493828	6277788196	8019602766	9288641923
Imidazoleacetic Acid	2683459	3301480	2313991	3619453	2884670	12184482	17959117	5586281	8614521	10157312
Iminodiacetate(IDA)	5826464	3820563	4923130	4743753	6046047	7127360	60750763	4903811	12082101	27271804
Isovalerylglycine	15510926	29785466	30677374	28554378	33645260	28449234	31969611	26669965	26531382	42316567
L-Histidinol	482190	699993	348162	645272	662887	1797613	1992366	1064028	1229505	1638320
L-Homocitrulline/N6-Carbamoyl-DL-Lysine	2127249	961298	306439	1228433	660593	1330038	1289000	1602610	1174093	1533300
L-Isoleucine	97034613	88295039	66535388	116584530	149693813	187360939	116099794	105450844	116651309	151243442
L-Kynurenine	154615	509580	129961	206759	115376	3628698	2738583	2642870	2948637	3780447
L-Threonine	55727748	42836653	30892007	59055200	80731037	111533861	83088958	65694130	73842834	75359095
L-Valine	94605340	88870492	144506518	145754919	133369826	186569037	232553288	189570922	119279721	194055534
Lys-Ala	1904189	2622252	1680397	3595535	3748438	4643779	4372804	4545488	3934382	4999927
Lys-Asn	2242520	1150674	668737	2049129	2849431	5238124	3091741	2720610	2549431	1678103
Lys-Gln	1402529	1371922	912784	2947811	1830878	1172902	829488	1873156	936849	431341
LysoPC(15:0)	14144839	10304906	14972965	14338070	13459748	7384639	7634242	6399063	5479384	4925370
Lys-Tyr	3562049	3258000	1220174	3720093	6777438	3590220	1656029	2639772	2034207	1387540
Methylimidazoleacetic Acid	6339155	8981703	4784369	6035924	5346319	293453270	354392645	50652121	92851146	198863684
N,N-Dimethylaniline	16293429	8484691	22019534	24572512	13259187	21732130	12869180	14789897	9887047	17722203
N-Acetyl-D-Glucosamine-6-Phosphate/N-Acetyl-D-Mannosamine 6-Phosphate	1300119	1777779	1540570	2285748	2450743	6433933	9154384	8655209	11611063	11505919
N-Acetyl-L-Alanine	1159905	879577	960802	1131300	480431	3462650	2438036	1340973	2027596	2181891
N-Alpha-Acetyl-L-Asparagine	5369474	4038658	2309837	3682921	4832066	1760284	1232338	4151748	2867067	2656904
N-Alpha-Acetyllysine	11834835	9454053	3539057	13243180	13785101	7541538	6176363	4352953	5572332	8578539
N-delta-Acetyllysine	10855040	5142606	2688453	6127843	4893401	2459402	2517515	3989952	3430398	3789608
Nicotinic Acid	1978168	2150062	1437062	2630637	2744702	1463654	1224294	658893	1309553	1306308
Octopamine	6104309	4646130	2294479	3798731	3982422	3043910	2643830	3500500	3342629	3476571
Ophthalmic Acid	609612	431200	428685	494895	252204	603743	1694917	1397412	697252	805937
PE(36:4)	16654037	18819402	17980521	21051968	20134905	16850993	19170006	13094041	14845247	19587815
Pentadecanoylcarnitine(C13:0)	1524160	5578179	19181815	11308374	3982020	2835862	3179136	11745115	5594519	4044849
Phosphorylcholine	2531391232	3452900319	3082550178	3559853598	3365132217	5755349016	4551682329	4983178907	4161541089	3974908736
Pro-Pro	5839033	8360418	3763980	5751827	11334023	13339446	14949147	8114847	2703431	1719699
Pro-Thr	1073146	1216511	509805	1276957	3856417	2395927	2036943	1066798	1239366	1103219
Putrescine	3536974	3055519	3400790	2705183	1749430	9333547	9678941	5944813	7119269	10158267
Ribothymidine	255718	148110	74563	197818	189623	1441371	1963505	376256	462703	729866
Ser-Ala	2159293	1973302	1574056	2520217	2762854	4767814	3708370	2406042	2279434	2064177
Ser-Arg	1935000	1731095	1198359	3101561	2712742	2143622	1711199	2290922	1686187	463971
Ser-Asn	1057301	727330	477006	969585	1181303	1754765	1525813	934853	948803	781612
Ser-Gly	604473	358437	279330	400852	659902	1229813	927401	912391	835246	717364
Ser-Ser	1245852	861615	644469	1038730	1212357	1705708	1732190	1093919	1000855	842379
Sphingosine	2143327	2828447	3059895	3044510	3369805	11391082	9700974	6651298	8906314	7315290
Suberylglycine	1088468	2322986	1376269	2149358	3365005	6095457	7296424	3108746	4565662	5525391
Thiamine Monophosphate	16305016	13221191	11131227	18669709	22021336	25792562	12743899	13079715	12128006	12055582
Thr-Arg	659734	609821	344010	957297	1339416	1924166	1300392	1173542	1014346	709533
Thymine	3686849	2191162	2692713	3685052	3910283	3235554	2953088	2003195	1574265	1545916
Tiglylglycine	3504130	2185038	29188	4870550	4432440	8644727	9897474	846024	1983318	2578947
Tyramine	5913943	6458977	4471744	6014780	5121926	7490995	6630832	5169766	10544204	28246701
Tyrosol	552462	830455	683035	365555	331743	8912403	2330283	615744	799740	1450313
Val-His	4061226	3056707	2277177	4021763	4983270	6216637	3724605	5715121	3866516	4078468
3-(2-Hydroxyphenyl)Propionic Acid	39520	38909	40100	37391	36303	36767	35392	32679	38253	38200
3-Aminoisobutanoic Acid	138947	93875	118000	126817	126121	178255	150511	139721	182653	151807
3-Hydroxyphenylacetate	1909	5585	1693	2512	1981	6641	7795	6556	57984	134378
3-Phosphoglycerate/2-Phospho-D-Glyceric Acid	728674	860544	531371	938738	845292	770738	752820	1196938	1026060	888606
4-Acetamidobutanoate	1435	1298	807	891	977	3246	5589	2368	5605	6280
4-Hydroxyproline	118457	66588	60514	72285	72279	20262	24080	59297	50791	47169
5-Aminolevulinic Acid	527473	430680	309109	565380	457018	1349703	1485025	1434816	1602509	1656600
5-Methylcytosine	55758	51077	29794	48645	35000	1160462	801046	122576	259775	603119
6-Phosphogluconic Acid	10502	12009	10204	11227	13629	23346	23806	18495	21910	18226
Acetoacetyl-CoA	61893	88449	65993	85606	51548	84000	46752	60982	86006	79624
Acetyl-CoA	9016	82344	71410	35619	28228	18466	13677	25660	45038	64800
Adenine	617629	422048	286790	558777	528774	210065	270285	246721	237597	230868
Adenine-neg	175324	145144	77225	145094	160214	54272	71210	70578	57537	63695
Adenosine Diphosphate Ribose	1920388	1703043	1751794	1135506	1488886	756262	892501	1448894	1477706	740194
Adenosine Monophosphate(AMP)	6619394	6847297	7952381	6751845	4695695	5175335	4925122	9393668	5800075	4340021
Adenosine Triphosphate(ATP)	945042	987597	817934	847357	1317053	1359254	1546084	2429701	2202462	1516743
Adenylosuccinic Acid	113225	269028	491796	297449	145745	274783	335763	612614	413267	634393
ADP-Glucose	37754	57075	55768	39352	40695	18208	17922	26910	25178	28258
Allantoin	45199	40598	17584	29447	33087	153983	151442	61261	162721	194313
Alpha-Lactose	6126	3107	2924	4926	4369	1256	1599	1270	1194	1425
Anserine	341209	208667	80411	357448	120856	68082	111807	116531	166412	97729
Azelaic Acid	35441	21282	20995	18244	23583	37054	55307	34627	56380	77200
Azetidine-2-Carboxylate	14599	13827	6513	16329	18966	23096	12947	11268	17481	12488
Beta-Alanine	134896	70806	63817	99846	97138	134604	135136	137737	158796	100615
Betaine	37009284	45002376	79242782	34625805	39633425	97060841	61983615	48394322	41280287	38168504
Biliverdin	22106	25555	31535	19258	17529	42872	25909	24612	30292	43162
Butyrylcarnitine	39467	108832	80240	93582	61005	63969	52394	92725	75271	70733
Butyryl-CoA	2031	11602	9934	7792	4695	5842	4473	6496	10402	8518
Cadaverine	7698	6780	7366	7735	7610	14734	20958	12671	20834	50101
Ciliatine	77908	88363	75490	90841	97594	141128	137978	118976	109149	144039
Cis-Aconitic Acid	22309	27548	41080	26958	17420	68710	55371	38188	32569	42662
Citric Acid	78878	110443	153323	136414	78655	470326	464925	237364	187519	227187
Citrulline	70576	68960	43652	60050	59285	66570	62486	73297	75023	83877
Coenzyme A	54390	84747	66497	37466	41109	96071	69778	55316	64861	104705
Creatine	25891679	21774490	14836772	28076129	21923091	67074066	74602130	70638350	77863108	80134230
Creatinine	47558	59292	36724	40448	47085	145951	125264	89087	102488	170752
Cyclic adenosine monophosphate(cAMP)	8845	9681	8908	9086	5676	9283	7893	8809	8231	7030
Cytidine Diphosphate(CDP)	43444	36904	35666	45295	41813	48297	40024	41649	43573	44220
Cytidine Monophosphate N-Acetylneuraminic Acid	215698	264510	274283	205112	232878	251295	207932	286167	222236	253536
Cytidine Triphosphate(CTP)	5822	5626	5478	6302	9680	11321	15336	15436	20758	28798
D-2-Hydroxyglutarate	897567	514006	421992	469172	506084	503115	704915	499201	664697	855191
D-Arabitol/D-Xylitol/Ribitol	3194	1812	1821	2867	5296	1268	2620	2026	1975	2844
Deoxycarnitine	345775	497343	606105	285013	299843	737140	417673	320697	417018	501946
Deoxyuridine-dU	10107	6014	4964	7221	6963	11454	8884	5919	5729	5552
D-Glucose	40216	44958	30549	38475	40864	27642	23267	23380	23449	19342
D-Glucuronic Acid	258845	431674	415556	273926	652373	180866	148163	189865	154149	188442
Dihydrouracil	7036	8761	3809	9637	6332	12646	8455	8093	16002	10020
D-ribulose-5-phosphate/Xylulose 5-phosphate	47371	82653	44030	39931	90273	77781	94597	64247	139890	70431
Ethanolamide	309104	330236	296406	423502	524273	505401	393488	283533	362088	322403
Flavin Adenine Dinucleotide	332781	239892	200265	222831	237384	167316	165489	179309	163357	138390
Fructose 1,6-Bisphosphate	5097	13504	9689	5083	12519	123376	94514	34327	90883	215174
Fructose 1-Phosphate	14800	27779	22621	20639	40684	23517	20175	20888	17588	22789
Fructose 6-Phosphate	52440	78100	55235	74548	94078	89338	54292	75019	76191	72631
Fumaric Acid	125033	291120	317235	330544	213050	212365	311993	252497	275017	376740
Galactaric Acid	10508	6589	1684	4269	4401	2461	5007	2744	4122	8493
Galactitol/L-Iditol/Mannitol/Sorbitol	24790	58614	174089	42359	79129	6790	11779	46112	10715	20103
GDP-Fucose	166555	148861	144445	125935	125228	122128	91011	140211	120948	109501
GDP-Glucose/GDP-mannose	9572	8302	7896	6262	6053	4461	6917	6260	4721	4565
Gluconic Acid	821322	468623	168029	329282	463586	222288	215631	143496	165589	187835
Glucose 1-Phosphate	10653	16975	10744	11574	24266	14346	20162	12964	15677	15541
Glucose 6-Phosphate	48311	66501	49290	51312	93713	68009	64151	68976	75293	87665
Glutaric Acid	6833	5174	6229	5356	6226	36120	34707	22917	42414	57527
Glyceric Acid	16933	18992	11002	21572	21938	9452	11999	17387	15497	10578
Glycerol 3-Phosphate	6724031	9381467	6725837	11093946	11484339	12075876	12910282	7399302	9166013	11751323
Glycerophosphocholine	123953722	147563101	168030869	136911099	123097182	69953196	88782939	129437892	84024254	89230492
Glycine	65789	40263	34911	50671	53169	39684	43239	46422	43197	40632
Guanidoacetic Acid	1302245	1147223	761162	1201756	914467	635758	462075	284436	316108	230080
Guanine	727063	366665	276640	270158	569347	133141	141382	74539	125661	124984
Guanosine	2728757	1810479	1318079	1523183	2945147	969789	1043465	461022	745662	912587
Guanosine Diphosphate(GDP)	178559	184470	189673	213174	289518	406187	224581	369316	512766	396202
Guanosine Monophosphate(GMP)	130776	117850	152576	122612	96121	104486	105759	166349	86838	79221
Guanosine Triphosphate(GTP)	12492	16228	13535	18025	40389	37809	25806	30372	74342	34171
Hypotaurine	99622	31128	109816	38058	56307	141829	27782	45225	54730	35224
Inosine	73549793	59877020	44495568	53731165	77038908	60548903	59616268	36168568	47541017	54986176
Inosinic acid(IMP)	1436783	2123325	2525396	1855336	1996557	4908626	2943692	3572954	3120236	2676828
IS-D3-MET	101861	82687	84425	85377	94786	84979	88005	85272	92418	85349
Is-Inosine-4N15	61464	50115	65573	66822	47281	55129	62982	68617	60701	54299
Isocitric Acid	1098	708	1034	1935	1385	1066	3826	2851	2083	2022
Is-Phenylalanine-D8	1273469	783715	1122082	1121158	937254	901200	1103655	1012142	992220	900166
Is-Succinic Acid-D4	380372	364712	363131	375901	387762	373132	367210	361467	361733	371242
L-Acetylcarnitine	6712259	13382533	11864500	12890899	7630920	5663744	6359736	15880856	7287717	7201886
L-Aspartic Acid	7229241	4728173	3684239	4540493	5222155	2417951	1818890	4948680	3553973	3066091
L-Carnitine	13216479	14714166	12184322	13830744	14524992	12077339	12334462	14556083	14035078	14261219
L-Cystathionine	25916	10024	10912	17808	20445	17484	9083	11804	13779	15062
L-Cystine	1861101	911031	873965	1425063	1573704	1601622	1086677	1264297	1317580	985984
L-Dopa	77758	52490	36013	56048	54803	61172	91065	55161	86797	89418
L-Glutamic Acid	40021783	34197564	28506926	36848719	36766774	30933554	25988549	32117376	28348087	28326420
L-Glutamine	1270583	883751	924607	950120	780256	894783	526682	477416	446069	379247
L-Isoleucine/L-Leucine/4-Hydroxy-L-Proline	11801867	10070230	7093308	11600490	14380904	22643705	12900825	9653448	11853009	11174309
L-Lactic Acid	2073730	2207751	1462727	2052092	1919059	1662476	1692997	1381567	1605208	1498017
L-Methionine	1304862	816416	617274	962240	1567139	1860373	1261219	774324	1052386	994853
L-Phenylalanine	2409418	1353879	1251316	1998002	2528147	3768057	3078113	1895604	2350309	2165306
L-Serine	66838	59937	53377	62497	105502	96287	91665	58025	83420	69132
L-Tyrosine	2616542	1956871	1505631	2086016	3063341	4415332	3168908	2027419	2799443	2616943
Malic Acid	1513697	2216838	2515908	2304464	1459153	2013152	2707834	2101803	2304684	2987958
Malonic Acid	53165	46037	48299	58029	33393	33424	251721	58184	79345	87368
Methacholine	1405040	882046	476851	903503	1029914	1187619	849820	866937	1123556	1197822
Methylmalonyl-CoA	28700	32560	22950	31184	20413	50668	52322	23289	58390	43145
Myoinositol	648183	1126858	1326639	882879	875181	847421	856024	843452	782403	799730
Myristoyl-Carnitine-14	74049	242564	1003382	492281	197935	83473	117594	502698	278360	229434
N-Acetylneuraminic Acid	16611	18911	15953	16547	15561	30342	35453	31538	30274	31727
NAD	2050694	2241635	2156866	2587120	1264187	360957	300261	1231373	644403	334146
NADH	145170	364942	383734	443664	310955	138788	141520	220915	215306	216107
NADP	1112899	882153	946938	811216	555302	370614	309764	759104	616648	386965
NADPH	35358	27069	45990	52912	16287	24843	6563	12102	15457	6648
N-Amidino-L-Aspartate	14700	10026	7574	11739	18786	134235	203184	67771	89127	166972
N-Carbomoyl-L-Aspartate	9090	5739	2340	5145	4915	1114	6341	15253	14642	27083
Nicotinamide Riboside(NR)	10066	22200	17789	29548	16351	8965	819	8521	10027	9581
Nicotinamide Ribotide(NMN)	1418349	2672506	1442350	2761109	2158431	881549	394243	778055	724339	618526
Nicotinamide(NAM)	22436883	13560886	14660087	16135571	19817599	14150920	15472076	14556878	14225619	13631728
O-Phosphoethanolamine	7946526	9800335	9338839	9327283	9260937	11464007	10962227	10441821	10100000	9988896
Orotic Acid	9729	10060	4098	6080	5082	2332	5600	11866	9013	16522
Oxalacetic Acid	57427	45385	35565	47910	47296	399259	367139	244355	418794	627757
Oxidized Glutathione(GSSG)	29788	23747	19378	1315	18555	2571	19358	117473	15228	9171
Pantothenic Acid	223948	173136	108419	210800	169754	622105	436983	394205	417740	355813
Phenylacetic Acid	8277	5670	7676	6295	7037	6782	6998	6358	6710	5543
Phosphocreatine	2765	4822	3722	9873	2537	33001	30208	137090	84751	65831
Phosphoenolpyruvic Acid	728681	809841	520002	885018	829424	455207	470985	878929	802950	603478
Phosphoribosyl Pyrophosphate(PRPP)	1135	1302	1545	1642	2848	5020	7451	8968	10918	2984
Phthalic Acid	18649	16824	19861	19567	19487	18210	17445	16937	17563	17401
Propionyl-CoA	1315	4508	5761	2288	2239	1610	1669	1730	4463	3591
Pyridoxalphosphate	47486	44124	40993	43830	44550	53949	42614	57143	53101	50227
Pyroglutamic Acid	186381	97134	57222	95662	105756	166836	113503	127224	113605	100537
S-Adenosylhomocysteine	176876	159322	109889	304573	183471	128280	119839	116019	145645	124513
S-Adenosylmethionine	674578	435661	384556	308314	481676	321404	384145	402138	427212	416810
Sedoheptulose 1,7-Bisphosphate	16026	19525	14689	13591	26131	72707	75443	52184	82755	104633
Sedoheptulose 7-Phosphate	139510	111452	69949	72047	169797	139037	124272	51996	106720	93059
Succinic Acid	2638777	2474543	1993295	2689978	1482972	1253516	2236909	1560919	1713628	1868301
Succinyl-CoA	1747	3772	4342	2586	1799	3969	2956	4716	4661	3864
Thiamine	253422	176178	112076	220827	319305	243552	95462	88425	100652	116136
Trigonelline	1067185	766462	151932	754814	511503	100998	53349	146808	177311	140307
UDP-Xylose	485173	434230	348349	440897	420864	197719	227382	403435	283069	241686
Uracil	169040	151671	104972	164624	187436	317742	262440	231144	410620	395696
Uric Acid	24633	58542	14594	30201	23614	223603	193725	251612	381754	272317
Uridine	842762	716213	560335	711808	928745	706484	590284	416917	418448	473312
Uridine 5'-Diphosphate(UDP)	12842	14720	13549	11605	14655	22969	15780	21114	16357	16331
Uridine 5'-Monophosphate(UMP)	291158	307181	336965	294293	280562	446874	310547	390526	256297	215664
Uridine Diphosphate Glucose	7235737	7621776	6872141	5632411	7840620	6936344	6500361	9872897	6763236	6106650
Uridine Diphosphate Glucuronic Acid	5921957	3236409	4681511	3488870	3017782	2216450	3906006	3982614	2733228	1978783
Uridine Diphosphate-N-Acetylglucosamine	4853169	5303968	4547826	4308835	4738813	9738710	5697157	8152097	5804460	5303911
Uridine Triphosphate(UTP)	34321	25941	18775	23581	55162	70832	76020	86797	100293	87050
